# Supplementary material for: A gene–phenotype relationship extraction pipeline from the biomedical literature using a representation learning approach
Source: Oxford University Press journal article supplement (doi:10.1093/bioinformatics/bty263), 2018-04-25
Supplement: bioinformatics_34_13_i386_s1.pdf [file bioinformatics_34_13_i386_s1.pdf]

Compared with TAIR

| Locus_name | Gene names (primary) | Gene names (synonym)                                                                                                                              | phenotype                                                                                                                                                                                                                                                                                                                                                                                                                                                                                                                                                                                                                                                                                                                                                                                                                               | pubmed_id | #Original Relation | #Covered Relation |
|------------|----------------------|---------------------------------------------------------------------------------------------------------------------------------------------------|-----------------------------------------------------------------------------------------------------------------------------------------------------------------------------------------------------------------------------------------------------------------------------------------------------------------------------------------------------------------------------------------------------------------------------------------------------------------------------------------------------------------------------------------------------------------------------------------------------------------------------------------------------------------------------------------------------------------------------------------------------------------------------------------------------------------------------------------|-----------|--------------------|-------------------|
| AT1G09570  | PHYA                 | ELONGATED HYPOCOTYL 8 FAR RED ELONGATED 1 FAR RED ELONGATED HYPOCOTYL 2 PHY2 FRE1 HYS phyTochrome A                                               | During cFR irradiation, mutant seedlings were almost completely unresponsive compared to WT.                                                                                                                                                                                                                                                                                                                                                                                                                                                                                                                                                                                                                                                                                                                                            | 7630933   |                    |                   |
| AT1G09570  | PHYA                 | ELONGATED HYPOCOTYL 8 FAR RED ELONGATED 1 FAR RED ELONGATED HYPOCOTYL 2 PHY2 FRE1 HYS phyTochrome A                                               | No other significant differences from WT were detected in mutant seedlings in response to cR, cB, or cW.                                                                                                                                                                                                                                                                                                                                                                                                                                                                                                                                                                                                                                                                                                                                | 7630933   |                    |                   |
| AT1G54990  | AXR4                 |                                                                                                                                                   | auxin resistant; irregular rosette leaves, slightly curled around leaf axis; roots elongate on auxin-containing medium; defective root gravitropism; reduced number of lateral roots                                                                                                                                                                                                                                                                                                                                                                                                                                                                                                                                                                                                                                                    | 7704045   |                    |                   |
| AT1G54990  | AXR4                 |                                                                                                                                                   | auxin resistant; irregular rosette leaves, slightly curled around leaf axis; roots very auxin resistant; defective root gravitropism; reduced number of lateral roots; plant appearance similar to axr1-12, but more pronounced; dwarf, bushy plants; reduced plant height; reduced fertility.                                                                                                                                                                                                                                                                                                                                                                                                                                                                                                                                          | 7704045   |                    |                   |
| AT1G54990  | AXR4                 |                                                                                                                                                   | auxin resistant; narrow, irregular rosette leaves, slightly curled around leaf axis; roots elongate on auxin-containing medium; defective root gravitropism; reduced number of lateral roots - greater reduction than for either single mutant; dwarf, bushy plants; reduced plant height; ethylene resistant; reduced fertility.                                                                                                                                                                                                                                                                                                                                                                                                                                                                                                       | 7704045   |                    |                   |
| AT1G05180  |                      |                                                                                                                                                   | auxin resistant; irregular rosette leaves, slightly curled around leaf axis; roots very auxin resistant; defective root gravitropism; reduced number of lateral roots; plant appearance similar to axr1-12, but more pronounced; dwarf, bushy plants; reduced plant height; reduced fertility.                                                                                                                                                                                                                                                                                                                                                                                                                                                                                                                                          | 7704045   |                    |                   |
| AT1G05850  | CTL1                 | ARM ELP1 ERH2 HOT2 POM1                                                                                                                           | Callus-induced roots from the mutant displayed the mutant phenotype when they grew under restrictive conditions. All the mutants responded to a gravitropic stimulus in a manner similar to wild type although the change of the direction of growth was slower than wild type.                                                                                                                                                                                                                                                                                                                                                                                                                                                                                                                                                         | 7743935   | 1                  | 0                 |
| AT1G05850  | CTL1                 | ARM ELP1 ERH2 HOT2 POM1                                                                                                                           | When grown on soil, the mutant exhibited reduced growth and smaller leaves.                                                                                                                                                                                                                                                                                                                                                                                                                                                                                                                                                                                                                                                                                                                                                             | 7743935   | 1                  | 1                 |
| AT1G05850  | CTL1                 | ARM ELP1 ERH2 HOT2 POM1                                                                                                                           | When grown on media containing 0.5% sucrose, the mutant had reduced root length but no apparent radial cell expansion.                                                                                                                                                                                                                                                                                                                                                                                                                                                                                                                                                                                                                                                                                                                  | 7743935   | 1                  | 1                 |
| AT1G58250  | SAB                  | HPS4 SABRE                                                                                                                                        | Mutation causes abnormal cell expansion of the root cortical cell. A shift in the orientation of expansion from longitudinal to radial direction was observed in the roots by confocal microscopy. Mutation was partially rescued by adding ethylene biosynthesis inhibitors. Aerial part of the mutant plants had visible leaf phenotype, with short wide leaves (including cotyledons) and shorter and wider petioles, when compared to wild type.                                                                                                                                                                                                                                                                                                                                                                                    | 7867930   |                    |                   |
| AT1G66340  | ETR1                 |                                                                                                                                                   | Ethylene insensitive. Lacks triple-response phenotype when grown in the presence of ethylene.                                                                                                                                                                                                                                                                                                                                                                                                                                                                                                                                                                                                                                                                                                                                           | 8211181   |                    |                   |
| AT1G05180  |                      |                                                                                                                                                   | Decrease in SCP<sup>TIR1</sup> ligase activity.                                                                                                                                                                                                                                                                                                                                                                                                                                                                                                                                                                                                                                                                                                                                                                                         | 8321287   |                    |                   |
| AT1G09570  | PHYA                 | ELONGATED HYPOCOTYL 8 FAR RED ELONGATED 1 FAR RED ELONGATED HYPOCOTYL 2 PHY2 FRE1 HYS phyTochrome A                                               | The responsiveness of the mutant to increasing fluence rates of R <sub>c</sub> was essentially identical to the wild type.                                                                                                                                                                                                                                                                                                                                                                                                                                                                                                                                                                                                                                                                                                              | 8400877   |                    |                   |
| AT1G68890  | PHYLL0               |                                                                                                                                                   | Pale green plants                                                                                                                                                                                                                                                                                                                                                                                                                                                                                                                                                                                                                                                                                                                                                                                                                       | 8717135   |                    |                   |
| AT1G31480  | SGR2                 |                                                                                                                                                   | Inflorescence stem failed to curve upward even after 6 h of horizontal gravistimulation. Plant size not affected in this mutation, inflorescence stem twisted as the elongated, and the lateral branches twisted downward. Reduced gravitropic response of etholated hypocotyls. Root gravitropism was normal.                                                                                                                                                                                                                                                                                                                                                                                                                                                                                                                          | 8819871   |                    |                   |
| AT1G16540  | ABA3                 | ABA DEFICIENT 3 AC12 ALTERED CHLOROPLAST IMPORT 2 ATABA3 ATLOSS LOSS LOW OSMOTIC STRESS 5 MOLYBDENUM COFACTOR SULFURASE SIR3 SIRTINOL RESISTANT 3 | abscisic acid deficient, reduced level of endogenous ABA during various stages of plant and seed development, but relatively higher ABA content than other aba mutants; impaired in ABA biosynthesis, blocking the conversion of ABA-aldehyde to ABA; increased leaf transpiration rate, but relatively low rate of water loss than other aba mutants, which leads to a slightly wilted phenotype especially under low relative humidity and water stress; wilted phenotype can be restored to normal by spraying an ABA solution to the plants; reduced seed dormancy, fresh seeds germinate at high frequency, germinate in silique on plant at high relative humidity; decreased sensitivity to the presence of GA biosynthesis inhibitors such as paclobutrazol; reduced sensitivity to salt and osmotic stress during germination. | 8893542   |                    |                   |
| AT1G12360  | KEU                  |                                                                                                                                                   | Mutant keule embryos have large multinucleate cells with gapped or incomplete cross walls, as well as cell wall stubs that are very similar to those observed upon caffeine inhibition of cytokinesis in plants. Slower cell division. The planes of cell division are often misoriented. keule mutants die as seedlings with large polyploid cells.                                                                                                                                                                                                                                                                                                                                                                                                                                                                                    | 9003313   |                    |                   |
| AT2G01940  | SGR5                 | IDD15                                                                                                                                             | Inflorescence stems of mutant plants showed abnormal gravitropic response, while gravitropism in hypocotyls and roots was not altered.                                                                                                                                                                                                                                                                                                                                                                                                                                                                                                                                                                                                                                                                                                  | 9210330   |                    |                   |
| AT2G01570  | RGA                  | GRS RGA1                                                                                                                                          | Early flowering compared to wild type.                                                                                                                                                                                                                                                                                                                                                                                                                                                                                                                                                                                                                                                                                                                                                                                                  | 9215910   |                    |                   |
| AT2G01570  | RGA                  | GRS RGA1                                                                                                                                          | No increase of germination or restoration of male fertility compared to the single gal-3 mutant.                                                                                                                                                                                                                                                                                                                                                                                                                                                                                                                                                                                                                                                                                                                                        | 9215910   |                    |                   |
| AT2G01570  | RGA                  | GRS RGA1                                                                                                                                          | Partially restored stem height (59% of Ler wild type).                                                                                                                                                                                                                                                                                                                                                                                                                                                                                                                                                                                                                                                                                                                                                                                  | 9215910   |                    |                   |
| AT2G01570  | RGA                  | GRS RGA1                                                                                                                                          | Rescue of the nonflowering phenotype of gal-3.                                                                                                                                                                                                                                                                                                                                                                                                                                                                                                                                                                                                                                                                                                                                                                                          | 9215910   |                    |                   |
| AT2G01570  | RGA                  | GRS RGA1                                                                                                                                          | Much reduced fertility compared to wild type Ler.                                                                                                                                                                                                                                                                                                                                                                                                                                                                                                                                                                                                                                                                                                                                                                                       | 9215910   |                    |                   |
| AT2G01570  | RGA                  | GRS RGA1                                                                                                                                          | Reduced pollen levels than wild type Ler and filaments shorter than carpels.                                                                                                                                                                                                                                                                                                                                                                                                                                                                                                                                                                                                                                                                                                                                                            | 9215910   |                    |                   |
| AT2G01570  | RGA                  | GRS RGA1                                                                                                                                          | Stems are 35% taller than that of wild type Ler.                                                                                                                                                                                                                                                                                                                                                                                                                                                                                                                                                                                                                                                                                                                                                                                        | 9215910   |                    |                   |
| AT2G01570  | RGA                  | GRS RGA1                                                                                                                                          | Early flowering.                                                                                                                                                                                                                                                                                                                                                                                                                                                                                                                                                                                                                                                                                                                                                                                                                        | 9215910   |                    |                   |
| AT2G01570  | RGA                  | GRS RGA1                                                                                                                                          | Longer carpels than those of the gal-3 single mutant.                                                                                                                                                                                                                                                                                                                                                                                                                                                                                                                                                                                                                                                                                                                                                                                   | 9215910   |                    |                   |
| AT2G01570  | RGA                  | GRS RGA1                                                                                                                                          | Stems are 32% taller than that of wild type Ler.                                                                                                                                                                                                                                                                                                                                                                                                                                                                                                                                                                                                                                                                                                                                                                                        | 9215910   |                    |                   |
| AT1G34790  |                      |                                                                                                                                                   | Early flowering compared to wild type.                                                                                                                                                                                                                                                                                                                                                                                                                                                                                                                                                                                                                                                                                                                                                                                                  | 9215910   |                    |                   |
| AT1G34790  |                      |                                                                                                                                                   | The initiation of abaxial trichomes occurs marginally earlier than those of wild type Ler.                                                                                                                                                                                                                                                                                                                                                                                                                                                                                                                                                                                                                                                                                                                                              | 9215910   |                    |                   |
| AT1G34790  |                      |                                                                                                                                                   | Much reduced fertility compared to wild type Ler.                                                                                                                                                                                                                                                                                                                                                                                                                                                                                                                                                                                                                                                                                                                                                                                       | 9215910   |                    |                   |
| AT1G34790  |                      |                                                                                                                                                   | Reduced pollen levels than wild type Ler and filaments shorter than carpels.                                                                                                                                                                                                                                                                                                                                                                                                                                                                                                                                                                                                                                                                                                                                                            | 9215910   |                    |                   |
| AT1G34790  |                      |                                                                                                                                                   | Stems are 35% taller than that of wild type Ler.                                                                                                                                                                                                                                                                                                                                                                                                                                                                                                                                                                                                                                                                                                                                                                                        | 9215910   |                    |                   |
| AT1G14920  | GAI                  | RGA2                                                                                                                                              | Early flowering compared to wild type.                                                                                                                                                                                                                                                                                                                                                                                                                                                                                                                                                                                                                                                                                                                                                                                                  | 9215910   |                    |                   |
| AT1G14920  | GAI                  | RGA2                                                                                                                                              | The initiation of abaxial trichomes occurs marginally earlier than those of wild type Ler.                                                                                                                                                                                                                                                                                                                                                                                                                                                                                                                                                                                                                                                                                                                                              | 9215910   |                    |                   |
| AT1G14920  | GAI                  | RGA2                                                                                                                                              | No bolting.                                                                                                                                                                                                                                                                                                                                                                                                                                                                                                                                                                                                                                                                                                                                                                                                                             | 9215910   |                    |                   |
| AT1G14920  | GAI                  | RGA2                                                                                                                                              | No increase of germination or restoration of male fertility compared to the single gal-3 mutant.                                                                                                                                                                                                                                                                                                                                                                                                                                                                                                                                                                                                                                                                                                                                        | 9215910   |                    |                   |
| AT1G14920  | GAI                  | RGA2                                                                                                                                              | Rescue of the nonflowering phenotype of gal-3.                                                                                                                                                                                                                                                                                                                                                                                                                                                                                                                                                                                                                                                                                                                                                                                          | 9215910   |                    |                   |
| AT1G14920  | GAI                  | RGA2                                                                                                                                              | Much reduced fertility compared to wild type Ler.                                                                                                                                                                                                                                                                                                                                                                                                                                                                                                                                                                                                                                                                                                                                                                                       | 9215910   |                    |                   |
| AT1G14920  | GAI                  | RGA2                                                                                                                                              | Reduced pollen levels than wild type Ler and filaments shorter than carpels.                                                                                                                                                                                                                                                                                                                                                                                                                                                                                                                                                                                                                                                                                                                                                            | 9215910   |                    |                   |
| AT1G14920  | GAI                  | RGA2                                                                                                                                              | Stems are 35% taller than that of wild type Ler.                                                                                                                                                                                                                                                                                                                                                                                                                                                                                                                                                                                                                                                                                                                                                                                        | 9215910   |                    |                   |
| AT1G14920  | GAI                  | RGA2                                                                                                                                              | Early flowering.                                                                                                                                                                                                                                                                                                                                                                                                                                                                                                                                                                                                                                                                                                                                                                                                                        | 9215910   |                    |                   |
| AT1G14920  | GAI                  | RGA2                                                                                                                                              | Longer carpels than those of the gal-3 single mutant.                                                                                                                                                                                                                                                                                                                                                                                                                                                                                                                                                                                                                                                                                                                                                                                   | 9215910   |                    |                   |
| AT1G14920  | GAI                  | RGA2                                                                                                                                              | Stems are 32% taller than that of wild type Ler.                                                                                                                                                                                                                                                                                                                                                                                                                                                                                                                                                                                                                                                                                                                                                                                        | 9215910   |                    |                   |
| AT2G02480  |                      |                                                                                                                                                   | Trichomes have two branch points.                                                                                                                                                                                                                                                                                                                                                                                                                                                                                                                                                                                                                                                                                                                                                                                                       | 9367433   |                    |                   |
| AT2G02480  |                      |                                                                                                                                                   | Partial suppression of the strong sti-EMU phenotype resulting in sti-like trichomes.                                                                                                                                                                                                                                                                                                                                                                                                                                                                                                                                                                                                                                                                                                                                                    | 9367433   |                    |                   |
| AT2G02480  |                      |                                                                                                                                                   | Trichomes have one branch point resting on a long stalk.                                                                                                                                                                                                                                                                                                                                                                                                                                                                                                                                                                                                                                                                                                                                                                                | 9367433   |                    |                   |
| AT2G02480  |                      |                                                                                                                                                   | Most trichomes do not develop any branch points.                                                                                                                                                                                                                                                                                                                                                                                                                                                                                                                                                                                                                                                                                                                                                                                        | 9367433   |                    |                   |
| AT2G02480  |                      |                                                                                                                                                   | Larger but unbranched trichome cells compared to wild type.                                                                                                                                                                                                                                                                                                                                                                                                                                                                                                                                                                                                                                                                                                                                                                             | 9367433   |                    |                   |
| AT1G01510  | AN                   | DOQ                                                                                                                                               | Reduced, but still significant, number of branched trichomes.                                                                                                                                                                                                                                                                                                                                                                                                                                                                                                                                                                                                                                                                                                                                                                           | 9367433   |                    |                   |
| AT1G01510  | AN                   | DOQ                                                                                                                                               | Trichomes have only one branch point.                                                                                                                                                                                                                                                                                                                                                                                                                                                                                                                                                                                                                                                                                                                                                                                                   | 9367433   |                    |                   |
| AT1G48410  | AGO1                 |                                                                                                                                                   | Heterozygous parents and progeny are indistinguishable from wild type.                                                                                                                                                                                                                                                                                                                                                                                                                                                                                                                                                                                                                                                                                                                                                                  | 9427751   | 1                  | 1                 |
| AT1G48410  | AGO1                 |                                                                                                                                                   | Homozygous progeny has unexpanded pointed cotyledons and very narrow rosette leaves.                                                                                                                                                                                                                                                                                                                                                                                                                                                                                                                                                                                                                                                                                                                                                    | 9427751   | 1                  | 1                 |
| AT1G48410  | AGO1                 |                                                                                                                                                   | The homozygous progeny is self-sterile.                                                                                                                                                                                                                                                                                                                                                                                                                                                                                                                                                                                                                                                                                                                                                                                                 | 9427751   | 1                  | 1                 |

|           |        |                                                                                                                                                                             |                                                                                                                                                                                                                                                                                                                                                                                                                                                                                                                                                                                                                                                                                                                                                                                                                                                                                                                                                                                                                                                                                                                                                                                                                                                                                                                                                                                                                                                                                                                                                                                                                                                                                                                                                                                                                                                                                                                                                                                                                                                                                  |          |   |   |
|-----------|--------|-----------------------------------------------------------------------------------------------------------------------------------------------------------------------------|----------------------------------------------------------------------------------------------------------------------------------------------------------------------------------------------------------------------------------------------------------------------------------------------------------------------------------------------------------------------------------------------------------------------------------------------------------------------------------------------------------------------------------------------------------------------------------------------------------------------------------------------------------------------------------------------------------------------------------------------------------------------------------------------------------------------------------------------------------------------------------------------------------------------------------------------------------------------------------------------------------------------------------------------------------------------------------------------------------------------------------------------------------------------------------------------------------------------------------------------------------------------------------------------------------------------------------------------------------------------------------------------------------------------------------------------------------------------------------------------------------------------------------------------------------------------------------------------------------------------------------------------------------------------------------------------------------------------------------------------------------------------------------------------------------------------------------------------------------------------------------------------------------------------------------------------------------------------------------------------------------------------------------------------------------------------------------|----------|---|---|
| AT1G02580 | MEA    | EMB173 EMBRYO DEFECTIVE 173 FIS1 MEDEA SDG5                                                                                                                                 | In the homozygous progeny: During early stages of embryogenesis the development of mea-1 embryos is indistinguishable from wild-type siblings in cleared or sectioned specimens. Visible differences between wild-type and mea-1 embryos began at the late globular stage. Globular mea-1 embryos show excess cell proliferation and enlarge radially symmetrical. When wild-type embryos reach the mid to late heart stage, sibling mea-1 embryos are still globular and contain small vacuolated cells with curvilinear cell walls and sometimes irregular cell divisions in the ground tissue and procambium. Suspensor and hypophysis are normal, and cotyledons initiate synchronously as in the wild type. Thus, despite increased cell proliferation and occasional irregular cytokinesis, morphogenetic progression is normal. However, each stage is prolonged and includes more division cycles, and morphogenesis is delayed. As a consequence, giant heart stage mea-1 embryos are present along with late torpedo or cotyledonary stage wild-type embryos. mea-1 heart stage embryos have supernumerary cell layers. When wild-type siblings are fully differentiated, most mea-1 embryos have reached the late heart stage and are up to 10 times larger than normal. mea embryos degenerate during desiccation. These results suggest that mea controls cell proliferation during embryogenesis, allowing morphogenesis to progress normally, albeit slowly. Endosperm development in mea-1 seeds is indistinguishable from that of the wild type at early stages. When cellularization begins normally in wild-type seeds at the transition from the globular to the heart stage, no cellularization is observed in sibling mea-1 seeds. Although nuclear divisions take place more slowly in mea-1 endosperm, the distribution of endosperm nuclei is as in the wild type. Partial cellularization occurs at the micropyle when mea-1 embryos reach the late heart stage in desiccating seeds, but because fewer nuclei have been generated, most of the centra | 9545225  | 3 | 3 |
| AT1G02580 | MEA    | EMB173 EMBRYO DEFECTIVE 173 FIS1 MEDEA SDG5                                                                                                                                 | The homozygous progeny is embryo-lethal.                                                                                                                                                                                                                                                                                                                                                                                                                                                                                                                                                                                                                                                                                                                                                                                                                                                                                                                                                                                                                                                                                                                                                                                                                                                                                                                                                                                                                                                                                                                                                                                                                                                                                                                                                                                                                                                                                                                                                                                                                                         | 9545225  | 1 | 1 |
| AT1G02580 | MEA    | EMB173 EMBRYO DEFECTIVE 173 FIS1 MEDEA SDG5                                                                                                                                 | Similar to non-revertant mea-1 mutant.                                                                                                                                                                                                                                                                                                                                                                                                                                                                                                                                                                                                                                                                                                                                                                                                                                                                                                                                                                                                                                                                                                                                                                                                                                                                                                                                                                                                                                                                                                                                                                                                                                                                                                                                                                                                                                                                                                                                                                                                                                           | 9545225  | 1 | 1 |
| AT1G08550 | NPQ1   | ARABIDOPSIS VIOLAXANTHIN DE-EPOXIDASE 1; AVDE1; P22013.3; P22013.3; non-photochemical quenching 1; VIOLAXANTHIN DE-EPOXIDASE PRECURSOR                                      | altered nonphotochemical quenching of chlorophyll fluorescence; unable to convert violaxanthin to zeaxanthin in excessive light via the xanthophyll cycle; affects the structural gene encoding violaxanthin deoxygenase; exhibits greatly reduced nonphotochemical quenching, demonstrating that violaxanthin deoxygenation is required for the bulk of rapidly reversible nonphotochemical quenching; altered regulation of photosynthetic energy conversion is associated with increased sensitivity to photoinhibition.                                                                                                                                                                                                                                                                                                                                                                                                                                                                                                                                                                                                                                                                                                                                                                                                                                                                                                                                                                                                                                                                                                                                                                                                                                                                                                                                                                                                                                                                                                                                                      | 9668132  | 5 | 0 |
| AT1G08550 | NPQ1   | ARABIDOPSIS VIOLAXANTHIN DE-EPOXIDASE 1; AVDE1; P22013.3; P22013.3; non-photochemical quenching 1; VIOLAXANTHIN DE-EPOXIDASE PRECURSOR                                      | Mutants does not convert violaxanthin to antheraxanthin and zeaxanthin during exposure to high light.                                                                                                                                                                                                                                                                                                                                                                                                                                                                                                                                                                                                                                                                                                                                                                                                                                                                                                                                                                                                                                                                                                                                                                                                                                                                                                                                                                                                                                                                                                                                                                                                                                                                                                                                                                                                                                                                                                                                                                            | 9668132  | 1 | 0 |
| AT1G52340 | ABA2   | GIN1 IS14 SAN3 SDR1 SIS4 SRE1                                                                                                                                               | Adult plants wilt under desiccating conditions.                                                                                                                                                                                                                                                                                                                                                                                                                                                                                                                                                                                                                                                                                                                                                                                                                                                                                                                                                                                                                                                                                                                                                                                                                                                                                                                                                                                                                                                                                                                                                                                                                                                                                                                                                                                                                                                                                                                                                                                                                                  | 9787459  |   |   |
| AT1G52340 | ABA2   | GIN1 IS14 SAN3 SDR1 SIS4 SRE1                                                                                                                                               | After bolting, the wilted phenotype became evident in the shoot apex, cauline leaves and immature siliques of this mutant. This phenotype was partially restored by application of 10 $\mu$ M ABA to rosette leaves.                                                                                                                                                                                                                                                                                                                                                                                                                                                                                                                                                                                                                                                                                                                                                                                                                                                                                                                                                                                                                                                                                                                                                                                                                                                                                                                                                                                                                                                                                                                                                                                                                                                                                                                                                                                                                                                             | 9787459  |   |   |
| AT1G52340 | ABA2   | GIN1 IS14 SAN3 SDR1 SIS4 SRE1                                                                                                                                               | Endogenous ABA levels in fresh and dehydrated tissues of the mutant were about 23% and 2.4%, respectively, of those of the wild type plants.                                                                                                                                                                                                                                                                                                                                                                                                                                                                                                                                                                                                                                                                                                                                                                                                                                                                                                                                                                                                                                                                                                                                                                                                                                                                                                                                                                                                                                                                                                                                                                                                                                                                                                                                                                                                                                                                                                                                     | 9787459  |   |   |
| AT1G52340 | ABA2   | GIN1 IS14 SAN3 SDR1 SIS4 SRE1                                                                                                                                               | Endogenous levels of 12 amino acids were at least 2-fold greater in wild-type than in the mutant plants after 18 h dehydration. Amino acids that exhibited marked increases were leucine (152-fold), isoleucine (95-fold), proline (83-fold) and valine (25-fold). Aspartic acid was the only amino acid which showed a significant reduction in wild-type plants during dehydration. In dehydrated tissues of the mutant, 9 amino acids increased more than 2-fold during dehydration, however the increases in the mutant plants were less pronounced than those in wild-type plants. Glycine and alanine showed greater increases in comparison to wild type, whereas the levels of glutamic acid and aspartic acid showed a reduction in the mutant during dehydration.                                                                                                                                                                                                                                                                                                                                                                                                                                                                                                                                                                                                                                                                                                                                                                                                                                                                                                                                                                                                                                                                                                                                                                                                                                                                                                      | 9787459  |   |   |
| AT1G52340 | ABA2   | GIN1 IS14 SAN3 SDR1 SIS4 SRE1                                                                                                                                               | Free amino acid levels in fresh tissues of the mutant plants at 30 DAI were similar to those in wild type, however the level of proline in the mutant plants was 4-fold higher than that in wild type.                                                                                                                                                                                                                                                                                                                                                                                                                                                                                                                                                                                                                                                                                                                                                                                                                                                                                                                                                                                                                                                                                                                                                                                                                                                                                                                                                                                                                                                                                                                                                                                                                                                                                                                                                                                                                                                                           | 9787459  |   |   |
| AT1G52340 | ABA2   | GIN1 IS14 SAN3 SDR1 SIS4 SRE1                                                                                                                                               | Seeds have a reduced dormancy.                                                                                                                                                                                                                                                                                                                                                                                                                                                                                                                                                                                                                                                                                                                                                                                                                                                                                                                                                                                                                                                                                                                                                                                                                                                                                                                                                                                                                                                                                                                                                                                                                                                                                                                                                                                                                                                                                                                                                                                                                                                   | 9787459  |   |   |
| AT1G52340 | ABA2   | GIN1 IS14 SAN3 SDR1 SIS4 SRE1                                                                                                                                               | The mutant embryos are morphologically normal, although mature embryos are more yellow compared to white wild-type embryos.                                                                                                                                                                                                                                                                                                                                                                                                                                                                                                                                                                                                                                                                                                                                                                                                                                                                                                                                                                                                                                                                                                                                                                                                                                                                                                                                                                                                                                                                                                                                                                                                                                                                                                                                                                                                                                                                                                                                                      | 9787459  |   |   |
| AT1G52340 | ABA2   | GIN1 IS14 SAN3 SDR1 SIS4 SRE1                                                                                                                                               | The mutant has smaller rosette leaves and mature plants are not yellowish as has been reported for aba1 mutants.                                                                                                                                                                                                                                                                                                                                                                                                                                                                                                                                                                                                                                                                                                                                                                                                                                                                                                                                                                                                                                                                                                                                                                                                                                                                                                                                                                                                                                                                                                                                                                                                                                                                                                                                                                                                                                                                                                                                                                 | 9787459  |   |   |
| AT1G52340 | ABA2   | GIN1 IS14 SAN3 SDR1 SIS4 SRE1                                                                                                                                               | Under the reported growth conditions, approximately 10% of the dark germinated seedlings of the mutant produced true leaves. The dark germinated seedlings of the mutant did not show further growth even after a prolonged period of darkness.                                                                                                                                                                                                                                                                                                                                                                                                                                                                                                                                                                                                                                                                                                                                                                                                                                                                                                                                                                                                                                                                                                                                                                                                                                                                                                                                                                                                                                                                                                                                                                                                                                                                                                                                                                                                                                  | 9787459  |   |   |
| AT1G02090 | FUS5   | ATCSN7 COP15 COP9 SIGNALOSOME SUBUNIT 7 CSN7 FUSCA 5                                                                                                                        | Dark-grown mutants exhibit short hypocotyls and open, expanded cotyledons similar to light-grown mutant and wild-type seedlings, and accumulate high levels of anthocyanin. In addition, mutants develop chloroplasts in the dark, express high levels of light-inducible genes, although grown in darkness, and die after the seedling stage in light and darkness.                                                                                                                                                                                                                                                                                                                                                                                                                                                                                                                                                                                                                                                                                                                                                                                                                                                                                                                                                                                                                                                                                                                                                                                                                                                                                                                                                                                                                                                                                                                                                                                                                                                                                                             | 10330469 | 2 | 1 |
| AT1G02090 | FUS5   | ATCSN7 COP15 COP9 SIGNALOSOME SUBUNIT 7 CSN7 FUSCA 5                                                                                                                        | In the homozygous progeny, dark purple seeds.                                                                                                                                                                                                                                                                                                                                                                                                                                                                                                                                                                                                                                                                                                                                                                                                                                                                                                                                                                                                                                                                                                                                                                                                                                                                                                                                                                                                                                                                                                                                                                                                                                                                                                                                                                                                                                                                                                                                                                                                                                    | 10330469 | 1 | 1 |
| AT1G02090 | FUS5   | ATCSN7 COP15 COP9 SIGNALOSOME SUBUNIT 7 CSN7 FUSCA 5                                                                                                                        | Mutation is lethal in the homozygous state.                                                                                                                                                                                                                                                                                                                                                                                                                                                                                                                                                                                                                                                                                                                                                                                                                                                                                                                                                                                                                                                                                                                                                                                                                                                                                                                                                                                                                                                                                                                                                                                                                                                                                                                                                                                                                                                                                                                                                                                                                                      | 10330469 | 1 | 0 |
| AT1G02090 | FUS5   | ATCSN7 COP15 COP9 SIGNALOSOME SUBUNIT 7 CSN7 FUSCA 5                                                                                                                        | In the homozygous progeny, anthocyanin accumulation (purple coloration) in the cotyledons of developing embryos.                                                                                                                                                                                                                                                                                                                                                                                                                                                                                                                                                                                                                                                                                                                                                                                                                                                                                                                                                                                                                                                                                                                                                                                                                                                                                                                                                                                                                                                                                                                                                                                                                                                                                                                                                                                                                                                                                                                                                                 | 10330469 | 1 | 1 |
| AT1G75010 | ARC3   |                                                                                                                                                                             | Defective in chloroplast accumulation and division. Reduced number of chloroplasts and affected division plane in chloroplast biogenesis. Highly elongated and multiple arrayed chloroplasts in developing green tissues. Mutant proteins do not form homodimers, as wt proteins do, and localize aberrantly inside chloroplasts.                                                                                                                                                                                                                                                                                                                                                                                                                                                                                                                                                                                                                                                                                                                                                                                                                                                                                                                                                                                                                                                                                                                                                                                                                                                                                                                                                                                                                                                                                                                                                                                                                                                                                                                                                | 10417716 | 4 | 3 |
| AT1G22770 | GI     |                                                                                                                                                                             | Delayed flowering.                                                                                                                                                                                                                                                                                                                                                                                                                                                                                                                                                                                                                                                                                                                                                                                                                                                                                                                                                                                                                                                                                                                                                                                                                                                                                                                                                                                                                                                                                                                                                                                                                                                                                                                                                                                                                                                                                                                                                                                                                                                               | 10469647 | 1 | 1 |
| AT1G69180 |        |                                                                                                                                                                             | Development of ectopic ovules with random distribution: 1 to 10 per gynoceum.                                                                                                                                                                                                                                                                                                                                                                                                                                                                                                                                                                                                                                                                                                                                                                                                                                                                                                                                                                                                                                                                                                                                                                                                                                                                                                                                                                                                                                                                                                                                                                                                                                                                                                                                                                                                                                                                                                                                                                                                    | 10535738 |   |   |
| AT1G69180 |        |                                                                                                                                                                             | Grow more slowly than wild type, flower 10-14 days later, have reduced organ sizes, exhibit slight epinasty of their leaves and flowers, and display reduced apical dominance.                                                                                                                                                                                                                                                                                                                                                                                                                                                                                                                                                                                                                                                                                                                                                                                                                                                                                                                                                                                                                                                                                                                                                                                                                                                                                                                                                                                                                                                                                                                                                                                                                                                                                                                                                                                                                                                                                                   | 10535738 |   |   |
| AT1G69180 |        |                                                                                                                                                                             | In double mutant carpels, two rows of primordia arise, extending along the length of the ovary, most of which subsequently develop into ovules (mostly morphologically abnormal).                                                                                                                                                                                                                                                                                                                                                                                                                                                                                                                                                                                                                                                                                                                                                                                                                                                                                                                                                                                                                                                                                                                                                                                                                                                                                                                                                                                                                                                                                                                                                                                                                                                                                                                                                                                                                                                                                                | 10535738 |   |   |
| AT1G01040 | DCL1   | ABNORMAL SUSPENSOR 1 ASU1 ATDCL1 CAP CARPEL FACTORY DICER-LIKE 1 dicer-like 1 EMB60 EMB76 EMBRYO DEFECTIVE 60 EMBRYO DEFECTIVE 76 SHORT INTEGUMENTS 1 SIN1 SUS1 SUSPENSOR 1 | indeterminate floral meristems, producing extra whorls of stamens and an indefinite number of carpels; unregulated cell division in the center of the flower with normal floral organ identity; plants also show other developmental defects including absence of axillary inflorescence meristems and abnormally shaped cotyledons, leaves, sepals, stamens and carpels                                                                                                                                                                                                                                                                                                                                                                                                                                                                                                                                                                                                                                                                                                                                                                                                                                                                                                                                                                                                                                                                                                                                                                                                                                                                                                                                                                                                                                                                                                                                                                                                                                                                                                         | 10556049 |   |   |
| AT2G02480 |        |                                                                                                                                                                             | Exclusively produces unbranched trichomes.                                                                                                                                                                                                                                                                                                                                                                                                                                                                                                                                                                                                                                                                                                                                                                                                                                                                                                                                                                                                                                                                                                                                                                                                                                                                                                                                                                                                                                                                                                                                                                                                                                                                                                                                                                                                                                                                                                                                                                                                                                       | 10572032 |   |   |
| AT1G80350 | KATNA1 |                                                                                                                                                                             | Although more than 60% of the double mutant have two trichome branches, at least 30% are unbranched.                                                                                                                                                                                                                                                                                                                                                                                                                                                                                                                                                                                                                                                                                                                                                                                                                                                                                                                                                                                                                                                                                                                                                                                                                                                                                                                                                                                                                                                                                                                                                                                                                                                                                                                                                                                                                                                                                                                                                                             | 10572032 |   |   |
| AT1G80350 | KATNA1 |                                                                                                                                                                             | About 60% of the trichomes are two-branched.                                                                                                                                                                                                                                                                                                                                                                                                                                                                                                                                                                                                                                                                                                                                                                                                                                                                                                                                                                                                                                                                                                                                                                                                                                                                                                                                                                                                                                                                                                                                                                                                                                                                                                                                                                                                                                                                                                                                                                                                                                     | 10572032 |   |   |
| AT1G80350 | KATNA1 |                                                                                                                                                                             | Decreased fertility compared to wild type.                                                                                                                                                                                                                                                                                                                                                                                                                                                                                                                                                                                                                                                                                                                                                                                                                                                                                                                                                                                                                                                                                                                                                                                                                                                                                                                                                                                                                                                                                                                                                                                                                                                                                                                                                                                                                                                                                                                                                                                                                                       | 10572032 |   |   |
| AT1G80350 | KATNA1 |                                                                                                                                                                             | Reduced trichome branching                                                                                                                                                                                                                                                                                                                                                                                                                                                                                                                                                                                                                                                                                                                                                                                                                                                                                                                                                                                                                                                                                                                                                                                                                                                                                                                                                                                                                                                                                                                                                                                                                                                                                                                                                                                                                                                                                                                                                                                                                                                       | 10572032 |   |   |
| AT1G80350 | KATNA1 |                                                                                                                                                                             | Predominantly produces unbranched trichomes.                                                                                                                                                                                                                                                                                                                                                                                                                                                                                                                                                                                                                                                                                                                                                                                                                                                                                                                                                                                                                                                                                                                                                                                                                                                                                                                                                                                                                                                                                                                                                                                                                                                                                                                                                                                                                                                                                                                                                                                                                                     | 10572032 |   |   |
| AT1G80350 | KATNA1 |                                                                                                                                                                             | Grows more slowly than wild type; produces abnormally short and bushy bolts at the time of flowering.                                                                                                                                                                                                                                                                                                                                                                                                                                                                                                                                                                                                                                                                                                                                                                                                                                                                                                                                                                                                                                                                                                                                                                                                                                                                                                                                                                                                                                                                                                                                                                                                                                                                                                                                                                                                                                                                                                                                                                            | 10572032 |   |   |
| AT1G80350 | KATNA1 |                                                                                                                                                                             | Double mutant has approximately the same proportion of two-branched and unbranched trichomes as the gl-3 single mutant.                                                                                                                                                                                                                                                                                                                                                                                                                                                                                                                                                                                                                                                                                                                                                                                                                                                                                                                                                                                                                                                                                                                                                                                                                                                                                                                                                                                                                                                                                                                                                                                                                                                                                                                                                                                                                                                                                                                                                          | 10572032 |   |   |
| AT1G80350 | KATNA1 |                                                                                                                                                                             | Double mutants have more trichome branches than frc single mutant but fewer than nok single mutant.                                                                                                                                                                                                                                                                                                                                                                                                                                                                                                                                                                                                                                                                                                                                                                                                                                                                                                                                                                                                                                                                                                                                                                                                                                                                                                                                                                                                                                                                                                                                                                                                                                                                                                                                                                                                                                                                                                                                                                              | 10572032 |   |   |
| AT1G80350 | KATNA1 |                                                                                                                                                                             | Produces mostly two-branched trichomes.                                                                                                                                                                                                                                                                                                                                                                                                                                                                                                                                                                                                                                                                                                                                                                                                                                                                                                                                                                                                                                                                                                                                                                                                                                                                                                                                                                                                                                                                                                                                                                                                                                                                                                                                                                                                                                                                                                                                                                                                                                          | 10572032 |   |   |
| AT1G80350 | KATNA1 |                                                                                                                                                                             | Exclusively produces unbranched trichomes.                                                                                                                                                                                                                                                                                                                                                                                                                                                                                                                                                                                                                                                                                                                                                                                                                                                                                                                                                                                                                                                                                                                                                                                                                                                                                                                                                                                                                                                                                                                                                                                                                                                                                                                                                                                                                                                                                                                                                                                                                                       | 10572032 |   |   |
| AT1G80350 | KATNA1 |                                                                                                                                                                             | Produces less two-branched trichomes (~40%) than the frc single mutant.                                                                                                                                                                                                                                                                                                                                                                                                                                                                                                                                                                                                                                                                                                                                                                                                                                                                                                                                                                                                                                                                                                                                                                                                                                                                                                                                                                                                                                                                                                                                                                                                                                                                                                                                                                                                                                                                                                                                                                                                          | 10572032 |   |   |
| AT1G01510 | AN     | DOQ                                                                                                                                                                         | Predominantly produces unbranched trichomes.                                                                                                                                                                                                                                                                                                                                                                                                                                                                                                                                                                                                                                                                                                                                                                                                                                                                                                                                                                                                                                                                                                                                                                                                                                                                                                                                                                                                                                                                                                                                                                                                                                                                                                                                                                                                                                                                                                                                                                                                                                     | 10572032 |   |   |
| AT1G44575 |        |                                                                                                                                                                             | The mutant is defective specifically in the qE component of NPQ. However, it exhibits zeaxanthin synthesis in high light that is indistinguishable in extent and kinetics from that of the wild type.                                                                                                                                                                                                                                                                                                                                                                                                                                                                                                                                                                                                                                                                                                                                                                                                                                                                                                                                                                                                                                                                                                                                                                                                                                                                                                                                                                                                                                                                                                                                                                                                                                                                                                                                                                                                                                                                            | 10667783 |   |   |

|           |        |                                                                                                   |                                                                                                                                                                                                                                                                                                                                                                                                                                                                                          |          |   |   |
|-----------|--------|---------------------------------------------------------------------------------------------------|------------------------------------------------------------------------------------------------------------------------------------------------------------------------------------------------------------------------------------------------------------------------------------------------------------------------------------------------------------------------------------------------------------------------------------------------------------------------------------------|----------|---|---|
| AT1G24260 | SEP3   | AGAMOUS-like 9; AGL9; F316.19; F316.19; SEPALLATA3; TRANSCRIPTION FACTOR AGL9                     | All flower organs resemble sepals. The second whorl has four green sepal-like organs (instead of four white petals) which are differentiated of interspersed stomata and the conversion of nearly all of the cells into sepal cells. Sepals replace stamens in the third whorl. The fourth whorl is a reiteration of whorls 1, 2 and 3.                                                                                                                                                  | 10821278 | 1 | 1 |
| AT1G02340 | HFR1   | FB11 LONG HYPOCOTYL IN FAR-RED REP1 RSF1                                                          | Fluence response curves in both R and FR light confirmed that rsf1 seedlings responded normally to R light and are less sensitive to all the tested fluences of FR light. However, unlike phyA null mutants (phy-211), they clearly responded to increasing fluences of FR light.                                                                                                                                                                                                        | 10982420 | 1 | 0 |
| AT1G02340 | HFR1   | FB11 LONG HYPOCOTYL IN FAR-RED REP1 RSF1                                                          | Hypocotyl elongation is less inhibited than in wild-type plants in both FR and blue light. Hypocotyl length in rsf1 seedlings was intermediate between the wild type and a photoreceptor null mutant under both light conditions.                                                                                                                                                                                                                                                        | 10982420 | 1 | 0 |
| AT1G02340 | HFR1   | FB11 LONG HYPOCOTYL IN FAR-RED REP1 RSF1                                                          | In short days (SD), flowering time is unaffected. rsf1 plants were indistinguishable from wild type both in LD and SD using two criteria to measure flowering time (days until flowering and leaf number at flowering).                                                                                                                                                                                                                                                                  | 10982420 | 1 | 0 |
| AT1G02340 | HFR1   | FB11 LONG HYPOCOTYL IN FAR-RED REP1 RSF1                                                          | rsf1 mutants accumulated slightly, but significantly lower, levels of anthocyanins than the wild type.                                                                                                                                                                                                                                                                                                                                                                                   | 10982420 | 1 | 0 |
| AT1G48410 | AGO1   |                                                                                                   | The homozygous progeny has unexpanded cotyledons, narrow leaves, and a unique stem with abnormal inflorescences bearing infertile flowers.                                                                                                                                                                                                                                                                                                                                               | 11016954 | 1 | 1 |
| AT1G48410 | AGO1   |                                                                                                   | The homozygous progeny is self-sterile.                                                                                                                                                                                                                                                                                                                                                                                                                                                  | 11016954 |   |   |
| AT1G65620 | LDB6   | AS2                                                                                               | asymmetric and lobed rosette leaves, leaf edges curl under irregularly.                                                                                                                                                                                                                                                                                                                                                                                                                  | 11076771 |   |   |
| AT2G01830 | WOL    | AHK4 ARABIDOPSIS HISTIDINE KINASE 4 ATCRE1 CRE1 CYTOKININ RESPONSE 1 WOL1 WOODEN LEG WOODEN LEG 1 | Absence of periclinal cell divisions in the primary root meristem.                                                                                                                                                                                                                                                                                                                                                                                                                       | 11114883 | 1 | 1 |
| AT2G01830 | WOL    | AHK4 ARABIDOPSIS HISTIDINE KINASE 4 ATCRE1 CRE1 CYTOKININ RESPONSE 1 WOL1 WOODEN LEG WOODEN LEG 1 | Decreased number of vascular initials.                                                                                                                                                                                                                                                                                                                                                                                                                                                   | 11114883 | 1 | 1 |
| AT2G01830 | WOL    | AHK4 ARABIDOPSIS HISTIDINE KINASE 4 ATCRE1 CRE1 CYTOKININ RESPONSE 1 WOL1 WOODEN LEG WOODEN LEG 1 | Defect in cell division in the root and lower hypocotyl region soon after the embryo torpedo stage.                                                                                                                                                                                                                                                                                                                                                                                      | 11114883 | 1 | 1 |
| AT2G01830 | WOL    | AHK4 ARABIDOPSIS HISTIDINE KINASE 4 ATCRE1 CRE1 CYTOKININ RESPONSE 1 WOL1 WOODEN LEG WOODEN LEG 1 | Reduced cell number and exclusive xylem differentiation within the root vasculature.                                                                                                                                                                                                                                                                                                                                                                                                     | 11114883 | 2 | 2 |
| AT1G09700 | HYL1   | ATDRB1 DRB1 DSRNA-BINDING PROTEIN 1 HYPONASTIC LEAVES 1                                           | Altered vegetative morphology and response to hormones                                                                                                                                                                                                                                                                                                                                                                                                                                   | 11148283 | 1 | 1 |
| AT2G01830 | WOL    | AHK4 ARABIDOPSIS HISTIDINE KINASE 4 ATCRE1 CRE1 CYTOKININ RESPONSE 1 WOL1 WOODEN LEG WOODEN LEG 1 | Resistant to cytokinin in root elongation assay and in callus growth and shoot formation assays.                                                                                                                                                                                                                                                                                                                                                                                         | 11234017 | 1 | 0 |
| AT1G65260 | PTAC4  | plastid transcriptionally active 4; TSP5.2; TSP5.2; VESICLE-INDUCING PROTEIN IN PLASTIDS 1; VIPP1 | deficient in photosynthesis, thylakoid membrane system degraded.                                                                                                                                                                                                                                                                                                                                                                                                                         | 11274447 | 1 | 0 |
| AT1G69770 | CMT1   | chromomethylase 1; CHROMOMETHYLASE 1; DMT4; DNA METHYLTRANSFERASE 4; P23A5.9; P23A5.9             | Wild type morphology; exhibits decreased CpXpG methylation of the Superman (SUP) gene and of other sequences throughout the genome; also show reactivated expression of endogenous retrotransposon sequences; encodes a cytosine methyltransferase homolog.                                                                                                                                                                                                                              | 11349138 | 4 | 4 |
| AT1G69770 | CMT1   | chromomethylase 1; CHROMOMETHYLASE 1; DMT4; DNA METHYLTRANSFERASE 4; P23A5.9; P23A5.9             | Derepression of SUP gene silencing (induced by clk-st), leading to plants with a wildtype floral phenotype.                                                                                                                                                                                                                                                                                                                                                                              | 11349138 | 1 | 1 |
| AT1G69770 | CMT1   | chromomethylase 1; CHROMOMETHYLASE 1; DMT4; DNA METHYLTRANSFERASE 4; P23A5.9; P23A5.9             | Partial derepression of SUP gene silencing (induced by clk-st), leading to plants with a wildtype floral phenotype.                                                                                                                                                                                                                                                                                                                                                                      | 11349138 | 1 | 1 |
| AT1G69770 | CMT1   | chromomethylase 1; CHROMOMETHYLASE 1; DMT4; DNA METHYLTRANSFERASE 4; P23A5.9; P23A5.9             | Methylation pattern similar to that observed with the cmt3-7 mutant.                                                                                                                                                                                                                                                                                                                                                                                                                     | 11349138 | 1 | 1 |
| AT2G01830 | WOL    | AHK4 ARABIDOPSIS HISTIDINE KINASE 4 ATCRE1 CRE1 CYTOKININ RESPONSE 1 WOL1 WOODEN LEG WOODEN LEG 1 | Growth severely affected during reproductive growth phase: onset of flowering varies with each individual plant.                                                                                                                                                                                                                                                                                                                                                                         | 11479382 |   |   |
| AT2G01830 | WOL    | AHK4 ARABIDOPSIS HISTIDINE KINASE 4 ATCRE1 CRE1 CYTOKININ RESPONSE 1 WOL1 WOODEN LEG WOODEN LEG 1 | Leaf shape slightly altered: longitudinal length of blade more affected than lateral length. Impaired leaf vasculature.                                                                                                                                                                                                                                                                                                                                                                  | 11479382 |   |   |
| AT2G01830 | WOL    | AHK4 ARABIDOPSIS HISTIDINE KINASE 4 ATCRE1 CRE1 CYTOKININ RESPONSE 1 WOL1 WOODEN LEG WOODEN LEG 1 | Leaves expand more slowly than those of wildtype controls.                                                                                                                                                                                                                                                                                                                                                                                                                               | 11479382 |   |   |
| AT2G01830 | WOL    | AHK4 ARABIDOPSIS HISTIDINE KINASE 4 ATCRE1 CRE1 CYTOKININ RESPONSE 1 WOL1 WOODEN LEG WOODEN LEG 1 | Postembryonic growth of roots (primary and lateral) severely impaired.                                                                                                                                                                                                                                                                                                                                                                                                                   | 11479382 |   |   |
| AT2G01830 | WOL    | AHK4 ARABIDOPSIS HISTIDINE KINASE 4 ATCRE1 CRE1 CYTOKININ RESPONSE 1 WOL1 WOODEN LEG WOODEN LEG 1 | Reduced seedling size with small cotyledons, slightly shortened hypocotyls (65% of wildtype) and significantly reduced root length.                                                                                                                                                                                                                                                                                                                                                      | 11479382 |   |   |
| AT2G01830 | WOL    | AHK4 ARABIDOPSIS HISTIDINE KINASE 4 ATCRE1 CRE1 CYTOKININ RESPONSE 1 WOL1 WOODEN LEG WOODEN LEG 1 | Addition of IAA to the medium completely inhibits root elongation, indicating normal auxin responsiveness.                                                                                                                                                                                                                                                                                                                                                                               | 11479382 |   |   |
| AT2G01830 | WOL    | AHK4 ARABIDOPSIS HISTIDINE KINASE 4 ATCRE1 CRE1 CYTOKININ RESPONSE 1 WOL1 WOODEN LEG WOODEN LEG 1 | No significant phenotype in shoot organs.                                                                                                                                                                                                                                                                                                                                                                                                                                                | 11479382 |   |   |
| AT2G01830 | WOL    | AHK4 ARABIDOPSIS HISTIDINE KINASE 4 ATCRE1 CRE1 CYTOKININ RESPONSE 1 WOL1 WOODEN LEG WOODEN LEG 1 | Root elongation not severely inhibited by cytokinins.                                                                                                                                                                                                                                                                                                                                                                                                                                    | 11479382 |   |   |
| AT1G27320 | AHK3   | ORE12                                                                                             | Strong cytokinin-insensitive phenotype.                                                                                                                                                                                                                                                                                                                                                                                                                                                  | 11479382 |   |   |
| AT1G27320 | AHK3   | ORE12                                                                                             | Growth severely affected during reproductive growth phase: onset of flowering varies with each individual plant.                                                                                                                                                                                                                                                                                                                                                                         | 11479382 |   |   |
| AT1G27320 | AHK3   | ORE12                                                                                             | Leaf shape slightly altered: longitudinal length of blade more affected than lateral length. Impaired leaf vasculature.                                                                                                                                                                                                                                                                                                                                                                  | 11479382 |   |   |
| AT1G27320 | AHK3   | ORE12                                                                                             | Leaves expand more slowly than those of wildtype controls.                                                                                                                                                                                                                                                                                                                                                                                                                               | 11479382 |   |   |
| AT1G27320 | AHK3   | ORE12                                                                                             | Postembryonic growth of roots (primary and lateral) severely impaired.                                                                                                                                                                                                                                                                                                                                                                                                                   | 11479382 |   |   |
| AT1G27320 | AHK3   | ORE12                                                                                             | Reduced seedling size with small cotyledons, slightly shortened hypocotyls (65% of wildtype) and significantly reduced root length.                                                                                                                                                                                                                                                                                                                                                      | 11479382 |   |   |
| AT1G10760 | SEX1   | GWD; GWD1; SOP; SOP1; STARCH EXCESS 1; T16B5.10; T16B5.10                                         | Glucose 3-phosphate level is about one-fourth of that of wild type.                                                                                                                                                                                                                                                                                                                                                                                                                      | 11487701 | 1 | 0 |
| AT1G10760 | SEX1   | GWD; GWD1; SOP; SOP1; STARCH EXCESS 1; T16B5.10; T16B5.10                                         | Glucose 6-phosphate level is about one-fourth of that of wild type.                                                                                                                                                                                                                                                                                                                                                                                                                      | 11487701 | 1 | 0 |
| AT1G10760 | SEX1   | GWD; GWD1; SOP; SOP1; STARCH EXCESS 1; T16B5.10; T16B5.10                                         | Slight increase in the number of short chains (DP 10 to 24) and decrease in that of longer chains (DP 31 to 46) in mutant starch.                                                                                                                                                                                                                                                                                                                                                        | 11487701 | 1 | 0 |
| AT1G10760 | SEX1   | GWD; GWD1; SOP; SOP1; STARCH EXCESS 1; T16B5.10; T16B5.10                                         | starch overproducer.                                                                                                                                                                                                                                                                                                                                                                                                                                                                     | 11487701 | 1 | 1 |
| AT1G10760 | SEX1   | GWD; GWD1; SOP; SOP1; STARCH EXCESS 1; T16B5.10; T16B5.10                                         | Glucose 6-phosphate level is below detection limits.                                                                                                                                                                                                                                                                                                                                                                                                                                     | 11487701 | 1 | 0 |
| AT1G10760 | SEX1   | GWD; GWD1; SOP; SOP1; STARCH EXCESS 1; T16B5.10; T16B5.10                                         | Glucose 3-phosphate level is below detection limits.                                                                                                                                                                                                                                                                                                                                                                                                                                     | 11487701 | 1 | 0 |
| AT1G10760 | SEX1   | GWD; GWD1; SOP; SOP1; STARCH EXCESS 1; T16B5.10; T16B5.10                                         | Glucose 6-phosphate levels are very close to the detection limits. It can therefore not be excluded that a low residual Glc6P content is present.                                                                                                                                                                                                                                                                                                                                        | 11487701 | 1 | 0 |
| AT1G74310 | HSP101 | ATHSP101 heat shock protein 101 HEAT SHOCK PROTEIN ATHSP101 HSP101                                | Defective in acquired thermotolerance. Plant growth and development, seed set and fertility, and germination of harvested seeds are the same as wild type in the absence of stress (normal growth conditions).                                                                                                                                                                                                                                                                           | 11489180 | 3 | 3 |
| AT1G03475 | CPX1   | CPO HEMF HEMF1 LIN2                                                                               | Plant have pale green leaves and develop lesions on the young leaves. Lesions begin as a small spot or stripe of collapsed tissue usually appearing in the middle part of the young leaves.                                                                                                                                                                                                                                                                                              | 11489187 | 1 | 1 |
| AT1G69180 |        |                                                                                                   | Ectopic adaxial tissues are restricted to the medial domain of the carpels, normally occupied by the abaxial replum. Formation of external ovule-bearing placenta.                                                                                                                                                                                                                                                                                                                       | 11525739 |   |   |
| AT1G32240 | KAN2   | KANADI 2                                                                                          | Cotyledons are narrow, cup-shaped and point upward. Leaves are narrow, dark green and develop ectopic outgrowths on their abaxial side only. Four to six stipules, rather than two, develop at the base of each leaf, surrounding its entire circumference. Stems fail to elongate upon flowering. Floral organ morphology is highly abnormal. Mature ovules have reduced outer integuments. Aberrant positioning of cell types, primarily along the adaxial/abaxial lateral organ axis. | 11525739 |   |   |
| AT1G32990 | PRPL11 |                                                                                                   | Mutant plants had pale-green cotyledons and leaves.                                                                                                                                                                                                                                                                                                                                                                                                                                      | 11532164 | 1 | 1 |
| AT1G32990 | PRPL11 |                                                                                                   | Relative decrease the effective quantum yield of PSII (#934;I1).                                                                                                                                                                                                                                                                                                                                                                                                                         | 11532164 | 1 | 1 |
| AT1G32990 | PRPL11 |                                                                                                   | Under optimal greenhouse conditions, the size and growth rate of the mutant were reduced by up to 75% relative to wild-type. Furthermore, an average delay of about 5 days in flowering time was observed for mutant plants.                                                                                                                                                                                                                                                             | 11532164 | 1 | 1 |

|           |        |                               |                                                                                                                                                                                                                                                                                                                                                                                                                                                                                                                                                                                                                                                                                                                                                                                                                                                                                                                |          |   |   |
|-----------|--------|-------------------------------|----------------------------------------------------------------------------------------------------------------------------------------------------------------------------------------------------------------------------------------------------------------------------------------------------------------------------------------------------------------------------------------------------------------------------------------------------------------------------------------------------------------------------------------------------------------------------------------------------------------------------------------------------------------------------------------------------------------------------------------------------------------------------------------------------------------------------------------------------------------------------------------------------------------|----------|---|---|
| AT1G28300 | LEC2   |                               | Mutant seeds were not desiccation tolerant (unlike lec1), instead, 50-80% were desiccation intolerant, those that survived and germinated had cotyledons with trichomes on the adaxial surface. Embryos had abnormal suspensors, and precociously activated shoot apical meristem.                                                                                                                                                                                                                                                                                                                                                                                                                                                                                                                                                                                                                             | 11573014 | 1 | 6 |
| AT2G01570 | RGA    | GRS RGA1                      | Does not produce seeds.                                                                                                                                                                                                                                                                                                                                                                                                                                                                                                                                                                                                                                                                                                                                                                                                                                                                                        | 11717468 | 1 | 1 |
| AT2G01570 | RGA    | GRS RGA1                      | Extreme dwarf phenotype.                                                                                                                                                                                                                                                                                                                                                                                                                                                                                                                                                                                                                                                                                                                                                                                                                                                                                       | 11717468 | 1 | 1 |
| AT2G01570 | RGA    | GRS RGA1                      | No bolting.                                                                                                                                                                                                                                                                                                                                                                                                                                                                                                                                                                                                                                                                                                                                                                                                                                                                                                    | 11717468 | 1 | 0 |
| AT2G01570 | RGA    | GRS RGA1                      | Unresponsive to GA treatment in leaf expansion or stem growth.                                                                                                                                                                                                                                                                                                                                                                                                                                                                                                                                                                                                                                                                                                                                                                                                                                                 | 11717468 | 1 | 1 |
| AT2G01570 | RGA    | GRS RGA1                      | Produces seeds.                                                                                                                                                                                                                                                                                                                                                                                                                                                                                                                                                                                                                                                                                                                                                                                                                                                                                                | 11717468 | 1 | 1 |
| AT2G01570 | RGA    | GRS RGA1                      | Semi-dwarf phenotype.                                                                                                                                                                                                                                                                                                                                                                                                                                                                                                                                                                                                                                                                                                                                                                                                                                                                                          | 11717468 | 1 | 1 |
| AT1G74710 | ICS1   |                               | Reduced SA accumulation in response to pathogens, reduced pathogenesis-related gene expression, and enhanced susceptibility to pathogens.                                                                                                                                                                                                                                                                                                                                                                                                                                                                                                                                                                                                                                                                                                                                                                      | 11734859 | 1 | 1 |
| AT1G64060 | RBOHF  | RBOHAP108                     | DAB staining (H2O2 visualization) greatly reduced compared to wild-type.                                                                                                                                                                                                                                                                                                                                                                                                                                                                                                                                                                                                                                                                                                                                                                                                                                       | 11756663 | 1 | 1 |
| AT1G64060 | RBOHF  | RBOHAP108                     | Four-weeks old plants have necrotic lesions and callose deposition.                                                                                                                                                                                                                                                                                                                                                                                                                                                                                                                                                                                                                                                                                                                                                                                                                                            | 11756663 | 1 | 1 |
| AT1G64060 | RBOHF  | RBOHAP108                     | Reduced localized cell death compared to wild-type.                                                                                                                                                                                                                                                                                                                                                                                                                                                                                                                                                                                                                                                                                                                                                                                                                                                            | 11756663 | 1 | 1 |
| AT1G64060 | RBOHF  | RBOHAP108                     | Smaller than wild-type.                                                                                                                                                                                                                                                                                                                                                                                                                                                                                                                                                                                                                                                                                                                                                                                                                                                                                        | 11756663 | 1 | 1 |
| AT1G64060 | RBOHF  | RBOHAP108                     | Some plants stop growing and die before setting seeds.                                                                                                                                                                                                                                                                                                                                                                                                                                                                                                                                                                                                                                                                                                                                                                                                                                                         | 11756663 | 1 | 1 |
| AT1G64060 | RBOHF  | RBOHAP108                     | Diminution of ion leakage (greater even than that of atrbohD).                                                                                                                                                                                                                                                                                                                                                                                                                                                                                                                                                                                                                                                                                                                                                                                                                                                 | 11756663 | 1 | 1 |
| AT1G64060 | RBOHF  | RBOHAP108                     | Morphologically normal but slightly smaller than wild-type.                                                                                                                                                                                                                                                                                                                                                                                                                                                                                                                                                                                                                                                                                                                                                                                                                                                    | 11756663 | 1 | 1 |
| AT1G64060 | RBOHF  | RBOHAP108                     | No change in pattern of DAB staining (H2O2 visualization) compared to wild-type.                                                                                                                                                                                                                                                                                                                                                                                                                                                                                                                                                                                                                                                                                                                                                                                                                               | 11756663 | 1 | 1 |
| AT1G64060 | RBOHF  | RBOHAP108                     | Same phenotype as atrbohF-F3.                                                                                                                                                                                                                                                                                                                                                                                                                                                                                                                                                                                                                                                                                                                                                                                                                                                                                  | 11756663 | 1 | 1 |
| AT1G43850 | SEU    |                               | Defective in floral organ identity and organ number; late-arising flowers exhibited more severe phenotypes than early-arising flowers; in the late-arising flowers, the organ number in whorls 2 and 3 is reduced; on average, only 3 organs are found in whorl 2, and 5 organs in whorl 3; 7% of whorl 1 organs display partial homeotic transformation and possess sepal/petal or sepal/carpel mosaics; whorl 2 organs are most often narrow petals, but stamoid petals were occasionally observed; alternatively, petals can be replaced by filamentous or tubular structures; whorl 3 stamens are typically reduced slightly in size; the whorl 4 gynoecium is often slightly split at the top; sometimes, horn-like protrusions are seen at the gynoecium apex. Narrow floral organs; narrow leaves; reduced plant height (semi dwarf); increased lateral branching; reduced number of seeds per silique. | 11782418 | 6 | 4 |
| AT1G43850 | SEU    |                               | Enhanced flower phenotype compared with both single mutant plants, reduction in floral organ number and enhanced carpelloidy of whorl 1 organs, whorl 2 organs are completely absent. Deregulation of AG and AP3 expression in floral meristem and floral organ primordia.                                                                                                                                                                                                                                                                                                                                                                                                                                                                                                                                                                                                                                     | 11782418 | 2 | 2 |
| AT1G64520 | RPN12A |                               | The rpn12a-1 mutant produces both the WT RPN12A protein and a RPN12A(1-186):ARP(exon2):NPTII fusion protein. The mutant form of the protein can coelute with subunits of the 26S proteasome from the regulatory and core particles and there is no increase in total steady state levels of ubiquitinated proteins in homozygous mutant seedlings. This mutant has seedling growth defects, elevated anthocyanin levels, abnormal leaf root development, delayed skotomorphogenesis, altered cytokinin responses, and reduced auxin sensitivity in their roots.                                                                                                                                                                                                                                                                                                                                                | 11826296 | 7 | 7 |
| AT1G31480 | SGR2   |                               | Abnormal gravitropism in inflorescence stems and hypocotyls. Some mutant seeds were shrunken and did not germinate. Although most seedlings were normal, some had abnormal shape, often with one or three cotyledons.                                                                                                                                                                                                                                                                                                                                                                                                                                                                                                                                                                                                                                                                                          | 11826297 | 3 | 2 |
| AT1G31480 | SGR2   |                               | abnormal gravitropic response                                                                                                                                                                                                                                                                                                                                                                                                                                                                                                                                                                                                                                                                                                                                                                                                                                                                                  | 11826297 | 1 | 1 |
| AT1G78580 | TPS1   |                               | In contrast to the embryo, the endosperm of homozygous seeds developed normally up until seed maturation. During this period starch accumulated transiently in the endosperm cells of both the mutant and wild type. In desiccating homozygous seeds gaps were observed in the aleurone, a persistent layer of the endosperm. These cells appeared devoid of their endoplasm.                                                                                                                                                                                                                                                                                                                                                                                                                                                                                                                                  | 11851922 | 3 | 2 |
| AT1G78580 | TPS1   |                               | In the heterozygote plants, embryos from a single silique were essentially indistinguishable early in the morphogenic phase of development. However, beyond the heart stage a segregation ratio emerged as approximately 25% of the seeds began to develop more slowly. Development was progressively retarded, eventually arresting at the torpedo stage.                                                                                                                                                                                                                                                                                                                                                                                                                                                                                                                                                     | 11851922 | 1 | 1 |
| AT1G78580 | TPS1   |                               | The homozygous progeny is embryo-lethal.                                                                                                                                                                                                                                                                                                                                                                                                                                                                                                                                                                                                                                                                                                                                                                                                                                                                       | 11851922 | 1 | 1 |
| AT1G01510 | AN     | DOQ                           | Trichomes of mutant undergo primary but not secondary branching.                                                                                                                                                                                                                                                                                                                                                                                                                                                                                                                                                                                                                                                                                                                                                                                                                                               | 11889034 | 1 | 1 |
| AT1G01510 | AN     | DOQ                           | Unbranched trichomes.                                                                                                                                                                                                                                                                                                                                                                                                                                                                                                                                                                                                                                                                                                                                                                                                                                                                                          | 11889034 | 1 | 1 |
| AT1G48410 | AG01   |                               | Homozygous mutants initiated flowering 7 to 12 days after the wild type and were fertile; they produced 45 to 60% of the amount of seed of the wild type.                                                                                                                                                                                                                                                                                                                                                                                                                                                                                                                                                                                                                                                                                                                                                      | 11910010 | 1 | 0 |
| AT1G48410 | AG01   |                               | Mutants develop rosettes with dark green and serrated leaves. Rosette size is intermediate between that of stronger alleles and wild-type plants.                                                                                                                                                                                                                                                                                                                                                                                                                                                                                                                                                                                                                                                                                                                                                              | 11910010 | 2 | 2 |
| AT1G48410 | AG01   |                               | Homozygous mutant develop a small rosette with dark green and serrated leaves, initiates flowering 10 to 15 days after the wild type, and is almost totally sterile, although occasionally it produces short siliques containing two to five seed.                                                                                                                                                                                                                                                                                                                                                                                                                                                                                                                                                                                                                                                             | 11910010 | 1 | 1 |
| AT1G48410 | AG01   |                               | The homozygous progeny is self-sterile.                                                                                                                                                                                                                                                                                                                                                                                                                                                                                                                                                                                                                                                                                                                                                                                                                                                                        | 11910010 | 1 | 1 |
| AT1G48410 | AG01   |                               | Homozygous plants are completely deficient for post-transcriptional gene silencing.                                                                                                                                                                                                                                                                                                                                                                                                                                                                                                                                                                                                                                                                                                                                                                                                                            | 11910010 | 1 | 1 |
| AT1G16970 | KU70   |                               | Hypersensitive to ionizing radiation and chemical mutagens                                                                                                                                                                                                                                                                                                                                                                                                                                                                                                                                                                                                                                                                                                                                                                                                                                                     | 12032094 | 1 | 1 |
| AT1G55670 | PSAG   |                               | Complete loss of PSI-G in thylakoids.                                                                                                                                                                                                                                                                                                                                                                                                                                                                                                                                                                                                                                                                                                                                                                                                                                                                          | 12068106 | 1 | 1 |
| AT1G55670 | PSAG   |                               | Decrease in mean size.                                                                                                                                                                                                                                                                                                                                                                                                                                                                                                                                                                                                                                                                                                                                                                                                                                                                                         | 12068106 | 1 | 1 |
| AT1G55670 | PSAG   |                               | Germination of mutant seeds was not affected and visual inspection did not reveal any drastic change in phenotype compared with WT plants, except for a slightly lighter pigmentation.                                                                                                                                                                                                                                                                                                                                                                                                                                                                                                                                                                                                                                                                                                                         | 12068106 | 1 | 1 |
| AT1G55670 | PSAG   |                               | The Chl a/b ratio was slightly reduced.                                                                                                                                                                                                                                                                                                                                                                                                                                                                                                                                                                                                                                                                                                                                                                                                                                                                        | 12068106 | 1 | 1 |
| AT1G55670 | PSAG   |                               | The level of the xanthophyll cycle pigments (VAZ-pool) was higher than in WT plants.                                                                                                                                                                                                                                                                                                                                                                                                                                                                                                                                                                                                                                                                                                                                                                                                                           | 12068106 | 1 | 1 |
| AT1G55670 | PSAG   |                               | The total Chl content (Chla and Chlb) was decreased by about 25% compared to wild type.                                                                                                                                                                                                                                                                                                                                                                                                                                                                                                                                                                                                                                                                                                                                                                                                                        | 12068106 | 1 | 1 |
| AT1G55670 | PSAG   |                               | Under long-day conditions, mutant plants flowered 8 d later than wild type.                                                                                                                                                                                                                                                                                                                                                                                                                                                                                                                                                                                                                                                                                                                                                                                                                                    | 12068106 | 1 | 1 |
| AT1G55670 | PSAG   |                               | Double mutants were intermediate in mean size when compared with the corresponding single mutants.                                                                                                                                                                                                                                                                                                                                                                                                                                                                                                                                                                                                                                                                                                                                                                                                             | 12068106 | 1 | 1 |
| AT1G55670 | PSAG   |                               | No drop in total Chl levels.                                                                                                                                                                                                                                                                                                                                                                                                                                                                                                                                                                                                                                                                                                                                                                                                                                                                                   | 12068106 | 1 | 1 |
| AT1G55670 | PSAG   |                               | Increase in the Chl a/b ratio.                                                                                                                                                                                                                                                                                                                                                                                                                                                                                                                                                                                                                                                                                                                                                                                                                                                                                 | 12068106 | 1 | 1 |
| AT1G52230 | PSAH2  |                               | Double mutants were intermediate in mean size when compared with the corresponding single mutants.                                                                                                                                                                                                                                                                                                                                                                                                                                                                                                                                                                                                                                                                                                                                                                                                             | 12068106 | 1 | 0 |
| AT1G52230 | PSAH2  |                               | No drop in total Chl levels.                                                                                                                                                                                                                                                                                                                                                                                                                                                                                                                                                                                                                                                                                                                                                                                                                                                                                   | 12068106 | 1 | 0 |
| AT1G52230 | PSAH2  |                               | The level of the xanthophyll cycle pigments (VAZ-pool) was higher than in WT plants.                                                                                                                                                                                                                                                                                                                                                                                                                                                                                                                                                                                                                                                                                                                                                                                                                           | 12068106 | 1 | 0 |
| AT1G52230 | PSAH2  |                               | 70% of the WT level of PSI-H is still present in mutant plants.                                                                                                                                                                                                                                                                                                                                                                                                                                                                                                                                                                                                                                                                                                                                                                                                                                                | 12068106 | 1 | 0 |
| AT1G52230 | PSAH2  |                               | Mutant plants were, in average, larger than the WT.                                                                                                                                                                                                                                                                                                                                                                                                                                                                                                                                                                                                                                                                                                                                                                                                                                                            | 12068106 | 1 | 0 |
| AT1G52230 | PSAH2  |                               | Under long-day conditions, mutant plants flowered 3 d earlier than wild type.                                                                                                                                                                                                                                                                                                                                                                                                                                                                                                                                                                                                                                                                                                                                                                                                                                  | 12068106 | 1 | 0 |
| AT1G30380 |        |                               | Double mutants were intermediate in mean size when compared with the corresponding single mutants.                                                                                                                                                                                                                                                                                                                                                                                                                                                                                                                                                                                                                                                                                                                                                                                                             | 12068106 | 1 | 0 |
| AT1G30380 |        |                               | Germination of mutant seeds was not affected and visual inspection did not reveal any drastic change in phenotype compared with WT plants, except for a slightly lighter pigmentation.                                                                                                                                                                                                                                                                                                                                                                                                                                                                                                                                                                                                                                                                                                                         | 12068106 | 1 | 0 |
| AT1G30380 |        |                               | Increase in the Chl a/b ratio.                                                                                                                                                                                                                                                                                                                                                                                                                                                                                                                                                                                                                                                                                                                                                                                                                                                                                 | 12068106 | 1 | 0 |
| AT1G30380 |        |                               | No drop in total Chl levels.                                                                                                                                                                                                                                                                                                                                                                                                                                                                                                                                                                                                                                                                                                                                                                                                                                                                                   | 12068106 | 1 | 0 |
| AT1G30380 |        |                               | The level of the xanthophyll cycle pigments (VAZ-pool) was higher than in WT plants.                                                                                                                                                                                                                                                                                                                                                                                                                                                                                                                                                                                                                                                                                                                                                                                                                           | 12068106 | 1 | 0 |
| AT1G30380 |        |                               | Decrease in mean size.                                                                                                                                                                                                                                                                                                                                                                                                                                                                                                                                                                                                                                                                                                                                                                                                                                                                                         | 12068106 | 1 | 0 |
| AT1G52340 | ABA2   | G1N1 IS14 SAN3 SDR1 SIS4 SRE1 | Unstressed leaves contain 20 to 25% of wild type levels of ABA.                                                                                                                                                                                                                                                                                                                                                                                                                                                                                                                                                                                                                                                                                                                                                                                                                                                | 12172025 | 1 | 1 |
| AT1G52340 | ABA2   | G1N1 IS14 SAN3 SDR1 SIS4 SRE1 | Can germinate and perform early growth under high-salt concentration that are inhibitory for wild type seeds.                                                                                                                                                                                                                                                                                                                                                                                                                                                                                                                                                                                                                                                                                                                                                                                                  | 12172025 | 1 | 1 |
| AT1G52340 | ABA2   | G1N1 IS14 SAN3 SDR1 SIS4 SRE1 | Mutant plants are more sensitive to salt stress at later stages of development and are killed by prolonged exposure to 100 mM NaCl or 200 mM mannitol, whereas wild type plants survive.                                                                                                                                                                                                                                                                                                                                                                                                                                                                                                                                                                                                                                                                                                                       | 12172025 | 1 | 1 |
| AT1G52340 | ABA2   | G1N1 IS14 SAN3 SDR1 SIS4 SRE1 | Seeds are more tolerant of osmotic stress at germination than wild type seedlings.                                                                                                                                                                                                                                                                                                                                                                                                                                                                                                                                                                                                                                                                                                                                                                                                                             | 12172025 | 1 | 1 |

|           |         |                                                                                                         |                                                                                                                                                                                                                                                                                                                                                                                                                                                                                                                                                                                                                                                                                                                                                                                                                                                                                                                                                                                                                                                                                                                                                                                                                                                                                                                                                                                                                                                                                                                                                                                         |          |   |   |
|-----------|---------|---------------------------------------------------------------------------------------------------------|-----------------------------------------------------------------------------------------------------------------------------------------------------------------------------------------------------------------------------------------------------------------------------------------------------------------------------------------------------------------------------------------------------------------------------------------------------------------------------------------------------------------------------------------------------------------------------------------------------------------------------------------------------------------------------------------------------------------------------------------------------------------------------------------------------------------------------------------------------------------------------------------------------------------------------------------------------------------------------------------------------------------------------------------------------------------------------------------------------------------------------------------------------------------------------------------------------------------------------------------------------------------------------------------------------------------------------------------------------------------------------------------------------------------------------------------------------------------------------------------------------------------------------------------------------------------------------------------|----------|---|---|
| AT1G21970 | NFYB9   | LEC1                                                                                                    | Embryo lethal: viviparous embryos with cotyledons partially transformed into leaves; embryos sensitive to abscisic acid; embryos have reduced hypocotyl, cotyledons that remain green late in development; reduced protein and lipid bodies with starch being predominant storage product in mutant embryos. Trichomes form on cotyledons after germination; internal cells of cotyledons enlarge, vacuolate and resemble leaf mesophyll cells; intercellular spaces are prominent in cotyledons; enlarged shoot apical meristem; stomata are found on surface of cotyledons of mutant embryos; mature seeds are desiccation intolerant, however, immature seeds can be rescued before silique drying and germinated to produce seedlings. Root apex is active in viviparous seeds; immature mutant embryos germinated prior to desiccation produce plants that appear normal for other characteristics.                                                                                                                                                                                                                                                                                                                                                                                                                                                                                                                                                                                                                                                                                | 12244233 |   |   |
| AT1G28300 | LEC2    |                                                                                                         | Embryo lethal, embryos not viviparous, cotyledons partially transformed into leaves, complex vascular pattern observed in cotyledons. Embryos are sensitive to abscisic acid. Mutant seeds were usually desiccation tolerant at maturity, although their viability was reduced slightly after several weeks of storage. Dry seeds often germinated to produce seedlings with distorted cotyledons. This defect resulted from degeneration of cotyledon tips prior to germination. Some trichomes form on cotyledons after germination and stomata are found on surface of cotyledons of mutant embryos. The cotyledon surface on seedlings produced from dry seeds lacked trichomes (likely because any trichomes initiated during embryogenesis did not survive desiccation). Mutant seeds were consequently highly pigmented at maturity and anthocyanins were especially prominent in the top half of the mutant cotyledons. Mutant embryos do not form roots during the first 48 hours of culture. The pattern of storage product accumulation was altered, the hypocotyl was filled with mature protein bodies, while the cotyledons exhibited a gradient of starch and protein accumulation. Cells in the top half of mutant cotyledons were highly vacuolated, packed with starch grains, and lacked mature protein bodies, whereas cells closer to the hypocotyl contained less starch but many protein bodies. The accumulation of lipid bodies during embryogenesis was unusual too: distribution of lipid bodies was highly abundant in the hypocotyls of the mutant plants. | 12244265 |   |   |
| AT1G28300 | LEC2    |                                                                                                         | strongly impaired ability to induce somatic embryos in vitro                                                                                                                                                                                                                                                                                                                                                                                                                                                                                                                                                                                                                                                                                                                                                                                                                                                                                                                                                                                                                                                                                                                                                                                                                                                                                                                                                                                                                                                                                                                            | 12244265 |   |   |
| AT2G01830 | WOL     | AHK4 ARABIDOPSIS HISTIDINE KINASE 4<br>ATCRE1 CRE1 CYTOKININ RESPONSE 1<br>WOL1 WOODEN LEG WOODEN LEG 1 | In the presence of kinetin, lateral root formation is not greatly inhibited, even at high concentrations.                                                                                                                                                                                                                                                                                                                                                                                                                                                                                                                                                                                                                                                                                                                                                                                                                                                                                                                                                                                                                                                                                                                                                                                                                                                                                                                                                                                                                                                                               | 12410813 | 1 | 1 |
| AT1G64440 | UGE4    | REB1 RHD1                                                                                               | Decrease root length (54% of that of wildtype) when grown on D-galactose-free medium.                                                                                                                                                                                                                                                                                                                                                                                                                                                                                                                                                                                                                                                                                                                                                                                                                                                                                                                                                                                                                                                                                                                                                                                                                                                                                                                                                                                                                                                                                                   | 12419184 |   |   |
| AT1G64440 | UGE4    | REB1 RHD1                                                                                               | Decreased root length (67% of that of wildtype) when grown on D-galactose-free medium.                                                                                                                                                                                                                                                                                                                                                                                                                                                                                                                                                                                                                                                                                                                                                                                                                                                                                                                                                                                                                                                                                                                                                                                                                                                                                                                                                                                                                                                                                                  | 12419184 |   |   |
| AT1G77760 | NIA1    |                                                                                                         | ABA inhibits stomatal opening in nial nia2 as in the wild type, revealing that not all stomatal responses to ABA are reduced.                                                                                                                                                                                                                                                                                                                                                                                                                                                                                                                                                                                                                                                                                                                                                                                                                                                                                                                                                                                                                                                                                                                                                                                                                                                                                                                                                                                                                                                           | 12446847 | 1 | 1 |
| AT1G77760 | NIA1    |                                                                                                         | Nitrite fails to induce stomatal closure in epidermal peels of the double mutant.                                                                                                                                                                                                                                                                                                                                                                                                                                                                                                                                                                                                                                                                                                                                                                                                                                                                                                                                                                                                                                                                                                                                                                                                                                                                                                                                                                                                                                                                                                       | 12446847 | 1 | 0 |
| AT1G77760 | NIA1    |                                                                                                         | No emission of NO (nitric oxide) under condition in which wild-type does. Wounding-induced NO production is however still observed.                                                                                                                                                                                                                                                                                                                                                                                                                                                                                                                                                                                                                                                                                                                                                                                                                                                                                                                                                                                                                                                                                                                                                                                                                                                                                                                                                                                                                                                     | 12446847 | 1 | 1 |
| AT1G77760 | NIA1    |                                                                                                         | Stomata are far less sensitive to ABA.                                                                                                                                                                                                                                                                                                                                                                                                                                                                                                                                                                                                                                                                                                                                                                                                                                                                                                                                                                                                                                                                                                                                                                                                                                                                                                                                                                                                                                                                                                                                                  | 12446847 | 1 | 1 |
| AT1G37130 | NIA2    |                                                                                                         | ABA inhibits stomatal opening in nial nia2 as in the wild type, revealing that not all stomatal responses to ABA are reduced.                                                                                                                                                                                                                                                                                                                                                                                                                                                                                                                                                                                                                                                                                                                                                                                                                                                                                                                                                                                                                                                                                                                                                                                                                                                                                                                                                                                                                                                           | 12446847 | 1 | 1 |
| AT1G37130 | NIA2    |                                                                                                         | Nitrite fails to induce stomatal closure in epidermal peels of the double mutant.                                                                                                                                                                                                                                                                                                                                                                                                                                                                                                                                                                                                                                                                                                                                                                                                                                                                                                                                                                                                                                                                                                                                                                                                                                                                                                                                                                                                                                                                                                       | 12446847 | 1 | 1 |
| AT1G37130 | NIA2    |                                                                                                         | No emission of NO (nitric oxide) under condition in which wild-type does. Wounding-induced NO production is however still observed.                                                                                                                                                                                                                                                                                                                                                                                                                                                                                                                                                                                                                                                                                                                                                                                                                                                                                                                                                                                                                                                                                                                                                                                                                                                                                                                                                                                                                                                     | 12446847 | 1 | 1 |
| AT1G37130 | NIA2    |                                                                                                         | Stomata are far less sensitive to ABA.                                                                                                                                                                                                                                                                                                                                                                                                                                                                                                                                                                                                                                                                                                                                                                                                                                                                                                                                                                                                                                                                                                                                                                                                                                                                                                                                                                                                                                                                                                                                                  | 12446847 | 1 | 1 |
| AT1G50960 | GA2OX7  |                                                                                                         | In long day conditions, no significant difference in flowering behaviour between mutant and wild-type.                                                                                                                                                                                                                                                                                                                                                                                                                                                                                                                                                                                                                                                                                                                                                                                                                                                                                                                                                                                                                                                                                                                                                                                                                                                                                                                                                                                                                                                                                  | 12509528 | 1 | 1 |
| AT1G50960 | GA2OX7  |                                                                                                         | In short day conditions mutant formed fewer rosette leaves before bolting.                                                                                                                                                                                                                                                                                                                                                                                                                                                                                                                                                                                                                                                                                                                                                                                                                                                                                                                                                                                                                                                                                                                                                                                                                                                                                                                                                                                                                                                                                                              | 12509528 | 1 | 1 |
| AT1G50960 | GA2OX7  |                                                                                                         | In short day conditions, mutant formed a greater number of cauline leaves.                                                                                                                                                                                                                                                                                                                                                                                                                                                                                                                                                                                                                                                                                                                                                                                                                                                                                                                                                                                                                                                                                                                                                                                                                                                                                                                                                                                                                                                                                                              | 12509528 | 1 | 1 |
| AT1G50960 | GA2OX7  |                                                                                                         | Longer hypocotyl compared to wild-type when grown in medium- and low-light.                                                                                                                                                                                                                                                                                                                                                                                                                                                                                                                                                                                                                                                                                                                                                                                                                                                                                                                                                                                                                                                                                                                                                                                                                                                                                                                                                                                                                                                                                                             | 12509528 | 1 | 1 |
| AT1G50960 | GA2OX7  |                                                                                                         | Dwarf (growth under long-day photoperiod).                                                                                                                                                                                                                                                                                                                                                                                                                                                                                                                                                                                                                                                                                                                                                                                                                                                                                                                                                                                                                                                                                                                                                                                                                                                                                                                                                                                                                                                                                                                                              | 12509528 | 1 | 1 |
| AT2G02480 |         |                                                                                                         | No branching of trichomes.                                                                                                                                                                                                                                                                                                                                                                                                                                                                                                                                                                                                                                                                                                                                                                                                                                                                                                                                                                                                                                                                                                                                                                                                                                                                                                                                                                                                                                                                                                                                                              | 12586888 | 1 | 0 |
| AT1G13870 | RTI12   | DRL1 ELO4                                                                                               | Narrow leaf lamina phenotype.                                                                                                                                                                                                                                                                                                                                                                                                                                                                                                                                                                                                                                                                                                                                                                                                                                                                                                                                                                                                                                                                                                                                                                                                                                                                                                                                                                                                                                                                                                                                                           | 12615938 | 1 | 1 |
| AT2G01570 | RG1     | GRS RGA1                                                                                                | Partial rescue of the syl1-10 dwarf phenotype but no significant suppression of the germination or fertility defects.                                                                                                                                                                                                                                                                                                                                                                                                                                                                                                                                                                                                                                                                                                                                                                                                                                                                                                                                                                                                                                                                                                                                                                                                                                                                                                                                                                                                                                                                   | 12724538 | 1 | 1 |
| AT1G55580 | SCL18   | LAS                                                                                                     | Almost complete suppression of secondary bolt formation from the axils of rosette leaves. Side shoot formation from the axils of cauline leaves of the primary bolt is not inhibited. The point of separation between lateral shoots and the main axis is often displaced acropetally. Branching from the first two or three leaves of secondary shoots is blocked. Petal abscission is delayed.                                                                                                                                                                                                                                                                                                                                                                                                                                                                                                                                                                                                                                                                                                                                                                                                                                                                                                                                                                                                                                                                                                                                                                                        | 12730136 | 1 | 1 |
| AT1G79440 | ALDH5F1 | SSADH1                                                                                                  | Phenotypically dwarfed with necrotic lesions, bleached leaves, reduced leaf area, lower chlorophyll content, shorter hypocotyls and fewer flowers. Weaker phenotype compared to other ssadh alleles; inflorescences were 25-30% higher than those of ssadh-1.                                                                                                                                                                                                                                                                                                                                                                                                                                                                                                                                                                                                                                                                                                                                                                                                                                                                                                                                                                                                                                                                                                                                                                                                                                                                                                                           | 12740438 | 3 | 1 |
| AT1G79440 | ALDH5F1 | SSADH1                                                                                                  | Phenotypically dwarfed with necrotic lesions, bleached leaves, reduced leaf area, lower chlorophyll content, shorter hypocotyls and fewer flowers.                                                                                                                                                                                                                                                                                                                                                                                                                                                                                                                                                                                                                                                                                                                                                                                                                                                                                                                                                                                                                                                                                                                                                                                                                                                                                                                                                                                                                                      | 12740438 | 1 | 1 |
| AT1G05850 | CTL1    | ARM ELP1 ERH2 HOT2 POM1                                                                                 | defect in thermotolerance                                                                                                                                                                                                                                                                                                                                                                                                                                                                                                                                                                                                                                                                                                                                                                                                                                                                                                                                                                                                                                                                                                                                                                                                                                                                                                                                                                                                                                                                                                                                                               | 12805605 | 1 | 1 |
| AT1G30950 |         |                                                                                                         | Mutants produce less than one petal per flower on average, although most basal flowers can have more.                                                                                                                                                                                                                                                                                                                                                                                                                                                                                                                                                                                                                                                                                                                                                                                                                                                                                                                                                                                                                                                                                                                                                                                                                                                                                                                                                                                                                                                                                   | 12826617 | 1 | 0 |
| AT1G30950 |         |                                                                                                         | Weak allele specifically affecting petal development.                                                                                                                                                                                                                                                                                                                                                                                                                                                                                                                                                                                                                                                                                                                                                                                                                                                                                                                                                                                                                                                                                                                                                                                                                                                                                                                                                                                                                                                                                                                                   | 12826617 | 1 | 1 |
| AT1G06520 |         |                                                                                                         | Reduced fertility due to male sterility. Pollen collapsed and outcompeted by wild type pollen. Phenotype apparent at microspore release stage II. Tapetum differentiation is abnormal which causes a sporophytic defect on microgametogenesis.                                                                                                                                                                                                                                                                                                                                                                                                                                                                                                                                                                                                                                                                                                                                                                                                                                                                                                                                                                                                                                                                                                                                                                                                                                                                                                                                          | 12897259 | 4 | 2 |
| AT1G71696 | SOL1    | SUPPRESSOR OF LLP1 1                                                                                    | same as smb-3 single mutant                                                                                                                                                                                                                                                                                                                                                                                                                                                                                                                                                                                                                                                                                                                                                                                                                                                                                                                                                                                                                                                                                                                                                                                                                                                                                                                                                                                                                                                                                                                                                             | 12932329 |   |   |
| AT1G36160 | ACC1    | EMB22 GK PAS3                                                                                           | Heterozygous plants appear normal, except for the production of some severely wrinkled seeds. The altered seed phenotype is visible, during silique maturation, as white seeds amongst green ones. The desiccated wrinkled seeds are unable to germinate after imbibition (embryo lethal).                                                                                                                                                                                                                                                                                                                                                                                                                                                                                                                                                                                                                                                                                                                                                                                                                                                                                                                                                                                                                                                                                                                                                                                                                                                                                              | 12943542 | 1 | 1 |
| AT1G36160 | ACC1    | EMB22 GK PAS3                                                                                           | embryo lethal.                                                                                                                                                                                                                                                                                                                                                                                                                                                                                                                                                                                                                                                                                                                                                                                                                                                                                                                                                                                                                                                                                                                                                                                                                                                                                                                                                                                                                                                                                                                                                                          | 12943542 | 1 | 1 |
| AT1G67500 | REV3    | ATREV3 recovery protein 3                                                                               | The root growth of mutant plants was inhibited after UV-B irradiation under both light and dark conditions. Mutant seedlings also were sensitive to gamma-rays and mitomycin C, which are known to inhibit DNA replication. Incorporation of bromodeoxyuridine after UV-B irradiation was less in rev3-1 than in the wild type.                                                                                                                                                                                                                                                                                                                                                                                                                                                                                                                                                                                                                                                                                                                                                                                                                                                                                                                                                                                                                                                                                                                                                                                                                                                         | 12953110 | 1 | 1 |
| AT1G68765 | IDA     |                                                                                                         | Ethylene-sensitive mutant, floral organs remain attached to the plant body after the shedding of mature seeds, even though a floral abscission zone develops. No other developmental processes were affected. When grown on the medium containing ethylene (10 ppm), mutant seedlings response was limited to lack of abscission in senesced floral organs. Except with regard to floral abscission, seedling response to ethylene was the same as in wild type.                                                                                                                                                                                                                                                                                                                                                                                                                                                                                                                                                                                                                                                                                                                                                                                                                                                                                                                                                                                                                                                                                                                        | 12972671 | 1 | 1 |
| AT1G09530 | PIF3    | BHLH8 EN100 PAP3                                                                                        | Mutant plants contained chlorophyll amounts comparable to those of the wild-type controls.                                                                                                                                                                                                                                                                                                                                                                                                                                                                                                                                                                                                                                                                                                                                                                                                                                                                                                                                                                                                                                                                                                                                                                                                                                                                                                                                                                                                                                                                                              | 14508006 | 1 | 1 |
| AT1G09530 | PIF3    | BHLH8 EN100 PAP3                                                                                        | The mutant responds hypersensitively to red light but normally to far-red light for the inhibition of hypocotyl elongation.                                                                                                                                                                                                                                                                                                                                                                                                                                                                                                                                                                                                                                                                                                                                                                                                                                                                                                                                                                                                                                                                                                                                                                                                                                                                                                                                                                                                                                                             | 14508006 | 1 | 1 |
| AT1G09530 | PIF3    | BHLH8 EN100 PAP3                                                                                        | Under red and far-red light growth conditions, mutant plants have larger than normal cotyledons.                                                                                                                                                                                                                                                                                                                                                                                                                                                                                                                                                                                                                                                                                                                                                                                                                                                                                                                                                                                                                                                                                                                                                                                                                                                                                                                                                                                                                                                                                        | 14508006 | 1 | 1 |
| AT1G09570 | PHYA    | ELONGATED HYPOCOTYL 8 FAR RED ELONGATED 1 FAR RED ELONGATED HYPOCOTYL 2 PHY2 FRE1 HYS phyTochrome A     | The prr7 mutant phenotype in Re was more dramatic in the phyA-101 background, especially in the range from 0.1 to 10 &#956;mol photons <sup>-2</sup> s <sup>-1</sup> . However, in FRC, phyA prr7 double mutant seedlings were indistinguishable from phyA seedlings.                                                                                                                                                                                                                                                                                                                                                                                                                                                                                                                                                                                                                                                                                                                                                                                                                                                                                                                                                                                                                                                                                                                                                                                                                                                                                                                   | 14563930 | 1 | 1 |
| AT2G02950 | PKS1    |                                                                                                         | Under hourly R pulses, the pks mutation also had no effect in the phyA background.                                                                                                                                                                                                                                                                                                                                                                                                                                                                                                                                                                                                                                                                                                                                                                                                                                                                                                                                                                                                                                                                                                                                                                                                                                                                                                                                                                                                                                                                                                      | 14615593 | 1 | 0 |
| AT2G02950 | PKS1    |                                                                                                         | Blocking of greening was enhanced in the mutant exposed to hourly pulses of FR.                                                                                                                                                                                                                                                                                                                                                                                                                                                                                                                                                                                                                                                                                                                                                                                                                                                                                                                                                                                                                                                                                                                                                                                                                                                                                                                                                                                                                                                                                                         | 14615593 | 1 | 1 |
| AT2G02950 | PKS1    |                                                                                                         | In dark controls, hypocotyl growth was unaffected by the mutations and the cotyledons remained fully closed. Compared with those in the wild type, hypocotyl growth inhibition and cotyledon unfolding responses to hourly FR pulses were significantly greater in the mutant.                                                                                                                                                                                                                                                                                                                                                                                                                                                                                                                                                                                                                                                                                                                                                                                                                                                                                                                                                                                                                                                                                                                                                                                                                                                                                                          | 14615593 | 1 | 1 |
| AT2G02950 | PKS1    |                                                                                                         | No differences were observed under hourly R pulses or continuous FR between wild-type and mutant plants.                                                                                                                                                                                                                                                                                                                                                                                                                                                                                                                                                                                                                                                                                                                                                                                                                                                                                                                                                                                                                                                                                                                                                                                                                                                                                                                                                                                                                                                                                | 14615593 | 1 | 0 |
| AT2G02950 | PKS1    |                                                                                                         | No obvious root growth phenotypes.                                                                                                                                                                                                                                                                                                                                                                                                                                                                                                                                                                                                                                                                                                                                                                                                                                                                                                                                                                                                                                                                                                                                                                                                                                                                                                                                                                                                                                                                                                                                                      | 14615593 | 1 | 1 |
| AT2G02950 | PKS1    |                                                                                                         | Wild-type-like hypocotyl growth inhibition response to hourly FR pulses.                                                                                                                                                                                                                                                                                                                                                                                                                                                                                                                                                                                                                                                                                                                                                                                                                                                                                                                                                                                                                                                                                                                                                                                                                                                                                                                                                                                                                                                                                                                | 14615593 | 1 | 1 |
| AT2G02950 | PKS1    |                                                                                                         | With respect to cotyledon unfolding and greening, the double mutant was indistinguishable from the wild type.                                                                                                                                                                                                                                                                                                                                                                                                                                                                                                                                                                                                                                                                                                                                                                                                                                                                                                                                                                                                                                                                                                                                                                                                                                                                                                                                                                                                                                                                           | 14615593 | 1 | 1 |
| AT1G14280 | PKS2    |                                                                                                         | Under hourly R pulses, the pks mutation also had no effect in the phyA background.                                                                                                                                                                                                                                                                                                                                                                                                                                                                                                                                                                                                                                                                                                                                                                                                                                                                                                                                                                                                                                                                                                                                                                                                                                                                                                                                                                                                                                                                                                      | 14615593 | 1 | 0 |
| AT1G14280 | PKS2    |                                                                                                         | Wild-type-like hypocotyl growth inhibition response to hourly FR pulses.                                                                                                                                                                                                                                                                                                                                                                                                                                                                                                                                                                                                                                                                                                                                                                                                                                                                                                                                                                                                                                                                                                                                                                                                                                                                                                                                                                                                                                                                                                                | 14615593 | 1 | 1 |
| AT1G14280 | PKS2    |                                                                                                         | With respect to cotyledon unfolding and greening, the double mutant was indistinguishable from the wild type.                                                                                                                                                                                                                                                                                                                                                                                                                                                                                                                                                                                                                                                                                                                                                                                                                                                                                                                                                                                                                                                                                                                                                                                                                                                                                                                                                                                                                                                                           | 14615593 | 1 | 1 |

|           |       |                                                                                                     |                                                                                                                                                                                                                                                                                                                                                                                                                                                                                                                                                                                                                                                                                                                                                                                                                                                    |          |   |   |
|-----------|-------|-----------------------------------------------------------------------------------------------------|----------------------------------------------------------------------------------------------------------------------------------------------------------------------------------------------------------------------------------------------------------------------------------------------------------------------------------------------------------------------------------------------------------------------------------------------------------------------------------------------------------------------------------------------------------------------------------------------------------------------------------------------------------------------------------------------------------------------------------------------------------------------------------------------------------------------------------------------------|----------|---|---|
| AT1G14280 | PKS2  |                                                                                                     | Blocking of greening was enhanced in the mutant exposed to hourly pulses of FR.                                                                                                                                                                                                                                                                                                                                                                                                                                                                                                                                                                                                                                                                                                                                                                    | 14615593 | 1 | 1 |
| AT1G14280 | PKS2  |                                                                                                     | In dark controls, hypocotyl growth was unaffected by the mutations and the cotyledons remained fully closed. Compared with those in the wild type, hypocotyl growth inhibition and cotyledon unfolding responses to hourly FR pulses were significantly greater in the mutant.                                                                                                                                                                                                                                                                                                                                                                                                                                                                                                                                                                     | 14615593 | 1 | 1 |
| AT1G14280 | PKS2  |                                                                                                     | No differences were observed under hourly R pulses or continuous FR between wild-type and mutant plants.                                                                                                                                                                                                                                                                                                                                                                                                                                                                                                                                                                                                                                                                                                                                           | 14615593 | 1 | 1 |
| AT1G09570 | PHYA  | ELONGATED HYPOCOTYL 8 FAR RED ELONGATED 1 FAR RED ELONGATED HYPOCOTYL 2 PHY2 FRE1 HYS dhyTochrome A | Under hourly R pulses, the pks mutation also had no effect in the phyA background.                                                                                                                                                                                                                                                                                                                                                                                                                                                                                                                                                                                                                                                                                                                                                                 | 14615593 | 1 | 0 |
| AT1G50250 | FTSH1 | AAA FTSH                                                                                            | no visible difference in leaf morphology and variegation when grown under normal light and temperature conditions compared to wild-type.                                                                                                                                                                                                                                                                                                                                                                                                                                                                                                                                                                                                                                                                                                           | 14630971 | 1 | 1 |
| AT1G06430 | FTSH8 |                                                                                                     | no visible difference in leaf morphology and variegation when grown under normal light and temperature conditions compared to wild-type.                                                                                                                                                                                                                                                                                                                                                                                                                                                                                                                                                                                                                                                                                                           | 14630971 | 1 | 0 |
| AT1G03000 | PEX6  |                                                                                                     | Resistant to root elongation inhibition by IBA but responds normally to IAA. Fails to respond to the stimulatory effects of IBA on lateral root initiation but makes lateral roots in response to IAA. Specifically defective in IBA responses. Has several peroxisome-defective phenotypes: does not develop normally without exogenous sucrose, dramatic defects in hypocotyl and root elongation in the absence of sucrose. Shorter root and hypocotyl than WT. Plants grown in soil have smaller rosettes, fewer rosette leaves, and shorter primary inflorescence stems than WT. Also has shorter siliques containing fewer seeds than WT. Pale green in color.                                                                                                                                                                               | 14745029 | 3 | 3 |
| AT1G76490 |       |                                                                                                     | Inhibition of root elongation, dwarf, sterile, rapid senescence in mature leaves                                                                                                                                                                                                                                                                                                                                                                                                                                                                                                                                                                                                                                                                                                                                                                   | 14871314 |   |   |
| AT1G59940 | ARR3  | response reGulaTor_3                                                                                | altered red light sensitivity                                                                                                                                                                                                                                                                                                                                                                                                                                                                                                                                                                                                                                                                                                                                                                                                                      | 14973166 | 1 | 1 |
| AT1G49430 | LACS2 | LATERAL ROOT DEVELOPMENT 2 LRD2                                                                     | Mutant leaves were small and irregular in shape compared with the wild type. Both surfaces of mutant leaves differed from the wild type. Adaxial surfaces of the wild type showed the characteristic jigsaw puzzle shape of pavement cells. In the mutant, the cells contained fewer, larger lobes. Epidermal cells on the abaxial surface of mutants were collapsed. This collapsed appearance was consistently seen in views of the abaxial leaf surface of mutant plants but was never observed on the abaxial surface of wild-type leaves or on the adaxial surfaces of either the wild-type or mutant plants.                                                                                                                                                                                                                                 | 14973169 | 2 | 2 |
| AT1G49430 | LACS2 | LATERAL ROOT DEVELOPMENT 2 LRD2                                                                     | Mutant rosettes were slower to flower than wildtype plants (34.1 d versus 30.2 d under a 16-h photoperiod). Mutant plants produced smaller bolts, but flower morphology and fertility were normal, and siliques were similar in size to those on wild-type plants. The smaller bolts of the mutant yielded only 62 mg seed/plant compared with 177 mg seed/plant from wild-type controls. Harvested mutant seeds appeared smaller and darker than seeds from wild-type plants that had been grown alongside the mutants. Examination by light microscopy revealed that 50% of mutant seeds contained green embryos that could be distinguished through the testa. When the green and normal brown seeds from a mutant plant were germinated separately, the green seeds showed 79% germination compared with 100% germination for the brown seeds. | 14973169 | 1 | 1 |
| AT1G49430 | LACS2 | LATERAL ROOT DEVELOPMENT 2 LRD2                                                                     | Only 80.0% of mutant seedlings emerged. At 6 d, a percentage of the emerged mutant seedlings would not grow and develop into viable plants. These seedlings had white cotyledons, and they eventually died. At 19 d, 91.0% of the wild-type seeds that germinated had produced viable rosettes with four to five pairs of true leaves. For the mutants, only 72.2% of seeds that had germinated (58% of those sown) produced rosettes. At this stage, the mutant had only two to three pairs of true leaves.                                                                                                                                                                                                                                                                                                                                       | 14973169 | 1 | 1 |
| AT1G49430 | LACS2 | LATERAL ROOT DEVELOPMENT 2 LRD2                                                                     | Reduced-growth phenotype.                                                                                                                                                                                                                                                                                                                                                                                                                                                                                                                                                                                                                                                                                                                                                                                                                          | 14973169 | 1 | 1 |
| AT1G49430 | LACS2 | LATERAL ROOT DEVELOPMENT 2 LRD2                                                                     | The cutin layer on the adaxial surface of mutant leaves was not significantly different in cross-sectional thickness from that of control wild-type leaves. However, the abaxial cutin layer on mutant leaves was substantially thinner than the wild type.                                                                                                                                                                                                                                                                                                                                                                                                                                                                                                                                                                                        | 14973169 | 2 | 2 |
| AT1G49430 | LACS2 | LATERAL ROOT DEVELOPMENT 2 LRD2                                                                     | The rate of chlorophyll leaching from mutant plants was threefold higher than the rate from wild-type controls.                                                                                                                                                                                                                                                                                                                                                                                                                                                                                                                                                                                                                                                                                                                                    | 14973169 | 1 | 1 |
| AT1G68480 | JAG   | JAGGED                                                                                              | Leaves have a serrated edge. Sepals and petals are narrower and shorter than wt. Mutant sepals develop jagged tissue at the tip. Anthers are reduced with an altered shape and produce less pollen than wt.                                                                                                                                                                                                                                                                                                                                                                                                                                                                                                                                                                                                                                        | 14973282 | 4 | 4 |
| AT1G19300 | GATL1 | GLZ1 PARVUS                                                                                         | At flowering, the mutants achieve a rosette diameter ca. 30% that of wild-type plants and an inflorescence stem height ca. 20% that of wild-type plants                                                                                                                                                                                                                                                                                                                                                                                                                                                                                                                                                                                                                                                                                            | 15010604 |   |   |
| AT1G19300 | GATL1 | GLZ1 PARVUS                                                                                         | Flowers are also significantly smaller than wild-type ones and have anthers that are almost completely non-dehiscent and fail to extend above the level of the stigma in fully open flowers.                                                                                                                                                                                                                                                                                                                                                                                                                                                                                                                                                                                                                                                       | 15010604 |   |   |
| AT1G19300 | GATL1 | GLZ1 PARVUS                                                                                         | No differences with respect to the frequency or timing of germination on soil, either in full light or in total darkness, and the rate and extent of hypocotyl elongation in dark-grown parvus seedlings are indistinguishable from that of wild-type seedlings.                                                                                                                                                                                                                                                                                                                                                                                                                                                                                                                                                                                   | 15010604 |   |   |
| AT1G19300 | GATL1 | GLZ1 PARVUS                                                                                         | Pollen grains from mutant anthers showed less than 0.5% germination in vitro in pollen growth medium, compared with 7% germination for wild-type Ler pollen.                                                                                                                                                                                                                                                                                                                                                                                                                                                                                                                                                                                                                                                                                       | 15010604 |   |   |
| AT1G19300 | GATL1 | GLZ1 PARVUS                                                                                         | Seed set is greatly reduced in parvus plants and most siliques either fail to develop or contain few (3-10) seeds.                                                                                                                                                                                                                                                                                                                                                                                                                                                                                                                                                                                                                                                                                                                                 | 15010604 |   |   |
| AT1G19300 | GATL1 | GLZ1 PARVUS                                                                                         | The phenotype of the parvus mutant is almost indistinguishable from that of wild-type plants when grown in vitro on agar. However, when grown in soil, parvus mutants are distinguished from wild-type plants after about 3 weeks due to their slightly narrower, darker green leaves.                                                                                                                                                                                                                                                                                                                                                                                                                                                                                                                                                             | 15010604 |   |   |
| AT1G19300 | GATL1 | GLZ1 PARVUS                                                                                         | pavement cells, stomatal guard cells and trichomes, on the adaxial and abaxial surface of mature mutant leaves are morphologically indistinguishable from those of wild-type leaves but are smaller in the parvus mutant (ca. 60% of wild type)                                                                                                                                                                                                                                                                                                                                                                                                                                                                                                                                                                                                    | 15010604 |   |   |
| AT1G31880 | BRX   | BREVIS RADIX NIP3:1 NLM9                                                                            | The roots of brxS seedlings are as short, both when grown in the light or in darkness. In contrast to the root system, the shoot system morphology and flowering time of brxS plants resembles the Sav-0 shoot system, which was used as the control. Cell elongation and cell production rate in the root meristematic and elongation zone were decreased in brxS seedlings, contributing approximately one-third and two-thirds, respectively, to the overall difference in root length as compared with Sav-0 seedlings.                                                                                                                                                                                                                                                                                                                        | 15031265 | 3 | 3 |
| AT2G01830 | WOL   | AHK4 ARABIDOPSIS HISTIDINE KINASE 4 ATCRE1 CRE1 CYTOKININ RESPONSE 1 WOL1 WOODEN LEG WOODEN LEG 1   | Wildtype roots.                                                                                                                                                                                                                                                                                                                                                                                                                                                                                                                                                                                                                                                                                                                                                                                                                                    | 15053761 | 1 | 1 |
| AT2G01830 | WOL   | AHK4 ARABIDOPSIS HISTIDINE KINASE 4 ATCRE1 CRE1 CYTOKININ RESPONSE 1 WOL1 WOODEN LEG WOODEN LEG 1   | Develops metaxylem as wildtype plants.                                                                                                                                                                                                                                                                                                                                                                                                                                                                                                                                                                                                                                                                                                                                                                                                             | 15053761 | 1 | 1 |
| AT2G01830 | WOL   | AHK4 ARABIDOPSIS HISTIDINE KINASE 4 ATCRE1 CRE1 CYTOKININ RESPONSE 1 WOL1 WOODEN LEG WOODEN LEG 1   | Excised hypocotyls develop small and yellowish calli indicating a strong insensitivity to kinetin, while wildtype calli are green-coloured.                                                                                                                                                                                                                                                                                                                                                                                                                                                                                                                                                                                                                                                                                                        | 15053761 | 1 | 1 |
| AT2G01830 | WOL   | AHK4 ARABIDOPSIS HISTIDINE KINASE 4 ATCRE1 CRE1 CYTOKININ RESPONSE 1 WOL1 WOODEN LEG WOODEN LEG 1   | Root elongation is indistinguishable from that of wildtype.                                                                                                                                                                                                                                                                                                                                                                                                                                                                                                                                                                                                                                                                                                                                                                                        | 15053761 | 1 | 1 |
| AT2G01830 | WOL   | AHK4 ARABIDOPSIS HISTIDINE KINASE 4 ATCRE1 CRE1 CYTOKININ RESPONSE 1 WOL1 WOODEN LEG WOODEN LEG 1   | Strong cytokinin insensitivity.                                                                                                                                                                                                                                                                                                                                                                                                                                                                                                                                                                                                                                                                                                                                                                                                                    | 15053761 | 1 | 1 |
| AT2G01830 | WOL   | AHK4 ARABIDOPSIS HISTIDINE KINASE 4 ATCRE1 CRE1 CYTOKININ RESPONSE 1 WOL1 WOODEN LEG WOODEN LEG 1   | Cytokinin insensitivity.                                                                                                                                                                                                                                                                                                                                                                                                                                                                                                                                                                                                                                                                                                                                                                                                                           | 15053761 | 1 | 1 |
| AT2G01830 | WOL   | AHK4 ARABIDOPSIS HISTIDINE KINASE 4 ATCRE1 CRE1 CYTOKININ RESPONSE 1 WOL1 WOODEN LEG WOODEN LEG 1   | No metaxylem and no phloem differentiation.                                                                                                                                                                                                                                                                                                                                                                                                                                                                                                                                                                                                                                                                                                                                                                                                        | 15053761 | 1 | 1 |
| AT2G01830 | WOL   | AHK4 ARABIDOPSIS HISTIDINE KINASE 4 ATCRE1 CRE1 CYTOKININ RESPONSE 1 WOL1 WOODEN LEG WOODEN LEG 1   | Root elongation markedly reduced in the presence of kinetin.                                                                                                                                                                                                                                                                                                                                                                                                                                                                                                                                                                                                                                                                                                                                                                                       | 15053761 | 1 | 1 |
| AT2G01830 | WOL   | AHK4 ARABIDOPSIS HISTIDINE KINASE 4 ATCRE1 CRE1 CYTOKININ RESPONSE 1 WOL1 WOODEN LEG WOODEN LEG 1   | In this line the wol-1 allele appears recessive compared to cre1-3.                                                                                                                                                                                                                                                                                                                                                                                                                                                                                                                                                                                                                                                                                                                                                                                | 15053761 | 1 | 1 |
| AT2G01830 | WOL   | AHK4 ARABIDOPSIS HISTIDINE KINASE 4 ATCRE1 CRE1 CYTOKININ RESPONSE 1 WOL1 WOODEN LEG WOODEN LEG 1   | Same phenotype as wol-1.                                                                                                                                                                                                                                                                                                                                                                                                                                                                                                                                                                                                                                                                                                                                                                                                                           | 15053761 | 1 | 1 |
| AT2G01830 | WOL   | AHK4 ARABIDOPSIS HISTIDINE KINASE 4 ATCRE1 CRE1 CYTOKININ RESPONSE 1 WOL1 WOODEN LEG WOODEN LEG 1   | Root cross-sections are identical to those of wildtype: observed re-appearance of a bipolar xylem strand and phloem tissue on each side.                                                                                                                                                                                                                                                                                                                                                                                                                                                                                                                                                                                                                                                                                                           | 15053761 | 1 | 1 |



|           |       |                                                                                                         |                                                                                                                                                                                                                                                                                                                                                                                                                                                                                                                                                                                                                                                                                                                                                                                                                                                                                                                                                                                                       |          |   |   |
|-----------|-------|---------------------------------------------------------------------------------------------------------|-------------------------------------------------------------------------------------------------------------------------------------------------------------------------------------------------------------------------------------------------------------------------------------------------------------------------------------------------------------------------------------------------------------------------------------------------------------------------------------------------------------------------------------------------------------------------------------------------------------------------------------------------------------------------------------------------------------------------------------------------------------------------------------------------------------------------------------------------------------------------------------------------------------------------------------------------------------------------------------------------------|----------|---|---|
| AT2G01830 | WOL   | AHK4 ARABIDOPSIS HISTIDINE KINASE 4<br>ATCRE1 CRE1 CYTOKININ RESPONSE 1<br>WOL1 WOODEN LEG WOODEN LEG 1 | Rapidly accumulate anthocyanins due to the loss of root functionality.                                                                                                                                                                                                                                                                                                                                                                                                                                                                                                                                                                                                                                                                                                                                                                                                                                                                                                                                | 15053761 | 1 | 1 |
| AT2G01830 | WOL   | AHK4 ARABIDOPSIS HISTIDINE KINASE 4<br>ATCRE1 CRE1 CYTOKININ RESPONSE 1<br>WOL1 WOODEN LEG WOODEN LEG 1 | Short root phenotype.                                                                                                                                                                                                                                                                                                                                                                                                                                                                                                                                                                                                                                                                                                                                                                                                                                                                                                                                                                                 | 15053761 | 1 | 1 |
| AT2G01830 | WOL   | AHK4 ARABIDOPSIS HISTIDINE KINASE 4<br>ATCRE1 CRE1 CYTOKININ RESPONSE 1<br>WOL1 WOODEN LEG WOODEN LEG 1 | Strong insensitivity to the hormone kinetin.                                                                                                                                                                                                                                                                                                                                                                                                                                                                                                                                                                                                                                                                                                                                                                                                                                                                                                                                                          | 15053761 | 1 | 1 |
| AT2G01830 | WOL   | AHK4 ARABIDOPSIS HISTIDINE KINASE 4<br>ATCRE1 CRE1 CYTOKININ RESPONSE 1<br>WOL1 WOODEN LEG WOODEN LEG 1 | Viability depends on the ability to develop adventitious root before plant dies.                                                                                                                                                                                                                                                                                                                                                                                                                                                                                                                                                                                                                                                                                                                                                                                                                                                                                                                      | 15053761 | 1 | 0 |
| AT2G03680 | SPR1  | SKU6                                                                                                    | Defective in directional cell elongation processes; abnormal cortical microtubule function; exhibits right-handed helical growth in roots and etiolated hypocotyls; epidermal cell files of roots are twisted to form right-handed helices; on vertically oriented hard agar plates, roots grow to the right when viewed from above the agar plates; this skewed root growth is driven by the friction between agar surface and helical epidermal cell files; phenotype is enhanced under the conditions that accelerate cell elongation, under such conditions, epidermal cells undergo isotropic cell expansion, resulting in spherically shaped cells protruding from the organ surface.                                                                                                                                                                                                                                                                                                           | 15084720 | 6 | 6 |
| AT1G66340 | ETR1  |                                                                                                         | The mutant exhibits a significant flg22-induced reduction in bacterial growth, indicating that the gene is most probably not required for flg22-induced bacterial resistance.                                                                                                                                                                                                                                                                                                                                                                                                                                                                                                                                                                                                                                                                                                                                                                                                                         | 15085136 |   |   |
| AT1G64280 | NPR1  | NIMI SAT1                                                                                               | The mutant exhibits a significant flg22-induced reduction in bacterial growth, indicating that the gene is most probably not required for flg22-induced bacterial resistance.                                                                                                                                                                                                                                                                                                                                                                                                                                                                                                                                                                                                                                                                                                                                                                                                                         | 15085136 | 2 | 2 |
| AT2G01830 | WOL   | AHK4 ARABIDOPSIS HISTIDINE KINASE 4<br>ATCRE1 CRE1 CYTOKININ RESPONSE 1<br>WOL1 WOODEN LEG WOODEN LEG 1 | Dwarf phenotype.                                                                                                                                                                                                                                                                                                                                                                                                                                                                                                                                                                                                                                                                                                                                                                                                                                                                                                                                                                                      | 15155880 | 1 | 1 |
| AT2G01830 | WOL   | AHK4 ARABIDOPSIS HISTIDINE KINASE 4<br>ATCRE1 CRE1 CYTOKININ RESPONSE 1<br>WOL1 WOODEN LEG WOODEN LEG 1 | The leaves of the triple mutant expand more slowly than those of wildtype. At 17 days after germination, their surface area is 20% that of wildtype plants.                                                                                                                                                                                                                                                                                                                                                                                                                                                                                                                                                                                                                                                                                                                                                                                                                                           | 15155880 | 2 | 1 |
| AT2G01830 | WOL   | AHK4 ARABIDOPSIS HISTIDINE KINASE 4<br>ATCRE1 CRE1 CYTOKININ RESPONSE 1<br>WOL1 WOODEN LEG WOODEN LEG 1 | The rate of leaf primordial formation is slightly decreased but the phyllotaxy is normal.                                                                                                                                                                                                                                                                                                                                                                                                                                                                                                                                                                                                                                                                                                                                                                                                                                                                                                             | 15155880 | 2 | 1 |
| AT1G27320 | AHK3  | ORE12                                                                                                   | Bolting time is slightly delayed (2 to 3 days) and the inflorescence stem length is reduced. However, morphology and fertility of the flowers is relatively unaffected.                                                                                                                                                                                                                                                                                                                                                                                                                                                                                                                                                                                                                                                                                                                                                                                                                               | 15155880 | 2 | 0 |
| AT1G27320 | AHK3  | ORE12                                                                                                   | Compact rosettes with shortened petioles and small leaf blades.                                                                                                                                                                                                                                                                                                                                                                                                                                                                                                                                                                                                                                                                                                                                                                                                                                                                                                                                       | 15155880 | 1 | 0 |
| AT1G27320 | AHK3  | ORE12                                                                                                   | Root elongation unaffected.                                                                                                                                                                                                                                                                                                                                                                                                                                                                                                                                                                                                                                                                                                                                                                                                                                                                                                                                                                           | 15155880 | 2 | 0 |
| AT1G27320 | AHK3  | ORE12                                                                                                   | Semi-dwarf phenotype.                                                                                                                                                                                                                                                                                                                                                                                                                                                                                                                                                                                                                                                                                                                                                                                                                                                                                                                                                                                 | 15155880 | 1 | 1 |
| AT1G27320 | AHK3  | ORE12                                                                                                   | The hypocotyl length of the double mutant is slightly decreased; this effect is largely due to reduction in cell number rather than cell size.                                                                                                                                                                                                                                                                                                                                                                                                                                                                                                                                                                                                                                                                                                                                                                                                                                                        | 15155880 | 2 | 0 |
| AT1G27320 | AHK3  | ORE12                                                                                                   | The leaves of the double mutant expand more slowly than those of wildtype. At 17days after germination, their surface area is 50% that of wildtype plants.                                                                                                                                                                                                                                                                                                                                                                                                                                                                                                                                                                                                                                                                                                                                                                                                                                            | 15155880 | 2 | 2 |
| AT1G27320 | AHK3  | ORE12                                                                                                   | Dwarf phenotype.                                                                                                                                                                                                                                                                                                                                                                                                                                                                                                                                                                                                                                                                                                                                                                                                                                                                                                                                                                                      | 15155880 | 1 | 1 |
| AT1G27320 | AHK3  | ORE12                                                                                                   | The leaves of the triple mutant expand more slowly than those of wildtype. At 17 days after germination, their surface area is 20% that of wildtype plants.                                                                                                                                                                                                                                                                                                                                                                                                                                                                                                                                                                                                                                                                                                                                                                                                                                           | 15155880 | 1 | 1 |
| AT1G27320 | AHK3  | ORE12                                                                                                   | The rate of leaf primordial formation is slightly decreased but the phyllotaxy is normal.                                                                                                                                                                                                                                                                                                                                                                                                                                                                                                                                                                                                                                                                                                                                                                                                                                                                                                             | 15155880 | 1 | 1 |
| AT1G27320 | AHK3  | ORE12                                                                                                   | Strong cytokinin-insensitive phenotype.                                                                                                                                                                                                                                                                                                                                                                                                                                                                                                                                                                                                                                                                                                                                                                                                                                                                                                                                                               | 15155880 | 1 | 1 |
| AT1G27320 | AHK3  | ORE12                                                                                                   | Seedlings appear normal.                                                                                                                                                                                                                                                                                                                                                                                                                                                                                                                                                                                                                                                                                                                                                                                                                                                                                                                                                                              | 15155880 | 1 | 1 |
| AT2G01570 | RGA   | GRS RGA1                                                                                                | Partial suppression of the dwarf phenotype.                                                                                                                                                                                                                                                                                                                                                                                                                                                                                                                                                                                                                                                                                                                                                                                                                                                                                                                                                           | 15155881 | 1 | 1 |
| AT2G03680 | SPR1  | SKU6                                                                                                    | Mutant plants exhibit altered patterns of root and organ growth as a result of defective anisotropic cell expansion. Roots, etiolated hypocotyls, and leaf petioles exhibit right-handed axial twisting, and root growth on inclined agar media is strongly right skewed. Cortical microtubules reoriented. The touch-dependent helical growth of roots is suppressed by the antimicrotubule drugs propryzamide and oryzalin, and right skewing is exacerbated by cold treatment.                                                                                                                                                                                                                                                                                                                                                                                                                                                                                                                     | 15155883 | 4 | 4 |
| AT2G01830 | WOL   | AHK4 ARABIDOPSIS HISTIDINE KINASE 4<br>ATCRE1 CRE1 CYTOKININ RESPONSE 1<br>WOL1 WOODEN LEG WOODEN LEG 1 | Normal or slightly reduced sensitivity to cytokinin in shoot induction assay (exogenous application of cytokinins induces wildtype shoot formation).                                                                                                                                                                                                                                                                                                                                                                                                                                                                                                                                                                                                                                                                                                                                                                                                                                                  | 15166290 | 1 | 0 |
| AT1G27320 | AHK3  | ORE12                                                                                                   | Normal or slightly reduced sensitivity to cytokinin in shoot induction assay (exogenous application of cytokinins induces wildtype shoot formation).                                                                                                                                                                                                                                                                                                                                                                                                                                                                                                                                                                                                                                                                                                                                                                                                                                                  | 15166290 | 1 | 1 |
| AT2G02560 | CAND1 | ETA2 HVE                                                                                                | Similar to Atcand1-1 mutant. Resistant to sirtinol and auxin, but not to gibberellins or brassinolide. Displayed developmental phenotypes similar to those of axrl, namely, short petioles, downwardly curling leaves, shorter inflorescence. More severe inflorescence phenotype were found in this mutant compared to the atcand1-1 (ems-generated) mutation. Mutant plants were completely sterile.                                                                                                                                                                                                                                                                                                                                                                                                                                                                                                                                                                                                | 15181201 | 4 | 4 |
| AT2G02560 | CAND1 | ETA2 HVE                                                                                                | Mutants resistant to sirtinol and auxin, but not to gibberellins or brassinolide. Displayed developmental phenotypes similar to those of axrl, namely, short petioles, downwardly curling leaves, short inflorescence, and reduced fertility.                                                                                                                                                                                                                                                                                                                                                                                                                                                                                                                                                                                                                                                                                                                                                         | 15181201 | 4 | 3 |
| AT2G02560 | CAND1 | ETA2 HVE                                                                                                | Similar to cand1-2 and cand1-3 mutants. Rosette leaves of mutants plants were much smaller than those of wild-type plants and had a wavy morphology. Mutants flowered later than wild-type plants, with an increased number of rosette leaves indicating that the vegetative to reproductive growth transition of the primary shoot apical meristem was affected. The growth of axillary meristems is also abnormal, where a large number of smaller leaves are produced. Furthermore, the mutants have very low fertility, with less than one seed produced on average per silique. Mutant plants continued to make new flowers while wild-type plants of the same age started to senesce. Other notable phenotypes of cand1 mutants include dwarfism and loss of apical dominance. When examined closely, dwarfism largely results from reduced stem elongation. Mutant plants had a strong increase in the number of secondary inflorescences, an indication that they have lost apical dominance. | 15208391 | 8 | 6 |
| AT2G02560 | CAND1 | ETA2 HVE                                                                                                | When grown in darkness, mutant seedlings exhibited mild photomorphogenic phenotypes, with short hypocotyls and opened cotyledons.                                                                                                                                                                                                                                                                                                                                                                                                                                                                                                                                                                                                                                                                                                                                                                                                                                                                     | 15208391 | 2 | 2 |
| AT2G03800 | GEK1  | GERO1                                                                                                   | Ethanol hypersensitivity.                                                                                                                                                                                                                                                                                                                                                                                                                                                                                                                                                                                                                                                                                                                                                                                                                                                                                                                                                                             | 15215505 |   |   |
| AT2G03800 | GEK1  | GERO1                                                                                                   | When the mutant seedlings grown on normal medium were transferred to medium containing 0.03-0.1% (v/v) ethanol, their growth was reduced strongly.                                                                                                                                                                                                                                                                                                                                                                                                                                                                                                                                                                                                                                                                                                                                                                                                                                                    | 15215505 |   |   |
| AT2G03800 | GEK1  | GERO1                                                                                                   | The germination rates of the mutant were significantly reduced by 0.003% (v/v, 0.5 mM) ethanol, whereas the wild type germinated normally in the presence of at least 0.3% (v/v) ethanol.                                                                                                                                                                                                                                                                                                                                                                                                                                                                                                                                                                                                                                                                                                                                                                                                             | 15215505 |   |   |
| AT2G03800 | GEK1  | GERO1                                                                                                   | The mutant died eventually in the presence of 0.1% ethanol.                                                                                                                                                                                                                                                                                                                                                                                                                                                                                                                                                                                                                                                                                                                                                                                                                                                                                                                                           | 15215505 |   |   |
| AT1G02120 | VAD1  | VASCULAR ASSOCIATED DEATH1                                                                              | lesion mimic mutant; exhibits light conditional appearance of propagative HR (hypersensitive response)-like lesions along the vascular system.                                                                                                                                                                                                                                                                                                                                                                                                                                                                                                                                                                                                                                                                                                                                                                                                                                                        | 15269331 | 2 | 1 |
| AT1G01550 | BPS1  |                                                                                                         | Mutant roots were abnormal; primary and lateral roots were short, root hairs formed close to the root apex, and root defects were most severe when plants were grown at low temperature.                                                                                                                                                                                                                                                                                                                                                                                                                                                                                                                                                                                                                                                                                                                                                                                                              | 15458645 |   |   |
| AT1G01550 | BPS1  |                                                                                                         | Mutants produced two radially symmetric organs in the place of leaves; these organs were typically devoid of vascular tissue and lacked trichomes. Prolonged 16°C growth did not result in additional organs being produced, indicating that shoot meristem (SAM) activity was also lost. Mutants grown at 22°C showed a similar, albeit less severe, phenotype. The first leaf pair was slightly larger and flatter than those of 16°C-grown mutants and contained some vascular tissue, and additional radial organs were produced by the SAM. Mutants grown at 29°C showed an even less-severe phenotype; these plants produced flattened, irregularly shaped leaves with slightly lobed margins and an abnormal vein pattern.                                                                                                                                                                                                                                                                     | 15458645 |   |   |
| AT1G09570 | PHYA  | ELONGATED HYPOCOTYL 8 FAR RED ELONGATED 1 FAR RED ELONGATED HYPOCOTYL 2 PHY2 FRE1 HY8<br>phyTochrome A  | When treated with a short pulse of far-red light after seed surface sterilization, double mutant seeds germinated, while majority of wild-type seeds did not.                                                                                                                                                                                                                                                                                                                                                                                                                                                                                                                                                                                                                                                                                                                                                                                                                                         | 15486102 | 2 | 2 |
| AT1G09530 | PIF3  | BHLH8 EN100 PAP3                                                                                        | When grown under red light, double mutants had a short hypocotyl length similar to that of the pif3 single mutant, whereas the pif5 pif3 double mutant grown under far-red light had short hypocotyl length similar to that of the pif5 single mutant. Compared with wild-type seedlings, higher percentages of double mutant seedlings grew flat in the dark, i.e., inhibition of hypocotyl negative gravitropism was observed in the dark in the double mutant (similar to pif5 single mutant).                                                                                                                                                                                                                                                                                                                                                                                                                                                                                                     | 15486102 | 2 | 2 |
| AT2G03710 | AGL3  |                                                                                                         | 4-Sep Flower meristems behave like inflorescence meristems and continuously elaborate new meristems, resulting in the 'cauliflower' phenotype. Eventually flowers resembling those of apl single mutants eventually appear and set seeds.                                                                                                                                                                                                                                                                                                                                                                                                                                                                                                                                                                                                                                                                                                                                                             | 15530395 |   |   |
| AT2G03710 | AGL3  |                                                                                                         | 4-Sep Inflorescences take 7-10 days longer than apl cal mutant to begin producing flowers.                                                                                                                                                                                                                                                                                                                                                                                                                                                                                                                                                                                                                                                                                                                                                                                                                                                                                                            | 15530395 |   |   |

|           |         |                                                                                   |       |                                                                                                                                                                                                                                                                                                                                                                                                                                                                                                                                                                                                                                                                                                                                                                                                                                                                                                                          |          |   |   |
|-----------|---------|-----------------------------------------------------------------------------------|-------|--------------------------------------------------------------------------------------------------------------------------------------------------------------------------------------------------------------------------------------------------------------------------------------------------------------------------------------------------------------------------------------------------------------------------------------------------------------------------------------------------------------------------------------------------------------------------------------------------------------------------------------------------------------------------------------------------------------------------------------------------------------------------------------------------------------------------------------------------------------------------------------------------------------------------|----------|---|---|
| AT2G03710 | AGL3    |                                                                                   | 4-Sep | Meristem defect intermediate between that of apl and apl cal mutants. Inflorescences appear cauliflower-like early after bolting but soon start producing apl-like flowers on their periphery.                                                                                                                                                                                                                                                                                                                                                                                                                                                                                                                                                                                                                                                                                                                           | 15530395 |   |   |
| AT2G03710 | AGL3    |                                                                                   | 4-Sep | Early flower mutant phenotypes are lessened in later-arising flowers which appear more normal whilst still displaying significant perturbations of organ development.                                                                                                                                                                                                                                                                                                                                                                                                                                                                                                                                                                                                                                                                                                                                                    | 15530395 |   |   |
| AT2G03710 | AGL3    |                                                                                   | 4-Sep | Gynoecium often supported by an elongated gynophore.                                                                                                                                                                                                                                                                                                                                                                                                                                                                                                                                                                                                                                                                                                                                                                                                                                                                     | 15530395 |   |   |
| AT2G03710 | AGL3    |                                                                                   | 4-Sep | Many flowers display a loss of fourth whorl determinancy.                                                                                                                                                                                                                                                                                                                                                                                                                                                                                                                                                                                                                                                                                                                                                                                                                                                                | 15530395 |   |   |
| AT2G03710 | AGL3    |                                                                                   | 4-Sep | Profound changes in early arising flowers. Both organ numbers and organ identity are affected in a highly variable manner.                                                                                                                                                                                                                                                                                                                                                                                                                                                                                                                                                                                                                                                                                                                                                                                               | 15530395 |   |   |
| AT2G03710 | AGL3    |                                                                                   | 4-Sep | Stellate trichomes are frequently observed on carpels (never on wild-type).                                                                                                                                                                                                                                                                                                                                                                                                                                                                                                                                                                                                                                                                                                                                                                                                                                              | 15530395 |   |   |
| AT2G03710 | AGL3    |                                                                                   | 4-Sep | All flower organs are converted to leaf-like organs, most strikingly on their adaxial surface. Abaxial epidermal cells are made up of a mixture of leaf- and sepal-like characteristics. Leaf characteristics include an abundance of branched trichomes.                                                                                                                                                                                                                                                                                                                                                                                                                                                                                                                                                                                                                                                                | 15530395 |   |   |
| AT2G03710 | AGL3    |                                                                                   | 4-Sep | Adaxial surface of first whorl organs are unaffected.                                                                                                                                                                                                                                                                                                                                                                                                                                                                                                                                                                                                                                                                                                                                                                                                                                                                    | 15530395 |   |   |
| AT1G69120 | AP1     | AGAMOUS-like 7 AGL7 APETALA1 ATAP1                                                |       | Flower meristems behave like inflorescence meristems and continuously elaborate new meristems, resulting in the 'cauliflower' phenotype. Eventually flowers resembling those of apl single mutants eventually appear and set seeds.                                                                                                                                                                                                                                                                                                                                                                                                                                                                                                                                                                                                                                                                                      | 15530395 |   |   |
| AT1G69120 | AP1     | AGAMOUS-like 7 AGL7 APETALA1 ATAP1                                                |       | Inflorescences take 7-10 days longer than apl cal mutant to begin producing flowers.                                                                                                                                                                                                                                                                                                                                                                                                                                                                                                                                                                                                                                                                                                                                                                                                                                     | 15530395 |   |   |
| AT1G69120 | AP1     | AGAMOUS-like 7 AGL7 APETALA1 ATAP1                                                |       | Meristem defect intermediate between that of apl and apl cal mutants. Inflorescences appear cauliflower-like early after bolting but soon start producing apl-like flowers on their periphery.                                                                                                                                                                                                                                                                                                                                                                                                                                                                                                                                                                                                                                                                                                                           | 15530395 |   |   |
| AT1G69120 | AP1     | AGAMOUS-like 7 AGL7 APETALA1 ATAP1                                                |       | Development of flowers in the axils of first-whorl organs.                                                                                                                                                                                                                                                                                                                                                                                                                                                                                                                                                                                                                                                                                                                                                                                                                                                               | 15530395 |   |   |
| AT1G26310 | CAL     | AGL10                                                                             |       | Flower meristems behave like inflorescence meristems and continuously elaborate new meristems, resulting in the 'cauliflower' phenotype. Eventually flowers resembling those of apl single mutants eventually appear and set seeds.                                                                                                                                                                                                                                                                                                                                                                                                                                                                                                                                                                                                                                                                                      | 15530395 |   |   |
| AT1G26310 | CAL     | AGL10                                                                             |       | Inflorescences take 7-10 days longer than apl cal mutant to begin producing flowers.                                                                                                                                                                                                                                                                                                                                                                                                                                                                                                                                                                                                                                                                                                                                                                                                                                     | 15530395 |   |   |
| AT1G24260 |         |                                                                                   |       | Early flower mutant phenotypes are lessened in later-arising flowers which appear more normal whilst still displaying significant perturbations of organ development.                                                                                                                                                                                                                                                                                                                                                                                                                                                                                                                                                                                                                                                                                                                                                    | 15530395 |   |   |
| AT1G24260 |         |                                                                                   |       | Gynoecium often supported by an elongated gynophore.                                                                                                                                                                                                                                                                                                                                                                                                                                                                                                                                                                                                                                                                                                                                                                                                                                                                     | 15530395 |   |   |
| AT1G24260 |         |                                                                                   |       | Many flowers display a loss of fourth whorl determinancy.                                                                                                                                                                                                                                                                                                                                                                                                                                                                                                                                                                                                                                                                                                                                                                                                                                                                | 15530395 |   |   |
| AT1G24260 |         |                                                                                   |       | Profound changes in early arising flowers. Both organ numbers and organ identity are affected in a highly variable manner.                                                                                                                                                                                                                                                                                                                                                                                                                                                                                                                                                                                                                                                                                                                                                                                               | 15530395 |   |   |
| AT1G24260 |         |                                                                                   |       | Stellate trichomes are frequently observed on carpels (never on wild-type).                                                                                                                                                                                                                                                                                                                                                                                                                                                                                                                                                                                                                                                                                                                                                                                                                                              | 15530395 |   |   |
| AT1G24260 |         |                                                                                   |       | Adaxial epidermal cells have a slightly irregular edge, indicating a partial adoption of leaf fate.                                                                                                                                                                                                                                                                                                                                                                                                                                                                                                                                                                                                                                                                                                                                                                                                                      | 15530395 |   |   |
| AT1G24260 |         |                                                                                   |       | All flower organs are converted to leaf-like organs, most strikingly on their adaxial surface. Abaxial epidermal cells are made up of a mixture of leaf- and sepal-like characteristics. Leaf characteristics include an abundance of branched trichomes.                                                                                                                                                                                                                                                                                                                                                                                                                                                                                                                                                                                                                                                                | 15530395 |   |   |
| AT1G24260 |         |                                                                                   |       | Normal flowers apart from a reduction in the number of stamens.                                                                                                                                                                                                                                                                                                                                                                                                                                                                                                                                                                                                                                                                                                                                                                                                                                                          | 15530395 |   |   |
| AT1G24260 |         |                                                                                   |       | Adaxial surface of first whorl organs are unaffected.                                                                                                                                                                                                                                                                                                                                                                                                                                                                                                                                                                                                                                                                                                                                                                                                                                                                    | 15530395 |   |   |
| AT1G29260 | PEX7    |                                                                                   |       | Displays peroxisomal defects such as reduced sensitivity to exogenously applied IBA. Fewer lateral roots after IBA treatment. Not generally defective in auxin responses. Hypocotyl is not markedly shorter than WT when grown without added sucrose in the dark. PIS2-tagged proteins are not efficiently imported into the peroxisome.                                                                                                                                                                                                                                                                                                                                                                                                                                                                                                                                                                                 | 15548601 | 5 | 3 |
| AT1G04580 | AAO4    | AO2                                                                               |       | The endogenous levels of ABA are significantly lower than those of the aao3 single mutant.                                                                                                                                                                                                                                                                                                                                                                                                                                                                                                                                                                                                                                                                                                                                                                                                                               | 15574845 | 1 | 0 |
| AT1G04580 | AAO4    | AO2                                                                               |       | No significant changes in ABA levels were observed.                                                                                                                                                                                                                                                                                                                                                                                                                                                                                                                                                                                                                                                                                                                                                                                                                                                                      | 15574845 | 1 | 1 |
| AT1G11130 | LRR-RLK |                                                                                   |       | Position of root-hair cells is scrambled. Only 66% of epidermal cells (compared with 92% in wild type) overlying two cortical cells develop as root hairs, and 21% of epidermal cells overlying one cortical cell (compared with 1% in wild type) develop as root hairs.                                                                                                                                                                                                                                                                                                                                                                                                                                                                                                                                                                                                                                                 | 15618487 |   |   |
| AT1G55350 | DEK1    | ATDEK1 DEFECTIVE KERNEL 1 EMB1275 EMB80 embryo defective 1275 EMBRYO DEFECTIVE 80 |       | Severity of the phenotype varied between individual mutant seed. In the most severely affected seed, no embryo development could be detected. In such seeds the endosperm develops and cellularizes but fails to differentiate a complete peripheral (aleurone-like) surface layer. In less severe mutant seed, embryos develop to the globular stage before developmental arrest. In these embryos the plane of cell division is frequently uncontrolled compared to wild-type, the embryo proper is irregular, lacking a well defined L1 cell layer. In mutant seed developing an embryo, the endosperm completes the cellularization process and differentiates an aleurone-like layer in the micropylar chamber around the embryo, but this differentiation frequently stops towards the central chamber. Wild-type development occurs in about 75% of seeds of the siliques from which mutant seeds were harvested. | 15647902 |   |   |
| AT1G26830 | CUL3A   | CUL3                                                                              |       | Mutant plants flowered slightly later than wild type and had a reduced sensitivity of the inhibition of hypocotyl growth in far-red light                                                                                                                                                                                                                                                                                                                                                                                                                                                                                                                                                                                                                                                                                                                                                                                | 15659098 |   |   |
| AT1G59750 | ARF1    |                                                                                   |       | no obvious auxin-related growth phenotype                                                                                                                                                                                                                                                                                                                                                                                                                                                                                                                                                                                                                                                                                                                                                                                                                                                                                | 15659631 | 1 | 1 |
| AT1G35520 | ARF15   |                                                                                   |       | no obvious auxin-related growth phenotype                                                                                                                                                                                                                                                                                                                                                                                                                                                                                                                                                                                                                                                                                                                                                                                                                                                                                | 15659631 | 1 | 1 |
| AT1G35240 | ARF20   |                                                                                   |       | no obvious auxin-related growth phenotype                                                                                                                                                                                                                                                                                                                                                                                                                                                                                                                                                                                                                                                                                                                                                                                                                                                                                | 15659631 | 1 | 1 |
| AT1G34410 | ARF21   |                                                                                   |       | no obvious auxin-related growth phenotype                                                                                                                                                                                                                                                                                                                                                                                                                                                                                                                                                                                                                                                                                                                                                                                                                                                                                | 15659631 | 1 | 1 |
| AT1G34390 | ARF22   |                                                                                   |       | no obvious auxin-related growth phenotype                                                                                                                                                                                                                                                                                                                                                                                                                                                                                                                                                                                                                                                                                                                                                                                                                                                                                | 15659631 | 1 | 1 |
| AT1G34170 | ARF13   |                                                                                   |       | no obvious auxin-related growth phenotype                                                                                                                                                                                                                                                                                                                                                                                                                                                                                                                                                                                                                                                                                                                                                                                                                                                                                | 15659631 | 1 | 1 |
| AT1G30330 | ARF6    |                                                                                   |       | nph-1 arf19 double mutant; agravitropic response in both hypocotyls and roots; impaired phototropic response in hypocotyls; impaired lateral root formation; small plant size; small and epinastic rosette leaves; reduced auxin sensitivity                                                                                                                                                                                                                                                                                                                                                                                                                                                                                                                                                                                                                                                                             | 15659631 | 1 | 1 |
| AT1G19220 | ARF19   |                                                                                   |       | The primary roots of the mutant produce as many lateral roots as the wild type.                                                                                                                                                                                                                                                                                                                                                                                                                                                                                                                                                                                                                                                                                                                                                                                                                                          | 15659631 | 1 | 1 |
| AT1G19220 | ARF19   |                                                                                   |       | When seedlings are grown vertically under dark conditions, the mutant has a normal gravitropic response.                                                                                                                                                                                                                                                                                                                                                                                                                                                                                                                                                                                                                                                                                                                                                                                                                 | 15659631 | 1 | 0 |
| AT1G19220 | ARF19   |                                                                                   |       | no obvious auxin-related growth phenotype, but roots show mild auxin resistance                                                                                                                                                                                                                                                                                                                                                                                                                                                                                                                                                                                                                                                                                                                                                                                                                                          | 15659631 | 2 | 2 |
| AT1G19220 | ARF19   |                                                                                   |       | The double mutant exhibits much stronger auxin-related phenotypes than those of the single mutants. Adult double mutant plants have thin and short inflorescence stems, and their rosette leaves are small and epinastic. In addition, it has reduced numbers of inflorescence stems, suggesting enhanced apical dominance. By contrast, its flowers appear to be normal, and they fertilize normally.                                                                                                                                                                                                                                                                                                                                                                                                                                                                                                                   | 15659631 | 4 | 0 |
| AT1G19220 | ARF19   |                                                                                   |       | The double mutant displays agravitropic responses in both hypocotyls and roots. When seedlings are grown vertically under dark conditions, the regulation of growth orientation is disrupted in both hypocotyls and roots, with the hypocotyls occasionally growing downward and the roots upward. Also, the roots and hypocotyls of the double mutant show reduced gravitropic curvatures compared with the wild type when vertically dark-grown seedlings are reoriented by 90°.                                                                                                                                                                                                                                                                                                                                                                                                                                       | 15659631 | 3 | 3 |
| AT1G19220 | ARF19   |                                                                                   |       | The phenotype of the double mutant is most obvious at its seedling stage, with its most prominent phenotype being severely impaired lateral root formation. Its primary roots fail to produce lateral roots in 2-week-old seedlings. However, double mutant seedlings start to generate several lateral roots after ~2 weeks of growth, and their morphological appearance is normal.                                                                                                                                                                                                                                                                                                                                                                                                                                                                                                                                    | 15659631 | 3 | 3 |
| AT1G19220 | ARF19   |                                                                                   |       | The phototropic response toward blue light in hypocotyls of double mutant seedlings is disrupted.                                                                                                                                                                                                                                                                                                                                                                                                                                                                                                                                                                                                                                                                                                                                                                                                                        | 15659631 | 1 | 0 |
| AT1G19220 | ARF19   |                                                                                   |       | nph-1 arf19 double mutant; agravitropic response in both hypocotyls and roots; impaired phototropic response in hypocotyls; impaired lateral root formation; small plant size; small and epinastic rosette leaves; reduced auxin sensitivity                                                                                                                                                                                                                                                                                                                                                                                                                                                                                                                                                                                                                                                                             | 15659631 | 1 | 1 |
| AT1G74310 | HSP101  | ATHSP101 heat shock protein 101 HEAT SHOCK PROTEIN ATHSP101 HOT1                  |       | Defective thermotolerance. Plants treated at 38C are not able to acclimate to 45C temperature.                                                                                                                                                                                                                                                                                                                                                                                                                                                                                                                                                                                                                                                                                                                                                                                                                           | 15659638 | 1 | 1 |
| AT1G60600 | ABC4    |                                                                                   |       | Pale green seedlings. Can only be grown on media. Chloroplasts have increased grana stacks and fewer stroma thylakoids. Decreased photosynthetic efficiency.                                                                                                                                                                                                                                                                                                                                                                                                                                                                                                                                                                                                                                                                                                                                                             | 15686525 | 3 | 2 |
| AT1G20980 | SPL14   | FBR6 SPL1R2                                                                       |       | Mutants are resistant to fumonisin B1. In the absence of FBI, the plants have elongated petioles and enhanced leaf margin serration. Plants appear to undergo early vegetative phase change.                                                                                                                                                                                                                                                                                                                                                                                                                                                                                                                                                                                                                                                                                                                             | 15703061 | 3 | 2 |
| AT1G20330 | SMT2    | CVP1                                                                              |       | Serrated petals and sepals. Fertility is 40% that of wildtype.                                                                                                                                                                                                                                                                                                                                                                                                                                                                                                                                                                                                                                                                                                                                                                                                                                                           | 15737981 | 2 | 1 |
| AT1G03310 | ISA2    | DBE1                                                                              |       | Accumulates reduced amounts of starch relative to wildtype but large amounts of soluble glucan.                                                                                                                                                                                                                                                                                                                                                                                                                                                                                                                                                                                                                                                                                                                                                                                                                          | 15743447 | 1 | 1 |



|           |         |                                                                      |                                                                                                                                                                                                                                                                                                                                                                                                                                                                                                                                                                                                                                                                                                                                                                                                                                                                                                                                                                                                                                                                                                                                                                                                                                                                                                                                                                                                                                                                                                                                                                                                        |          |   |   |
|-----------|---------|----------------------------------------------------------------------|--------------------------------------------------------------------------------------------------------------------------------------------------------------------------------------------------------------------------------------------------------------------------------------------------------------------------------------------------------------------------------------------------------------------------------------------------------------------------------------------------------------------------------------------------------------------------------------------------------------------------------------------------------------------------------------------------------------------------------------------------------------------------------------------------------------------------------------------------------------------------------------------------------------------------------------------------------------------------------------------------------------------------------------------------------------------------------------------------------------------------------------------------------------------------------------------------------------------------------------------------------------------------------------------------------------------------------------------------------------------------------------------------------------------------------------------------------------------------------------------------------------------------------------------------------------------------------------------------------|----------|---|---|
| AT1G18450 | ARP4    |                                                                      | arp4-1 mutation causes partial sterility. Homozygous mutants had poorly developed siliques with a few or no seeds, compared with heterozygous mutant or wild type siliques that were fully filled with seeds. Flowers on the homozygous sterile plants were often slightly smaller and open for considerably longer periods than wild type, and a majority of them (80 to 90%) remained unfertilized. Otherwise, mutant plants revealed only mild very morphological and developmental phenotypes. The anthers from the sterile plants were often smaller, more heart shaped, and contained fewer pollen grains compared with wild type anthers, which were somewhat oblong and fully filled with pollen. In addition, the mutant pollen grains were slightly larger than wild type. Because the mutant stamens often had shorter filaments than the wild type self-pollination was seldom efficient. However, upon manual pollination, pollen from the homozygous mutant plants germinated on self or wild type stigmas and produced fertile seeds, indicating that the mutant pollen grains, although larger, were viable. When homozygous mutant plant was pollinated with wild type pollen, the cross-pollination resulted in near normal development of siliques and production of seeds suggesting that the female development was not affected by the arp4-1 mutation. Sterility in the homozygous mutant plants is the result of production of fewer pollen and inefficient self-pollination. Mutant plants had a 35 to 40% reduction in the amount of AtARP4 protein compared with wild type. | 15743449 | 1 | 1 |
| AT1G06290 | ACX3    |                                                                      | Plants display decreased sensitivity to the inhibitory effect of indole-3-butyric acid (IBA) on root elongation, while remaining sensitive to inhibitory concentrations of indole-3-acetic acid. They maintain their ability to initiate lateral roots in response to IBA.                                                                                                                                                                                                                                                                                                                                                                                                                                                                                                                                                                                                                                                                                                                                                                                                                                                                                                                                                                                                                                                                                                                                                                                                                                                                                                                             | 15743450 | 1 | 1 |
| AT1G69670 | CUL3B   |                                                                      | Segregates about 17% embryo lethal. Embryos about around the transition stage.                                                                                                                                                                                                                                                                                                                                                                                                                                                                                                                                                                                                                                                                                                                                                                                                                                                                                                                                                                                                                                                                                                                                                                                                                                                                                                                                                                                                                                                                                                                         | 15772280 | 2 | 2 |
| AT1G26830 | CUL3A   | CUL3                                                                 | Segregates about 17% embryo lethal. Embryos about around the transition stage.                                                                                                                                                                                                                                                                                                                                                                                                                                                                                                                                                                                                                                                                                                                                                                                                                                                                                                                                                                                                                                                                                                                                                                                                                                                                                                                                                                                                                                                                                                                         | 15772280 | 2 | 2 |
| AT1G17060 | CYP72C1 | CHI2 DLF SHK1 SOB7                                                   | Dwarf plants with short hypocotyls in light and dark. Plants have dark green leaves with rounded blades, short stems and internodes, reduced apical dominance and delayed senescence. Seeds are smaller (shorter) than non-mutant siblings. Mutants have reduced levels of endogenous brassinosteroids.                                                                                                                                                                                                                                                                                                                                                                                                                                                                                                                                                                                                                                                                                                                                                                                                                                                                                                                                                                                                                                                                                                                                                                                                                                                                                                | 15773850 | 4 | 1 |
| AT1G17060 | CYP72C1 | CHI2 DLF SHK1 SOB7                                                   | Double mutant of BAS1 and SOB both of which are null alleles. Less responsive to light as measured by hypocotyl elongation and enhanced cotyledon expansion in red, blue and far red light meaning they are less responsive. Early flowering. Increased levels of 6-deoxythasterol and catasterone, which are products of the brassinolide pathway.                                                                                                                                                                                                                                                                                                                                                                                                                                                                                                                                                                                                                                                                                                                                                                                                                                                                                                                                                                                                                                                                                                                                                                                                                                                    | 15773851 | 2 | 2 |
| AT1G26670 | VTI12   | VTI1B                                                                | Zipl dominantly suppresses the zigzag phenotype of the zipl mutant. The zipl gain of function allele results in ectopic expression of VTI12 which forms complexes with SYP22. Corrects the gravitropism defect of zipl homozygotes.                                                                                                                                                                                                                                                                                                                                                                                                                                                                                                                                                                                                                                                                                                                                                                                                                                                                                                                                                                                                                                                                                                                                                                                                                                                                                                                                                                    | 15797025 |   |   |
| AT1G29690 | CAD1    |                                                                      | Germinating <i>cad1</i> mutant shows a dwarf phenotype with normal cotyledons but dark-brown- or black-colored cell death lesions on the true leaves. Leaf senescence with chlorophyll breakdown is accelerated in this mutant. This phenotype segregates as a recessive trait. Homozygous <i>cad1</i> mutant cannot produce seeds indicating that normal plant development are also disturbed by the mutation.                                                                                                                                                                                                                                                                                                                                                                                                                                                                                                                                                                                                                                                                                                                                                                                                                                                                                                                                                                                                                                                                                                                                                                                        | 15799997 | 3 | 3 |
| AT1G22620 | SAC1    | FIG4 FRA7                                                            | Defective interfascicular fiber cells in inflorescence stems. Decrease in cell wall synthesis, reduction in cell elongation, and alteration in the normal organization of the actin cytoskeleton. Global change in plant architecture.                                                                                                                                                                                                                                                                                                                                                                                                                                                                                                                                                                                                                                                                                                                                                                                                                                                                                                                                                                                                                                                                                                                                                                                                                                                                                                                                                                 | 15805481 | 3 | 3 |
| AT1G65620 | LBD6    | AS2                                                                  | Rosette leaves are lobed and curled downwards and have shorter petioles. Both the cauline leaves and sepals show serrations at margins.                                                                                                                                                                                                                                                                                                                                                                                                                                                                                                                                                                                                                                                                                                                                                                                                                                                                                                                                                                                                                                                                                                                                                                                                                                                                                                                                                                                                                                                                | 15821980 |   |   |
| AT2G13680 | CalS5   |                                                                      | severely reduced silique length and seed yield                                                                                                                                                                                                                                                                                                                                                                                                                                                                                                                                                                                                                                                                                                                                                                                                                                                                                                                                                                                                                                                                                                                                                                                                                                                                                                                                                                                                                                                                                                                                                         | 15842618 | 1 | 1 |
| AT1G02280 |         |                                                                      | Defective in POR B uptake into chloroplasts                                                                                                                                                                                                                                                                                                                                                                                                                                                                                                                                                                                                                                                                                                                                                                                                                                                                                                                                                                                                                                                                                                                                                                                                                                                                                                                                                                                                                                                                                                                                                            | 15842619 | 1 | 1 |
| AT1G03310 | ISA2    | DBE1                                                                 | Modification of amylopectine structure. Strong increase of number of small chain (degree of polymerisation between 5 and 9) and decrease in number of longer chains (11-17 degree of polymerisation).                                                                                                                                                                                                                                                                                                                                                                                                                                                                                                                                                                                                                                                                                                                                                                                                                                                                                                                                                                                                                                                                                                                                                                                                                                                                                                                                                                                                  | 15849301 | 1 | 1 |
| AT1G03310 | ISA2    | DBE1                                                                 | Reduced starch in leaves                                                                                                                                                                                                                                                                                                                                                                                                                                                                                                                                                                                                                                                                                                                                                                                                                                                                                                                                                                                                                                                                                                                                                                                                                                                                                                                                                                                                                                                                                                                                                                               | 15849301 | 1 | 1 |
| AT1G03310 | ISA2    | DBE1                                                                 | Strong increase in water soluble polysaccharides (WSPs) content.                                                                                                                                                                                                                                                                                                                                                                                                                                                                                                                                                                                                                                                                                                                                                                                                                                                                                                                                                                                                                                                                                                                                                                                                                                                                                                                                                                                                                                                                                                                                       | 15849301 | 1 | 1 |
| AT1G03310 | ISA2    | DBE1                                                                 | Strong reduction in starch accumulation in double mutant.                                                                                                                                                                                                                                                                                                                                                                                                                                                                                                                                                                                                                                                                                                                                                                                                                                                                                                                                                                                                                                                                                                                                                                                                                                                                                                                                                                                                                                                                                                                                              | 15849301 | 1 | 1 |
| AT1G10760 |         |                                                                      | impaired freezing tolerance                                                                                                                                                                                                                                                                                                                                                                                                                                                                                                                                                                                                                                                                                                                                                                                                                                                                                                                                                                                                                                                                                                                                                                                                                                                                                                                                                                                                                                                                                                                                                                            | 15894744 | 1 | 1 |
| AT1G11720 | SS3     | ATSS3 starch synthase 3 STARCH SYNTHASE III                          | Starch excess phenotype in leaves. Altered structure of leaf amylopectin. Increased phosphate content of starch in leaves. It is hypothesized that all of these phenomena result from the increase of activity in one or more of the other starch synthase isoforms upon loss of starch synthase III.                                                                                                                                                                                                                                                                                                                                                                                                                                                                                                                                                                                                                                                                                                                                                                                                                                                                                                                                                                                                                                                                                                                                                                                                                                                                                                  | 15908598 | 3 | 1 |
| AT1G67500 | REV3    | ATREV3 recovery protein 3                                            | Showed high sensitivity to UV-B, gamma-rays, and DNA cross-linkers. Both REV1 and REV3 transcripts were suppressed revlrev3 double mutant.                                                                                                                                                                                                                                                                                                                                                                                                                                                                                                                                                                                                                                                                                                                                                                                                                                                                                                                                                                                                                                                                                                                                                                                                                                                                                                                                                                                                                                                             | 15908599 | 1 | 1 |
| AT1G16590 | REV7    | ATREV7                                                               | Mutant plants were moderately sensitive to UV-B irradiation than the wild type when mutant seedlings were irradiated with various doses of UV-B irradiation and grown in the light. Aerial tissue growth was inhibited by long-term UV-B irradiation.                                                                                                                                                                                                                                                                                                                                                                                                                                                                                                                                                                                                                                                                                                                                                                                                                                                                                                                                                                                                                                                                                                                                                                                                                                                                                                                                                  | 15908599 | 1 | 1 |
| AT1G27320 | AHK3    | ORE12                                                                | Reduced down-regulation of phosphate starvation induced gene expression when plants are treated with cytokinins. Reduced response to exogenous cytokinins.                                                                                                                                                                                                                                                                                                                                                                                                                                                                                                                                                                                                                                                                                                                                                                                                                                                                                                                                                                                                                                                                                                                                                                                                                                                                                                                                                                                                                                             | 15923327 | 2 | 2 |
| AT1G71230 | CSN5B   | AJH2 COP9-siGnalsome 5B CSN5                                         | Synergistic phenotype: de-etiolated, fusca seedlings. Dark grown plants undergo photomorphogenesis: hypocotyl elongation, cotyledon expansion, anthocyanin accumulation in cotyledons.                                                                                                                                                                                                                                                                                                                                                                                                                                                                                                                                                                                                                                                                                                                                                                                                                                                                                                                                                                                                                                                                                                                                                                                                                                                                                                                                                                                                                 | 15923347 | 3 | 3 |
| AT1G22920 | CSN5A   | AJH1 CSN5B                                                           | Synergistic phenotype: de-etiolated, fusca seedlings. Dark grown plants undergo photomorphogenesis: hypocotyl elongation, cotyledon expansion, anthocyanin accumulation in cotyledons.                                                                                                                                                                                                                                                                                                                                                                                                                                                                                                                                                                                                                                                                                                                                                                                                                                                                                                                                                                                                                                                                                                                                                                                                                                                                                                                                                                                                                 | 15923347 | 3 | 3 |
| AT1G80330 | GA30X4  |                                                                      | No remarkable phenotype in its germination and vegetative growth. Delayed starch degradation in the outer seed integument but no difference in the embryo. Starches of columnar shape disappear sooner than smaller granules in the inner layer of the outer integument. Shape of hexagonal epidermal cells is severely distorted. Thinner and more heterogeneous distribution of mucilage at periphery of seeds. These phenotypes could be complemented by exogenous application of gibberellin GA4.                                                                                                                                                                                                                                                                                                                                                                                                                                                                                                                                                                                                                                                                                                                                                                                                                                                                                                                                                                                                                                                                                                  | 15927942 | 1 | 1 |
| AT1G65660 |         |                                                                      | Segregating populations will show occasional reversion (ca. 40% in some lines)-otherwise segregates 3:1 wt:mutant. Reduced leaf venation, serrated leaves, reduced stature, narrow organs, reduced fertility. Reduced cell numbers, but cells have increased size.                                                                                                                                                                                                                                                                                                                                                                                                                                                                                                                                                                                                                                                                                                                                                                                                                                                                                                                                                                                                                                                                                                                                                                                                                                                                                                                                     | 15937226 | 3 | 2 |
| AT2G06510 | RPA1A   | ATRPA1A ATRPA70A replication protein A 1A RPA70-KDA SUBUNIT A RPA70A | According to one report, this T-DNA insertion causes lethality and the authors could not recover homozygous mutants from a heterozygous parent.                                                                                                                                                                                                                                                                                                                                                                                                                                                                                                                                                                                                                                                                                                                                                                                                                                                                                                                                                                                                                                                                                                                                                                                                                                                                                                                                                                                                                                                        | 15978034 | 1 | 1 |
| AT1G80380 |         |                                                                      | In ambient air, the growth of the homozygote plant is arrested at early cotyledon stage. The seedlings die within 2 weeks. With elevated CO2, the plant grows slowly but is viable and fertile.                                                                                                                                                                                                                                                                                                                                                                                                                                                                                                                                                                                                                                                                                                                                                                                                                                                                                                                                                                                                                                                                                                                                                                                                                                                                                                                                                                                                        | 15980259 | 1 | 1 |
| AT1G09540 | MYB61   |                                                                      | Defective in regulation of stomatal pore size. Increased stomatal pore opening in light and dark.                                                                                                                                                                                                                                                                                                                                                                                                                                                                                                                                                                                                                                                                                                                                                                                                                                                                                                                                                                                                                                                                                                                                                                                                                                                                                                                                                                                                                                                                                                      | 16005292 |   |   |
| AT1G28300 | LEC2    |                                                                      | somatic embryogenesis ability is very limited in lec2 mutants                                                                                                                                                                                                                                                                                                                                                                                                                                                                                                                                                                                                                                                                                                                                                                                                                                                                                                                                                                                                                                                                                                                                                                                                                                                                                                                                                                                                                                                                                                                                          | 16034595 | 1 | 1 |
| AT1G28300 | LEC2    |                                                                      | strongly impaired ability to induce somatic embryos in vitro                                                                                                                                                                                                                                                                                                                                                                                                                                                                                                                                                                                                                                                                                                                                                                                                                                                                                                                                                                                                                                                                                                                                                                                                                                                                                                                                                                                                                                                                                                                                           | 16034595 | 1 | 1 |
| AT1G21970 | NFYB9   | LEC1                                                                 | somatic embryogenesis ability is very limited in lec1 mutants.                                                                                                                                                                                                                                                                                                                                                                                                                                                                                                                                                                                                                                                                                                                                                                                                                                                                                                                                                                                                                                                                                                                                                                                                                                                                                                                                                                                                                                                                                                                                         | 16034595 | 1 | 1 |
| AT1G21970 | NFYB9   | LEC1                                                                 | strongly impaired ability to induce somatic embryos in vitro                                                                                                                                                                                                                                                                                                                                                                                                                                                                                                                                                                                                                                                                                                                                                                                                                                                                                                                                                                                                                                                                                                                                                                                                                                                                                                                                                                                                                                                                                                                                           | 16034595 | 1 | 1 |
| AT1G04950 | TAF6    | EMB2781 TAF1159                                                      | Embryonic lethal in homozygotes.                                                                                                                                                                                                                                                                                                                                                                                                                                                                                                                                                                                                                                                                                                                                                                                                                                                                                                                                                                                                                                                                                                                                                                                                                                                                                                                                                                                                                                                                                                                                                                       | 16039640 |   |   |
| AT1G04950 | TAF6    | EMB2781 TAF1159                                                      | Pollen tube development from mutant homozygote pollen is affected, growth rate is reduced.                                                                                                                                                                                                                                                                                                                                                                                                                                                                                                                                                                                                                                                                                                                                                                                                                                                                                                                                                                                                                                                                                                                                                                                                                                                                                                                                                                                                                                                                                                             | 16039640 |   |   |
| AT1G11680 | CYP51G1 | CYP51A2 EMB1738                                                      | Pleiotropic effects on plant development. Slow growth, defective hypocotyl elongation, abnormal flowers, reduced levels of sterols, membranes leaky.                                                                                                                                                                                                                                                                                                                                                                                                                                                                                                                                                                                                                                                                                                                                                                                                                                                                                                                                                                                                                                                                                                                                                                                                                                                                                                                                                                                                                                                   | 16040657 | 1 | 1 |
| AT1G11680 | CYP51G1 | CYP51A2 EMB1738                                                      | Seedling lethal, pale yellow plants die at a variety of seedling stages.                                                                                                                                                                                                                                                                                                                                                                                                                                                                                                                                                                                                                                                                                                                                                                                                                                                                                                                                                                                                                                                                                                                                                                                                                                                                                                                                                                                                                                                                                                                               | 16040657 | 1 | 1 |
| AT1G69670 | CUL3B   |                                                                      | Arrest of embryogenesis occurred predominantly at heart stage. The following abnormalities were observed: premature or abnormal division of hypophyseal cell, underdeveloped short suspensor, abnormalities in procambial cell divisions, abnormalities in protoderm formation, underdeveloped endosperm with delayed cellularization.                                                                                                                                                                                                                                                                                                                                                                                                                                                                                                                                                                                                                                                                                                                                                                                                                                                                                                                                                                                                                                                                                                                                                                                                                                                                 | 16045478 | 1 | 1 |
| AT1G26830 | CUL3A   | CUL3                                                                 | Arrest of embryogenesis occurred predominantly at heart stage. The following abnormalities were observed: premature or abnormal division of hypophyseal cell, underdeveloped short suspensor, abnormalities in procambial cell divisions, abnormalities in protoderm formation, underdeveloped endosperm with delayed cellularization.                                                                                                                                                                                                                                                                                                                                                                                                                                                                                                                                                                                                                                                                                                                                                                                                                                                                                                                                                                                                                                                                                                                                                                                                                                                                 | 16045478 | 1 | 1 |
| AT1G21700 | SW13C   | CHB4                                                                 | Delayed development, semi-dwarf growth habit, and formation of aberrant rosettes. The rosette and cauline leaves are severely twisted along the proximodistal axis, leading to a downward curvature of the lateral edges toward the abaxial leaf surface. Cross sections of leaves showed an increased protrusion of mesophyll cell files around the vascular bundles. The root system is greatly reduced, because elongation of primary roots is inhibited. Seedlings develop several side roots and secondary root branches.                                                                                                                                                                                                                                                                                                                                                                                                                                                                                                                                                                                                                                                                                                                                                                                                                                                                                                                                                                                                                                                                         | 16055636 | 4 | 3 |
| AT1G48410 | AG01    |                                                                      | Homozygous progeny has unexpanded pointed cotyledons and very narrow rosette leaves.                                                                                                                                                                                                                                                                                                                                                                                                                                                                                                                                                                                                                                                                                                                                                                                                                                                                                                                                                                                                                                                                                                                                                                                                                                                                                                                                                                                                                                                                                                                   | 16081530 | 1 | 1 |

|           |         |                                                                                                                                                             |                                                                                                                                                                                                                                                                                                                                                                                                                                                                                                                                                                                                                                                                                                                                                                                                                                                                          |          |   |   |
|-----------|---------|-------------------------------------------------------------------------------------------------------------------------------------------------------------|--------------------------------------------------------------------------------------------------------------------------------------------------------------------------------------------------------------------------------------------------------------------------------------------------------------------------------------------------------------------------------------------------------------------------------------------------------------------------------------------------------------------------------------------------------------------------------------------------------------------------------------------------------------------------------------------------------------------------------------------------------------------------------------------------------------------------------------------------------------------------|----------|---|---|
| ATIG28560 | SRD2    |                                                                                                                                                             | temperature-sensitive mutant. <i>srđ2</i> seedlings grown at the permissive temperature (22C) appeared almost normal. At 28C, both hypocotyl and root explants of the <i>srđ2</i> mutant could not establish shoot apical meristems de novo. When primary root segments of <i>srđ2</i> were cultured on root-inducing medium (RIM) at 28C, abnormal lateral root primordia lacking functional apical meristems were frequently observed, except that they had fewer lateral roots than the wild-type seedlings. At the restrictive temperature (28C however), the development of true leaves and primary roots in <i>srđ2</i> seedlings was severely interrupted. Whereas root explants of the <i>srđ2</i> mutant formed calli on callus-inducing medium (CIM), at either 22C or 28C, callus formation from <i>srđ2</i> hypocotyl explants was strongly inhibited at 28C | 16098103 | 4 | 4 |
| ATIG30330 | ARF6    |                                                                                                                                                             | Short stamens, reduced fertility.                                                                                                                                                                                                                                                                                                                                                                                                                                                                                                                                                                                                                                                                                                                                                                                                                                        | 16107481 | 1 | 1 |
| ATIG30330 | ARF6    |                                                                                                                                                             | Twisted leaves, reduced fertility, short stamens, dwarf stature, closed flower buds (no anthesis), anthers do not dehisce, short stems.                                                                                                                                                                                                                                                                                                                                                                                                                                                                                                                                                                                                                                                                                                                                  | 16107481 | 1 | 1 |
| ATIG07630 | PLL5    |                                                                                                                                                             | Abnormal leaf shape- semidominant.                                                                                                                                                                                                                                                                                                                                                                                                                                                                                                                                                                                                                                                                                                                                                                                                                                       | 16112663 |   |   |
| ATIG42550 | PM11    |                                                                                                                                                             | mutant plants exhibit severely attenuated chloroplast movements under all tested fluence rates of light. Leaf cross sections revealed that regardless of the light condition, chloroplasts are more evenly distributed in leaf mesophyll cells in mutants than in the wild type.                                                                                                                                                                                                                                                                                                                                                                                                                                                                                                                                                                                         | 16113226 | 1 | 1 |
| ATIG42550 | PM11    |                                                                                                                                                             | severely attenuated chloroplast movement, similar phenotype to <i>pm11-2</i> .                                                                                                                                                                                                                                                                                                                                                                                                                                                                                                                                                                                                                                                                                                                                                                                           | 16113226 | 1 | 1 |
| ATIG28300 | LEC2    |                                                                                                                                                             | Similar to <i>tan-1 lec1-2</i> , embryo arrested mostly at transition or heart stage.                                                                                                                                                                                                                                                                                                                                                                                                                                                                                                                                                                                                                                                                                                                                                                                    | 16113228 | 1 | 0 |
| ATIG21970 | NFYB9   | LEC1                                                                                                                                                        | Most mutant embryos were arrested at transition or heart stage, with few reaching torpedo stage. Mutant seeds were desiccation intolerant and germinated poorly even when cultured on agar plates.                                                                                                                                                                                                                                                                                                                                                                                                                                                                                                                                                                                                                                                                       | 16113228 | 1 | 1 |
| ATIG50250 | FTSH1   | AAA FTSH                                                                                                                                                    | More variegated than <i>ftsh2</i> .                                                                                                                                                                                                                                                                                                                                                                                                                                                                                                                                                                                                                                                                                                                                                                                                                                      | 16126834 | 1 | 1 |
| ATIG50250 | FTSH1   | AAA FTSH                                                                                                                                                    | Completely white seedlings. Restoration of Heterozygosity of FTSH5 allows chloroplast development in the cotyledons.                                                                                                                                                                                                                                                                                                                                                                                                                                                                                                                                                                                                                                                                                                                                                     | 16126834 | 1 | 1 |
| ATIG06430 | FTSH8   |                                                                                                                                                             | Completely white seedlings. Restoration of Heterozygosity of FTSH8 allows chloroplast development in the cotyledons.                                                                                                                                                                                                                                                                                                                                                                                                                                                                                                                                                                                                                                                                                                                                                     | 16126834 | 1 | 1 |
| ATIG10930 | RECQL4A | RECQ4A RQL4A SGS1                                                                                                                                           | no phenotype under standard growth conditions. Hypersensitive to UV light. Hypersensitive to methyl methanesulfonate (MMC), a DNA alkylating agent. Enhanced resistance to increasing concentrations of MMC as compared to wild type.                                                                                                                                                                                                                                                                                                                                                                                                                                                                                                                                                                                                                                    | 16146519 | 2 | 2 |
| ATIG05850 | CTL1    | ARM ELP1 ERH2 HOT2 POM1                                                                                                                                     | exhibited a decrease in total extractives, and a concomitant increase in total lignins relative to wild-type plants, more H units relative to wild-type lignins in <i>pom1</i> , arabinose was more abundant in the insoluble residue from <i>pom1</i> .                                                                                                                                                                                                                                                                                                                                                                                                                                                                                                                                                                                                                 | 16159327 | 1 | 0 |
| ATIG05850 | CTL1    | ARM ELP1 ERH2 HOT2 POM1                                                                                                                                     | <i>det3/pom1</i> double mutants were severely compromised with respect to plant growth and development. Many of the <i>det3/pom1</i> double mutants died before bolting                                                                                                                                                                                                                                                                                                                                                                                                                                                                                                                                                                                                                                                                                                  | 16159327 | 1 | 1 |
| ATIG05850 | CTL1    | ARM ELP1 ERH2 HOT2 POM1                                                                                                                                     | The <i>pom1/el11</i> double mutant was compromised in growth and the rate of development was slow relative to the single mutants. The <i>pom1/el11</i> double mutants had very small rosettes, and their leaves accumulated anthocyanins.                                                                                                                                                                                                                                                                                                                                                                                                                                                                                                                                                                                                                                | 16159327 | 1 | 1 |
| ATIG11680 | CYP51G1 | CYP51A2 EMB1738                                                                                                                                             | embryo lethal.                                                                                                                                                                                                                                                                                                                                                                                                                                                                                                                                                                                                                                                                                                                                                                                                                                                           | 16169959 | 1 | 1 |
| ATIG19800 |         |                                                                                                                                                             | reduced growth, 50% of the seeds are aborted at the embryo heart stage, the seed chloroplasts have reduced galactolipids, and that the galactolipids have reduced 18-carbon fatty acids, leaves accumulate trigalactosyl diacylglycerol, triacylglycerol and phosphatidate                                                                                                                                                                                                                                                                                                                                                                                                                                                                                                                                                                                               | 16199613 | 3 | 2 |
| ATIG15690 | AVP1    | ARABIDOPSIS THALIANA V-PPASE 3 ATAVP1 ATAVP3 ATVHP1:1 AVP-3 FUGU 5 FUGUS VHP1                                                                               | Shoot defects include: smaller leaves, decreased cell number in leaves, mesophyll and vascular patterning disorganized, cup-shaped cotyledons. Root defects: small cells at apex, columella cell layers reduced to 2, deformed root cap.                                                                                                                                                                                                                                                                                                                                                                                                                                                                                                                                                                                                                                 | 16210544 | 2 | 2 |
| ATIG70210 | CYCD1-1 | CYCD1                                                                                                                                                       | During germination, the onset of cell proliferation in root tips is significantly delayed and the overall numbers of dividing cells are reduced. The delay in cell cycle activation is linked to delayed radicle emergence.                                                                                                                                                                                                                                                                                                                                                                                                                                                                                                                                                                                                                                              | 16227434 | 2 | 2 |
| ATIG22275 | ZYP1b   | ZYP1                                                                                                                                                        | Semi-sterile, reduced fertility. Progress through prophase I, meiosis is delayed.                                                                                                                                                                                                                                                                                                                                                                                                                                                                                                                                                                                                                                                                                                                                                                                        | 16230536 | 1 | 0 |
| ATIG22260 | ZYP1a   | ATZYP1a ZYP1                                                                                                                                                | Semi-sterile, reduced fertility. Progress through prophase I, meiosis is delayed.                                                                                                                                                                                                                                                                                                                                                                                                                                                                                                                                                                                                                                                                                                                                                                                        | 16230536 | 1 | 0 |
| ATIG63980 |         |                                                                                                                                                             | Albino plants where total chlorophylls and carotenoids are less than 1% and 2%, respectively, of wildtype contents.                                                                                                                                                                                                                                                                                                                                                                                                                                                                                                                                                                                                                                                                                                                                                      | 16231155 | 1 | 1 |
| ATIG63980 |         |                                                                                                                                                             | Chloroplasts of mesophyll cells completely lack thylakoids and are filled with large vesicles.                                                                                                                                                                                                                                                                                                                                                                                                                                                                                                                                                                                                                                                                                                                                                                           | 16231155 | 1 | 1 |
| ATIG63980 |         |                                                                                                                                                             | Round-shaped chloroplasts in mesophyll cells of mutant (lens-shaped in wildtype).                                                                                                                                                                                                                                                                                                                                                                                                                                                                                                                                                                                                                                                                                                                                                                                        | 16231155 | 1 | 1 |
| ATIG63970 | ISPF    | MCS MDS                                                                                                                                                     | Albino plants where total chlorophylls and carotenoids are less than 1% and 2%, respectively, of wildtype contents.                                                                                                                                                                                                                                                                                                                                                                                                                                                                                                                                                                                                                                                                                                                                                      | 16231155 | 1 | 1 |
| ATIG63970 | ISPF    | MCS MDS                                                                                                                                                     | Chloroplasts of mesophyll cells completely lack thylakoids and are filled with large vesicles.                                                                                                                                                                                                                                                                                                                                                                                                                                                                                                                                                                                                                                                                                                                                                                           | 16231155 | 1 | 1 |
| ATIG63970 | ISPF    | MCS MDS                                                                                                                                                     | Round-shaped chloroplasts in mesophyll cells of mutant (lens-shaped in wildtype).                                                                                                                                                                                                                                                                                                                                                                                                                                                                                                                                                                                                                                                                                                                                                                                        | 16231155 | 1 | 1 |
| ATIG08550 |         |                                                                                                                                                             | Lacks both zeaxanthin and tocopherols.                                                                                                                                                                                                                                                                                                                                                                                                                                                                                                                                                                                                                                                                                                                                                                                                                                   | 16258032 | 1 | 1 |
| ATIG08550 |         |                                                                                                                                                             | Molecules produced during oxidative stress (MDA) accumulate in <i>vtel npq1</i> leaves after 7 d in high light, confirming the occurrence of lipid peroxidation. Also, fatty acids and chlorophylls levels decrease in <i>npq1 vtel</i> leaves.                                                                                                                                                                                                                                                                                                                                                                                                                                                                                                                                                                                                                          | 16258032 | 1 | 1 |
| ATIG08550 |         |                                                                                                                                                             | PSII is strongly photoinhibited and lipid peroxidation is enhanced in the double mutant.                                                                                                                                                                                                                                                                                                                                                                                                                                                                                                                                                                                                                                                                                                                                                                                 | 16258032 | 1 | 1 |
| ATIG08550 |         |                                                                                                                                                             | Very sensitive to high light stress. When exposed to high light at low temperature, most of the mature leaves of <i>npq1 vtel</i> bleached in contrast with wild-type, <i>npq1</i> , or <i>vtel</i> leaves, which did not exhibit visual symptoms of oxidative stress.                                                                                                                                                                                                                                                                                                                                                                                                                                                                                                                                                                                                   | 16258032 | 1 | 1 |
| ATIG77300 | EPS     | ASH1 HOMOLOG 2 ASH2 CCR1 EARLY FLOWERING IN SHORT DAYS LAZ2 LAZARUS 2 SDG8 SET DOMAIN GROUP 8                                                               | Leaves are rounder and paler than wild-type.                                                                                                                                                                                                                                                                                                                                                                                                                                                                                                                                                                                                                                                                                                                                                                                                                             | 16258034 | 1 | 1 |
| ATIG77300 | EPS     | ASH1 HOMOLOG 2 ASH2 CCR1 EARLY FLOWERING IN SHORT DAYS LAZ2 LAZARUS 2 SDG8 SET DOMAIN GROUP 8                                                               | Reduced fertility.                                                                                                                                                                                                                                                                                                                                                                                                                                                                                                                                                                                                                                                                                                                                                                                                                                                       | 16258034 | 1 | 1 |
| ATIG77300 | EPS     | ASH1 HOMOLOG 2 ASH2 CCR1 EARLY FLOWERING IN SHORT DAYS LAZ2 LAZARUS 2 SDG8 SET DOMAIN GROUP 8                                                               | Reduced plant size (rosette diameter of plant is ~80% of that of wild-type).                                                                                                                                                                                                                                                                                                                                                                                                                                                                                                                                                                                                                                                                                                                                                                                             | 16258034 | 1 | 1 |
| ATIG77300 | EPS     | ASH1 HOMOLOG 2 ASH2 CCR1 EARLY FLOWERING IN SHORT DAYS LAZ2 LAZARUS 2 SDG8 SET DOMAIN GROUP 8                                                               | Suppression of the late-flowering phenotype of introgressed FRI allele.                                                                                                                                                                                                                                                                                                                                                                                                                                                                                                                                                                                                                                                                                                                                                                                                  | 16258034 | 1 | 1 |
| ATIG08260 | TIL1    | ABA OVERLY SENSITIVE 4 AB04 EARLY IN SHORT DAYS 7 EMB142 EMB2284 EMB529 EMBRYO DEFECTIVE 142 EMBRYO DEFECTIVE 2284 EMBRYO DEFECTIVE 529 ESD7 POL2A TILTED 1 | Twenty-five percent of embryos show abnormal cell divisions during embryogenesis-large cells- decreased rate of cell division. Division of the hypophyseal cell abnormal leading to abnormal placement of the root pole. Homozygotes show delayed flowering, abnormal floral phyllotaxy and abnormal ovules.                                                                                                                                                                                                                                                                                                                                                                                                                                                                                                                                                             | 16278345 | 3 | 3 |
| ATIG79040 |         |                                                                                                                                                             | Marked reduction in steady-state of oxygen evolution. 30% reduction in mutant plants grown under standard light conditions and over 50% reduction when grown under low light.                                                                                                                                                                                                                                                                                                                                                                                                                                                                                                                                                                                                                                                                                            | 16282331 | 1 | 1 |
| ATIG79040 |         |                                                                                                                                                             | Mutant plants are not more susceptible to donor-site photoinhibition.                                                                                                                                                                                                                                                                                                                                                                                                                                                                                                                                                                                                                                                                                                                                                                                                    | 16282331 | 1 | 0 |
| ATIG79040 |         |                                                                                                                                                             | Mutant plants exhibit over two-fold higher PSII excitation pressure compared to wildtype plants.                                                                                                                                                                                                                                                                                                                                                                                                                                                                                                                                                                                                                                                                                                                                                                         | 16282331 | 1 | 0 |
| ATIG79040 |         |                                                                                                                                                             | No observable phenotype under normal (125 & #956;mol photons/m <sup>2</sup> /s), high (450 & #956;mol photons/m <sup>2</sup> /s) or low (15 or 50 & #956;mol photons/m <sup>2</sup> /s) light.                                                                                                                                                                                                                                                                                                                                                                                                                                                                                                                                                                                                                                                                           | 16282331 | 1 | 0 |
| ATIG79040 |         |                                                                                                                                                             | Similar amount of PSI and PSII centers while wildtype plants have less PSI centers.                                                                                                                                                                                                                                                                                                                                                                                                                                                                                                                                                                                                                                                                                                                                                                                      | 16282331 | 1 | 0 |
| ATIG71830 | SERK1   |                                                                                                                                                             | double mutants were not able to produce seeds because of a lack of pollen development in mutant anthers. In young buds, double mutant anthers developed normally, but serk1 serk2 microsporangia produced more sporogenous cells that were unable to develop beyond meiosis. Furthermore, serk1 serk2 double mutants developed only three cell layers surrounding the sporogenous cell mass, whereas wild-type anthers developed four cell layers. Further confocal microscopic and molecular analyses showed that serk1 serk2 double mutant anthers lack development of the tapetal cell layer, which accounts for the microspore abortion and male sterility.                                                                                                                                                                                                          | 16284306 | 2 | 2 |
| ATIG34210 | SERK2   |                                                                                                                                                             | double mutants were not able to produce seeds because of a lack of pollen development in mutant anthers. In young buds, double mutant anthers developed normally, but serk1 serk2 microsporangia produced more sporogenous cells that were unable to develop beyond meiosis. Furthermore, serk1 serk2 double mutants developed only three cell layers surrounding the sporogenous cell mass, whereas wild-type anthers developed four cell layers. Further confocal microscopic and molecular analyses showed that serk1 serk2 double mutant anthers lack development of the tapetal cell layer, which accounts for the microspore abortion and male sterility.                                                                                                                                                                                                          | 16284306 | 2 | 2 |
| ATIG16150 | WAKL4   |                                                                                                                                                             | Seedlings consistently show retarded root growth when grown in full- or one-half-strength MS nutrients and are hypersensitive, as assayed by a root elongation assay, to Na <sup>+</sup> , K <sup>+</sup> , Zn <sup>2+</sup> and Cu <sup>2+</sup> .                                                                                                                                                                                                                                                                                                                                                                                                                                                                                                                                                                                                                      | 16286448 | 1 | 1 |
| ATIG55600 | WRKY10  | MIN13                                                                                                                                                       | Similar to <i>iku2-3</i> mutant, seed and embryo smaller in size, however the embryo cell size was comparable to control embryos. Precocious cellularization of the endosperm was observed. Expression levels of <i>IKU2</i> reduced in <i>mini3-1</i> background.                                                                                                                                                                                                                                                                                                                                                                                                                                                                                                                                                                                                       | 16293693 | 1 | 1 |

|           |          |                                                                                                   |                                                                                                                                                                                                                                                                                                                                                                                                                                                                                                                                                                                                                                                                                                                                                                                                                                                                                                                                                                                                       |          |   |   |
|-----------|----------|---------------------------------------------------------------------------------------------------|-------------------------------------------------------------------------------------------------------------------------------------------------------------------------------------------------------------------------------------------------------------------------------------------------------------------------------------------------------------------------------------------------------------------------------------------------------------------------------------------------------------------------------------------------------------------------------------------------------------------------------------------------------------------------------------------------------------------------------------------------------------------------------------------------------------------------------------------------------------------------------------------------------------------------------------------------------------------------------------------------------|----------|---|---|
| AT1G55600 | WRKY10   | MIN3                                                                                              | Similar to the phenotype of parental lines, mini3-1 and iku2-3. Seed size and weight comparable to single mutants lines.                                                                                                                                                                                                                                                                                                                                                                                                                                                                                                                                                                                                                                                                                                                                                                                                                                                                              | 16293693 | 1 | 1 |
| AT1G69830 | AMY3     |                                                                                                   | Plants cold-shocked for 6h have an increased starch content compared to wildtype.                                                                                                                                                                                                                                                                                                                                                                                                                                                                                                                                                                                                                                                                                                                                                                                                                                                                                                                     | 16297066 | 1 | 1 |
| AT1G25350 | OVA9     | ovule abortion 9                                                                                  | In heterozygous plants, 39% of ovules are aborted compared to 6% for wild type siblings.                                                                                                                                                                                                                                                                                                                                                                                                                                                                                                                                                                                                                                                                                                                                                                                                                                                                                                              | 16297076 | 1 | 1 |
| AT1G05630 | 5PTASE13 | AT5PTASE13                                                                                        | Compared to wild-type plants, cotyledon veins of At5pt13-1 were with altered numbers (4%), in incorrect vein orientation (16.3%), with additional or altered loops (1.7%), with branches (1.3%), with intersections (1.3%) and fusions (5.3%) of the distal and proximal secondary veins, or with acute angles (3.3%). In addition, the cotyledon veins of At5pt13-1 were asymmetric, with flexed secondary veins and often multiple abnormalities, such as asymmetry, abnormal caecal orientation, or flex (10.7%). Statistical analyses revealed that around 64.7% of the total cotyledons showed obvious abnormality, while the ratio of seedlings with abnormal cotyledons reaches to approximately 90%.                                                                                                                                                                                                                                                                                          | 16299182 | 2 | 1 |
| AT1G59940 | ARR3     | response reGulaTor 3                                                                              | lengthens the period of the clock in all conditions                                                                                                                                                                                                                                                                                                                                                                                                                                                                                                                                                                                                                                                                                                                                                                                                                                                                                                                                                   | 16326927 | 1 | 1 |
| AT1G10470 | ARR4     | ATRR1 IBC7 INDUCED BY CYTOKININ 7 MEE7 RESPONSE REGULATOR 1 response reGulaTor 4                  | lengthens the period of the clock in all conditions                                                                                                                                                                                                                                                                                                                                                                                                                                                                                                                                                                                                                                                                                                                                                                                                                                                                                                                                                   | 16326927 | 1 | 1 |
| AT1G50240 | T10      | FU                                                                                                | Mutant plants had binucleate mature pollen grains, contrary to tricellular pollen in the wild type, due to failure to undergo cytokinesis at pollen mitosis. Binucleate mutant pollen contained two free nuclei and remained uncellularized. Mature mutant embryo sacs showed various numbers (2 to 5) of nuclei located toward the micropylar pole without visible cellular boundaries. After fertilization, mutant embryo sacs did not develop further and remained uncellularized. At early bicellular pollen stage, approximately 1/3 of dividing microspores had incomplete callose walls, which were correctly positioned at the generative cell pole but do not persist and are degraded before mid-bicellular pollen stage. Subsequently, at mid-bicellular pollen stage, when the generative cell nucleus is highly condensed in wild-type, in approximately 1/3 of mutant pollen, the smaller generative pole nucleus remains round and relatively uncondensed and does not divide further. | 16332535 |   |   |
| AT1G50240 | T10      | FU                                                                                                | Mutant plants had binucleate mature pollen grains, contrary to tricellular pollen in the wild type, due to failure to undergo cytokinesis at pollen mitosis. Binucleate mutant pollen contained two free nuclei and remained uncellularized. Mature mutant embryo sacs showed various numbers (2 to 5) of nuclei located toward the micropylar pole without visible cellular boundaries. After fertilization, mutant embryo sacs did not develop further and remained uncellularized. At early bicellular pollen stage, approximately 1/2 of dividing microspores had incomplete callose walls, which were correctly positioned at the generative cell pole but do not persist and are degraded before mid-bicellular pollen stage. Subsequently, at mid-bicellular pollen stage, when the generative cell nucleus is highly condensed in wild-type, in approximately 1/2 of mutant pollen, the smaller generative pole nucleus remains round and relatively uncondensed and does not divide further. | 16332535 |   |   |
| AT1G48380 | RHL1     | HYP7                                                                                              | Extreme dwarf in the dark and in the light. Reduced root hair number. Trichome size and branching is reduced. Ploidy defect.                                                                                                                                                                                                                                                                                                                                                                                                                                                                                                                                                                                                                                                                                                                                                                                                                                                                          | 16339310 | 4 | 2 |
| AT1G24590 | ESR2     | DRNL ERF090 SOB2                                                                                  | Dramatically shorter hypocotyl compared to phyB-4 single mutant. Adult plants have curled leaves lacking petioles and irregularly shaped siliques.                                                                                                                                                                                                                                                                                                                                                                                                                                                                                                                                                                                                                                                                                                                                                                                                                                                    | 16339853 | 2 | 0 |
| AT1G31480 | SGR2     |                                                                                                   | showed a defect in sedimentation of amyloplasts in the petiole                                                                                                                                                                                                                                                                                                                                                                                                                                                                                                                                                                                                                                                                                                                                                                                                                                                                                                                                        | 16344262 | 1 | 1 |
| AT2G01830 | WOL      | AHK4 ARABIDOPSIS HISTIDINE KINASE 4 ATCRE1 CRE1 CYTOKININ RESPONSE 1 WOL1 WOODEN LEG WOODEN LEG 1 | Aborted vascular system containing few protoxylem cells in the primary root. Normal adventitious root-vascular system.                                                                                                                                                                                                                                                                                                                                                                                                                                                                                                                                                                                                                                                                                                                                                                                                                                                                                | 16357038 | 2 | 0 |
| AT2G01830 | WOL      | AHK4 ARABIDOPSIS HISTIDINE KINASE 4 ATCRE1 CRE1 CYTOKININ RESPONSE 1 WOL1 WOODEN LEG WOODEN LEG 1 | Adventitious roots are normal.                                                                                                                                                                                                                                                                                                                                                                                                                                                                                                                                                                                                                                                                                                                                                                                                                                                                                                                                                                        | 16357038 | 1 | 1 |
| AT2G01830 | WOL      | AHK4 ARABIDOPSIS HISTIDINE KINASE 4 ATCRE1 CRE1 CYTOKININ RESPONSE 1 WOL1 WOODEN LEG WOODEN LEG 1 | Does not produce lateral roots from the primary root. However, 10 days after germination, lateral roots are formed at the upper part of the hypocotyl rather than at the root-hypocotyl junction.                                                                                                                                                                                                                                                                                                                                                                                                                                                                                                                                                                                                                                                                                                                                                                                                     | 16357038 | 2 | 0 |
| AT2G01830 | WOL      | AHK4 ARABIDOPSIS HISTIDINE KINASE 4 ATCRE1 CRE1 CYTOKININ RESPONSE 1 WOL1 WOODEN LEG WOODEN LEG 1 | Normal vascular system in adventitious roots, although the hypocotyl and primary root develop aborted vascular tissues.                                                                                                                                                                                                                                                                                                                                                                                                                                                                                                                                                                                                                                                                                                                                                                                                                                                                               | 16357038 | 2 | 2 |
| AT2G01830 | WOL      | AHK4 ARABIDOPSIS HISTIDINE KINASE 4 ATCRE1 CRE1 CYTOKININ RESPONSE 1 WOL1 WOODEN LEG WOODEN LEG 1 | Addition of IAA results in the formation of laterals from the primary root as is the case for wildtype. Both the laterals and primary root show retarded growth and reduced amounts of vascular tissue. Similar phenotypes were obtained with NAA instead of IAA.                                                                                                                                                                                                                                                                                                                                                                                                                                                                                                                                                                                                                                                                                                                                     | 16357038 | 2 | 2 |
| AT2G01830 | WOL      | AHK4 ARABIDOPSIS HISTIDINE KINASE 4 ATCRE1 CRE1 CYTOKININ RESPONSE 1 WOL1 WOODEN LEG WOODEN LEG 1 | Reduction in primary root length (about 5-fold compared to wildtype).                                                                                                                                                                                                                                                                                                                                                                                                                                                                                                                                                                                                                                                                                                                                                                                                                                                                                                                                 | 16357038 | 1 | 1 |
| AT2G01830 | WOL      | AHK4 ARABIDOPSIS HISTIDINE KINASE 4 ATCRE1 CRE1 CYTOKININ RESPONSE 1 WOL1 WOODEN LEG WOODEN LEG 1 | The hypocotyl vascular system only contains xylem cells. Secondary vascular tissue develops in the upper part of the hypocotyl.                                                                                                                                                                                                                                                                                                                                                                                                                                                                                                                                                                                                                                                                                                                                                                                                                                                                       | 16357038 | 2 | 0 |
| AT1G27320 | AHK3     | ORE12                                                                                             | Aborted vascular system containing few protoxylem cells in the primary root. Normal adventitious root-vascular system.                                                                                                                                                                                                                                                                                                                                                                                                                                                                                                                                                                                                                                                                                                                                                                                                                                                                                | 16357038 | 2 | 2 |
| AT1G27320 | AHK3     | ORE12                                                                                             | Adventitious roots are normal.                                                                                                                                                                                                                                                                                                                                                                                                                                                                                                                                                                                                                                                                                                                                                                                                                                                                                                                                                                        | 16357038 | 1 | 1 |
| AT1G27320 | AHK3     | ORE12                                                                                             | Does not produce lateral roots from the primary root. However, 10 days after germination, lateral roots are formed at the upper part of the hypocotyl rather than at the root-hypocotyl junction.                                                                                                                                                                                                                                                                                                                                                                                                                                                                                                                                                                                                                                                                                                                                                                                                     | 16357038 | 2 | 2 |
| AT1G27320 | AHK3     | ORE12                                                                                             | Normal vascular system in adventitious roots, although the hypocotyl and primary root develop aborted vascular tissues.                                                                                                                                                                                                                                                                                                                                                                                                                                                                                                                                                                                                                                                                                                                                                                                                                                                                               | 16357038 | 2 | 2 |
| AT1G55870 | AHG2     | ATPARN                                                                                            | Hypersensitive to exogenous and endogenous ABA during germination due to accumulation of high levels of ABA. The lengths of the main root, hypocotyl and stem of ahg2-1 were significantly shorter than those of the wild type. The growth rate of the main root was apparently reduced. The leaf size (length and width) in ahg2-1 was reduced to just over half, but the number of rosette leaves was not affected markedly. The reduced size of the ahg2-1 plant is due mainly to the reduced cell size, not to a reduced number of cells. Fertility was not affected. Sensitive to salicylic acid                                                                                                                                                                                                                                                                                                                                                                                                 | 16359390 | 5 | 5 |
| AT2G01830 | WOL      | AHK4 ARABIDOPSIS HISTIDINE KINASE 4 ATCRE1 CRE1 CYTOKININ RESPONSE 1 WOL1 WOODEN LEG WOODEN LEG 1 | Almost completely infertile but can be allowed to self-fertilize under favorable temperature and light conditions.                                                                                                                                                                                                                                                                                                                                                                                                                                                                                                                                                                                                                                                                                                                                                                                                                                                                                    | 16361392 | 2 | 0 |
| AT2G01830 | WOL      | AHK4 ARABIDOPSIS HISTIDINE KINASE 4 ATCRE1 CRE1 CYTOKININ RESPONSE 1 WOL1 WOODEN LEG WOODEN LEG 1 | Chlorophyll content about 35% of that of wild-type.                                                                                                                                                                                                                                                                                                                                                                                                                                                                                                                                                                                                                                                                                                                                                                                                                                                                                                                                                   | 16361392 | 1 | 0 |
| AT2G01830 | WOL      | AHK4 ARABIDOPSIS HISTIDINE KINASE 4 ATCRE1 CRE1 CYTOKININ RESPONSE 1 WOL1 WOODEN LEG WOODEN LEG 1 | Delay in flowering induction.                                                                                                                                                                                                                                                                                                                                                                                                                                                                                                                                                                                                                                                                                                                                                                                                                                                                                                                                                                         | 16361392 | 1 | 0 |
| AT2G01830 | WOL      | AHK4 ARABIDOPSIS HISTIDINE KINASE 4 ATCRE1 CRE1 CYTOKININ RESPONSE 1 WOL1 WOODEN LEG WOODEN LEG 1 | Delay in rate of leaf formation. Longer plastochrone.                                                                                                                                                                                                                                                                                                                                                                                                                                                                                                                                                                                                                                                                                                                                                                                                                                                                                                                                                 | 16361392 | 2 | 2 |
| AT2G01830 | WOL      | AHK4 ARABIDOPSIS HISTIDINE KINASE 4 ATCRE1 CRE1 CYTOKININ RESPONSE 1 WOL1 WOODEN LEG WOODEN LEG 1 | Downwards bending of cotyledons indicating differential growth in the adaxial and abaxial sides.                                                                                                                                                                                                                                                                                                                                                                                                                                                                                                                                                                                                                                                                                                                                                                                                                                                                                                      | 16361392 | 1 | 0 |
| AT2G01830 | WOL      | AHK4 ARABIDOPSIS HISTIDINE KINASE 4 ATCRE1 CRE1 CYTOKININ RESPONSE 1 WOL1 WOODEN LEG WOODEN LEG 1 | Early germination compared to wild-type.                                                                                                                                                                                                                                                                                                                                                                                                                                                                                                                                                                                                                                                                                                                                                                                                                                                                                                                                                              | 16361392 | 1 | 0 |
| AT2G01830 | WOL      | AHK4 ARABIDOPSIS HISTIDINE KINASE 4 ATCRE1 CRE1 CYTOKININ RESPONSE 1 WOL1 WOODEN LEG WOODEN LEG 1 | Increase in trans-zeatin (16-fold) and trans-zeatin ribosides (9-fold) concentrations. 50-fold concentration increase for zeatin-0-glucoside.                                                                                                                                                                                                                                                                                                                                                                                                                                                                                                                                                                                                                                                                                                                                                                                                                                                         | 16361392 | 3 | 0 |
| AT2G01830 | WOL      | AHK4 ARABIDOPSIS HISTIDINE KINASE 4 ATCRE1 CRE1 CYTOKININ RESPONSE 1 WOL1 WOODEN LEG WOODEN LEG 1 | Increased cytokinin resistance compared to double mutant ahk2-5 ahk3-7.                                                                                                                                                                                                                                                                                                                                                                                                                                                                                                                                                                                                                                                                                                                                                                                                                                                                                                                               | 16361392 | 1 | 0 |
| AT2G01830 | WOL      | AHK4 ARABIDOPSIS HISTIDINE KINASE 4 ATCRE1 CRE1 CYTOKININ RESPONSE 1 WOL1 WOODEN LEG WOODEN LEG 1 | Increased seed size, largely due to increased size of the embryo. Embryonic root epidermal cells increased 15% in number and 30% in size compared to wild-type.                                                                                                                                                                                                                                                                                                                                                                                                                                                                                                                                                                                                                                                                                                                                                                                                                                       | 16361392 | 2 | 0 |
| AT2G01830 | WOL      | AHK4 ARABIDOPSIS HISTIDINE KINASE 4 ATCRE1 CRE1 CYTOKININ RESPONSE 1 WOL1 WOODEN LEG WOODEN LEG 1 | Leaf epifermal cell size is increased about three-fold compared to wild-type cells, in young as well as older leaves.                                                                                                                                                                                                                                                                                                                                                                                                                                                                                                                                                                                                                                                                                                                                                                                                                                                                                 | 16361392 | 1 | 1 |
| AT2G01830 | WOL      | AHK4 ARABIDOPSIS HISTIDINE KINASE 4 ATCRE1 CRE1 CYTOKININ RESPONSE 1 WOL1 WOODEN LEG WOODEN LEG 1 | Shorter hypocotyls than wild-type when grown in white light but increase in length when grown in darkness (~25%) and red- and far-red-light.                                                                                                                                                                                                                                                                                                                                                                                                                                                                                                                                                                                                                                                                                                                                                                                                                                                          | 16361392 | 2 | 2 |
| AT2G01830 | WOL      | AHK4 ARABIDOPSIS HISTIDINE KINASE 4 ATCRE1 CRE1 CYTOKININ RESPONSE 1 WOL1 WOODEN LEG WOODEN LEG 1 | Stronger reduction of shoot development compared to double mutant ahk2-5 ahk3-7.                                                                                                                                                                                                                                                                                                                                                                                                                                                                                                                                                                                                                                                                                                                                                                                                                                                                                                                      | 16361392 | 1 | 0 |

|           |       |                                                                                                         |                                                                                                                                                                                                                                                                                                                                                                                                                                                                                                                                                                                                                      |          |   |   |
|-----------|-------|---------------------------------------------------------------------------------------------------------|----------------------------------------------------------------------------------------------------------------------------------------------------------------------------------------------------------------------------------------------------------------------------------------------------------------------------------------------------------------------------------------------------------------------------------------------------------------------------------------------------------------------------------------------------------------------------------------------------------------------|----------|---|---|
| AT2G01830 | WOL   | AHK4 ARABIDOPSIS HISTIDINE KINASE 4<br>ATCRE1 CRE1 CYTOKININ RESPONSE 1<br>WOL1 WOODEN LEG WOODEN LEG 1 | Total loss of cytokinin-dependent chlorophyll retention in leaves (under dark conditions causing the so-called 'dark-induced senescence').                                                                                                                                                                                                                                                                                                                                                                                                                                                                           | 16361392 | 1 | 0 |
| AT2G01830 | WOL   | AHK4 ARABIDOPSIS HISTIDINE KINASE 4<br>ATCRE1 CRE1 CYTOKININ RESPONSE 1<br>WOL1 WOODEN LEG WOODEN LEG 1 | Displays secondary lateral root branching (not seen in wild-type).                                                                                                                                                                                                                                                                                                                                                                                                                                                                                                                                                   | 16361392 | 1 | 1 |
| AT2G01830 | WOL   | AHK4 ARABIDOPSIS HISTIDINE KINASE 4<br>ATCRE1 CRE1 CYTOKININ RESPONSE 1<br>WOL1 WOODEN LEG WOODEN LEG 1 | With a few exceptions, no increase in zeatin concentrations.                                                                                                                                                                                                                                                                                                                                                                                                                                                                                                                                                         | 16361392 | 1 | 0 |
| AT2G01830 | WOL   | AHK4 ARABIDOPSIS HISTIDINE KINASE 4<br>ATCRE1 CRE1 CYTOKININ RESPONSE 1<br>WOL1 WOODEN LEG WOODEN LEG 1 | Resistant to cytokinin-induced hypocotyl shortening.                                                                                                                                                                                                                                                                                                                                                                                                                                                                                                                                                                 | 16361392 | 1 | 1 |
| AT2G01830 | WOL   | AHK4 ARABIDOPSIS HISTIDINE KINASE 4<br>ATCRE1 CRE1 CYTOKININ RESPONSE 1<br>WOL1 WOODEN LEG WOODEN LEG 1 | Two- to three-fold increase of concentrations of all zeatin metabolites.                                                                                                                                                                                                                                                                                                                                                                                                                                                                                                                                             | 16361392 | 1 | 0 |
| AT2G01830 | WOL   | AHK4 ARABIDOPSIS HISTIDINE KINASE 4<br>ATCRE1 CRE1 CYTOKININ RESPONSE 1<br>WOL1 WOODEN LEG WOODEN LEG 1 | No difference in chlorophyll content compared to wild-type.                                                                                                                                                                                                                                                                                                                                                                                                                                                                                                                                                          | 16361392 | 1 | 0 |
| AT2G01830 | WOL   | AHK4 ARABIDOPSIS HISTIDINE KINASE 4<br>ATCRE1 CRE1 CYTOKININ RESPONSE 1<br>WOL1 WOODEN LEG WOODEN LEG 1 | No loss of cytokinin-dependent chlorophyll retention in leaves (under dark conditions causing the so-called 'dark-induced senescence').                                                                                                                                                                                                                                                                                                                                                                                                                                                                              | 16361392 | 1 | 0 |
| AT2G01830 | WOL   | AHK4 ARABIDOPSIS HISTIDINE KINASE 4<br>ATCRE1 CRE1 CYTOKININ RESPONSE 1<br>WOL1 WOODEN LEG WOODEN LEG 1 | Shoot development indistinguishable from that of wild-type.                                                                                                                                                                                                                                                                                                                                                                                                                                                                                                                                                          | 16361392 | 1 | 0 |
| AT1G27320 | AHK3  | ORE12                                                                                                   | Chlorophyll content further reduced compared to single mutant ahk3-7.                                                                                                                                                                                                                                                                                                                                                                                                                                                                                                                                                | 16361392 | 1 | 0 |
| AT1G27320 | AHK3  | ORE12                                                                                                   | Displays secondary lateral root branching (not seen in wild-type).                                                                                                                                                                                                                                                                                                                                                                                                                                                                                                                                                   | 16361392 | 1 | 1 |
| AT1G27320 | AHK3  | ORE12                                                                                                   | Downwards bending of cotyledons indicating differential growth in the adaxial and abaxial sides.                                                                                                                                                                                                                                                                                                                                                                                                                                                                                                                     | 16361392 | 1 | 1 |
| AT1G27320 | AHK3  | ORE12                                                                                                   | Early germination compared to wild-type.                                                                                                                                                                                                                                                                                                                                                                                                                                                                                                                                                                             | 16361392 | 1 | 0 |
| AT1G27320 | AHK3  | ORE12                                                                                                   | Enhancement of phenotype observed for single mutant ahk3-7: Reduced ability to respond to cytokinin by callus or shoot formation.                                                                                                                                                                                                                                                                                                                                                                                                                                                                                    | 16361392 | 1 | 1 |
| AT1G27320 | AHK3  | ORE12                                                                                                   | Enhancement of phenotype observed in single mutant ahk3-7: Mutant seedlings grow better and form darker green leaves in the presence of elevated levels of cytokinins in medium. Increased cytokinin resistance                                                                                                                                                                                                                                                                                                                                                                                                      | 16361392 | 2 | 2 |
| AT1G27320 | AHK3  | ORE12                                                                                                   | Epidermal cells of fifth leaf at maturity are about double in size compared to wild-type cells. Leaves formed at later stages are similar to wild-type.                                                                                                                                                                                                                                                                                                                                                                                                                                                              | 16361392 | 2 | 1 |
| AT1G27320 | AHK3  | ORE12                                                                                                   | Further reduction of rosette diameter size compared to single mutant ahk3-7.                                                                                                                                                                                                                                                                                                                                                                                                                                                                                                                                         | 16361392 | 1 | 1 |
| AT1G27320 | AHK3  | ORE12                                                                                                   | No alteration of flowering induction timing.                                                                                                                                                                                                                                                                                                                                                                                                                                                                                                                                                                         | 16361392 | 1 | 1 |
| AT1G27320 | AHK3  | ORE12                                                                                                   | No alteration of rate of leaf formation.                                                                                                                                                                                                                                                                                                                                                                                                                                                                                                                                                                             | 16361392 | 1 | 1 |
| AT1G27320 | AHK3  | ORE12                                                                                                   | Reduced length and width of leaves but overall form and heteroblasty is not altered.                                                                                                                                                                                                                                                                                                                                                                                                                                                                                                                                 | 16361392 | 1 | 0 |
| AT1G27320 | AHK3  | ORE12                                                                                                   | Resistant to cytokinin-induced hypocotyl shortening.                                                                                                                                                                                                                                                                                                                                                                                                                                                                                                                                                                 | 16361392 | 1 | 1 |
| AT1G27320 | AHK3  | ORE12                                                                                                   | Three- to tenfold higher cytokinin concentrations required to induce callus formation and growth. Shoot formation very rarely observed in double mutant explants.                                                                                                                                                                                                                                                                                                                                                                                                                                                    | 16361392 | 2 | 0 |
| AT1G27320 | AHK3  | ORE12                                                                                                   | Total loss of cytokinin-dependent chlorophyll retention in leaves (under dark conditions causing the so-called 'dark-induced senescence').                                                                                                                                                                                                                                                                                                                                                                                                                                                                           | 16361392 | 1 | 1 |
| AT1G27320 | AHK3  | ORE12                                                                                                   | Two- to three-fold increase of concentrations of all zeatin metabolites.                                                                                                                                                                                                                                                                                                                                                                                                                                                                                                                                             | 16361392 | 1 | 0 |
| AT1G27320 | AHK3  | ORE12                                                                                                   | Almost completely infertile but can be allowed to self-fertilize under favorable temperature and light conditions.                                                                                                                                                                                                                                                                                                                                                                                                                                                                                                   | 16361392 | 2 | 1 |
| AT1G27320 | AHK3  | ORE12                                                                                                   | Chlorophyll content about 35% of that of wild-type.                                                                                                                                                                                                                                                                                                                                                                                                                                                                                                                                                                  | 16361392 | 1 | 0 |
| AT1G27320 | AHK3  | ORE12                                                                                                   | Delay in flowering induction.                                                                                                                                                                                                                                                                                                                                                                                                                                                                                                                                                                                        | 16361392 | 1 | 1 |
| AT1G27320 | AHK3  | ORE12                                                                                                   | Delay in rate of leaf formation. Longer plastochrone.                                                                                                                                                                                                                                                                                                                                                                                                                                                                                                                                                                | 16361392 | 2 | 1 |
| AT1G27320 | AHK3  | ORE12                                                                                                   | Increase in trans-zeatin (16-fold) and trans-zeatin ribosides (9-fold) concentrations. 50-fold concentration increase for zeatin-0-glucoside.                                                                                                                                                                                                                                                                                                                                                                                                                                                                        | 16361392 | 3 | 0 |
| AT1G27320 | AHK3  | ORE12                                                                                                   | Increased cytokinin resistance compared to double mutant ahk2-5 ahk3-7.                                                                                                                                                                                                                                                                                                                                                                                                                                                                                                                                              | 16361392 | 1 | 0 |
| AT1G27320 | AHK3  | ORE12                                                                                                   | Increased seed size, largely due to increased size of the embryo. Embryonic root epidermal cells increased 15% in number and 30% in size compared to wild-type.                                                                                                                                                                                                                                                                                                                                                                                                                                                      | 16361392 | 2 | 1 |
| AT1G27320 | AHK3  | ORE12                                                                                                   | Leaf epidermal cell size is increased about three-fold compared to wild-type cells, in young as well as older leaves.                                                                                                                                                                                                                                                                                                                                                                                                                                                                                                | 16361392 | 1 | 1 |
| AT1G27320 | AHK3  | ORE12                                                                                                   | Shorter hypocotyls than wild-type when grown in white light but increase in length when grown in darkness (~25%) and red- and far-red-light.                                                                                                                                                                                                                                                                                                                                                                                                                                                                         | 16361392 | 2 | 1 |
| AT1G27320 | AHK3  | ORE12                                                                                                   | Stronger reduction of shoot development compared to double mutant ahk2-5 ahk3-7.                                                                                                                                                                                                                                                                                                                                                                                                                                                                                                                                     | 16361392 | 1 | 0 |
| AT1G27320 | AHK3  | ORE12                                                                                                   | Chlorophyll content about 75% of that of wild-type.                                                                                                                                                                                                                                                                                                                                                                                                                                                                                                                                                                  | 16361392 | 1 | 0 |
| AT1G27320 | AHK3  | ORE12                                                                                                   | Final height of mutant plant about two-thirds of that of wild-type.                                                                                                                                                                                                                                                                                                                                                                                                                                                                                                                                                  | 16361392 | 1 | 0 |
| AT1G27320 | AHK3  | ORE12                                                                                                   | Mutant seedlings grow better and form darker green leaves in the presence of elevated levels of cytokinins in medium.                                                                                                                                                                                                                                                                                                                                                                                                                                                                                                | 16361392 | 2 | 1 |
| AT1G27320 | AHK3  | ORE12                                                                                                   | No loss of cytokinin-dependent chlorophyll retention in leaves (under dark conditions causing the so-called 'dark-induced senescence').                                                                                                                                                                                                                                                                                                                                                                                                                                                                              | 16361392 | 1 | 0 |
| AT1G27320 | AHK3  | ORE12                                                                                                   | Reduced ability to respond to cytokinin by callus or shoot formation.                                                                                                                                                                                                                                                                                                                                                                                                                                                                                                                                                | 16361392 | 1 | 1 |
| AT1G27320 | AHK3  | ORE12                                                                                                   | Rosette diameter reduced ~15% compared to wild-type.                                                                                                                                                                                                                                                                                                                                                                                                                                                                                                                                                                 | 16361392 | 1 | 1 |
| AT2G03720 | MRR6  | morphogenesis of root hair 6                                                                            | Multiple straight hairs                                                                                                                                                                                                                                                                                                                                                                                                                                                                                                                                                                                              | 16367956 | 1 | 0 |
| AT1G77760 | NIA1  |                                                                                                         | Guard cells do not generate NO in response to H2O2 and are not significantly different to untreated controls.                                                                                                                                                                                                                                                                                                                                                                                                                                                                                                        | 16367958 | 2 | 1 |
| AT1G77760 | NIA1  |                                                                                                         | Significantly impaired in NO biosynthesis in response to exogenous H2O2 compared to wild-type.                                                                                                                                                                                                                                                                                                                                                                                                                                                                                                                       | 16367958 | 1 | 1 |
| AT1G77760 | NIA1  |                                                                                                         | Stomatal aperture not affected by treatment with sodium nitroprusside (SNP).                                                                                                                                                                                                                                                                                                                                                                                                                                                                                                                                         | 16367958 | 1 | 1 |
| AT1G64060 | RBOHF | RBOHAP108                                                                                               | ABA fails to induce significant nitric acid (NO) production in the guard cells of this double mutant.                                                                                                                                                                                                                                                                                                                                                                                                                                                                                                                | 16367958 | 1 | 1 |
| AT1G37130 | NIA2  |                                                                                                         | Guard cells do not generate NO in response to H2O2 and are not significantly different to untreated controls.                                                                                                                                                                                                                                                                                                                                                                                                                                                                                                        | 16367958 | 2 | 1 |
| AT1G37130 | NIA2  |                                                                                                         | Significantly impaired in NO biosynthesis in response to exogenous H2O2 compared to wild-type.                                                                                                                                                                                                                                                                                                                                                                                                                                                                                                                       | 16367958 | 1 | 1 |
| AT1G37130 | NIA2  |                                                                                                         | Stomatal aperture not affected by treatment with sodium nitroprusside (SNP).                                                                                                                                                                                                                                                                                                                                                                                                                                                                                                                                         | 16367958 | 1 | 1 |
| AT1G08860 | BON3  |                                                                                                         | Seedling lethal at 22 and 28C.                                                                                                                                                                                                                                                                                                                                                                                                                                                                                                                                                                                       | 16367962 | 1 | 1 |
| AT1G08860 | BON3  |                                                                                                         | Seedling lethal at 22C. Viable at 28C.                                                                                                                                                                                                                                                                                                                                                                                                                                                                                                                                                                               | 16367962 | 1 | 0 |
| AT1G04250 | IAA17 |                                                                                                         | Less sensitive to brassinolide than wildtype, in terms of dark-grown hypocotyl elongation.                                                                                                                                                                                                                                                                                                                                                                                                                                                                                                                           | 16367964 | 1 | 1 |
| AT1G04250 | IAA17 |                                                                                                         | The mutant is less affected by brassinolide than wildtype with regard to inhibition of root elongation.                                                                                                                                                                                                                                                                                                                                                                                                                                                                                                              | 16367964 | 1 | 1 |
| AT1G63440 | HMA5  |                                                                                                         | Accumulation of Cu in both roots and shoots of mutant when grown on medium containing 10 &#956;M Cu.                                                                                                                                                                                                                                                                                                                                                                                                                                                                                                                 | 16367966 | 1 | 1 |
| AT1G63440 | HMA5  |                                                                                                         | During early stages of development, the seedlings are chlorotic and smaller than wild-type.                                                                                                                                                                                                                                                                                                                                                                                                                                                                                                                          | 16367966 | 1 | 1 |
| AT1G63440 | HMA5  |                                                                                                         | Increasingly retarded development of seedlings when grown on media containing increasing concentrations of Cu.                                                                                                                                                                                                                                                                                                                                                                                                                                                                                                       | 16367966 | 1 | 1 |
| AT1G63440 | HMA5  |                                                                                                         | Seedlings germination is totally arrested (both aerial parts and roots) when grown on 50 microM Cu.                                                                                                                                                                                                                                                                                                                                                                                                                                                                                                                  | 16367966 | 1 | 1 |
| AT1G63440 | HMA5  |                                                                                                         | Seedlings grown on 30 &#956;M Cu display yellow cotyledons, with completely arrested root growth.                                                                                                                                                                                                                                                                                                                                                                                                                                                                                                                    | 16367966 | 1 | 1 |
| AT1G18350 | MKK7  | BUD1                                                                                                    | bud1 plants develop significantly fewer lateral roots, simpler venation patterns, and a quicker and greater curvature in the gravitropism assay. In addition, the bud1 plants have shorter hypocotyls at high temperature (29C) under light, which is a characteristic feature of defective auxin action. Determination of tritium-labeled indole-3-acetic acid transport showed that the increased expression of MKK7 in bud1 or the repressed expression in MKK7 antisense transgenic plants causes deficiency or enhancement in auxin transport, indicating that MKK7 negatively regulates polar auxin transport. | 16377756 | 3 | 2 |
| AT1G48050 | KUS0  | ATKUS0 KUS0-LIKE PROTEIN                                                                                | Increased susceptibility to T-DNA transformation.                                                                                                                                                                                                                                                                                                                                                                                                                                                                                                                                                                    | 16380432 | 1 | 0 |
| AT1G80100 | HP6   | AHP6                                                                                                    | increased number of vascular cell files with intervening procambial and phloem cell files; protoxylem differentiation occurred sporadically along the root                                                                                                                                                                                                                                                                                                                                                                                                                                                           | 16400151 | 2 | 1 |
| AT1G80100 | HP6   | AHP6                                                                                                    | increased number of vascular cell files with intervening procambial and phloem cell files; protoxylem differentiation occurred sporadically along the root                                                                                                                                                                                                                                                                                                                                                                                                                                                           | 16400151 | 2 | 1 |
| AT1G58200 | MSL3  |                                                                                                         | no observable phenotype                                                                                                                                                                                                                                                                                                                                                                                                                                                                                                                                                                                              | 16401419 |   |   |
| AT1G27320 | AHK3  | ORE12                                                                                                   | delayed leaf senescence; chlorophyll content and the photochemical efficiency of photosystem II (Fv/Fm) physiological markers of leaf senescence, were maintained at higher levels in the ore12-1 mutant with age of the leaves; chlorophyll a/b-binding protein (CAB) gene and a senescence-associated gene SAG12 were expressed at higher and lower levels, respectively; mutation greatly delayed dark-induced leaf senescence                                                                                                                                                                                    | 16407152 | 4 | 4 |

|           |         |                                            |                                                                                                                                                                                                                                                                                                                                                                                                                                                                                                                                                                                                                                                                                                                                                                                                                                                               |          |   |   |
|-----------|---------|--------------------------------------------|---------------------------------------------------------------------------------------------------------------------------------------------------------------------------------------------------------------------------------------------------------------------------------------------------------------------------------------------------------------------------------------------------------------------------------------------------------------------------------------------------------------------------------------------------------------------------------------------------------------------------------------------------------------------------------------------------------------------------------------------------------------------------------------------------------------------------------------------------------------|----------|---|---|
| AT1G78390 | NCED9   |                                            | No visible phenotype was observed during vegetative stage. When germinated on medium supplemented with paclobutrazol, germination rate was higher in double mutant seeds than in the single mutants or wild type, i.e., paclobutrazol resistance was enhanced in double mutant seeds. Dormancy was reduced in double mutants, and levels of ABA in the seeds were up to 18% lower than in the wild type or single mutants.                                                                                                                                                                                                                                                                                                                                                                                                                                    | 16412079 | 3 | 3 |
| AT1G30950 | UFO     | AT1G30950, F17F8.16, UNUSUAL FLORAL ORGANS | Petals are usually missing in ufo-11 flowers or are sometimes replaced by filaments or petal/stamen mosaic organs. ufo-11 flowers have fewer second-whorl organs compared with rbe-3 mutants and also sometimes produce mosaic petaloid stamens in the third whorl.                                                                                                                                                                                                                                                                                                                                                                                                                                                                                                                                                                                           | 16412084 | 3 | 1 |
| AT1G30950 | UFO     | AT1G30950, F17F8.17, UNUSUAL FLORAL ORGANS | Double-mutant flowers have a phenotype that is similar to ufo-11 flowers.                                                                                                                                                                                                                                                                                                                                                                                                                                                                                                                                                                                                                                                                                                                                                                                     | 16412084 | 1 | 0 |
| AT1G30950 | UFO     | AT1G30950, F17F8.18, UNUSUAL FLORAL ORGANS | Double mutant has the same phenotype as the ufo-2 single mutant. There is no increase in the number of filaments and/or staminoid organs in the double mutant as compared with ufo-2.                                                                                                                                                                                                                                                                                                                                                                                                                                                                                                                                                                                                                                                                         | 16412084 | 1 | 0 |
| AT1G74660 | MIF1    | mini zinc finGer 1                         | Constitutive overexpression of MIF1 caused dramatic developmental defects, including dwarfism, reduced apical dominance, extreme longevity, dark-green leaves, altered flower morphology, poor fertility, reduced hypocotyl length, spoon-like cotyledons, reduced root growth, and ectopic root hairs on hypocotyls and cotyledons. In addition, 35S::MIF1 seedlings underwent constitutive photomorphogenesis in the dark, with root growth similar to that in the light. Furthermore, 35S::MIF1 seedlings were demonstrated to be non-responsive to gibberellin (GA) for cell elongation, hypersensitive to the GA synthesis inhibitor paclobutrazol (PAC) and abscisic acid (ABA), and hypersensitive to auxin, brassinosteroid and cytokinin, but normally responsive to ethylene. The de-etiolation defect could not be rescued by the hormones tested. | 16412086 | 4 | 2 |
| AT1G15570 | CYCA2-3 | CYC3C                                      | Homozygous mutant plants [CYCA2;3(-/-)] did not show any phenotype with morphology or growth rates obviously different from those of the wild type. However, the nuclei in trichomes of the mutant plants were larger than those of wild-type trichomes. The proportion of trichomes with four branches was significantly higher and that of three-branch trichomes was significantly lower in the mutant than in the wild type. The mutation significantly increased the proportion of cells with a ploidy levels of 16C or higher                                                                                                                                                                                                                                                                                                                           | 16415207 | 4 | 1 |
| AT1G64670 | BDG1    | BODYGUARD1 CED1                            | Abnormal leaf shape and size, fused organs, abnormal cuticle with increased wax layers, increased wax content, reduced trichome numbers.                                                                                                                                                                                                                                                                                                                                                                                                                                                                                                                                                                                                                                                                                                                      | 16415209 | 3 | 1 |
| AT1G53700 | WAG1    | PK3                                        | Similar to wild type when seedlings were grown on vertical plates.                                                                                                                                                                                                                                                                                                                                                                                                                                                                                                                                                                                                                                                                                                                                                                                            | 16460509 | 1 | 1 |
| AT1G53700 | WAG1    | PK3                                        | Morphologically similar to wild type. When seedlings were grown on vertical plates, root exhibited pronounced wavy pattern.                                                                                                                                                                                                                                                                                                                                                                                                                                                                                                                                                                                                                                                                                                                                   | 16460509 | 2 | 2 |
| AT1G53700 | WAG1    | PK3                                        | Morphologically similar to wild type. When seedlings were grown on vertical plates, root exhibited slight wavy pattern. Overall phenotype identical to wag1-1 mutant allele.                                                                                                                                                                                                                                                                                                                                                                                                                                                                                                                                                                                                                                                                                  | 16460509 | 3 | 3 |
| AT1G53700 | WAG1    | PK3                                        | Morphologically similar to double mutant wag1-1/wag2-1. When seedlings were grown on vertical plates, root exhibited pronounced wavy pattern. Gravitropism was not affected in mutant plants. Double mutant plants were more resistant to inhibition of root curling by auxin transport inhibitor NPA than wild type plants.                                                                                                                                                                                                                                                                                                                                                                                                                                                                                                                                  | 16460509 | 3 | 2 |
| AT1G80340 | GA3OX2  | GA4H                                       | 30% smaller in leaf diameter and 37% shorter than single mutant ga3ox1-3.                                                                                                                                                                                                                                                                                                                                                                                                                                                                                                                                                                                                                                                                                                                                                                                     | 16460513 | 1 | 0 |
| AT1G80340 | GA3OX2  | GA4H                                       | Dwarf phenotype.                                                                                                                                                                                                                                                                                                                                                                                                                                                                                                                                                                                                                                                                                                                                                                                                                                              | 16460513 | 1 | 0 |
| AT1G80340 | GA3OX2  | GA4H                                       | Increased levels of GA9.                                                                                                                                                                                                                                                                                                                                                                                                                                                                                                                                                                                                                                                                                                                                                                                                                                      | 16460513 | 1 | 0 |
| AT1G80340 | GA3OX2  | GA4H                                       | Same number of leaves as wildtype but flowers seven days later.                                                                                                                                                                                                                                                                                                                                                                                                                                                                                                                                                                                                                                                                                                                                                                                               | 16460513 | 1 | 0 |
| AT1G80340 | GA3OX2  | GA4H                                       | Seeds failed to germinate in the dark and only 5% germinate in light conditions.                                                                                                                                                                                                                                                                                                                                                                                                                                                                                                                                                                                                                                                                                                                                                                              | 16460513 | 1 | 1 |
| AT1G80340 | GA3OX2  | GA4H                                       | Severe decrease in levels of bioactive GA.                                                                                                                                                                                                                                                                                                                                                                                                                                                                                                                                                                                                                                                                                                                                                                                                                    | 16460513 | 1 | 0 |
| AT1G80340 | GA3OX2  | GA4H                                       | Severe defect in root length.                                                                                                                                                                                                                                                                                                                                                                                                                                                                                                                                                                                                                                                                                                                                                                                                                                 | 16460513 | 1 | 0 |
| AT1G80340 | GA3OX2  | GA4H                                       | Root length similar to that of wildtype.                                                                                                                                                                                                                                                                                                                                                                                                                                                                                                                                                                                                                                                                                                                                                                                                                      | 16460513 | 1 | 0 |
| AT1G80340 | GA3OX2  | GA4H                                       | Seed germination similar to wildtype in both dark and light conditions.                                                                                                                                                                                                                                                                                                                                                                                                                                                                                                                                                                                                                                                                                                                                                                                       | 16460513 | 1 | 1 |
| AT1G15550 | GA3OX1  | GA4                                        | Decrease in levels of bioactive GA.                                                                                                                                                                                                                                                                                                                                                                                                                                                                                                                                                                                                                                                                                                                                                                                                                           | 16460513 | 1 | 1 |
| AT1G15550 | GA3OX1  | GA4                                        | Increased levels of GA9.                                                                                                                                                                                                                                                                                                                                                                                                                                                                                                                                                                                                                                                                                                                                                                                                                                      | 16460513 | 1 | 1 |
| AT1G15550 | GA3OX1  | GA4                                        | Roots shorter than that of wildtype.                                                                                                                                                                                                                                                                                                                                                                                                                                                                                                                                                                                                                                                                                                                                                                                                                          | 16460513 | 1 | 0 |
| AT1G15550 | GA3OX1  | GA4                                        | Same number of leaves as wildtype but flowers three days later.                                                                                                                                                                                                                                                                                                                                                                                                                                                                                                                                                                                                                                                                                                                                                                                               | 16460513 | 1 | 1 |
| AT1G15550 | GA3OX1  | GA4                                        | Seed germination similar to wildtype in both dark and light conditions.                                                                                                                                                                                                                                                                                                                                                                                                                                                                                                                                                                                                                                                                                                                                                                                       | 16460513 | 1 | 0 |
| AT1G15550 | GA3OX1  | GA4                                        | Semi-dwarf phenotype.                                                                                                                                                                                                                                                                                                                                                                                                                                                                                                                                                                                                                                                                                                                                                                                                                                         | 16460513 | 1 | 1 |
| AT1G15550 | GA3OX1  | GA4                                        | 30% smaller in leaf diameter and 37% shorter than single mutant ga3ox1-3.                                                                                                                                                                                                                                                                                                                                                                                                                                                                                                                                                                                                                                                                                                                                                                                     | 16460513 | 1 | 1 |
| AT1G15550 | GA3OX1  | GA4                                        | Dwarf phenotype.                                                                                                                                                                                                                                                                                                                                                                                                                                                                                                                                                                                                                                                                                                                                                                                                                                              | 16460513 | 1 | 1 |
| AT1G15550 | GA3OX1  | GA4                                        | Same number of leaves as wildtype but flowers seven days later.                                                                                                                                                                                                                                                                                                                                                                                                                                                                                                                                                                                                                                                                                                                                                                                               | 16460513 | 1 | 1 |
| AT1G15550 | GA3OX1  | GA4                                        | Seeds failed to germinate in the dark and only 5% germinate in light conditions.                                                                                                                                                                                                                                                                                                                                                                                                                                                                                                                                                                                                                                                                                                                                                                              | 16460513 | 1 | 1 |
| AT1G15550 | GA3OX1  | GA4                                        | Severe decrease in levels of bioactive GA.                                                                                                                                                                                                                                                                                                                                                                                                                                                                                                                                                                                                                                                                                                                                                                                                                    | 16460513 | 1 | 1 |
| AT1G15550 | GA3OX1  | GA4                                        | Severe defect in root length.                                                                                                                                                                                                                                                                                                                                                                                                                                                                                                                                                                                                                                                                                                                                                                                                                                 | 16460513 | 1 | 1 |
| AT1G19220 | ARF19   |                                            | Long hypocotyl and elongated primary roots when germinated and grown on MS with sirtinol in darkness. Auxin resistant in both light and dark. Roots are less sensitive to the ethylene precursor ACC than wt roots.                                                                                                                                                                                                                                                                                                                                                                                                                                                                                                                                                                                                                                           | 16461383 | 3 | 2 |
| AT1G19220 | ARF19   |                                            | Dark grown seedlings on sirtinol have both long primary roots and long hypocotyls. More resistant to 2,4-D and IAA than single mutants in both light and dark. The ethylene resistant root phenotype of arf19-101 is enhanced by arf7-201.                                                                                                                                                                                                                                                                                                                                                                                                                                                                                                                                                                                                                    | 16461383 | 3 | 1 |
| AT2G02810 | UTR1    |                                            | ER-derived vesicles obtained from atutr1 plants had a decreased uptake of UDP-glucose compared to the wild type. BiP and Calnexin are overexpressed in the mutant, suggesting that atutr1 plants have the unfolded protein response constitutively activated.                                                                                                                                                                                                                                                                                                                                                                                                                                                                                                                                                                                                 | 16467298 | 2 | 0 |
| AT1G71830 | SERK1   |                                            | Exacerbation of phenotypes observed for single mutant <i>bril-6</i>: petiole length, inward curling, inflorescence length and rosette size.                                                                                                                                                                                                                                                                                                                                                                                                                                                                                                                                                                                                                                                                                                                   | 16473966 | 1 | 1 |
| AT1G59870 | PEN3    |                                            | mutants allow increased penetration by inappropriate pathogens (eg barley powdery mildew <i>Blumeria graminis</i> f. sp. hordei, <i>Erysiphe pisi</i> (tribe <i>Erysipheae</i> ), and <i>B. g. hordei</i> (tribe <i>Blumerieae</i> )). pen3-1 mutants are resistant to <i>E. cichoracearum</i> and become chlorotic after <i>E. cichoracearum</i> infection.                                                                                                                                                                                                                                                                                                                                                                                                                                                                                                  | 16473969 | 2 | 2 |
| AT1G12240 | BFRUCT4 | BETAFRUCT4                                 | Significantly shorter roots. 50% reduction in vacuolar invertase (Vac-Inv) activity compared to parental line.                                                                                                                                                                                                                                                                                                                                                                                                                                                                                                                                                                                                                                                                                                                                                | 16481625 | 2 | 0 |
| AT1G10270 | GRP23   |                                            | Mutation is lethal D608 in the homozygous state.                                                                                                                                                                                                                                                                                                                                                                                                                                                                                                                                                                                                                                                                                                                                                                                                              | 16489121 | 1 | 1 |
| AT1G10270 | GRP23   |                                            | In addition to the arrested embryo phenotype, aberrant cell divisions were also observed; These resulted in the formation of an elongated apical cell or embryo proper instead of the typical globular embryo in wild-type plants. A notable phenotype of the set09078 mutant is that ~19% of the mutant embryos displayed aberrant positioning of the division planes and asynchronous divisions. Furthermore, asynchronous divisions of the embryo proper and suspensor cells were observed.                                                                                                                                                                                                                                                                                                                                                                | 16489121 | 1 | 1 |
| AT1G10270 | GRP23   |                                            | In the homozygous mutant progeny, embryo development was arrested at the early globular stage. Although the normal embryos continued to develop, the arrested embryos subsequently became shriveled and finally degenerated. The mutant embryos never reached the heart stage but arrested by the early globular stage. Despite the aberrant embryo development phenotype, no developmental defect was observed during endosperm development in the mutant ovules.                                                                                                                                                                                                                                                                                                                                                                                            | 16489121 | 3 | 3 |
| AT1G10270 | GRP23   |                                            | Of the 269 mutant embryos examined, 6% were arrested at the 1-cell embryo stage, 19% were arrested at the 2- to 4-cell stage, 38% were arrested from the 6-cell to the 8-cell stage, and 18% were arrested at the 16-cell stage.                                                                                                                                                                                                                                                                                                                                                                                                                                                                                                                                                                                                                              | 16489121 | 2 | 0 |
| AT1G31800 | CYP97A3 |                                            | 18% reduction in lutein and accumulates &#945;-cryptoxanthin and &#945;-carotene. The latter was shown to be almost exclusively localized in photosystems.                                                                                                                                                                                                                                                                                                                                                                                                                                                                                                                                                                                                                                                                                                    | 16492736 | 2 | 1 |
| AT1G31800 | CYP97A3 |                                            | Decrease in &#946;-carotene level.                                                                                                                                                                                                                                                                                                                                                                                                                                                                                                                                                                                                                                                                                                                                                                                                                            | 16492736 | 1 | 0 |
| AT1G31800 | CYP97A3 |                                            | Reduction in total &#946;-carotenoids and increase in total &#946;-&#945;-carotenoids.                                                                                                                                                                                                                                                                                                                                                                                                                                                                                                                                                                                                                                                                                                                                                                        | 16492736 | 2 | 1 |
| AT1G31800 | CYP97A3 |                                            | Accumulates &#945;-carotene and zeinoxanthin at levels nearly identical to lut5-1 and lut1-1 single mutants, respectively.                                                                                                                                                                                                                                                                                                                                                                                                                                                                                                                                                                                                                                                                                                                                    | 16492736 | 1 | 0 |
| AT1G31800 | CYP97A3 |                                            | Same as lut5-1 but weaker allele.                                                                                                                                                                                                                                                                                                                                                                                                                                                                                                                                                                                                                                                                                                                                                                                                                             | 16492736 | 1 | 0 |
| AT1G03310 | ISA2    | DBE1                                       | No reduction in maltose and matotriose production.                                                                                                                                                                                                                                                                                                                                                                                                                                                                                                                                                                                                                                                                                                                                                                                                            | 16495218 | 1 | 0 |
| AT1G64440 | UGE4    | REB1 RHD1                                  | Less galactose in root cell wall compared to wildtype. No difference in shoot cell wall monosaccharide composition.                                                                                                                                                                                                                                                                                                                                                                                                                                                                                                                                                                                                                                                                                                                                           | 16500990 | 2 | 2 |
| AT1G64440 | UGE4    | REB1 RHD1                                  | No observed effect of the structure of both rhamnosylacturonan I and II.                                                                                                                                                                                                                                                                                                                                                                                                                                                                                                                                                                                                                                                                                                                                                                                      | 16500990 | 1 | 0 |
| AT1G64440 | UGE4    | REB1 RHD1                                  | Root length defect was restored when mutant was grown on 10mM galactose.                                                                                                                                                                                                                                                                                                                                                                                                                                                                                                                                                                                                                                                                                                                                                                                      | 16500990 | 1 | 1 |
| AT1G64440 | UGE4    | REB1 RHD1                                  | Structural changes of xyloglucan in roots, not in shoots.                                                                                                                                                                                                                                                                                                                                                                                                                                                                                                                                                                                                                                                                                                                                                                                                     | 16500990 | 1 | 1 |
| AT1G64440 | UGE4    | REB1 RHD1                                  | Using the monoclonal antibody CCRC-M1, specific for &#945;-L-fuc<i>(1-2)</i>-&#946;-D-Gal<i>(1-3)</i> side chains, swollen trichoblasts were not stained while atrichoblasts and non swollen trichoblasts were. All cell types were stained in wildtype. Staining was restored when the mutant was grown on 10mM D-galactose.                                                                                                                                                                                                                                                                                                                                                                                                                                                                                                                                 | 16500990 | 1 | 1 |

|           |        |                                   |                                                                                                                                                                                                                                                                                                                                                                                                                                                                                                                                                                                                                                                                                                                                                                                              |          |   |   |
|-----------|--------|-----------------------------------|----------------------------------------------------------------------------------------------------------------------------------------------------------------------------------------------------------------------------------------------------------------------------------------------------------------------------------------------------------------------------------------------------------------------------------------------------------------------------------------------------------------------------------------------------------------------------------------------------------------------------------------------------------------------------------------------------------------------------------------------------------------------------------------------|----------|---|---|
| ATIG10760 | SEX1   |                                   | Starch content similar to that observed in the sex1-3 single mutant, and different from that of sex4-5. At the end of the light period, the starch content of the double mutant was 1.7-fold that of sex4-5, and not different from that of sex1-3. At the end of the dark period, its starch content was twice that of sex4-5, and 80% of that of sex1-3.                                                                                                                                                                                                                                                                                                                                                                                                                                   | 16513634 | 3 | 1 |
| ATIG79840 | GL2    | GLABRA 2 HOMEBOX PROTEIN GLABRA 2 | No leaf trichomes. Has lower seed density and higher (8% increase) seed oil content. No difference in seed size, weight, or fatty acid composition.                                                                                                                                                                                                                                                                                                                                                                                                                                                                                                                                                                                                                                          | 16514561 |   |   |
| ATIG32990 | RPL11  |                                   | Defective in both mitochondrial and plastid gene expression.                                                                                                                                                                                                                                                                                                                                                                                                                                                                                                                                                                                                                                                                                                                                 | 16517761 | 1 | 1 |
| ATIG32990 | RPL11  |                                   | Double mutant leaves were identical to those of the prpl11-1 single mutant in terms of thylakoid protein composition and photosynthetic performance.                                                                                                                                                                                                                                                                                                                                                                                                                                                                                                                                                                                                                                         | 16517761 | 1 | 0 |
| ATIG32990 | RPL11  |                                   | No increase in H2O2 content in light- or dark-adapted mutant plants.                                                                                                                                                                                                                                                                                                                                                                                                                                                                                                                                                                                                                                                                                                                         | 16517761 | 1 | 0 |
| ATIG32990 | RPL11  |                                   | Pale-green leaves and a drastic reduction in size.                                                                                                                                                                                                                                                                                                                                                                                                                                                                                                                                                                                                                                                                                                                                           | 16517761 | 1 | 1 |
| ATIG32990 | RPL11  |                                   | The photosynthetic performance of the double mutant is identical to that of prpl11-1 plants (Fv/Fm, 0.69 versus 0.79 in the wild type; &Phi;II, 0.53 versus 0.75 in the wild type; 1-qP, 0.06 versus 0.05 in the wild type).                                                                                                                                                                                                                                                                                                                                                                                                                                                                                                                                                                 | 16517761 | 2 | 1 |
| ATIG32990 | RPL11  |                                   | prors1-like transcriptional response.                                                                                                                                                                                                                                                                                                                                                                                                                                                                                                                                                                                                                                                                                                                                                        | 16517761 | 1 | 0 |
| ATIG62750 |        |                                   | Chloroplast differentiation was severely impaired in cotyledons but not in true leaves during early seedling growth, giving rise to the seedlings with white cotyledons. In scot chloroplast biosynthesis is slowed down leading to a delayed greening in cotyledons. Seed germination was delayed too in both, dark-grown seeds and light exposed seeds. Adult mutant plants had flowering time delayed for a week, while plant senescence was not affected. Mutant plants had reduced fresh weight throughout the life cycle. Seed set was affected too; mutant plants had reached only 40% of amount of seeds produced by the wild type plants.                                                                                                                                           | 16525888 |   |   |
| ATIG19250 | FM01   |                                   | Loss of RPP2 resistance without effect on salicylic acid accumulation; increased susceptibility to virulent <i>Pseudomonas syringae</i> infection.                                                                                                                                                                                                                                                                                                                                                                                                                                                                                                                                                                                                                                           | 16531493 | 2 | 1 |
| ATIG02910 | LPA1   | LOW PSII ACCUMULATION1            | The leaves of the mutant are paler than those of the wild type, and growth is significantly reduced. The leaf area of the mutant is ~75% lower than that of wild-type plants 26 d after germination.                                                                                                                                                                                                                                                                                                                                                                                                                                                                                                                                                                                         | 16531500 | 2 | 0 |
| ATIG02910 | LPA1   | LOW PSII ACCUMULATION1            | The mutants have defects in energy transfer within PSII or a partial loss of PSII capacity.                                                                                                                                                                                                                                                                                                                                                                                                                                                                                                                                                                                                                                                                                                  | 16531500 | 1 | 0 |
| ATIG02910 | LPA1   | LOW PSII ACCUMULATION1            | The relative amounts of the PSII core subunits CP47, CP43, D1, and D2 is greatly reduced in the mutant, especially the PSII dimer.                                                                                                                                                                                                                                                                                                                                                                                                                                                                                                                                                                                                                                                           | 16531500 | 1 | 0 |
| ATIG02910 | LPA1   | LOW PSII ACCUMULATION1            | Wild-type chloroplasts are larger than those of the mutant and have a larger number of discs per grana stack on average. In addition, the wild-type chloroplasts display well-developed membrane systems composed of grana connected by the stroma lamellae, but the thylakoid membrane systems in mutant chloroplasts are disturbed, and the membrane spacing is not as clear.                                                                                                                                                                                                                                                                                                                                                                                                              | 16531500 | 1 | 0 |
| ATIG78580 | TPS1   |                                   | Arrest at torpedo stage during embryo development. Can germinate after cold stratification and extended incubation. Embryos show increased deposition of cell wall material.                                                                                                                                                                                                                                                                                                                                                                                                                                                                                                                                                                                                                 | 16553896 | 3 | 2 |
| ATIG78580 | TPS1   |                                   | Enzymatic activities that typically peak during early maturation of wildtype embryos are also detected in the mutant at 12 DAF. Of these, both NAD-malic E and IDH activities then decrease significantly at 15 DAF and the expected drop in PFK activity is delayed.                                                                                                                                                                                                                                                                                                                                                                                                                                                                                                                        | 16553903 | 2 | 1 |
| ATIG78580 | TPS1   |                                   | G6PDH, 6PGDH, AGPase and GK activities, which typically peak at 9-12 DAF in wildtype, all show a reduction at the equivalent temporal stage in the mutant.                                                                                                                                                                                                                                                                                                                                                                                                                                                                                                                                                                                                                                   | 16553903 | 1 | 1 |
| ATIG78580 | TPS1   |                                   | With the exception of ADH, all other enzymatic activities increase with the onset of maturation.                                                                                                                                                                                                                                                                                                                                                                                                                                                                                                                                                                                                                                                                                             | 16553903 | 1 | 1 |
| ATIG13980 | GN     | EMB30 GBF3 MIZ2 VAN7              | Mutant embryos exhibit wildtype-like staining patterns for most of the activities analysed: G6PDH, 6PGDH, GK, PGM, PGI and ADH.                                                                                                                                                                                                                                                                                                                                                                                                                                                                                                                                                                                                                                                              | 16553903 | 1 | 0 |
| ATIG68480 | JAG    | JAGGED                            | Strong enhancement of defects in leaf, stamen and carpel development compared with jag single mutants.                                                                                                                                                                                                                                                                                                                                                                                                                                                                                                                                                                                                                                                                                       | 16554365 | 1 | 1 |
| ATIG13400 | JGL    | NUB                               | Strong enhancement of defects in leaf, stamen and carpel development compared with jag single mutants.                                                                                                                                                                                                                                                                                                                                                                                                                                                                                                                                                                                                                                                                                       | 16554365 | 1 | 1 |
| ATIG13400 | JGL    | NUB                               | no visible phenotypic effect                                                                                                                                                                                                                                                                                                                                                                                                                                                                                                                                                                                                                                                                                                                                                                 | 16554365 | 1 | 0 |
| ATIG69940 | PPME1  | ARATH9                            | 20% decrease in pectin methylesterase activity compared to wild-type.                                                                                                                                                                                                                                                                                                                                                                                                                                                                                                                                                                                                                                                                                                                        | 16564517 |   |   |
| ATIG69940 | PPME1  | ARATH9                            | Curved, irregular morphology of pollen tubes, which are drastically stunted. This phenotype is visible early in the germination process (6h after germination). The pollen tube remains dramatically shorter as growth proceeds (tested at 24h after germination).                                                                                                                                                                                                                                                                                                                                                                                                                                                                                                                           | 16564517 |   |   |
| ATIG69940 | PPME1  | ARATH9                            | No obvious differences in the morphology of the ungerminated pollen grains.                                                                                                                                                                                                                                                                                                                                                                                                                                                                                                                                                                                                                                                                                                                  | 16564517 |   |   |
| ATIG69940 | PPME1  | ARATH9                            | Seed production and fertility are similar to those of wild-type.                                                                                                                                                                                                                                                                                                                                                                                                                                                                                                                                                                                                                                                                                                                             | 16564517 |   |   |
| ATIG69940 | PPME1  | ARATH9                            | The average rate of pollen tube elongation is significantly lower than that of wild-type.                                                                                                                                                                                                                                                                                                                                                                                                                                                                                                                                                                                                                                                                                                    | 16564517 |   |   |
| ATIG24490 | ALB4   | ALBINA 4 ARTEMIS                  | Mutant plants have altered shape of chloroplasts. Plastids somewhat larger (~20%) and more spherical in appearance compared to that of wild-type plants of the same stage and in the same tissue. The grana stacks in mesophyll cells of mutant plants are less appressed than in the wild-type chloroplasts whereas the structure of the stacks is not affected.                                                                                                                                                                                                                                                                                                                                                                                                                            | 16595657 | 3 | 1 |
| ATIG80840 | WRKY40 |                                   | sixfold reduction in the growth of the bacterial pathogen PstDC3000                                                                                                                                                                                                                                                                                                                                                                                                                                                                                                                                                                                                                                                                                                                          | 16603654 | 1 | 1 |
| ATIG80840 | WRKY40 |                                   | Ninefold reduction in the growth of the bacterial pathogen PstDC3000, extensive chlorosis, more susceptible to the fungal pathogen <i>B. cinerea</i> than the double mutants.                                                                                                                                                                                                                                                                                                                                                                                                                                                                                                                                                                                                                | 16603654 | 3 | 2 |
| ATIG80840 | WRKY40 |                                   | little reduction in the growth of the bacterial pathogen PstDC3000                                                                                                                                                                                                                                                                                                                                                                                                                                                                                                                                                                                                                                                                                                                           | 16603654 | 1 | 1 |
| ATIG80840 | WRKY40 |                                   | no reduction in the growth of the bacterial pathogen PstDC3000.                                                                                                                                                                                                                                                                                                                                                                                                                                                                                                                                                                                                                                                                                                                              | 16603654 | 1 | 1 |
| ATIG22770 | GI     |                                   | Observed temperature-dependent effects on both period and rhythm robustness as those seen in gi-11.                                                                                                                                                                                                                                                                                                                                                                                                                                                                                                                                                                                                                                                                                          | 16617099 | 1 | 1 |
| ATIG22770 | GI     |                                   | Although at 17°C, the gi mutant and the wild type have no significant period difference (measured by the free-running periods of the leaf movement rhythms), as the temperature increased (22 and 27°C), the period of the mutant becomes significantly shorter than that of the wild type.                                                                                                                                                                                                                                                                                                                                                                                                                                                                                                  | 16617099 | 2 | 2 |
| ATIG22770 | GI     |                                   | In addition to a shortening of the period, a temperature-dependent increase in the variance of period was seen for the mutant, with the variance increasing from 3.1 at 17°C to 18.0 at 27°C (F test P = 1.8x10 <sup>-9</sup> ). Although an increase in the variance of period with temperature was also observed for the wild type, this was not of the same magnitude (from 1.9 at 17°C to 3.8 at 27°C; F test P = 4.1x10 <sup>-3</sup> ).                                                                                                                                                                                                                                                                                                                                                | 16617099 | 2 | 2 |
| ATIG03160 | FZL    | FZO-like                          | Similar to SALK 033745 line                                                                                                                                                                                                                                                                                                                                                                                                                                                                                                                                                                                                                                                                                                                                                                  | 16617119 | 1 | 0 |
| ATIG03160 | FZL    | FZO-like                          | The leaves were visibly pale, and flowering was delayed by 5-7 days compared with the wild type plants. Mature mesophyll cells in mutant leaves contained fewer, larger chloroplasts than in wild type, and these were heterogeneous in size. This phenotype was more pronounced in older than in younger leaves. Mesophyll cell chloroplasts in wild type and mutant plants also differed ultrastructurally. In mutants, grana lamellae were less uniform in length and stacked in a staggered fashion, giving rise to a disorganized thylakoid array. Stroma thylakoids appeared less abundant than in wild type chloroplasts. In contrast, stroma thylakoids in mutants were similar in length to those in wild type but constituted a smaller proportion of the total thylakoid network. | 16617119 | 5 | 0 |
| ATIG74710 | ICS1   |                                   | Defective in phytylquinone biosynthesis.                                                                                                                                                                                                                                                                                                                                                                                                                                                                                                                                                                                                                                                                                                                                                     | 16617180 | 1 | 1 |
| ATIG74710 | ICS1   |                                   | Contains about 18% of wild-type phytylquinone content but 50-70% of wild-type PSI activity.                                                                                                                                                                                                                                                                                                                                                                                                                                                                                                                                                                                                                                                                                                  | 16617180 | 2 | 2 |
| ATIG68890 | PHYLLO |                                   | Defective in phytylquinone biosynthesis.                                                                                                                                                                                                                                                                                                                                                                                                                                                                                                                                                                                                                                                                                                                                                     | 16617180 | 1 | 1 |
| ATIG68890 | PHYLLO |                                   | Exhibits 5-15% of wild-type D647 I (PSI) activity whereas that of photosystem II (PSII) is only reduced to about 75% of wild-type levels.                                                                                                                                                                                                                                                                                                                                                                                                                                                                                                                                                                                                                                                    | 16617180 | 1 | 0 |
| ATIG68890 | PHYLLO |                                   | High chlorophyll fluorescence (hcf) phenotype associated with photosynthetic lesion.                                                                                                                                                                                                                                                                                                                                                                                                                                                                                                                                                                                                                                                                                                         | 16617180 | 1 | 1 |
| ATIG68890 | PHYLLO |                                   | Levels of chlorophyll are 41% of wild-type levels. When grown in the presence of the metabolic precursor 1,4-dihydroxy-2-naphthoate (NA), mutant plants exhibit wild-type levels of chlorophyll.                                                                                                                                                                                                                                                                                                                                                                                                                                                                                                                                                                                             | 16617180 | 2 | 2 |
| ATIG68890 | PHYLLO |                                   | Mutant plants fail to quench the fluorescence efficiently upon illumination, indicating that the limiting step of the linear electron transport lies behind PSII.                                                                                                                                                                                                                                                                                                                                                                                                                                                                                                                                                                                                                            | 16617180 | 1 | 0 |
| ATIG68890 | PHYLLO |                                   | Reduced PSI stability.                                                                                                                                                                                                                                                                                                                                                                                                                                                                                                                                                                                                                                                                                                                                                                       | 16617180 | 1 | 0 |
| ATIG68890 | PHYLLO |                                   | Seedling lethal.                                                                                                                                                                                                                                                                                                                                                                                                                                                                                                                                                                                                                                                                                                                                                                             | 16617180 | 1 | 0 |
| ATIG18870 | ICS2   | ATICS2 isochorismate synthase 2   | Defective in phytylquinone biosynthesis.                                                                                                                                                                                                                                                                                                                                                                                                                                                                                                                                                                                                                                                                                                                                                     | 16617180 | 1 | 0 |
| ATIG18870 | ICS2   | ATICS2 isochorismate synthase 2   | Contains about 18% of wild-type phytylquinone content but 50-70% of wild-type PSI activity.                                                                                                                                                                                                                                                                                                                                                                                                                                                                                                                                                                                                                                                                                                  | 16617180 | 2 | 1 |
| ATIG64070 | RLM1   |                                   | Reduced resistance to <i>Leptosphaeria maculans</i> , causal agent of blackleg disease.                                                                                                                                                                                                                                                                                                                                                                                                                                                                                                                                                                                                                                                                                                      | 16623885 | 1 | 1 |
| ATIG63880 |        | ATIG63880, T12P18_10, T12P18_10   | Reduced resistance to <i>Leptosphaeria maculans</i> , causal agent of blackleg disease.                                                                                                                                                                                                                                                                                                                                                                                                                                                                                                                                                                                                                                                                                                      | 16623885 | 1 | 0 |



|           |         |                                                                                                   |                                                                                                                                                                                                                                                                                                                                                                                                                                                                                                                                         |          |   |   |
|-----------|---------|---------------------------------------------------------------------------------------------------|-----------------------------------------------------------------------------------------------------------------------------------------------------------------------------------------------------------------------------------------------------------------------------------------------------------------------------------------------------------------------------------------------------------------------------------------------------------------------------------------------------------------------------------------|----------|---|---|
| AT1G21270 | WAK2    |                                                                                                   | On pond water without sucrose, most wak2-1 seedlings arrested or slowed growth. The wak2-1 seedlings were significantly ( $P < 0.001$ ) shorter than wild-type, with the roots being affected more than the hypocotyls. Arrest of wak2-1 on pond water was rescued by the addition of 60 mM sucrose, fructose or glucose, but not sorbitol or mannitol. When grown in the dark for 3 weeks on soil, wak2-1 plants have less hypocotyl extension than wild type. wak2-1 affects the rate of cell elongation in roots. than the wild-type | 16623892 | 6 | 1 |
| AT1G32240 | KAN2    | KANADI 2                                                                                          | Similar to kan1 kan2 double mutant. However, the ovules have a novel phenotype, forming a single amorphous structure in place of both integuments.                                                                                                                                                                                                                                                                                                                                                                                      | 16623911 | 1 | 1 |
| AT1G32240 | KAN2    | KANADI 2                                                                                          | External structures of the carpel are largely absent. Ovules arise from a surface or column of tissue at the center of the flower. The inner integuments of these ovules are normal but the asymmetrical outer integument is now a nearly symmetrical and relatively amorphous collar of tissue.                                                                                                                                                                                                                                        | 16623911 | 1 | 1 |
| AT1G23420 | INO     | INNER NO OUTER                                                                                    | Outer integument of the ovule is absent and the inner integument is replaced by a relatively amorphous collar-like structure.                                                                                                                                                                                                                                                                                                                                                                                                           | 16623911 | 1 | 0 |
| AT1G69490 | NACO29  | ANACO29 NAC29 NAP                                                                                 | Significantly delayed leaf senescence.                                                                                                                                                                                                                                                                                                                                                                                                                                                                                                  | 16640597 | 1 | 1 |
| AT1G02580 | MEA     | EMB173 EMBRYO DEFECTIVE 173 FIS1 MEDEA SDGS                                                       | Mutant homozygous mea embryo sacs accumulated 45 times more maternal transcripts than wild-type before fertilization, and it persisted after fertilization (7.5 times more transcripts 4 d after pollination).                                                                                                                                                                                                                                                                                                                          | 16651654 | 1 | 0 |
| AT1G22700 |         |                                                                                                   | Plants grown on sucrose supplemented media have reduced growth rate. Seedlings have pale yellow leaves that are thinner and more transparent than wild type. Under UV light they display high chlorophyll fluorescence. Plants lack functional photosystem I. Chloroplasts are morphologically abnormal with few lamellae and no assimilatory starch.                                                                                                                                                                                   | 16679416 | 4 | 2 |
| AT1G69120 | API     | AGAMOUS-like 7 AGL7 APETALA1 ATAP1                                                                | Unlike the agl24-2 svp-4l double mutant, where severe phenotypes similar to the lug mutant were only observed when plants were grown at 30°C, in the apl-12 agl24-2 svp-4l triple mutant, severe lug-type phenotypes were observed under normal growing conditions (22°C).                                                                                                                                                                                                                                                              | 16679456 | 1 | 1 |
| AT1G69440 | AG07    | ZIP                                                                                               | Downward-curved leaf margins.                                                                                                                                                                                                                                                                                                                                                                                                                                                                                                           | 16682351 |   |   |
| AT1G50055 |         |                                                                                                   | No obvious leaf developmental defects.                                                                                                                                                                                                                                                                                                                                                                                                                                                                                                  | 16682351 |   |   |
| AT1G48410 | AG01    |                                                                                                   | TAS1, TAS2, and TAS3 ta-siRNAs were below detectable levels.                                                                                                                                                                                                                                                                                                                                                                                                                                                                            | 16682351 |   |   |
| AT1G66340 | ETR1    |                                                                                                   | Weak ethylene-insensitivity of etr1-2 is suppressed by rtl-2. Ethylene responses are similar to those of the wild type.                                                                                                                                                                                                                                                                                                                                                                                                                 | 16682642 | 1 | 1 |
| AT1G08430 | ALMT1   |                                                                                                   | On Al <sup>3+</sup> medium, the mutant has significantly shorter roots than the Col wild type. In the absence of aluminum stress, the roots of mutant and wild type grew similarly.                                                                                                                                                                                                                                                                                                                                                     | 16740662 | 1 | 1 |
| AT2G01830 | WOL     | AHK4 ARABIDOPSIS HISTIDINE KINASE 4 ATCRE1 CRE1 CYTOKININ RESPONSE 1 WOL1 WOODEN LEG WOODEN LEG 1 | No defect in root vasculature morphology.                                                                                                                                                                                                                                                                                                                                                                                                                                                                                               | 16753566 |   |   |
| AT2G01830 | WOL     | AHK4 ARABIDOPSIS HISTIDINE KINASE 4 ATCRE1 CRE1 CYTOKININ RESPONSE 1 WOL1 WOODEN LEG WOODEN LEG 1 | Normal vascular morphology.                                                                                                                                                                                                                                                                                                                                                                                                                                                                                                             | 16753566 |   |   |
| AT2G01830 | WOL     | AHK4 ARABIDOPSIS HISTIDINE KINASE 4 ATCRE1 CRE1 CYTOKININ RESPONSE 1 WOL1 WOODEN LEG WOODEN LEG 1 | Strong suppression of wol-1 mutant phenotype. Phenotype close to that of wild-type.                                                                                                                                                                                                                                                                                                                                                                                                                                                     | 16753566 |   |   |
| AT2G01830 | WOL     | AHK4 ARABIDOPSIS HISTIDINE KINASE 4 ATCRE1 CRE1 CYTOKININ RESPONSE 1 WOL1 WOODEN LEG WOODEN LEG 1 | Weak suppression of wol-1 mutant phenotype. Phenotype intermediate between that of wol-1 and wild-type.                                                                                                                                                                                                                                                                                                                                                                                                                                 | 16753566 |   |   |
| AT1G15750 | TPL     | WSIP1                                                                                             | Embryos form cotyledons at the transition stage of embryogenesis that appear slightly stunted at later stages compared to wt embryos.                                                                                                                                                                                                                                                                                                                                                                                                   | 16783149 | 1 | 1 |
| AT1G15750 | TPL     | WSIP1                                                                                             | No obvious phenotype when grown at the restrictive temperature (29 degrees C) that produces the topless phenotype in the tpl-1 mutant.                                                                                                                                                                                                                                                                                                                                                                                                  | 16783149 | 1 | 1 |
| AT1G12410 | CLPR2   | NCLPP2                                                                                            | Yellow/pale-green phenotype and reduced growth. Reduced accumulation of ClpPRS complex. Reduced chloroplast size and thylakoid accumulation. Delayed plant development.                                                                                                                                                                                                                                                                                                                                                                 | 16766689 | 4 | 2 |
| AT1G78570 | RHM1    | ROL1                                                                                              | No significant differences in the amounts of the major sugars of cell wall material, including Rha, were identified between the WT and roll-2. However, roll-2 and lrx1 roll-2 showed an approx 30% reduction in the RG II-specific monosaccharides 2-O-methyl-D-xylose and 2-O-methyl-L-fucose. These methylated sugars are diagnostic components of the two large Rha-containing side chains of RG II, and their reduced abundance may reflect a defect in the synthesis of RG II.                                                    | 16766693 | 1 | 1 |
| AT1G32200 | ATS1    |                                                                                                   | altered fatty acid composition (strongly reduced C16 content), 25% reduction of phosphatidylglycerol content, no obvious growth defect.                                                                                                                                                                                                                                                                                                                                                                                                 | 16774646 | 1 | 0 |
| AT1G73360 | HDG11   | HDGL2-11                                                                                          | More branched trichomes compared with the wild type.                                                                                                                                                                                                                                                                                                                                                                                                                                                                                    | 16778018 | 1 | 1 |
| AT1G73360 | HDG11   | HDGL2-11                                                                                          | Obvious enhancement of the excess branching phenotype of the hdg11-1 trichome.                                                                                                                                                                                                                                                                                                                                                                                                                                                          | 16778018 | 1 | 1 |
| AT1G73360 | HDG11   | HDGL2-11                                                                                          | The hdg11-2 mutant has increased trichome branching.                                                                                                                                                                                                                                                                                                                                                                                                                                                                                    | 16778018 | 1 | 1 |
| AT1G17920 | HDG12   |                                                                                                   | Obvious enhancement of the excess branching phenotype of the hdg11-1 trichome.                                                                                                                                                                                                                                                                                                                                                                                                                                                          | 16778018 | 1 | 1 |
| AT2G01940 | SGR5    | IDD15                                                                                             | Reduced shoot gravitropism compared with wild-type Ler.                                                                                                                                                                                                                                                                                                                                                                                                                                                                                 | 16813575 | 1 | 1 |
| AT2G01940 | SGR5    | IDD15                                                                                             | Inflorescence stems of mutant plants showed abnormal gravitropic response, while gravitropism in hypocotyls and roots was not altered.                                                                                                                                                                                                                                                                                                                                                                                                  | 16813575 | 1 | 1 |
| AT1G33980 | UPF3    |                                                                                                   | late flowering in long day growth conditions; narrower and more jagged rosette leaves than both wild-type plants; aberrant flower formation.                                                                                                                                                                                                                                                                                                                                                                                            | 16813578 | 1 | 1 |
| AT1G19800 | ABC114  |                                                                                                   | Compared to the wild type, mutant plants were consistently smaller and slightly pale, as was observed for the tgd1-1 mutants. Chlorophyll contents (Chlorophyll per gram of fresh weight) were reduced to a similar extent in the tgd1-1 and tgd2-1 mutants. Mutant plants had aberrant accumulation of oligogalactolipids and triacylglycerols; this was consistent with a disruption of the import of ER-derived lipids into the plastid.                                                                                             | 16818883 | 3 | 1 |
| AT2G02220 | LRR-RLK |                                                                                                   | Compared to wildtype, mutant cells gradually lose their ability to form calluses as they age.                                                                                                                                                                                                                                                                                                                                                                                                                                           | 16829587 | 1 | 1 |
| AT2G02220 | LRR-RLK |                                                                                                   | Mutant calluses exhibit premature signs of senescence (browning within 3 weeks).                                                                                                                                                                                                                                                                                                                                                                                                                                                        | 16829587 | 1 | 1 |
| AT2G02220 | LRR-RLK |                                                                                                   | Mutant leaves display premature senescence four weeks after germination and are fully senesced after six weeks.                                                                                                                                                                                                                                                                                                                                                                                                                         | 16829587 | 1 | 1 |
| AT2G02220 | LRR-RLK |                                                                                                   | Treatment of hypocotyl segments of the mutant with auxin/cytokinin results in normal calluses development.                                                                                                                                                                                                                                                                                                                                                                                                                              | 16829587 | 1 | 1 |
| AT2G02220 | LRR-RLK |                                                                                                   | When grown on B5 agar, the mutant seedlings were indistinguishable from wildtype, albeit with a slight reduction in root growth. After three weeks of culture, the mutant was morphologically identical from above-ground wildtype plants.                                                                                                                                                                                                                                                                                              | 16829587 | 1 | 0 |
| AT2G02220 | LRR-RLK |                                                                                                   | Whereas wildtype callus' growth is significantly promoted by 10mM phytosulfokine (PSK), calluses of the mutant are less sensitive to PSK.                                                                                                                                                                                                                                                                                                                                                                                               | 16829587 | 1 | 0 |
| AT1G78590 | NADR3   |                                                                                                   | SALK 079342 (nadk3) is hypersensitive to oxidative stress, ABA and osmotic stress.                                                                                                                                                                                                                                                                                                                                                                                                                                                      | 16856986 | 1 | 1 |
| AT2G15290 | TIC21   | C1A5 PIC1                                                                                         | Seedling lethal when grown on soil, but produced albino leaves or even inflorescent tissues on synthetic media supplemented with sucrose.                                                                                                                                                                                                                                                                                                                                                                                               | 16891400 | 1 | 1 |
| AT2G15290 | TIC21   | C1A5 PIC1                                                                                         | The youngest part of the homozygous progeny are slightly green at the center of the seedlings.                                                                                                                                                                                                                                                                                                                                                                                                                                          | 16891400 | 1 | 1 |
| AT2G15290 | TIC21   | C1A5 PIC1                                                                                         | Albino phenotype even in the youngest part of the seedling, which often accumulates anthocyanins.                                                                                                                                                                                                                                                                                                                                                                                                                                       | 16891400 | 1 | 1 |
| AT2G15290 | TIC21   | C1A5 PIC1                                                                                         | Seedlings grown in artificial media supplemented with sucrose are able to produce a few irregularly shaped leaves, followed by an arrest in growth. The timing of growth arrest varies from one seedling to the next leading to a variety of sizes and morphologies.                                                                                                                                                                                                                                                                    | 16891400 | 1 | 1 |
| AT1G04945 |         |                                                                                                   | Albino phenotype even in the youngest part of the seedling, which often accumulates anthocyanins.                                                                                                                                                                                                                                                                                                                                                                                                                                       | 16891400 | 1 | 0 |
| AT1G04945 |         |                                                                                                   | Seedlings grown in artificial media supplemented with sucrose are able to produce a few irregularly shaped leaves, followed by an arrest in growth. The timing of growth arrest varies from one seedling to the next leading to a variety of sizes and morphologies.                                                                                                                                                                                                                                                                    | 16891400 | 1 | 0 |
| AT1G04940 | TIC20-I |                                                                                                   | Albino phenotype even in the youngest part of the seedling, which often accumulates anthocyanins.                                                                                                                                                                                                                                                                                                                                                                                                                                       | 16891400 | 1 | 0 |
| AT1G04940 | TIC20-I |                                                                                                   | Seedlings grown in artificial media supplemented with sucrose are able to produce a few irregularly shaped leaves, followed by an arrest in growth. The timing of growth arrest varies from one seedling to the next leading to a variety of sizes and morphologies.                                                                                                                                                                                                                                                                    | 16891400 | 1 | 0 |
| AT2G02950 | PKS1    |                                                                                                   | Under FRc conditions, the length mutant hypocotyls is decreased compared to that of wild-type plants. Under Rc conditions, the hypocotyl length is also decreased and the cotyledon area is larger.                                                                                                                                                                                                                                                                                                                                     | 16891401 | 1 | 1 |
| AT1G78070 |         |                                                                                                   | Under both FRc and Rc conditions, the length of mutant hypocotyls and cotyledon area are similar to that of wild type.                                                                                                                                                                                                                                                                                                                                                                                                                  | 16891401 | 1 | 0 |
| AT1G18330 | RVE7    | EPR1                                                                                              | Under both FRc and Rc conditions, the length of mutant hypocotyls and cotyledon area are similar to that of wild type.                                                                                                                                                                                                                                                                                                                                                                                                                  | 16891401 | 1 | 0 |

|           |       |                                                                                                                                                    |                                                                                                                                                                                                                                                                                                                                                                                                                                                                                                                      |          |   |   |
|-----------|-------|----------------------------------------------------------------------------------------------------------------------------------------------------|----------------------------------------------------------------------------------------------------------------------------------------------------------------------------------------------------------------------------------------------------------------------------------------------------------------------------------------------------------------------------------------------------------------------------------------------------------------------------------------------------------------------|----------|---|---|
| AT1G01060 | LHY   | LATE ELONGATED HYPOCOTYL LATE ELONGATED HYPOCOTYL 1 LHY1                                                                                           | The mutant plants are hypersensitive to both FRc and Rc light treatments in hypocotyl elongation and exhibits a small reciprocal enlargement in cotyledon area, albeit not statistically significant.                                                                                                                                                                                                                                                                                                                | 16891401 | 1 | 0 |
| AT1G60440 | PANK1 | ATCOAA ATPANK1 panToThenaTe kinase 1                                                                                                               | The mutant siliques contained a percentage of shriveled seed remnants, which manifested as gaps in the developing line of green seeds.                                                                                                                                                                                                                                                                                                                                                                               | 16897480 |   |   |
| AT1G60440 | PANK1 | ATCOAA ATPANK1 panToThenaTe kinase 1                                                                                                               | embryo lethal.                                                                                                                                                                                                                                                                                                                                                                                                                                                                                                       | 16897480 |   |   |
| AT1G59640 | BPE   | BHLH31 ENS8 ZCR32                                                                                                                                  | Larger petal size as a result of increased petal cell size.                                                                                                                                                                                                                                                                                                                                                                                                                                                          | 16902407 | 1 | 1 |
| AT1G10170 | NFXL1 | ATNFXL1 NF-X-like 1                                                                                                                                | Reduced growth (decreased biomass) when grown under conditions with salt or osmotic stress. Reduced levels of H2O2.                                                                                                                                                                                                                                                                                                                                                                                                  | 16905136 | 1 | 0 |
| AT2G02560 | CAND1 | ETA2 HVE                                                                                                                                           | Cotyledon areoles (regions of the lamina completely bordered by veins) were often incompletely closed, while in the wild type, the cotyledons contained three or four complete areoles. The reduction in vein numbers was also apparent in the first two rosette leaves, which had fewer secondary veins than the wild type. No quaternary veins and only a few tertiary veins, which ended blindly within the areoles, were present in mutant leaves, the intramarginal vein of which was occasionally interrupted. | 16943276 | 1 | 1 |
| AT2G02560 | CAND1 | ETA2 HVE                                                                                                                                           | Similar to Atcand1-1 mutant. Resistant to sirtinol and auxin, but not to gibberellins or brassinolide. Displayed developmental phenotypes similar to those of axr1, namely, short petioles, downwardly curling leaves, shorter inflorescence. More severe inflorescence phenotype were found in this mutant compared to the atcand1-1 (ems-generated) mutation. Mutant plants were completely sterile.                                                                                                               | 16943276 | 1 | 0 |
| AT1G73590 | PIN1  |                                                                                                                                                    | Altered leaf venation pattern. Compared to the wild type, vascular density of the first leaf in mutants was increased (Fig 7, in Alonso-Peral et al., 2006).                                                                                                                                                                                                                                                                                                                                                         | 16943276 | 1 | 1 |
| AT1G05470 | IPSP6 | CVP2                                                                                                                                               | cvp2-1 mutants have defective foliar vascular patterning due to a reduced recruitment of cells into vascular tissue. cvp2-1 cotyledons have an aberrant open reticulum, an increased number of free vein endings, and vascular islands. cvp2-1 leaves have abnormal secondary, tertiary, and quaternary venation patterns. IP3 levels are increased in cvp2-1 seedlings and these mutants are hypersensitive to ABA in a seed germination assay.                                                                     | 16943276 | 1 | 0 |
| AT1G04020 | BARD1 | ATBARD1 ROW1                                                                                                                                       | Sensitive to mitomycin C. Intrachromosomal homologous recombination is reduced in the mutant plants and less inducible by genotoxic stress.                                                                                                                                                                                                                                                                                                                                                                          | 16957774 | 1 | 1 |
| AT1G74710 | ICS1  |                                                                                                                                                    | In control experiments, multiplication of the bacterial <i>cor</i> mutant (in Col and Ler) at the surface of leaves was greatly reduced compared whereas it multiplied efficiently when infiltrated directly into the apoplast (and caused typical disease symptoms including necrosis and chlorosis). In the surface-inoculated mutant, the bacterial <i>cor</i> mutant multiplied efficiently.                                                                                                                     | 16959575 |   |   |
| AT1G74710 | ICS1  |                                                                                                                                                    | Stomatal closure in response to bacteria and lipopolysaccharide (LPS) is compromised in the mutant.                                                                                                                                                                                                                                                                                                                                                                                                                  | 16959575 |   |   |
| AT1G16540 | ABA3  | ABA DEFICIENT 3 ACT2 ALTERED CHLOROPLAST IMPORT 2 ATABA3 ATLOS5 LOS5 LOW OSMOTIC STRESS 5 MOLYBDENIUM COFACTOR SULFURASE SIR3 SIRTINOL RESISTANT 3 | In control experiments, multiplication of the bacterial <i>cor</i> mutant (in Col and Ler) at the surface of leaves was greatly reduced compared whereas it multiplied efficiently when infiltrated directly into the apoplast (and caused typical disease symptoms including necrosis and chlorosis). In the surface-inoculated mutant, the bacterial <i>cor</i> mutant multiplied efficiently.                                                                                                                     | 16959575 |   |   |
| AT1G16540 | ABA3  | ABA DEFICIENT 3 ACT2 ALTERED CHLOROPLAST IMPORT 2 ATABA3 ATLOS5 LOS5 LOW OSMOTIC STRESS 5 MOLYBDENIUM COFACTOR SULFURASE SIR3 SIRTINOL RESISTANT 3 | Stomata of the mutant are greatly compromised in their ability to respond to either <i>Pst</i> DC3000 or <i>Pst</i> DC3000/avrRpt2<i>, suggesting that ABA biosynthesis is required for stomatal closure in response to these bacteria.</i>                                                                                                                                                                                                                                                                          | 16959575 |   |   |
| AT1G16540 | ABA3  | ABA DEFICIENT 3 ACT2 ALTERED CHLOROPLAST IMPORT 2 ATABA3 ATLOS5 LOS5 LOW OSMOTIC STRESS 5 MOLYBDENIUM COFACTOR SULFURASE SIR3 SIRTINOL RESISTANT 3 | Stomatal closure could not be induced by the bacterial PAMP (pathogen-associated molecular pattern) molecules <i>flg2</i> (a biologically active peptide derived from flagellin) or LPS (lipopolysaccharide).                                                                                                                                                                                                                                                                                                        | 16959575 |   |   |
| AT1G05180 | AXR1  |                                                                                                                                                    | Leaf phenotypes are enhanced with respect to either single mutant, with deeply lobed margins and ectopic stipules present in the sinus of each lobe.                                                                                                                                                                                                                                                                                                                                                                 | 16971475 | 1 | 0 |
| AT1G05180 | AXR1  |                                                                                                                                                    | Ectopic stipules observed in cauline leaves of axr1 plants are not found. Leaves have an axr1-like morphology.                                                                                                                                                                                                                                                                                                                                                                                                       | 16971475 | 1 | 0 |
| AT1G73840 | ESP1  | ENHANCED SILENCING PHENOTYPE 1                                                                                                                     | Early flowering, normal stature and leaf morphology.                                                                                                                                                                                                                                                                                                                                                                                                                                                                 | 17008405 | 1 | 1 |
| AT1G73840 | ESP1  | ENHANCED SILENCING PHENOTYPE 1                                                                                                                     | Two- to three-fold fewer of the endogenous PDS mRNA than in the wild-type plants and 10- to 50-fold higher levels of PDS siRNA.                                                                                                                                                                                                                                                                                                                                                                                      | 17008405 | 1 | 1 |
| AT1G32490 | ESP3  | EMB2733 EMBRYO DEFECTIVE 2733 ENHANCED SILENCING PHENOTYPE 3                                                                                       | Reduced stature, early flowering, and altered leaf morphology.                                                                                                                                                                                                                                                                                                                                                                                                                                                       | 17008405 | 1 | 1 |
| AT1G32490 | ESP3  | EMB2733 EMBRYO DEFECTIVE 2733 ENHANCED SILENCING PHENOTYPE 3                                                                                       | Two- to three-fold fewer of the endogenous PDS mRNA than in the wild-type plants and 10- to 50-fold higher levels of PDS siRNA.                                                                                                                                                                                                                                                                                                                                                                                      | 17008405 | 1 | 0 |
| AT1G78390 | NCED9 |                                                                                                                                                    | Seed germination in the dark after far red light treatment was almost completely suppressed as in the case of wild type.                                                                                                                                                                                                                                                                                                                                                                                             | 17010113 | 1 | 1 |
| AT1G52340 | ABA2  | GIN1 IS14 SAN3 SDR1 SIS4 SRE1                                                                                                                      | Approximately 40% of mutant seeds germinate after far red/red light treatment, whereas wild type germination was suppressed almost entirely.                                                                                                                                                                                                                                                                                                                                                                         | 17010113 | 1 | 1 |
| AT1G52340 | ABA2  | GIN1 IS14 SAN3 SDR1 SIS4 SRE1                                                                                                                      | Germination of the mutant seeds after irradiation with far red light is inhibited by paclobutrazol, an inhibitor of GA biosynthesis.                                                                                                                                                                                                                                                                                                                                                                                 | 17010113 | 1 | 1 |
| AT1G52340 | ABA2  | GIN1 IS14 SAN3 SDR1 SIS4 SRE1                                                                                                                      | Several GA biosynthesis genes are upregulated in the mutant compared to wild type during seed development.                                                                                                                                                                                                                                                                                                                                                                                                           | 17010113 | 1 | 1 |
| AT1G65470 | FAS1  | FASCIATA 1 FUGU 2 FUGU2 NFB2 NUCLEOSOME                                                                                                            | smaller than wild type and develop fasciation.                                                                                                                                                                                                                                                                                                                                                                                                                                                                       | 17021044 | 1 | 0 |
| AT1G03310 | ISA2  | DBE1                                                                                                                                               | Strong reduction in maltose accumulation compared to the be2-1 be3-2 double mutant.                                                                                                                                                                                                                                                                                                                                                                                                                                  | 17028209 | 1 | 1 |
| AT1G03310 | ISA2  | DBE1                                                                                                                                               | Displays the same profile of polymerization (DP) as the corresponding be2 or be3 mutant.                                                                                                                                                                                                                                                                                                                                                                                                                             | 17028209 | 1 | 1 |
| AT1G03310 | ISA2  | DBE1                                                                                                                                               | Increased starch phosphorylase activity compared to wild type.                                                                                                                                                                                                                                                                                                                                                                                                                                                       | 17028209 | 1 | 1 |
| AT1G03310 | ISA2  | DBE1                                                                                                                                               | No starch branching enzyme activity detected.                                                                                                                                                                                                                                                                                                                                                                                                                                                                        | 17028209 | 1 | 1 |
| AT1G03310 | ISA2  | DBE1                                                                                                                                               | DP 6-7 and DP 5-9 chains are slightly decreased, whereas DP 10-16 chains are slightly increased (DP, degree of polymerization).                                                                                                                                                                                                                                                                                                                                                                                      | 17028209 | 1 | 1 |
| AT1G03310 | ISA2  | DBE1                                                                                                                                               | Starch granules are slightly larger than those of wild type.                                                                                                                                                                                                                                                                                                                                                                                                                                                         | 17028209 | 1 | 1 |
| AT1G03310 | ISA2  | DBE1                                                                                                                                               | Absence of starch and accumulation of very high levels of water-soluble glucans.                                                                                                                                                                                                                                                                                                                                                                                                                                     | 17028209 | 1 | 1 |
| AT1G03310 | ISA2  | DBE1                                                                                                                                               | Contains 90% of <math>\alpha</math>-maltose and 10% of <math>\beta</math>-maltose.                                                                                                                                                                                                                                                                                                                                                                                                                                   | 17028209 | 1 | 0 |
| AT1G03310 | ISA2  | DBE1                                                                                                                                               | Low growth and flowering rates.                                                                                                                                                                                                                                                                                                                                                                                                                                                                                      | 17028209 | 1 | 1 |
| AT1G03310 | ISA2  | DBE1                                                                                                                                               | Pale colour.                                                                                                                                                                                                                                                                                                                                                                                                                                                                                                         | 17028209 | 1 | 0 |
| AT1G03310 | ISA2  | DBE1                                                                                                                                               | Reduced size of the mature plant. Thirty days after seed germination, the fresh weight of this mutant is one-fifth of that of wild type.                                                                                                                                                                                                                                                                                                                                                                             | 17028209 | 1 | 0 |
| AT1G03310 | ISA2  | DBE1                                                                                                                                               | The levels of sucrose, fructose, glucose 6-phosphate and glucose 1-phosphate are not significantly deviating from those of wild type or the single mutants.                                                                                                                                                                                                                                                                                                                                                          | 17028209 | 1 | 0 |
| AT1G03310 | ISA2  | DBE1                                                                                                                                               | The maltose accumulates mostly in the cytosol (~80%).                                                                                                                                                                                                                                                                                                                                                                                                                                                                | 17028209 | 1 | 0 |
| AT1G03310 | ISA2  | DBE1                                                                                                                                               | The mutant is still able to produce siliques and viable seeds.                                                                                                                                                                                                                                                                                                                                                                                                                                                       | 17028209 | 1 | 0 |
| AT1G03310 | ISA2  | DBE1                                                                                                                                               | Water-soluble glycans are composed of very short malto-oligosaccharides made of 80% maltose, 14% maltotriose and 6% glucose.                                                                                                                                                                                                                                                                                                                                                                                         | 17028209 | 1 | 0 |
| AT1G03310 | ISA2  | DBE1                                                                                                                                               | Wilting of the inflorescence.                                                                                                                                                                                                                                                                                                                                                                                                                                                                                        | 17028209 | 1 | 1 |
| AT1G53330 |       |                                                                                                                                                    | 30-40% T3 seeds are embryo lethal, the rest had delayed germination. Among the germinated plants, they displayed a range of phenotypic expression: 1) seedling lethal, 2) normal cotyledons later became elongated and fragile, slightly narrower and curved rosette leaves, reduced shoot apical dominance, elongated internode, shorter primary roots and long lateral roots, shorter siliques, 3) very subtle changes                                                                                             | 17028967 |   |   |
| AT1G52340 | ABA2  | GIN1 IS14 SAN3 SDR1 SIS4 SRE1                                                                                                                      | Mutant showed a similar sensitivity to 25 mM trehalose as wild type (inhibition of root growth).                                                                                                                                                                                                                                                                                                                                                                                                                     | 17031512 | 1 | 1 |
| AT1G71100 | RP11  | RSW10                                                                                                                                              | After 4 days at 31°C, root hairs emerge in the region that would formerly have been the meristem.                                                                                                                                                                                                                                                                                                                                                                                                                    | 17059404 | 1 | 1 |
| AT1G71100 | RP11  | RSW10                                                                                                                                              | Bulking of epidermal cells is observed in roots but not in the hypocotyl.                                                                                                                                                                                                                                                                                                                                                                                                                                            | 17059404 | 1 | 1 |
| AT1G71100 | RP11  | RSW10                                                                                                                                              | Flowers, leaves and trichomes are normal.                                                                                                                                                                                                                                                                                                                                                                                                                                                                            | 17059404 | 1 | 0 |
| AT1G71100 | RP11  | RSW10                                                                                                                                              | Hypocotyl phenotype is modest in mature, aerial parts of the plant.                                                                                                                                                                                                                                                                                                                                                                                                                                                  | 17059404 | 1 | 1 |
| AT1G71100 | RP11  | RSW10                                                                                                                                              | In mutant seedlings, hypocotyl swelling is constitutively observed both at 21°C and 31°C (although slightly more important in the latter case).                                                                                                                                                                                                                                                                                                                                                                      | 17059404 | 1 | 1 |
| AT1G71100 | RP11  | RSW10                                                                                                                                              | Phenotype pronounced in seedlings, in particular after the transfer of plants initially grown at 21°C to the elevated temperature of 31°C, but is not obvious in mature plants.                                                                                                                                                                                                                                                                                                                                      | 17059404 | 1 | 1 |
| AT1G71100 | RP11  | RSW10                                                                                                                                              | Reduction in cellulosic glucose. The non-cellulosic matrix polysaccharides showed a reduction in fucose, increase in arabinose and to a lesser extent xylose. No significant changes in the levels of rhamnose, mannose and galactose are observed.                                                                                                                                                                                                                                                                  | 17059404 | 1 | 0 |
| AT1G71100 | RP11  | RSW10                                                                                                                                              | Roots of the mutants are similar to those of wild type when grown at 21°C. After transfer to 31°C, their roots progressively increase in diameter between days 5 and 9. Extended treatment at this temperature leads to the drastic reduction in root elongation and of the elongation zone itself.                                                                                                                                                                                                                  | 17059404 | 1 | 1 |
| AT1G71100 | RP11  | RSW10                                                                                                                                              | Significant reduction in cellulose.                                                                                                                                                                                                                                                                                                                                                                                                                                                                                  | 17059404 | 1 | 1 |

|           |        |                                                                              |                                                                                                                                                                                                                                                                                                                                                                                                                  |          |   |   |
|-----------|--------|------------------------------------------------------------------------------|------------------------------------------------------------------------------------------------------------------------------------------------------------------------------------------------------------------------------------------------------------------------------------------------------------------------------------------------------------------------------------------------------------------|----------|---|---|
| ATIG71100 | RPI1   | RSW10                                                                        | Stem regrowth is reduced.                                                                                                                                                                                                                                                                                                                                                                                        | 17059404 | 1 | 1 |
| ATIG68460 | IPT1   |                                                                              | Decreased levels of isopentenyladenosine riboside (iPR) and isopentenyladenosine monophosphate (iPRMP) compared to wild type.                                                                                                                                                                                                                                                                                    | 17062755 | 1 | 0 |
| ATIG68460 | IPT1   |                                                                              | Increased levels of cis-zeatin riboside (cZR) and cis-zeatin riboside monophosphate (cZRMP) compared to wild type.                                                                                                                                                                                                                                                                                               | 17062755 | 1 | 0 |
| ATIG68460 | IPT1   |                                                                              | Decreases in free-base iP and tZ are moderate compared to those of the riboside and ribotide forms.                                                                                                                                                                                                                                                                                                              | 17062755 | 1 | 0 |
| ATIG68460 | IPT1   |                                                                              | External application of (<i>trans</i>)-zeatin partially rescues the growth of aerial parts of the mutant, and reduced its lateral root elongation.                                                                                                                                                                                                                                                               | 17062755 | 1 | 0 |
| ATIG68460 | IPT1   |                                                                              | Fewer rosette leaves than wild type indicating a prolonged plastochron.                                                                                                                                                                                                                                                                                                                                          | 17062755 | 1 | 1 |
| ATIG68460 | IPT1   |                                                                              | Flowering time is delayed when grown on vermiculite but not on nutrient agar.                                                                                                                                                                                                                                                                                                                                    | 17062755 | 1 | 0 |
| ATIG68460 | IPT1   |                                                                              | Indistinguishable from wild type in the early stages of development. Phenotypic differences become evident as the plant age.                                                                                                                                                                                                                                                                                     | 17062755 | 1 | 1 |
| ATIG68460 | IPT1   |                                                                              | Levels of iPRMP, iPR, tZRMP, tZR, tZ-7-glucoside, tZ-9-glucoside and tZ-0-glucoside are all reduced to less than 20% of those of wild type.                                                                                                                                                                                                                                                                      | 17062755 | 1 | 0 |
| ATIG68460 | IPT1   |                                                                              | Reduced shoot apical meristem size and thin inflorescence stems.                                                                                                                                                                                                                                                                                                                                                 | 17062755 | 1 | 1 |
| ATIG68460 | IPT1   |                                                                              | Relative to wild type, both the number of lateral roots (longer than 1cm) and the total length of the lateral roots are increased.                                                                                                                                                                                                                                                                               | 17062755 | 1 | 1 |
| ATIG68460 | IPT1   |                                                                              | Short and thin aerial parts.                                                                                                                                                                                                                                                                                                                                                                                     | 17062755 | 1 | 1 |
| ATIG68460 | IPT1   |                                                                              | Some seeds are aborted but surviving ones are larger than those of wild type.                                                                                                                                                                                                                                                                                                                                    | 17062755 | 1 | 1 |
| ATIG68460 | IPT1   |                                                                              | Thin, small plants.                                                                                                                                                                                                                                                                                                                                                                                              | 17062755 | 1 | 1 |
| ATIG25410 | IPT6   |                                                                              | Fewer rosette leaves than wild type indicating a prolonged plastochron.                                                                                                                                                                                                                                                                                                                                          | 17062755 | 1 | 1 |
| ATIG25410 | IPT6   |                                                                              | Flowering time is delayed when grown on vermiculite but not on nutrient agar.                                                                                                                                                                                                                                                                                                                                    | 17062755 | 1 | 0 |
| ATIG25410 | IPT6   |                                                                              | Indistinguishable from wild type in the early stages of development. Phenotypic differences become evident as the plant age.                                                                                                                                                                                                                                                                                     | 17062755 | 1 | 0 |
| ATIG25410 | IPT6   |                                                                              | Reduced shoot apical meristem size and thin inflorescence stems.                                                                                                                                                                                                                                                                                                                                                 | 17062755 | 1 | 0 |
| ATIG25410 | IPT6   |                                                                              | Short and thin aerial parts.                                                                                                                                                                                                                                                                                                                                                                                     | 17062755 | 1 | 0 |
| ATIG25410 | IPT6   |                                                                              | Some seeds are aborted but surviving ones are larger than those of wild type.                                                                                                                                                                                                                                                                                                                                    | 17062755 | 1 | 0 |
| ATIG25410 | IPT6   |                                                                              | Thin, small plants.                                                                                                                                                                                                                                                                                                                                                                                              | 17062755 | 1 | 0 |
| ATIG23400 |        |                                                                              | homozygous are embryo lethal, arrested at the globular stage and do not undergo transition to heart stage                                                                                                                                                                                                                                                                                                        | 17071648 | 1 | 0 |
| ATIG23400 |        |                                                                              | small, pale green                                                                                                                                                                                                                                                                                                                                                                                                | 17071648 | 1 | 0 |
| ATIG30970 | SUP4   | suppressor of FRIGIDA4                                                       | Suppress the FRI late flowering phenotype. Reduced H3K4 trimethylation at FLC locus.                                                                                                                                                                                                                                                                                                                             | 17079264 | 1 | 1 |
| ATIG76030 | VHA-B1 | AT57                                                                         | Insensitive to high-glucose repression of cotyledon expansion, chlorophyll accumulation, true-leaf development and root elongation. The response is specific to glucose but not to osmotic changes.                                                                                                                                                                                                              | 17081979 |   |   |
| ATIG09110 |        |                                                                              | Insensitive to high-glucose repression of cotyledon expansion, chlorophyll accumulation, true-leaf development and root elongation. The response is specific to glucose but not to osmotic changes.                                                                                                                                                                                                              | 17081979 |   |   |
| ATIG09100 | RPT5B  | TBP1                                                                         | Insensitive to high-glucose repression of cotyledon expansion, chlorophyll accumulation, true-leaf development and root elongation. The response is specific to glucose but not to osmotic changes.                                                                                                                                                                                                              | 17081979 |   |   |
| AT2G02480 |        |                                                                              | The mutant showed cluster-like trichomes lacking additional branches.                                                                                                                                                                                                                                                                                                                                            | 17090720 | 1 | 0 |
| ATIG73730 | EIL3   | ATEIL3 ATSLIM ETHYLENE-INSENSITIVE3-like 3 SLIM1 SULFUR LIMITATION 1         | reduced plant growth under sulfate starvation condition. reduced sulfate uptake.                                                                                                                                                                                                                                                                                                                                 | 17114350 | 1 | 1 |
| ATIG15820 |        |                                                                              | No change in the chlorophyll a/b ratio and no change in the content of various xanthophylls compared to wild type. Moreover, there was no difference in the extent light-induced depoxidation of the xanthophyll cycle pigments.                                                                                                                                                                                 | 17114352 | 1 | 0 |
| ATIG15820 |        |                                                                              | Reduction in growth rate of the mutant plants compared with the wild type; the rate of increase in rosette diameter was slower, the average time for flowering increased by several days, and the fresh weight was lower.                                                                                                                                                                                        | 17114352 | 1 | 1 |
| ATIG15820 |        |                                                                              | The kinetics of NPQ formation were altered in the mutant plants compared with the wild type; in the latter, the rapid rise in NPQ was followed by a slower phase, whereas in the mutant, the slower phase was almost completely absent. The reduction in qE in the CP24-depleted plants was observed at all light intensities, with a maximum reduction of ~60% in the mutants.                                  | 17114352 | 1 | 0 |
| ATIG15820 |        |                                                                              | When the FR light is turned off in State I, the induction of State II occurs rapidly and is complete within 3 min. By contrast, in the wild type, this takes at least 10 min.                                                                                                                                                                                                                                    | 17114352 | 1 | 0 |
| ATIG74560 | NRP1   | NFA6                                                                         | mutants did not show any phenotype under in vitro culture and greenhouse growth conditions.                                                                                                                                                                                                                                                                                                                      | 17122067 | 1 | 0 |
| ATIG74560 | NRP1   | NFA6                                                                         | Double mutant plants showed a short-root phenotype: roots grew like the wild-type roots until 6 d after germination (DAG). However, after 7 DAG, the elongation of the double mutant roots was dramatically reduced compared with the wild-type roots. The aerial organs (leaves, rosettes, inflorescences, flowers, fruits, and embryos) developed normally in the double mutant plants.                        | 17122067 | 1 | 0 |
| ATIG18800 | NRP2   | NFA5                                                                         | mutants did not show any phenotype under in vitro culture and greenhouse growth conditions.                                                                                                                                                                                                                                                                                                                      | 17122067 | 1 | 1 |
| ATIG18800 | NRP2   | NFA5                                                                         | Double mutant plants showed a short-root phenotype: roots grew like the wild-type roots until 6 d after germination (DAG). However, after 7 DAG, the elongation of the double mutant roots was dramatically reduced compared with the wild-type roots. The aerial organs (leaves, rosettes, inflorescences, flowers, fruits, and embryos) developed normally in the double mutant plants.                        | 17122067 | 1 | 1 |
| ATIG76420 | NAC031 | CUC3 NAC368                                                                  | High frequency production of cup-shaped cotyledons in seedlings, most form a primary shoot.                                                                                                                                                                                                                                                                                                                      | 17122068 | 1 | 1 |
| ATIG76420 | NAC031 | CUC3 NAC368                                                                  | Production of the first pair of leaf primordia is significantly delayed compared to the wild type. This likely reflects a defect in embryonic shoot meristem initiation.                                                                                                                                                                                                                                         | 17122068 | 1 | 1 |
| ATIG76420 | NAC031 | CUC3 NAC368                                                                  | High frequency of production of cup-shaped cotyledons in seedlings, more than half fail to produce primary shoots.                                                                                                                                                                                                                                                                                               | 17122068 | 1 | 1 |
| ATIG76420 | NAC031 | CUC3 NAC368                                                                  | 12% of seedlings have cotyledons partially fused along one side (heart-shaped cotyledons).                                                                                                                                                                                                                                                                                                                       | 17122068 | 1 | 1 |
| ATIG65480 | FT     | FLOWERING LOCUS T REDUCED STEM BRANCHING 8 RSB8                              | Increased delay in flowering time compared to both parental single mutants.                                                                                                                                                                                                                                                                                                                                      | 17138694 | 1 | 0 |
| ATIG30970 | SUP4   | suppressor of FRIGIDA4                                                       | Similar delays in flowering in short days and similar acceleration of flowering by vernalization as Col.                                                                                                                                                                                                                                                                                                         | 17138694 | 1 | 1 |
| ATIG30970 | SUP4   | suppressor of FRIGIDA4                                                       | Early flowering almost identical to Col, which is a fri null, and did not display any other morphological alterations.                                                                                                                                                                                                                                                                                           | 17138694 | 1 | 1 |
| ATIG30970 | SUP4   | suppressor of FRIGIDA4                                                       | Slight increase in delay in flowering under LD conditions compared to co-1 single mutant.                                                                                                                                                                                                                                                                                                                        | 17138694 | 1 | 1 |
| ATIG30970 | SUP4   | suppressor of FRIGIDA4                                                       | Shorter delay in flowering time under LD conditions compared to single mutant fca-9.                                                                                                                                                                                                                                                                                                                             | 17138694 | 1 | 1 |
| ATIG30970 | SUP4   | suppressor of FRIGIDA4                                                       | Flowering time similar to that of the flc-3 single mutant in both LD and SD conditions.                                                                                                                                                                                                                                                                                                                          | 17138694 | 1 | 1 |
| ATIG30970 | SUP4   | suppressor of FRIGIDA4                                                       | Increased delay in flowering time compared to both parental single mutants.                                                                                                                                                                                                                                                                                                                                      | 17138694 | 1 | 1 |
| ATIG30970 | SUP4   | suppressor of FRIGIDA4                                                       | Intermediate delay in flowering time compared to both single mutants.                                                                                                                                                                                                                                                                                                                                            | 17138694 | 1 | 1 |
| ATIG30970 | SUP4   | suppressor of FRIGIDA4                                                       | Delay in flowering intermediate between that observed in the two parental single mutants.                                                                                                                                                                                                                                                                                                                        | 17138694 | 1 | 1 |
| ATIG30970 | SUP4   | suppressor of FRIGIDA4                                                       | Slight increase in delay in flowering under LD conditions compared to socl-2 single mutant.                                                                                                                                                                                                                                                                                                                      | 17138694 | 1 | 1 |
| ATIG49820 | MTK    |                                                                              | etiolated seedlings of both wild type and mtk mutants have very low emission of ethylene. The eto3 mutant on the other hand has much higher emission of ethylene. The mtk/eto3 double mutant has an intermediate level of ethylene emission. Since mtk is involved in methionine recycle, the double mutant phenotype indicated that methionine recycle is required to sustain high rates of ethylene synthesis. | 17144895 | 1 | 1 |
| ATIG79000 | HAC1   | ARABIDOPSIS THALIANA P300 ATHAC1 ATHPCAT2 P300 PCAT2 YUP8H12R.38 YUP8H12R.38 | Late flowering in long day (16 h light/8 h dark) as well as short day (8 h light/16 h dark).                                                                                                                                                                                                                                                                                                                     | 17144897 | 1 | 1 |
| ATIG20840 | MSSP1  | MT1                                                                          | No variation in sucrose content of leaves placed under both normal temperature or cold treatment (24h) compared to wild type leaves.                                                                                                                                                                                                                                                                             | 17158605 | 1 | 1 |
| ATIG20840 | MSSP1  | MT1                                                                          | Slight reduction (~30%) of glucose and fructose contents in leaves, whereas sucrose content is similar to that of wild type under normal growth conditions.                                                                                                                                                                                                                                                      | 17158605 | 1 | 0 |
| ATIG20840 | MSSP1  | MT1                                                                          | The vacuoles of this mutant exhibit a substantially reduced capacity to import glucose.                                                                                                                                                                                                                                                                                                                          | 17158605 | 1 | 1 |
| ATIG20840 | MSSP1  | MT1                                                                          | Although no variation in sucrose content of leaves placed under normal temperature conditions compared to wild type leaves, a substantial decrease in sucrose content was observed when the plants were placed under cold treatment (24h).                                                                                                                                                                       | 17158605 | 1 | 0 |
| ATIG20840 | MSSP1  | MT1                                                                          | Under cold treatment (24h), the decrease in glucose and fructose content in leaves is more drastically reduced compared to that of wild type and even that of the mt1 single mutants.                                                                                                                                                                                                                            | 17158605 | 1 | 1 |

|           |              |                                                                                                                                                   |                                                                                                                                                                                                                                                                                                                                                                                                                                                                                                                                                                                                                                                                                                                                                                                  |          |   |   |
|-----------|--------------|---------------------------------------------------------------------------------------------------------------------------------------------------|----------------------------------------------------------------------------------------------------------------------------------------------------------------------------------------------------------------------------------------------------------------------------------------------------------------------------------------------------------------------------------------------------------------------------------------------------------------------------------------------------------------------------------------------------------------------------------------------------------------------------------------------------------------------------------------------------------------------------------------------------------------------------------|----------|---|---|
| AT1G20840 | MSSP1        | MT1                                                                                                                                               | Under normal growth temperature conditions, the double mutant leaves' content in glucose and fructose is slightly reduced (~30%) in a similar fashion to that observed with the <i>tmt1</i> single mutants.                                                                                                                                                                                                                                                                                                                                                                                                                                                                                                                                                                      | 17158605 | 1 | 1 |
| AT1G20840 | MSSP1        | MT1                                                                                                                                               | Under normal temperature conditions, a substantial reduction in glucose and fructose contents in leaves is observed compared to wild type, and even the single <i>tmt1</i> and double <i>tmt1/tmt2</i> mutants.                                                                                                                                                                                                                                                                                                                                                                                                                                                                                                                                                                  | 17158605 | 1 | 1 |
| AT1G64280 | NPR1         | NIM1 SAI1                                                                                                                                         | dwarf. Increased salicylic acid level.                                                                                                                                                                                                                                                                                                                                                                                                                                                                                                                                                                                                                                                                                                                                           | 17163880 | 1 | 1 |
| AT1G08630 | THA1         | Threonine aldolase 1                                                                                                                              | has a large increase of seed threonine content and a small decrease of most other seed amino acids. glycine content is significantly lower in seedlings.                                                                                                                                                                                                                                                                                                                                                                                                                                                                                                                                                                                                                         | 17172352 | 1 | 1 |
| AT1G80840 | WRKY40       |                                                                                                                                                   | Mutant is almost fully resistant to the virulent powdery mildew (<i>Golovinomyces orontii</i>).                                                                                                                                                                                                                                                                                                                                                                                                                                                                                                                                                                                                                                                                                  | 17185563 | 1 | 0 |
| AT1G80840 | WRKY40       |                                                                                                                                                   | Susceptibility to the virulent powdery mildew (<i>Golovinomyces orontii</i>) remains unchanged compared to wild type.                                                                                                                                                                                                                                                                                                                                                                                                                                                                                                                                                                                                                                                            | 17185563 | 1 | 1 |
| AT1G18500 | IPMS1        | MAML-4                                                                                                                                            | IPMS1 mutants grew somewhat slower and had undulated leaves that tended to be slightly chlorotic. Showed an increase in the content of the aliphatic amino acid Val.                                                                                                                                                                                                                                                                                                                                                                                                                                                                                                                                                                                                             | 17189332 | 1 | 0 |
| AT1G47720 | OSB1         |                                                                                                                                                   | Retarded root growth, variegated and distorted leaves, distorted flowers, partial sterile, and unviable seeds. Increased number but decreased size of mitochondria.                                                                                                                                                                                                                                                                                                                                                                                                                                                                                                                                                                                                              | 17189341 | 1 | 1 |
| AT2G01570 | RGA          | GRS RGA1                                                                                                                                          | Partial suppression of the <i>gid1a-1 gid1b-1 gid1c-1</i> triple mutant phenotype.                                                                                                                                                                                                                                                                                                                                                                                                                                                                                                                                                                                                                                                                                               | 17194763 | 1 | 1 |
| AT1G02970 | WEE1         |                                                                                                                                                   | significant decreased root elongation rates, densely clustered hairs at the root tip and outgrowth of lateral roots                                                                                                                                                                                                                                                                                                                                                                                                                                                                                                                                                                                                                                                              | 17209125 | 1 | 1 |
| AT1G68725 | AGP19        |                                                                                                                                                   | Both the size and number of the epidermal cells were found to be decreased in the mutant. However, stomata cells appeared normal in terms of morphology and fraction of total epidermal cells.                                                                                                                                                                                                                                                                                                                                                                                                                                                                                                                                                                                   | 17217456 | 1 | 1 |
| AT1G68725 | AGP19        |                                                                                                                                                   | Leaves, stems and sepals were lighter green than WT plants throughout the life cycle. Pigment content analyses demonstrated that mutant rosette leaves contained less chlorophyll and anthocyanin compared to WT.                                                                                                                                                                                                                                                                                                                                                                                                                                                                                                                                                                | 17217456 | 1 | 1 |
| AT1G68725 | AGP19        |                                                                                                                                                   | Mutant had fewer rosette leaves compared to WT plants at the same age. Moreover, mutant rosette leaves were smaller and more round and had shorter petioles than WT.                                                                                                                                                                                                                                                                                                                                                                                                                                                                                                                                                                                                             | 17217456 | 1 | 1 |
| AT1G68725 | AGP19        |                                                                                                                                                   | Mutant hypocotyls were 75% of the length of WT hypocotyls when grown under long-day conditions, which corresponded to a reduction in hypocotyl cell length but not cell number. However, hypocotyl length was not compromised when mutant seedlings were grown in the dark.                                                                                                                                                                                                                                                                                                                                                                                                                                                                                                      | 17217456 | 1 | 1 |
| AT1G68725 | AGP19        |                                                                                                                                                   | The mutant had shorter, more slender inflorescence stems with fewer axillary branches and side bolts. Mutant produced fewer flowers than WT and had fewer and shorter siliques, fewer seeds per silique and a higher percentage of sterile siliques, resulting in less seed production. More than half of the mutant flowers were fertile, and although they were smaller than WT flowers, they opened normally and had normal arrangements and numbers of floral organs. Some sterile flowers were open, while others remained closed. One reason for sterility was the failure of the stamens to elongate beyond the pistil at floral stage 14, whereas, in WT, the stamens were longer than the pistil and brushed against the stigma to allow pollination and fertilization. | 17217456 | 1 | 1 |
| AT1G68725 | AGP19        |                                                                                                                                                   | Whereas, as plants matured, WT rosette leaves curled down, mutant leaves remained flat.                                                                                                                                                                                                                                                                                                                                                                                                                                                                                                                                                                                                                                                                                          | 17217456 | 1 | 1 |
| AT1G16540 | ABA3         | ABA DEFICIENT 3 AC12 ALTERED CHLOROPLAST IMPORT 2 ATABA3 ATLOS5 LOSS LOW OSMOTIC STRESS 5 MOLYBDENUM COFACTOR SULFURASE SIR3 SIRTINOL RESISTANT 3 | Double mutants were indistinguishable from <i>bps1</i> single mutants.                                                                                                                                                                                                                                                                                                                                                                                                                                                                                                                                                                                                                                                                                                           | 17217459 | 1 | 1 |
| AT1G01550 | BPS1         |                                                                                                                                                   | Growth of <i>bps1-2</i> mutants on CPTA-supplemented medium resulted in partial rescue of both leaf and root defects. <i>bps1-2</i> mutants grown on control growth medium have small radicalized leaves with very little vascular tissue, and very short misshapen knotted-looking roots. By contrast, <i>bps1-2</i> mutants grown on CPTA-supplemented medium produced larger flattened leaves that contained primary and secondary veins, and smooth elongated roots.                                                                                                                                                                                                                                                                                                         | 17217459 | 1 | 1 |
| AT1G01550 | BPS1         |                                                                                                                                                   | Under high light conditions (approximately 200 &mu;E.m <sup>-2</sup> .sec <sup>-1</sup> ), CPTA-treated seedlings were completely photobleached and mutants showed rescue of both leaf and root development. Under moderate (approximately 100 &mu;E.m <sup>-2</sup> .sec <sup>-1</sup> ) and low (30 &mu;E.m <sup>-2</sup> .sec <sup>-1</sup> ) light intensities, seedlings are incompletely photobleached, but leaf and root development continue to show partial rescue.                                                                                                                                                                                                                                                                                                     | 17217459 | 1 | 1 |
| AT1G01550 | BPS1         |                                                                                                                                                   | In double mutant seedlings grown on CPTA, a partial rescue of the <i>bps1</i> phenotype was observed.                                                                                                                                                                                                                                                                                                                                                                                                                                                                                                                                                                                                                                                                            | 17217459 | 1 | 1 |
| AT1G66340 | ETR1         |                                                                                                                                                   | In blue light, the mutant has a shorter hypocotyl than in wild type, but shows a clear sensitivity to cytokinins.                                                                                                                                                                                                                                                                                                                                                                                                                                                                                                                                                                                                                                                                | 17217468 | 1 | 1 |
| AT1G66340 | ETR1         |                                                                                                                                                   | In darkness, the mutant is resistant to cytokinins (only small decrease in hypocotyl length).                                                                                                                                                                                                                                                                                                                                                                                                                                                                                                                                                                                                                                                                                    | 17217468 | 1 | 1 |
| AT1G04400 | CRY2         | PHH1 SEL20                                                                                                                                        | In contrast to wild type, blue light does not inhibit hypocotyl elongation in the double mutant.                                                                                                                                                                                                                                                                                                                                                                                                                                                                                                                                                                                                                                                                                 | 17217468 | 1 | 1 |
| AT1G04400 | CRY2         | PHH1 SEL20                                                                                                                                        | Unlike wild type, mutant seedlings in higher light conditions (12 &mu;mol.m <sup>-2</sup> .sec <sup>-1</sup> ) respond to increasing concentrations of benzylaminopurine (BAP). At lower light intensities or in darkness, cytokinins caused identical growth inhibition in both wild-type and double mutant seedlings.                                                                                                                                                                                                                                                                                                                                                                                                                                                          | 17217468 | 1 | 1 |
| AT1G35580 | CIN1         | A alkaline cytosolic inverterase 1 N-InyG neutral inverterase G                                                                                   | Concentration of sucrose in the mutant roots are lower than in wild type. The concentration of (<i>myo</i>)-inositol is increased, as are those of glucose and fructose.                                                                                                                                                                                                                                                                                                                                                                                                                                                                                                                                                                                                         | 17220200 | 1 | 1 |
| AT1G35580 | CIN1         | A alkaline cytosolic inverterase 1 N-InyG neutral inverterase G                                                                                   | Light green leaves.                                                                                                                                                                                                                                                                                                                                                                                                                                                                                                                                                                                                                                                                                                                                                              | 17220200 | 1 | 1 |
| AT1G35580 | CIN1         | A alkaline cytosolic inverterase 1 N-InyG neutral inverterase G                                                                                   | Seedlings are more tolerant to high concentrations of glucose and sucrose compared to wild-type seedlings.                                                                                                                                                                                                                                                                                                                                                                                                                                                                                                                                                                                                                                                                       | 17220200 | 1 | 1 |
| AT1G35580 | CIN1         | A alkaline cytosolic inverterase 1 N-InyG neutral inverterase G                                                                                   | Shortened roots.                                                                                                                                                                                                                                                                                                                                                                                                                                                                                                                                                                                                                                                                                                                                                                 | 17220200 | 1 | 1 |
| AT1G34120 | IP5P1        | AT5P1 AT5PTASE1 AT1P5P1                                                                                                                           | Increased length of hypocotyls in dark grown seedlings. Seeds that have been stratified at 4C for 3 days germinate faster. Increased sensitivity to ABA.                                                                                                                                                                                                                                                                                                                                                                                                                                                                                                                                                                                                                         | 17237190 | 3 | 3 |
| AT1G32770 | NAC012       | NST3 SND1                                                                                                                                         | Under short-day conditions, the <i>nst1-1 nst3-1</i> plants were no longer able to remain upright when they reached >15cm height neither lignin nor cellulose, which constitute secondary walls, was produced in inflorescence stems of <i>nst1-1 nst3-1</i> plants,                                                                                                                                                                                                                                                                                                                                                                                                                                                                                                             | 17237351 | 3 | 2 |
| AT1G21760 | FBP7         | ATFBP7 F-BOX PROTEIN 7 F-box protein 7                                                                                                            | Although the yeast homolog of AtFBP7 is reported to bind to eEF-2, the steady state levels of eEF-2 are not altered in <i>fbp7</i> mutants under normal temperature conditions, or in response to heat or cold stress.                                                                                                                                                                                                                                                                                                                                                                                                                                                                                                                                                           | 17240087 |   |   |
| AT1G66050 | ORTH5        | VIM2                                                                                                                                              | No centromere repeat hypomethylation phenotype.                                                                                                                                                                                                                                                                                                                                                                                                                                                                                                                                                                                                                                                                                                                                  | 17242155 | 1 | 0 |
| AT1G57820 | ORTH2        | VIM1                                                                                                                                              | Increased HpaII cleavage of the 180-bp centromere repeats. This reflects hypomethylation of the centromere. Centromere repeats in interphase nuclei are decondensed relative to wild type.                                                                                                                                                                                                                                                                                                                                                                                                                                                                                                                                                                                       | 17242155 | 1 | 0 |
| AT1G03980 | PCS2         | ATPCS2 phytochelatin synthase 2                                                                                                                   | Exposure of seedlings to 50 &#956;M Cd <sup>2+</sup> for 2 days does not induce phytochelatin biosynthesis.                                                                                                                                                                                                                                                                                                                                                                                                                                                                                                                                                                                                                                                                      | 17253989 | 1 | 1 |
| AT1G03980 | PCS2         | ATPCS2 phytochelatin synthase 2                                                                                                                   | Exposure of seedlings to 50 &#956;M Cd <sup>2+</sup> for 2 days does phytochelatin biosynthesis as it does in wild type.                                                                                                                                                                                                                                                                                                                                                                                                                                                                                                                                                                                                                                                         | 17253989 | 1 | 1 |
| AT1G64670 | BDG1         | BODYGUARD1 CED1                                                                                                                                   | Cuticular defects. Resistant to <i>Botrytis cinerea</i> .                                                                                                                                                                                                                                                                                                                                                                                                                                                                                                                                                                                                                                                                                                                        | 17257167 | 2 | 1 |
| AT1G73370 | SUS6         | ATSUS6 sucrose synthase 6                                                                                                                         | The amounts of glucose, fructose, sucrose, cellulose (roots) and starch in the mutant were not statistically significantly different from those of the equivalent wild-type lines grown under the same conditions at the same time.                                                                                                                                                                                                                                                                                                                                                                                                                                                                                                                                              | 17257168 | 1 | 1 |
| AT1G73370 | SUS6         | ATSUS6 sucrose synthase 6                                                                                                                         | When grown in soil or hydroponically, the double mutant line was not obviously different from wild-type controls.                                                                                                                                                                                                                                                                                                                                                                                                                                                                                                                                                                                                                                                                | 17257168 | 1 | 1 |
| AT1G14660 | NHX8         | ATNHX8 H <sup>+</sup> exchanger 8 Na <sup>+</sup> SODIUM HYDROGEN EXCHANGER 8                                                                     | Li <sup>+</sup> hypersensitive. Under low Li <sup>+</sup> concentrations, germination of mutant seeds and elongation of roots were significantly reduced.                                                                                                                                                                                                                                                                                                                                                                                                                                                                                                                                                                                                                        | 17270011 | 2 | 2 |
| AT1G69190 | CyTHPPK/DHPS |                                                                                                                                                   | No visible phenotype. Mutant seeds displayed reduced germination rates. A modest but significant decrease of 5-CH <sub>3</sub> -PteGlu(n) and 5-CHO-PteGlu(n) by 11 and 33%, respectively) was observed in dry seeds of the mutant as compared with the wild-type, resulting in a decrease in total folate content by 11%.                                                                                                                                                                                                                                                                                                                                                                                                                                                       | 17289662 | 2 | 1 |
| AT1G44446 | CHI          | ATCAO CAO CHLORINA 1 CHLOROPHYLL A OXYGENASE CHLOROPHYLL B SYNTHASE                                                                               | Chlorophyll contents decreased by approximately 40% compared to the parental line ( <i>chl1-1/GFP-CAO</i> ).                                                                                                                                                                                                                                                                                                                                                                                                                                                                                                                                                                                                                                                                     | 17291312 | 1 | 0 |
| AT1G44446 | CHI          | ATCAO CAO CHLORINA 1 CHLOROPHYLL A OXYGENASE CHLOROPHYLL B SYNTHASE                                                                               | Significant increase in the expression of the GFP-CAO transgene.                                                                                                                                                                                                                                                                                                                                                                                                                                                                                                                                                                                                                                                                                                                 | 17291312 | 1 | 0 |
| AT1G71230 | CSN5B        | AJH2 COP9-siGnaalosome 5B CSN5                                                                                                                    | Double null homozygous mutant progeny invariably die at the seedling stage, do not express detectable CSN5 proteins, and are virtually identical to the null alleles of the <i>cop/det/fus</i> mutants.                                                                                                                                                                                                                                                                                                                                                                                                                                                                                                                                                                          | 17307927 | 1 | 1 |
| AT1G71230 | CSN5B        | AJH2 COP9-siGnaalosome 5B CSN5                                                                                                                    | During the first two to three DAG, the double homozygous mutant progeny display the typical photomorphogenic phenotype of the <i>fusca</i> mutants.                                                                                                                                                                                                                                                                                                                                                                                                                                                                                                                                                                                                                              | 17307927 | 1 | 1 |

|           |                   |                                                                                                     |                                                                                                                                                                                                                                                                                                                                                                                      |          |   |   |
|-----------|-------------------|-----------------------------------------------------------------------------------------------------|--------------------------------------------------------------------------------------------------------------------------------------------------------------------------------------------------------------------------------------------------------------------------------------------------------------------------------------------------------------------------------------|----------|---|---|
| AT1G71230 | CSN5B             | AJH2 COP9-signalosome 5B CSN5                                                                       | In double homozygous progeny, significant reduction of CSN1, CSN6, CSN7, and CSN8 and in a very slight reduction of CSN4. In the case of CSN3, the complete loss of function of CSN5 results in the accumulation of a larger and possibly modified CSN3 form, whereas the normal (smaller) CSN3 form is present predominantly in wild type.                                          | 17307927 | 1 | 1 |
| AT1G71230 | CSN5B             | AJH2 COP9-signalosome 5B CSN5                                                                       | In the homozygous progeny, anthocyanin accumulation (purple coloration) in the cotyledons of developing embryos.                                                                                                                                                                                                                                                                     | 17307927 | 1 | 1 |
| AT1G71230 | CSN5B             | AJH2 COP9-signalosome 5B CSN5                                                                       | Mutation is lethal in the homozygous state.                                                                                                                                                                                                                                                                                                                                          | 17307927 | 1 | 1 |
| AT1G71230 | CSN5B             | AJH2 COP9-signalosome 5B CSN5                                                                       | A residual derubylation activity can be observed in the double mutant seedlings.                                                                                                                                                                                                                                                                                                     | 17307927 | 1 | 0 |
| AT1G71230 | CSN5B             | AJH2 COP9-signalosome 5B CSN5                                                                       | At 6 to 7 DAG, the double mutants uniformly start to form the first pair of true leaves and eventually develop into impaired small plantlets, with dark red cotyledons and asymmetrical leaves.                                                                                                                                                                                      | 17307927 | 1 | 1 |
| AT1G71230 | CSN5B             | AJH2 COP9-signalosome 5B CSN5                                                                       | None of the double mutants arrest at the seedling stage, and even though severely compromised, mutant plantlets survive to a mature stage.                                                                                                                                                                                                                                           | 17307927 | 1 | 1 |
| AT1G71230 | CSN5B             | AJH2 COP9-signalosome 5B CSN5                                                                       | Mutants are virtually indistinguishable from wild-type plants at all developmental stages (germination, vegetative and reproductive).                                                                                                                                                                                                                                                | 17307927 | 1 | 1 |
| AT1G71230 | CSN5B             | AJH2 COP9-signalosome 5B CSN5                                                                       | No detectable changes in the cellular pools of COP9 signalosome complex subunits.                                                                                                                                                                                                                                                                                                    | 17307927 | 1 | 0 |
| AT1G71230 | CSN5B             | AJH2 COP9-signalosome 5B CSN5                                                                       | Mutants are virtually indistinguishable from wild-type siblings in the dark and in all light conditions, both at seedling and mature stages.                                                                                                                                                                                                                                         | 17307927 | 1 | 1 |
| AT1G69670 | CUL3B             |                                                                                                     | Mutants are virtually indistinguishable from wild-type siblings in the dark and in all light conditions, both at seedling and mature stages.                                                                                                                                                                                                                                         | 17307927 | 1 | 1 |
| AT1G69670 | CUL3B             |                                                                                                     | Significant increase (five- to sixfold) in the total amount of CSN5 with respect to the CSN5 level observed in the <i>csn5a-2</i> single mutant.                                                                                                                                                                                                                                     | 17307927 | 1 | 0 |
| AT1G26830 | CUL3A             | CUL3                                                                                                | Mutants are virtually indistinguishable from wild-type siblings in the dark and in all light conditions, both at seedling and mature stages.                                                                                                                                                                                                                                         | 17307927 | 1 | 1 |
| AT1G26830 | CUL3A             | CUL3                                                                                                | Significant increase (five- to sixfold) in the total amount of CSN5 with respect to the CSN5 level observed in the <i>csn5a-2</i> single mutant.                                                                                                                                                                                                                                     | 17307927 | 1 | 0 |
| AT1G22920 | CSN5A             | AJH1 CSN5B                                                                                          | At the reproductive stage, the mutants exhibit severe developmental defects that result in dwarf stature and the loss of apical dominance (52 DAG).                                                                                                                                                                                                                                  | 17307927 | 1 | 1 |
| AT1G22920 | CSN5A             | AJH1 CSN5B                                                                                          | At the vegetative stage, the <i>csn5a</i> plantlets are characterized by small, light green, and curly rosettes (12 and 14DAG), which are almost completely depleted of trichomes, in contrast with wild-type.                                                                                                                                                                       | 17307927 | 1 | 0 |
| AT1G22920 | CSN5A             | AJH1 CSN5B                                                                                          | Mutants are not lethal at the seedling stage, and, at a few DAG, the purple cotyledons turn light green before the production of true leaves.                                                                                                                                                                                                                                        | 17307927 | 1 | 1 |
| AT1G22920 | CSN5A             | AJH1 CSN5B                                                                                          | Seedlings have purple cotyledons.                                                                                                                                                                                                                                                                                                                                                    | 17307927 | 1 | 1 |
| AT1G22920 | CSN5A             | AJH1 CSN5B                                                                                          | Shorter hypocotyls in the dark, shorter roots, smaller flowers, a decreased number of root hairs in response to jasmonic acid treatment, and altered light and auxin responses.                                                                                                                                                                                                      | 17307927 | 1 | 1 |
| AT1G22920 | CSN5A             | AJH1 CSN5B                                                                                          | The cellular pools of the COP9 signalosome complex subunits: CSN1, CSN3, CSN5, CSN6, CSN7, and CSN8, are reduced drastically compared with those in wild type.                                                                                                                                                                                                                       | 17307927 | 1 | 0 |
| AT1G22920 | CSN5A             | AJH1 CSN5B                                                                                          | <i>csn5a-1</i> and <i>csn5a-2</i> are virtually indistinguishable from each other in the initial few DAG, starting from 8 DAG and throughout the vegetative stage, the phenotype of <i>csn5a-2</i> is less severe than that of <i>csn5a-1</i> , in terms of both rosette size and trichome density. This difference becomes particularly evident at the reproductive phase (52 DAG). | 17307927 | 1 | 0 |
| AT1G22920 | CSN5A             | AJH1 CSN5B                                                                                          | Double null homozygous mutant progeny invariably die at the seedling stage, do not express detectable CSN5 proteins, and are virtually identical to the null alleles of the <i>cop/det/fus</i> mutants.                                                                                                                                                                              | 17307927 | 1 | 0 |
| AT1G22920 | CSN5A             | AJH1 CSN5B                                                                                          | During the first two to three DAG, the double homozygous mutant progeny display the typical photomorphogenic phenotype of the <i>fusca</i> mutants.                                                                                                                                                                                                                                  | 17307927 | 1 | 0 |
| AT1G22920 | CSN5A             | AJH1 CSN5B                                                                                          | In double homozygous progeny, significant reduction of CSN1, CSN6, CSN7, and CSN8 and in a very slight reduction of CSN4. In the case of CSN3, the complete loss of function of CSN5 results in the accumulation of a larger and possibly modified CSN3 form, whereas the normal (smaller) CSN3 form is present predominantly in wild type.                                          | 17307927 | 1 | 0 |
| AT1G22920 | CSN5A             | AJH1 CSN5B                                                                                          | In the homozygous progeny, anthocyanin accumulation (purple coloration) in the cotyledons of developing embryos.                                                                                                                                                                                                                                                                     | 17307927 | 1 | 1 |
| AT1G22920 | CSN5A             | AJH1 CSN5B                                                                                          | Mutation is lethal in the homozygous state.                                                                                                                                                                                                                                                                                                                                          | 17307927 | 1 | 1 |
| AT1G22920 | CSN5A             | AJH1 CSN5B                                                                                          | A residual derubylation activity can be observed in the double mutant seedlings.                                                                                                                                                                                                                                                                                                     | 17307927 | 1 | 1 |
| AT1G22920 | CSN5A             | AJH1 CSN5B                                                                                          | At 6 to 7 DAG, the double mutants uniformly start to form the first pair of true leaves and eventually develop into impaired small plantlets, with dark red cotyledons and asymmetrical leaves.                                                                                                                                                                                      | 17307927 | 1 | 1 |
| AT1G22920 | CSN5A             | AJH1 CSN5B                                                                                          | None of the double mutants arrest at the seedling stage, and even though severely compromised, mutant plantlets survive to a mature stage.                                                                                                                                                                                                                                           | 17307927 | 1 | 1 |
| AT1G22920 | CSN5A             | AJH1 CSN5B                                                                                          | Mutants are virtually indistinguishable from wild-type siblings in the dark and in all light conditions, both at seedling and mature stages.                                                                                                                                                                                                                                         | 17307927 | 1 | 1 |
| AT1G22920 | CSN5A             | AJH1 CSN5B                                                                                          | Significant increase (five- to sixfold) in the total amount of CSN5 with respect to the CSN5 level observed in the <i>csn5a-2</i> single mutant.                                                                                                                                                                                                                                     | 17307927 | 1 | 0 |
| AT1G02090 | FUS5              | ATCSN7 COP15 COP9 SIGNALOSOME SUBUNIT 7 CSN7 FUSCA 5                                                | In the homozygous progeny, anthocyanin accumulation (purple coloration) in the cotyledons of developing embryos.                                                                                                                                                                                                                                                                     | 17307927 | 1 | 1 |
| AT1G02090 | FUS5              | ATCSN7 COP15 COP9 SIGNALOSOME SUBUNIT 7 CSN7 FUSCA 5                                                | In the homozygous progeny, the mutation leads to CSN1, CSN3, CSN4, CSN6, and CSN8 instability, accompanied by a mild reduction of CSN5.                                                                                                                                                                                                                                              | 17307927 | 1 | 0 |
| AT1G23310 | GGAT1             | AOAT1 GGT1                                                                                          | ABA-regulated seed germination was unaffected under the experimental conditions used.                                                                                                                                                                                                                                                                                                | 17318317 | 1 | 1 |
| AT1G23310 | GGAT1             | AOAT1 GGT1                                                                                          | Although <i>ggt1-1</i> did not affect cold tolerance of plants kept in the dark, mutant plants subjected to cold and light treatment exhibited severe leaf chlorosis. This light sensitivity of <i>ggt1-1</i> could be alleviated either by reduced light intensity or by growth on media containing sucrose.                                                                        | 17318317 | 1 | 0 |
| AT1G23310 | GGAT1             | AOAT1 GGT1                                                                                          | In the absence of ABA treatment, root elongation of <i>ggt1-1</i> was reduced nearly 50% compared to wild-type.                                                                                                                                                                                                                                                                      | 17318317 | 1 | 1 |
| AT1G23310 | GGAT1             | AOAT1 GGT1                                                                                          | Mutant leaves were stained with NBT or DAB; the results indicated an increased level of H2O2 but little difference in O2-. This difference in H2O2 was further investigated by quantitative determination of seedling H2O2 using an Amplex Red assay. Light grown <i>ggt1-1</i> seedlings, but not dark grown seedlings, had increased levels of H2O2 relative to wild-type.         | 17318317 | 1 | 1 |
| AT1G23310 | GGAT1             | AOAT1 GGT1                                                                                          | Mutant plants had a pale green color and grew more slowly than wild-type.                                                                                                                                                                                                                                                                                                            | 17318317 | 1 | 1 |
| AT1G23310 | GGAT1             | AOAT1 GGT1                                                                                          | Proline accumulation was higher in untreated <i>ggt1-1</i> seedlings and also increased to a higher than wild-type level upon ABA treatment.                                                                                                                                                                                                                                         | 17318317 | 1 | 1 |
| AT1G23310 | GGAT1             | AOAT1 GGT1                                                                                          | The mutant shows a reduction in ABA-responsive RD29A expression. In <i>ggt1-1</i> , expression of RD29A:LUC was approximately one-third of the wild-type level at 3 h after application of 100 $\mu$ M ABA.                                                                                                                                                                          | 17318317 | 1 | 0 |
| AT1G23310 | GGAT1             | AOAT1 GGT1                                                                                          | Same phenotype as <i>ggt1-1</i> .                                                                                                                                                                                                                                                                                                                                                    | 17318317 | 1 | 1 |
| AT1G17290 | no gene was found |                                                                                                     | plants appear normal under normal growth conditions. When grown on low-nitrogen medium with alanine supplementation, the mutant plants showed reduced growth.                                                                                                                                                                                                                        | 17319845 |   |   |
| AT1G09530 | PIF3              | BHLH8 EN100 PAP3                                                                                    | When grown under constant red light, the mutant had shorter hypocotyls compared with wild type plants.                                                                                                                                                                                                                                                                               | 17319847 | 1 | 1 |
| AT1G09530 | PIF3              | BHLH8 EN100 PAP3                                                                                    | Under constant red-light conditions, the hypocotyl length of the double mutant was intermediate to that of the parental single mutants.                                                                                                                                                                                                                                              | 17319847 | 1 | 1 |
| AT1G45145 | TRX5              | LIV1                                                                                                | Insensitive to victorin 1, microbial toxin produced by the fungus <i>Cochliobolus victoriae</i> .                                                                                                                                                                                                                                                                                    | 17322408 | 1 | 0 |
| AT1G55250 | HUB2              | hisTone mono-ubiquitination 2                                                                       | The chlorophyll content index of the double mutant did not differ from the single mutants, and the germination percentage of freshly harvested seeds was slightly higher than that of the single mutants.                                                                                                                                                                            | 17329563 | 1 | 1 |
| AT1G55250 | HUB2              | hisTone mono-ubiquitination 2                                                                       | Same phenotypes as the single mutants.                                                                                                                                                                                                                                                                                                                                               | 17329563 | 1 | 1 |
| AT1G55250 | HUB2              | hisTone mono-ubiquitination 2                                                                       | Reduced seed dormancy phenotype.                                                                                                                                                                                                                                                                                                                                                     | 17329563 | 1 | 1 |
| AT1G55250 | HUB2              | hisTone mono-ubiquitination 2                                                                       | Mutant plants were smaller, with pale green laminae and irregular blade surface, and their inflorescence stems were thinner than those of the Col stems.                                                                                                                                                                                                                             | 17329565 | 1 | 1 |
| AT1G55250 | HUB2              | hisTone mono-ubiquitination 2                                                                       | Reduction in the rosette biomass to 43 and 42% of fresh and dry weight of Col, respectively, and weak but significant (P < 0.001) inhibition of the root growth when the kinetic slopes of <i>hub2-1</i> and Col were compared.                                                                                                                                                      | 17329565 | 1 | 1 |
| AT1G55250 | HUB2              | hisTone mono-ubiquitination 2                                                                       | No new leaf and flower phenotypes were observed compared to the single mutant parents, and the biomass of the double mutant lines fell statistically in the same group as that of both single parents.                                                                                                                                                                               | 17329565 | 1 | 1 |
| AT1G14670 | TMN2              | EMPS                                                                                                | No increased tolerance to arsenic compared to wild type.                                                                                                                                                                                                                                                                                                                             | 17335514 | 1 | 1 |
| AT1G09570 | PHYA              | ELONGATED HYPOCOTYL 8 FAR RED ELONGATED 1 FAR RED ELONGATED HYPOCOTYL 2 PHY2 FRE1 HY8 phyTochrome A | Arsenic accumulation appeared slightly decreased in the mutants, but it did not differ significantly from that of wild type.                                                                                                                                                                                                                                                         | 17335514 | 1 | 1 |
| AT1G09570 | PHYA              | ELONGATED HYPOCOTYL 8 FAR RED ELONGATED 1 FAR RED ELONGATED HYPOCOTYL 2 PHY2 FRE1 HY8 phyTochrome A | Mutant showed no light dependence of arsenic tolerance, whereas wild-type seedlings showed an increased arsenate tolerance when grown in the dark compared with WT seedlings grown in the light.                                                                                                                                                                                     | 17335514 | 1 | 1 |

|           |         |                                                                                                     |                                                                                                                                                                                                                                                                                                                                                                                                                                                                                                                                                                                                                                                                                                                                                                                                                                                                                                     |          |   |   |
|-----------|---------|-----------------------------------------------------------------------------------------------------|-----------------------------------------------------------------------------------------------------------------------------------------------------------------------------------------------------------------------------------------------------------------------------------------------------------------------------------------------------------------------------------------------------------------------------------------------------------------------------------------------------------------------------------------------------------------------------------------------------------------------------------------------------------------------------------------------------------------------------------------------------------------------------------------------------------------------------------------------------------------------------------------------------|----------|---|---|
| AT1G09570 | PHYA    | ELONGATED HYPOCOTYL 8 FAR RED ELONGATED 1 FAR RED ELONGATED HYPOCOTYL 2 PHY2 FRE1 HYS phyTochrome A | When grown under constant light, mutant seeds showed a significantly higher rate of survival than WT seeds in the presence of arsenate.                                                                                                                                                                                                                                                                                                                                                                                                                                                                                                                                                                                                                                                                                                                                                             | 17335514 | 1 | 1 |
| AT1G09570 | PHYA    | ELONGATED HYPOCOTYL 8 FAR RED ELONGATED 1 FAR RED ELONGATED HYPOCOTYL 2 PHY2 FRE1 HYS phyTochrome A | Less inhibition of thiol synthesis was observed in the mutant.                                                                                                                                                                                                                                                                                                                                                                                                                                                                                                                                                                                                                                                                                                                                                                                                                                      | 17335514 | 1 | 1 |
| AT1G09570 | PHYA    | ELONGATED HYPOCOTYL 8 FAR RED ELONGATED 1 FAR RED ELONGATED HYPOCOTYL 2 PHY2 FRE1 HYS phyTochrome A | No clear differences in arsenic speciation (arsenate or arsenite) in the mutant compared to wild type.                                                                                                                                                                                                                                                                                                                                                                                                                                                                                                                                                                                                                                                                                                                                                                                              | 17335514 | 1 | 0 |
| AT1G09570 | PHYA    | ELONGATED HYPOCOTYL 8 FAR RED ELONGATED 1 FAR RED ELONGATED HYPOCOTYL 2 PHY2 FRE1 HYS phyTochrome A | After 5 days growth under far-red light, the double mutant showed the same elongated hypocotyl phenotype as the loss-of-function allele phyA-211.                                                                                                                                                                                                                                                                                                                                                                                                                                                                                                                                                                                                                                                                                                                                                   | 17335514 | 1 | 1 |
| AT1G09560 | GLP4    | GLP5                                                                                                | No increased tolerance to arsenic compared to wild type.                                                                                                                                                                                                                                                                                                                                                                                                                                                                                                                                                                                                                                                                                                                                                                                                                                            | 17335514 | 1 | 1 |
| AT2G15290 | TIC21   | CIA5 PIC1                                                                                           | Cotyledons in young homozygous progeny were red, most likely because chlorophyll was low or absent, and anthocyanin pigments accumulated.                                                                                                                                                                                                                                                                                                                                                                                                                                                                                                                                                                                                                                                                                                                                                           | 17337631 | 1 | 1 |
| AT2G15290 | TIC21   | CIA5 PIC1                                                                                           | Dwarfed and chlorotic mutant plants.                                                                                                                                                                                                                                                                                                                                                                                                                                                                                                                                                                                                                                                                                                                                                                                                                                                                | 17337631 | 1 | 1 |
| AT2G15290 | TIC21   | CIA5 PIC1                                                                                           | In the mutant's homozygous progeny, mature rosette leaves were retarded in growth. Secondary and tertiary veins in mutant leaves were thicker than in the wild type, and their diameter was commensurate with that of the primary vein. The organization of leaf mesophyll into palisade and spongy parenchyma cells was lost, and the leaf surface was extremely curled. This deformation in the mutant leaf was already visible in cotyledons. In addition, leaf cross sections revealed that mesophyll cells, in contrast with wild-type plants, do not contain fully differentiated chloroplasts.                                                                                                                                                                                                                                                                                               | 17337631 | 1 | 1 |
| AT2G15290 | TIC21   | CIA5 PIC1                                                                                           | Plastids of cotyledons, leaves, and shoot apices in the mutant plants were characterized by the presence of electron-dense phytoferritin aggregates. Those clusters were not found in any chloroplasts of wild-type plants.                                                                                                                                                                                                                                                                                                                                                                                                                                                                                                                                                                                                                                                                         | 17337631 | 1 | 1 |
| AT2G15290 | TIC21   | CIA5 PIC1                                                                                           | Roots were smaller than in wild-type plants. However, no significant phenotype in roots of mutants maintained on sucrose-supplemented medium was observed.                                                                                                                                                                                                                                                                                                                                                                                                                                                                                                                                                                                                                                                                                                                                          | 17337631 | 1 | 1 |
| AT2G15290 | TIC21   | CIA5 PIC1                                                                                           | The majority of the slowly growing homozygous mutant progeny produced almost transparent rosette leaves; however, in approximately one-third of the plants, the leaves appeared white. This subpopulation of mutants was even smaller and did not produce inflorescences.                                                                                                                                                                                                                                                                                                                                                                                                                                                                                                                                                                                                                           | 17337631 | 1 | 1 |
| AT2G15290 | TIC21   | CIA5 PIC1                                                                                           | The shoot apex and the very young emerging leaves of homozygous progeny were pale green and their leaves turned chlorotic while growing. After 6 weeks on sucrose-containing agar, surviving mutant plants were able to produce an inflorescence; again, the young sepals of the flower were pale green and became white subsequently.                                                                                                                                                                                                                                                                                                                                                                                                                                                                                                                                                              | 17337631 | 1 | 1 |
| AT2G15290 | TIC21   | CIA5 PIC1                                                                                           | The style and developing silique of the flower of the homozygous progeny were pale green, whereas leaves and stem accumulated anthocyanin pigments.                                                                                                                                                                                                                                                                                                                                                                                                                                                                                                                                                                                                                                                                                                                                                 | 17337631 | 1 | 1 |
| AT1G52930 | BR1X1-2 |                                                                                                     | Absence of ABA-induced inhibition of seed germination.                                                                                                                                                                                                                                                                                                                                                                                                                                                                                                                                                                                                                                                                                                                                                                                                                                              | 17347412 | 1 | 1 |
| AT1G52930 | BR1X1-2 |                                                                                                     | Mutant plants exhibit all known major ABA defects (seed dormancy, stomatal opening, growth inhibition).                                                                                                                                                                                                                                                                                                                                                                                                                                                                                                                                                                                                                                                                                                                                                                                             | 17347412 | 1 | 1 |
| AT1G52930 | BR1X1-2 |                                                                                                     | Reduced seed dormancy phenotype.                                                                                                                                                                                                                                                                                                                                                                                                                                                                                                                                                                                                                                                                                                                                                                                                                                                                    | 17347412 | 1 | 1 |
| AT1G52930 | BR1X1-2 |                                                                                                     | Seedling growth inhibition by ABA was substantially reduced in the mutant compared with that of the wild type. In the absence of ABA, the mutant seedlings developed normally and were indistinguishable from the wild-type seedlings.                                                                                                                                                                                                                                                                                                                                                                                                                                                                                                                                                                                                                                                              | 17347412 | 1 | 1 |
| AT1G52930 | BR1X1-2 |                                                                                                     | The defect exhibited by the double mutant in ABA-induced stomatal closure was similar to that exhibited by both single mutants.                                                                                                                                                                                                                                                                                                                                                                                                                                                                                                                                                                                                                                                                                                                                                                     | 17347412 | 1 | 1 |
| AT1G52920 | GCR2    | GPCR                                                                                                | Absence of ABA-induced inhibition of seed germination.                                                                                                                                                                                                                                                                                                                                                                                                                                                                                                                                                                                                                                                                                                                                                                                                                                              | 17347412 | 1 | 1 |
| AT1G52920 | GCR2    | GPCR                                                                                                | Mutant plants exhibit all known major ABA defects (seed dormancy, stomatal opening, growth inhibition).                                                                                                                                                                                                                                                                                                                                                                                                                                                                                                                                                                                                                                                                                                                                                                                             | 17347412 | 1 | 1 |
| AT1G52920 | GCR2    | GPCR                                                                                                | Reduced seed dormancy phenotype.                                                                                                                                                                                                                                                                                                                                                                                                                                                                                                                                                                                                                                                                                                                                                                                                                                                                    | 17347412 | 1 | 1 |
| AT1G52920 | GCR2    | GPCR                                                                                                | Seedling growth inhibition by ABA was substantially reduced in the mutant compared with that of the wild type. In the absence of ABA, the mutant seedlings developed normally and were indistinguishable from the wild-type seedlings.                                                                                                                                                                                                                                                                                                                                                                                                                                                                                                                                                                                                                                                              | 17347412 | 1 | 1 |
| AT1G52920 | GCR2    | GPCR                                                                                                | The defect exhibited by the double mutant in ABA-induced stomatal closure was similar to that exhibited by both single mutants.                                                                                                                                                                                                                                                                                                                                                                                                                                                                                                                                                                                                                                                                                                                                                                     | 17347412 | 1 | 1 |
| AT1G67080 | ABA4    |                                                                                                     | Neoxanthin was absent in the mutant genotype, while an increase in Violaxanthin content was recorded. aba4-1 leaf discs were clearly more sensitive to light stress than the wild type (90% of chlorophyll was bleached in aba4-1 versus 35% in the wild type) aba4-1 has a reduced steady state ABA content (45% of wild-type content)                                                                                                                                                                                                                                                                                                                                                                                                                                                                                                                                                             | 17351115 | 1 | 1 |
| AT1G67080 | ABA4    |                                                                                                     | aba4-1 npql underwent a significant reduction in leaf chlorophyll content and a strong accumulation of the antioxidant molecule tocopherol with respect to npql aba4-1 npql was photoinhibited further and had only recovered to similar levels as the other genotypes after 6 d decrease of the chlorophyll/carotenoid ratio and an increase in tocopherol content                                                                                                                                                                                                                                                                                                                                                                                                                                                                                                                                 | 17351115 | 1 | 1 |
| AT1G08550 | NPQ1    |                                                                                                     | aba4-1 npql underwent a significant reduction in leaf chlorophyll content and a strong accumulation of the antioxidant molecule tocopherol with respect to npql aba4-1 npql was photoinhibited further and had only recovered to similar levels as the other genotypes after 6 d decrease of the chlorophyll/carotenoid ratio and an increase in tocopherol content                                                                                                                                                                                                                                                                                                                                                                                                                                                                                                                                 | 17351115 | 1 | 1 |
| AT1G62360 | STM     |                                                                                                     | 30 from a total of 40 seedlings (75%) developed at least one leaf 8 days after germination and all double mutant progeny developed leaves by day 20. In 19 stm-1 trn2-23010 double mutant seedlings, leaves initiated from the base of the cotyledons, which were always fused due to lack of early STM activity. In the remaining 21 double mutant progeny single leaves or side shoots arose laterally, from the outside of the fused base of the petioles instead of being initiated from the shoot apex and thus resembled stm-1 mutant side shoots which are initiated after a long delay.                                                                                                                                                                                                                                                                                                     | 17351828 | 1 | 1 |
| AT1G62360 | STM     |                                                                                                     | The double mutant progeny does not develop flowers.                                                                                                                                                                                                                                                                                                                                                                                                                                                                                                                                                                                                                                                                                                                                                                                                                                                 | 17351828 | 1 | 1 |
| AT1G62360 | STM     |                                                                                                     | About 51% of stm-5 trn2-23010 double mutant seedlings produced leaves by 8 days after germination, compared to only 3% in the stm-5 single mutant. In contrast to combination with stm-1, leaves of stm-5 trn2-23010 double mutants never initiated from outside the base of the cotyledon petioles but emerged internally to the cotyledons where the SAM normally resides in wild type.                                                                                                                                                                                                                                                                                                                                                                                                                                                                                                           | 17351828 | 1 | 1 |
| AT1G02860 | NLA     | BAH1 BENZOIC ACID HYPERSENSITIVE 1 niTroGen limiTaTion adapTaTion                                   | In contrast to wild type, anthocyanin accumulation did not occur in the senescing mutant rosette leaves.                                                                                                                                                                                                                                                                                                                                                                                                                                                                                                                                                                                                                                                                                                                                                                                            | 17355433 | 1 | 1 |
| AT1G02860 | NLA     | BAH1 BENZOIC ACID HYPERSENSITIVE 1 niTroGen limiTaTion adapTaTion                                   | Mutants failed to adapt to the conditions of nitrogen limitation and started senescence much earlier and more rapidly than did wild-type plants supplied with 3 mM nitrate: mutant plants supplied with 10 mM nitrate had a similar pattern of growth and development to wild type. When the nitrate concentration was reduced to 3 mM, the mutant plants started senescence in the fifth rosette leaf at 24 DAG, and after this point senescence progressed rapidly with all rosette leaves showing senescence symptoms at 26 DAG, and the whole rosette dying at 32 DAG. In contrast, wild-type plants displayed no senescence symptoms in the fifth rosette leaf until 32 DAG. In wild-type plants, the process of senescence proceeded slowly and gradually from the fifth to the youngest rosette leaves, and it took at least 2 weeks for all rosette leaves to show the senescence symptoms. | 17355433 | 1 | 1 |
| AT1G02860 | NLA     | BAH1 BENZOIC ACID HYPERSENSITIVE 1 niTroGen limiTaTion adapTaTion                                   | The cauline leaves in the mutant plants started senescence at 28 DAG, at least 10 days earlier than those in the wild-type plants. Further, the developing mutant siliques initiated senescence in their tips at 32 DAG, while the wild-type siliques showed no senescence symptoms throughout their development but accumulated abundant anthocyanin which was not observed in the mutant siliques.                                                                                                                                                                                                                                                                                                                                                                                                                                                                                                | 17355433 | 1 | 1 |
| AT1G02860 | NLA     | BAH1 BENZOIC ACID HYPERSENSITIVE 1 niTroGen limiTaTion adapTaTion                                   | The early senescence process was arrested when nitrate was added after depletion.                                                                                                                                                                                                                                                                                                                                                                                                                                                                                                                                                                                                                                                                                                                                                                                                                   | 17355433 | 1 | 1 |
| AT1G02860 | NLA     | BAH1 BENZOIC ACID HYPERSENSITIVE 1 niTroGen limiTaTion adapTaTion                                   | The occurrence (at 24 DAG) and progression (at 28 DAG) of senescence in mutant rosette leaves were not accompanied by a significant reduction in the amounts of nitrogen-containing compounds: nitrate, total amino acids, soluble proteins, and total nitrogen. By contrast, they were largely reduced in the wild-type plants.                                                                                                                                                                                                                                                                                                                                                                                                                                                                                                                                                                    | 17355433 | 1 | 1 |
| AT1G02860 | NLA     | BAH1 BENZOIC ACID HYPERSENSITIVE 1 niTroGen limiTaTion adapTaTion                                   | With the reduction of the nitrate concentration to 1 mM, the occurrence of the senescence phenotype in the rosette leaves of mutant plants was accelerated to 20 DAG, and severe senescence in the developing mutant siliques resulted in their death around 30 DAG without producing viable seeds. Under the same growth condition (1 mM nitrate), wild-type plants did not start senescence in their rosette leaves until 26 DAG, and produced fecund siliques.                                                                                                                                                                                                                                                                                                                                                                                                                                   | 17355433 | 1 | 1 |



|           |        |                                                                                                                                                                                                                                                                                                 |                                                                                                                                                                                                                                                                                                                                                                                                                                                                                                                                                                                                                                                                                                            |          |   |   |
|-----------|--------|-------------------------------------------------------------------------------------------------------------------------------------------------------------------------------------------------------------------------------------------------------------------------------------------------|------------------------------------------------------------------------------------------------------------------------------------------------------------------------------------------------------------------------------------------------------------------------------------------------------------------------------------------------------------------------------------------------------------------------------------------------------------------------------------------------------------------------------------------------------------------------------------------------------------------------------------------------------------------------------------------------------------|----------|---|---|
| ATIG15500 | ATNT2  | T16N11.1; T16N11_1                                                                                                                                                                                                                                                                              | Necrotic leaf lesions in short day conditions at low light. Light-induced accumulation of H(2)O(2) and constitutive expression of genes for copper/zinc superoxide dismutase 2 and ascorbate peroxidase 1.                                                                                                                                                                                                                                                                                                                                                                                                                                                                                                 | 17355434 | 1 | 1 |
| ATIG59870 | PEN3   | ABCG36; ARABIDOPSIS PLEIOTROPIC DRUG RESISTANCE 8; Arabidopsis thaliana ATP-binding cassette G36; ARABIDOPSIS THALIANA ATP-BINDING CASSETTE G36; ATABCG36; ATP-binding cassette G36; ATP-BINDING CASSETTE G36; ATPDR8; F23H11.19; F23H11_19; PDR8; PENETRATION 3; PLEIOTROPIC DRUG RESISTANCE 8 | shoot FW, root length and chlorophyll contents of ko-2 plants are significantly lower than those of wild-type plants                                                                                                                                                                                                                                                                                                                                                                                                                                                                                                                                                                                       | 17355438 | 1 | 1 |
| ATIG74960 | FAB1   | ARABIDOPSIS BETA-KETOACYL-ACP SYNTHETASE 2; ATKAS2; BETA-KETOACYL-ACP SYNTHETASE 2; P25A4.7; P25A4_7; fatty acid biosynthesis 1; KAS2                                                                                                                                                           | embryo lethal.                                                                                                                                                                                                                                                                                                                                                                                                                                                                                                                                                                                                                                                                                             | 17360594 | 1 | 1 |
| ATIG27320 | AHK3   | ORE12                                                                                                                                                                                                                                                                                           | The meristem of the mutants did not stop growing at 5 dpq and kept increasing in size. Furthermore, the growth rate of mutant roots was higher than the wild-type, resulting in longer roots.                                                                                                                                                                                                                                                                                                                                                                                                                                                                                                              | 17363254 |   |   |
| ATIG27320 | AHK3   | ORE12                                                                                                                                                                                                                                                                                           | The root-meristem size of the double mutant was indistinguishable from that of the ahk3 mutant.                                                                                                                                                                                                                                                                                                                                                                                                                                                                                                                                                                                                            | 17363254 |   |   |
| ATIG17170 | GSTU24 |                                                                                                                                                                                                                                                                                                 | As for the root growth assay, the root elongation of both the mutant and the wild-type was inhibited at lower concentrations of TNT than 2,6-DNT. In addition, there was no statistically significant difference of the root elongation between the gst mutant and the wild-type exposed to different concentrations of 2,6-DNT and TNT from t-test.                                                                                                                                                                                                                                                                                                                                                       | 17368510 |   |   |
| ATIG17170 | GSTU24 |                                                                                                                                                                                                                                                                                                 | The plants took up TNT faster than 2,6-DNT. Over 99% of the initial concentration of TNT was removed by the plants after 1 d whereas 30% was removed for 2,6-DNT at the same period of time.                                                                                                                                                                                                                                                                                                                                                                                                                                                                                                               | 17368510 |   |   |
| ATIG09700 | HYL1   | ATDR1 DRB1 DSRNA-BINDING PROTEIN 1 HYPONASTIC LEAVES 1                                                                                                                                                                                                                                          | Increased abundance of miRNA precursors.                                                                                                                                                                                                                                                                                                                                                                                                                                                                                                                                                                                                                                                                   | 17369351 |   |   |
| ATIG01040 | DCL1   | ABNORMAL SUSPENSOR 1 ASU1 ATDCL1 CAF CARPEL FACTORY DICER-LIKE 1 dicer-like 1 EMB60 EMB76 EMBRYO DEFECTIVE 60 EMBRYO DEFECTIVE 76 SHORT INTEGUMENTS 1 SIN1 SUS1 SUSPENSOR 1                                                                                                                     | Increased abundance of miRNA precursors.                                                                                                                                                                                                                                                                                                                                                                                                                                                                                                                                                                                                                                                                   | 17369351 |   |   |
| ATIG55020 | LOX1   |                                                                                                                                                                                                                                                                                                 | developed more emergent (stage VIII) and lateral roots at 10 d. has a moderate increase in the length of the primary root.                                                                                                                                                                                                                                                                                                                                                                                                                                                                                                                                                                                 | 17369372 | 1 | 1 |
| ATIG48920 | NUC-L1 | ATNUC-L1; F27K7.6; F27K7_6; NUC1; nucleolin 1; nucleolin like 1; PARALLEL 1; PARL1                                                                                                                                                                                                              | par1-1 mutants, initially identified based on their aberrant parallel venation pattern in juvenile leaves, exhibit several other developmental defects. They have abnormal venation patterns in their cotyledons, adult leaves, petals, and sepals. In addition, they are shorter, have abnormal leaf shapes, and have reduced apical dominance, rosette size, fertility, and root length compared to wild type plants. The normal adaxial/abaxial arrangement of xylem and phloem is maintained in par1-1 mutant leaves, but, they have a reduced palisade mesophyll layer in the leaf. There are aberrant expression patterns for the DR5:GUS reporter and the Athb8:GUS reporter in the par1-1 mutants. | 17369435 | 3 | 2 |
| ATIG48920 | NUC-L1 | ATNUC-L1; F27K7.6; F27K7_6; NUC1; nucleolin 1; nucleolin like 1; PARALLEL 1; PARL1                                                                                                                                                                                                              | par1-2 mutants have defects in leaf venation patterns, as well as several other developmental defects including reduced stature, reduced apical dominance, and reduced fertility relative to wild type plants. They accumulate pre-rRNA transcripts that have not been spliced at the A0 site.                                                                                                                                                                                                                                                                                                                                                                                                             | 17369435 | 1 | 1 |
| ATIG30490 | ATHB-9 | HB9 PHV                                                                                                                                                                                                                                                                                         | Defects in embryonic cell patterning in essentially all double mutants. Pleiotropic cotyledon phenotypes. Large increase in phenotypic penetrance.                                                                                                                                                                                                                                                                                                                                                                                                                                                                                                                                                         | 17376809 | 1 | 0 |
| ATIG24590 | ESR2   | DRNL ERF090 SOB2                                                                                                                                                                                                                                                                                | Defects in embryonic cell patterning in essentially all double mutants. Pleiotropic cotyledon phenotypes. Large increase in phenotypic penetrance.                                                                                                                                                                                                                                                                                                                                                                                                                                                                                                                                                         | 17376809 | 1 | 0 |
| ATIG24590 | ESR2   | DRNL ERF090 SOB2                                                                                                                                                                                                                                                                                | A quarter of drn-1 drnl-2/DRNL-2 progeny, genotyped as double-homozygous mutants had pink-like embryos, with complete absence of cotyledons. They directly initiated leaves from a functional shoot apical meristem.                                                                                                                                                                                                                                                                                                                                                                                                                                                                                       | 17376809 | 1 | 0 |
| ATIG24590 | ESR2   | DRNL ERF090 SOB2                                                                                                                                                                                                                                                                                | sterile                                                                                                                                                                                                                                                                                                                                                                                                                                                                                                                                                                                                                                                                                                    | 17376809 | 1 | 1 |
| ATIG24590 | ESR2   | DRNL ERF090 SOB2                                                                                                                                                                                                                                                                                | Defective cotyledon development phenotypes at incomplete penetrance, including monocotyledonous seedlings, seedlings with partially fused cotyledons, tricot or various tricot fusion combinations. The inappropriate cotyledon development leads to alterations of leaf phyllotaxy.                                                                                                                                                                                                                                                                                                                                                                                                                       | 17376809 | 1 | 1 |
| ATIG24590 | ESR2   | DRNL ERF090 SOB2                                                                                                                                                                                                                                                                                | No embryo development defects.                                                                                                                                                                                                                                                                                                                                                                                                                                                                                                                                                                                                                                                                             | 17376809 | 1 | 1 |
| ATIG12980 | ESR1   | DRN ERF089                                                                                                                                                                                                                                                                                      | Abnormal cell division observable from the globular embryo stage onwards. Approximately half of homozygous drn-1 embryos show abnormal development in the hypophysis region, or no obvious distinction between embryo proper and suspensor.                                                                                                                                                                                                                                                                                                                                                                                                                                                                | 17376809 | 1 | 1 |
| ATIG12980 | ESR1   | DRN ERF089                                                                                                                                                                                                                                                                                      | Defective cotyledon development phenotypes at incomplete penetrance, including monocotyledonous seedlings, seedlings with partially fused cotyledons, tricot or various tricot fusion combinations. The inappropriate cotyledon development leads to alterations of leaf phyllotaxy.                                                                                                                                                                                                                                                                                                                                                                                                                       | 17376809 | 1 | 1 |
| ATIG12980 | ESR1   | DRN ERF089                                                                                                                                                                                                                                                                                      | Defects in embryonic cell patterning in essentially all double mutants. Pleiotropic cotyledon phenotypes. Large increase in phenotypic penetrance.                                                                                                                                                                                                                                                                                                                                                                                                                                                                                                                                                         | 17376809 | 1 | 1 |
| ATIG12980 | ESR1   | DRN ERF089                                                                                                                                                                                                                                                                                      | A quarter of drn-1 drnl-2/DRNL-2 progeny, genotyped as double-homozygous mutants had pink-like embryos, with complete absence of cotyledons. They directly initiated leaves from a functional shoot apical meristem.                                                                                                                                                                                                                                                                                                                                                                                                                                                                                       | 17376809 | 1 | 1 |
| ATIG12980 | ESR1   | DRN ERF089                                                                                                                                                                                                                                                                                      | sterile                                                                                                                                                                                                                                                                                                                                                                                                                                                                                                                                                                                                                                                                                                    | 17376809 | 1 | 0 |
| ATIG04080 | PRP39  |                                                                                                                                                                                                                                                                                                 | Mutant plants are indistinguishable from WT, except for a delay in time to flowering measured as the number of days to bolting and the total leaf numbers at flowering. On average, the mutant plants flower 10 days and 44 days later than WT plants under long day and short day growth conditions, respectively.                                                                                                                                                                                                                                                                                                                                                                                        | 17380304 | 1 | 1 |
| ATIG04080 | PRP39  |                                                                                                                                                                                                                                                                                                 | The mutant is responsive to a vernalization treatment, the treated mutant plants flowering earlier than mutant plants not subjected to the vernalization treatment.                                                                                                                                                                                                                                                                                                                                                                                                                                                                                                                                        | 17380304 | 1 | 1 |
| ATIG04080 | PRP39  |                                                                                                                                                                                                                                                                                                 | The mutant plants treated with GA flowered earlier than the at prp39-1 plants without GA treatment and at similar times as wild-type plants without GA treatment.                                                                                                                                                                                                                                                                                                                                                                                                                                                                                                                                          | 17380304 | 1 | 1 |
| ATIG49430 | LACS2  | LATERAL ROOT DEVELOPMENT 2 LR2                                                                                                                                                                                                                                                                  | Increased cuticle permeability compared with WT.                                                                                                                                                                                                                                                                                                                                                                                                                                                                                                                                                                                                                                                           | 17396154 | 1 | 1 |
| ATIG49430 | LACS2  | LATERAL ROOT DEVELOPMENT 2 LR2                                                                                                                                                                                                                                                                  | Strongly resistant to infection with Botrytis cinerea strain: infection sites on mutant leaves remained usually symptom free, in contrast to those on Col leaves.                                                                                                                                                                                                                                                                                                                                                                                                                                                                                                                                          | 17396154 | 1 | 1 |
| ATIG49430 | LACS2  | LATERAL ROOT DEVELOPMENT 2 LR2                                                                                                                                                                                                                                                                  | A number of ester-bound monomers were reduced in the mutant.                                                                                                                                                                                                                                                                                                                                                                                                                                                                                                                                                                                                                                               | 17396154 | 1 | 1 |
| ATIG49430 | LACS2  | LATERAL ROOT DEVELOPMENT 2 LR2                                                                                                                                                                                                                                                                  | Increased resistance to Botrytis infection: the visual phenotypes of the leaves 3 days after inoculation show that the lesions larger than the original infection site represent only 5% of lesions compared to 75% in WT plants.                                                                                                                                                                                                                                                                                                                                                                                                                                                                          | 17396154 | 1 | 1 |
| ATIG49430 | LACS2  | LATERAL ROOT DEVELOPMENT 2 LR2                                                                                                                                                                                                                                                                  | Similar phenotype to that described for lacs2-2.                                                                                                                                                                                                                                                                                                                                                                                                                                                                                                                                                                                                                                                           | 17396154 | 1 | 1 |
| ATIG49430 | LACS2  | LATERAL ROOT DEVELOPMENT 2 LR2                                                                                                                                                                                                                                                                  | The distinct osmium-dense cuticular membrane representing insoluble lipid-derived polymers such as cutin, visible at the epidermal outer extracellular matrix of WT plants, could not be seen at the leaf epidermis of the mutant. The remaining outer epidermal extracellular matrix sometimes had a distinct laminated structure.                                                                                                                                                                                                                                                                                                                                                                        | 17396154 | 1 | 1 |
| ATIG49430 | LACS2  | LATERAL ROOT DEVELOPMENT 2 LR2                                                                                                                                                                                                                                                                  | The mutant showed severe damage at a lower concentration of BASTA compared with WT Col-0 plants.                                                                                                                                                                                                                                                                                                                                                                                                                                                                                                                                                                                                           | 17396154 | 1 | 1 |
| ATIG49430 | LACS2  | LATERAL ROOT DEVELOPMENT 2 LR2                                                                                                                                                                                                                                                                  | The rate of water loss from the mutant is significantly higher than that of Col-0 plants.                                                                                                                                                                                                                                                                                                                                                                                                                                                                                                                                                                                                                  | 17396154 | 1 | 1 |
| ATIG49430 | LACS2  | LATERAL ROOT DEVELOPMENT 2 LR2                                                                                                                                                                                                                                                                  | The total amount of omega-hydroxylated fatty acids and their derivatives was reduced 4- to 5-fold in the mutant compared with Col-0. The impact of mutation on the amount of dicarboxylic acids, characteristic of Arabidopsis cutin, was particularly strong, and the amount was reduced to 15-20% of WT amount.                                                                                                                                                                                                                                                                                                                                                                                          | 17396154 | 1 | 1 |
| ATIG13230 | PII-2  |                                                                                                                                                                                                                                                                                                 | Defect in symbiotic interaction with the endophytic fungus Piriformospora indica.                                                                                                                                                                                                                                                                                                                                                                                                                                                                                                                                                                                                                          | 17397506 | 1 | 1 |
| ATIG78290 | SRK2C  | OSK4 SNRK2.8                                                                                                                                                                                                                                                                                    | The activity of glyI in wild type and snrk2.8-1 knockout plants under control conditions and salt stress was tested. Salt treatment stimulated the activity of the enzyme in the wild type plant, but less stimulation was observed in the snrk2.8-1. glyI activity was lower after salt treatment in the snrk2.8-1, but salt stress still increased the protein activity.                                                                                                                                                                                                                                                                                                                                 | 17404219 | 1 | 0 |
| ATIG17220 | FUG1   | F20D23.8; F20D23_8; fu-gaer1                                                                                                                                                                                                                                                                    | Double mutant suppresses leaf variegation due to var2 loss of function. First leaves are smaller with reduced cell size.                                                                                                                                                                                                                                                                                                                                                                                                                                                                                                                                                                                   | 17416734 | 1 | 1 |
| ATIG17220 | FUG1   | F20D23.8; F20D23_8; fu-gaer1                                                                                                                                                                                                                                                                    | Segregates for embryo lethal (3wt:1emb). Homozygotes are not viable.                                                                                                                                                                                                                                                                                                                                                                                                                                                                                                                                                                                                                                       | 17416734 | 1 | 1 |
| ATIG17220 | FUG1   | F20D23.8; F20D23_8; fu-gaer1                                                                                                                                                                                                                                                                    | Double mutant suppresses leaf variegation due to var2 loss of function. First leaves are smaller with reduced cell size.                                                                                                                                                                                                                                                                                                                                                                                                                                                                                                                                                                                   | 17416734 | 1 | 1 |
| ATIG58360 | AAP1   | NAT2                                                                                                                                                                                                                                                                                            | no obvious phenotype, endurance to toxic concentration of phenylalanine (2 mM) which did not influence development of roots and leaves of the mutant nor did a high level of phenylalanine (10 mM) arrested germination as observed in the wildtype                                                                                                                                                                                                                                                                                                                                                                                                                                                        | 17419840 | 1 | 1 |

|           |          |                                                                                                                          |                                                                                                                                                                                                                                                                                                                                                                                                                                                                                                             |          |   |   |
|-----------|----------|--------------------------------------------------------------------------------------------------------------------------|-------------------------------------------------------------------------------------------------------------------------------------------------------------------------------------------------------------------------------------------------------------------------------------------------------------------------------------------------------------------------------------------------------------------------------------------------------------------------------------------------------------|----------|---|---|
| AT1G78240 | QUA2     | OSU1 TSD2                                                                                                                | short, darkgrown hypocotyls, reduced cell adhesion and a dwarfed mature plant. 50% reduction in HG (homogalacturonan) content                                                                                                                                                                                                                                                                                                                                                                               | 17425712 | 1 | 1 |
| AT1G78240 | QUA2     | OSU1 TSD2                                                                                                                | short, darkrown hypocotyls, reduced cell adhesion and a dwarfed mature plant                                                                                                                                                                                                                                                                                                                                                                                                                                | 17425712 | 1 | 1 |
| AT1G58440 | SQE1     | DRY2 XF1                                                                                                                 | Dark grown seedlings have shorter hypocotyls characteristic of de-etiolated seedlings. Roots are highly branched. Plants have short stature and are sterile. Seeds abort.                                                                                                                                                                                                                                                                                                                                   | 17426032 | 4 | 3 |
| AT1G58440 | SQE1     | DRY2 XF1                                                                                                                 | Small plants, seedling lethal.                                                                                                                                                                                                                                                                                                                                                                                                                                                                              | 17426032 | 2 | 2 |
| AT1G16720 | HCF173   |                                                                                                                          | High chlorophyll fluorescence. Not able to grow photoautotrophically on soil but could be maintained on sucrose-supplemented medium (did not develop any fertile flowers). Impaired photosystem II.                                                                                                                                                                                                                                                                                                         | 17435084 | 3 | 2 |
| AT1G47056 | VFB1     |                                                                                                                          | Defects in lateral root formation, delayed root elongation and delayed plant growth. Reduced cell size.                                                                                                                                                                                                                                                                                                                                                                                                     | 17435085 | 2 | 2 |
| AT2G01570 | RGA      | GRS RGA1                                                                                                                 | The double mutant germinated much better in response to increasing red light fluences. At 0 $\mu$ mol.m <sup>-2</sup> red light fluence, the double mutant germinated ~15%, whereas the wildtype and single mutant seeds did not germinate under this light condition. At 5 $\mu$ mol.m <sup>-2</sup> , the double mutant germinated ~60%, whereas the wild type and the two single mutants germinated only ~5%. At a higher red light fluence (65 $\mu$ mol.m <sup>-2</sup> ), all seeds germinated ~100%. | 17449805 | 1 | 1 |
| AT2G01570 | RGA      | GRS RGA1                                                                                                                 | Normal germination compared to wild-type plants in response to varying red light fluences.                                                                                                                                                                                                                                                                                                                                                                                                                  | 17449805 | 1 | 1 |
| AT1G14920 | GAI      | RGA2                                                                                                                     | Normal germination compared to wild-type plants in response to varying red light fluences.                                                                                                                                                                                                                                                                                                                                                                                                                  | 17449805 | 1 | 1 |
| AT1G14920 | GAI      | RGA2                                                                                                                     | The double mutant germinated much better in response to increasing red light fluences. At 0 $\mu$ mol.m <sup>-2</sup> red light fluence, the double mutant germinated ~15%, whereas the wildtype and single mutant seeds did not germinate under this light condition. At 5 $\mu$ mol.m <sup>-2</sup> , the double mutant germinated ~60%, whereas the wild type and the two single mutants germinated only ~5%. At a higher red light fluence (65 $\mu$ mol.m <sup>-2</sup> ), all seeds germinated ~100%. | 17449805 | 1 | 1 |
| AT1G69390 | MINE1    | ARC12                                                                                                                    | Fewer but enlarged plastids. Contain short PtsZ filaments within a single oversized plastid.                                                                                                                                                                                                                                                                                                                                                                                                                | 17451350 | 1 | 0 |
| AT1G78240 | QUA2     | OSU1 TSD2                                                                                                                | Increased activity of axial meristems, reduced root growth and enhanced de-etiolation.                                                                                                                                                                                                                                                                                                                                                                                                                      | 17461780 | 3 | 3 |
| AT1G68740 | PHO1:HI  |                                                                                                                          | Strong reduction in growth and in the capacity to transfer phosphate (Pi) from the root to shoot compared with pho1.                                                                                                                                                                                                                                                                                                                                                                                        | 17461783 | 1 | 1 |
| AT1G68740 | PHO1:HI  |                                                                                                                          | T-DNA knock-out mutants of PHO1:HI neither showed growth defects nor alteration in phosphate (Pi) transport dynamics, or Pi content, compared with wild type.                                                                                                                                                                                                                                                                                                                                               | 17461783 | 1 | 1 |
| AT1G68740 | PHO1:HI  |                                                                                                                          | Vegetative growth of the mutant appears to be comparable with wild type for plants grown in soil, although the mutant has flowers with smaller petals and reduced fertility. The abnormal flower phenotype has been reported to occur in a fraction of the transgenic plants derived from the Madison collection, and is thought to be linked to the presence of an API sequence in the T-DNA.                                                                                                              | 17461783 | 2 | 2 |
| AT1G18570 | MYB51    | HIG1                                                                                                                     | compromised in indolic glucosinolate biosynthesis.                                                                                                                                                                                                                                                                                                                                                                                                                                                          | 17461791 | 1 | 1 |
| AT1G08370 | DCP1     | ATDCP1; decapping 1                                                                                                      | The homozygous progeny does not form flower buds.                                                                                                                                                                                                                                                                                                                                                                                                                                                           | 17485080 | 1 | 0 |
| AT1G08370 | DCP1     | ATDCP1; decapping 1                                                                                                      | The homozygous progeny is seedling lethal, showed arrested postembryonic development including cotyledon expansion, development of vascular networks, root elongation, and shoot development.                                                                                                                                                                                                                                                                                                               | 17485080 | 5 | 1 |
| AT1G01140 | CIPK9    | PKS6 SnRK3.12                                                                                                            | hypersensitive to low potassium media                                                                                                                                                                                                                                                                                                                                                                                                                                                                       | 17486125 | 1 | 1 |
| AT1G01280 | CYP703A2 | DEX2                                                                                                                     | Slightly longer inflorescences, an extended period of blooming, a reduced number of elongated siliques, and overall reduced seed set. About a third of the siliques failed to develop. Pollen was not developed (lower and middle part of the inflorescence) or reduced (apical flowers).                                                                                                                                                                                                                   | 17496121 | 4 | 4 |
| AT1G23010 | LPRI     |                                                                                                                          | Long primary root when grown on low Pi.                                                                                                                                                                                                                                                                                                                                                                                                                                                                     | 17496893 | 1 | 1 |
| AT1G79280 | NUA      | TPR                                                                                                                      | Accumulate nuclear poly(A+) RNA.                                                                                                                                                                                                                                                                                                                                                                                                                                                                            | 17513499 | 1 | 1 |
| AT1G79280 | NUA      | TPR                                                                                                                      | Decreased mRNA levels of the floral repressors FLC and MAF4 and increased mRNA levels of the floral activators FT and SOCL.                                                                                                                                                                                                                                                                                                                                                                                 | 17513499 | 1 | 1 |
| AT1G79280 | NUA      | TPR                                                                                                                      | Extreme early-flowering, stunted in growth, phyllotaxy defects in the inflorescence.                                                                                                                                                                                                                                                                                                                                                                                                                        | 17513499 | 1 | 1 |
| AT1G79280 | NUA      | TPR                                                                                                                      | Increase in SUMO conjugates and decrease in free SUMO.                                                                                                                                                                                                                                                                                                                                                                                                                                                      | 17513499 | 1 | 0 |
| AT1G79280 | NUA      | TPR                                                                                                                      | Similar to nua-1 and esd4-2 single mutants. Have even shorter stamens and reduced fertility than the single mutants.                                                                                                                                                                                                                                                                                                                                                                                        | 17513499 | 2 | 1 |
| AT1G74710 | ICS1     |                                                                                                                          | Following <i>Pythium irregulare</i> infection, the increase in JA levels was comparable in wild-type and sid2-1 plants.                                                                                                                                                                                                                                                                                                                                                                                     | 17513501 | 1 | 1 |
| AT1G74710 | ICS1     |                                                                                                                          | Significantly increased susceptibility to the oomycete <i>Pythium irregulare</i>.                                                                                                                                                                                                                                                                                                                                                                                                                           | 17513501 | 1 | 1 |
| AT1G52340 | ABA2     | GIN1 IS14 SAN3 SDR1 SIS4 SRE1                                                                                            | In contrast to wild type, ABA levels did not increase rapidly after infection with the oomycete <i>Pythium irregulare</i>.                                                                                                                                                                                                                                                                                                                                                                                  | 17513501 | 1 | 1 |
| AT1G52340 | ABA2     | GIN1 IS14 SAN3 SDR1 SIS4 SRE1                                                                                            | Increased susceptibility to <i>P. irregulare</i> compared with the wild type.                                                                                                                                                                                                                                                                                                                                                                                                                               | 17513501 | 1 | 1 |
| AT1G60490 | VPS34    | ATVPS34; F8A5.4; F8A5.4; PHOSPHATIDYLINOSITOL 3-KINASE; PHOSPHATIDYLINOSITOL 3-KINASE; PI3K; vacuolar protein sorting 34 | Mutants showed reduced endocytosis and little ROS production upon exposure to salt stress. Bleaching became visible in the mutant plants after 4-5 days and most plants were dead after 7 days after mutants were transferred to plates containing 150 mM NaCl.                                                                                                                                                                                                                                             | 17521408 | 2 | 2 |
| AT1G17440 | TAF12B   | CKH1 EER4                                                                                                                | Roots are extremely curled. Dark-grown seedlings are hypersensitive to ethylene. Extreme hypocotyl shortening is observed when grown on 100 $\mu$ l/L ethylene.                                                                                                                                                                                                                                                                                                                                             | 17526916 | 3 | 3 |
| AT1G17440 | TAF12B   | CKH1 EER4                                                                                                                | Extreme hypocotyl shortening when grown in the dark. Much smaller than either of the single mutants. Plants die at or near the time at which they flower.                                                                                                                                                                                                                                                                                                                                                   | 17526916 | 3 | 3 |
| AT1G17440 | TAF12B   | CKH1 EER4                                                                                                                | eer4 partially restores the ethylene responsiveness to the ein3-1 mutant. Exposure of the eer4;ein3-1 mutant to saturating levels of ethylene results in moderate hypocotyl inhibition along with the generation of a pronounced apical hook.                                                                                                                                                                                                                                                               | 17526916 | 1 | 1 |
| AT1G17440 | TAF12B   | CKH1 EER4                                                                                                                | Identical to the ein2-5 single mutant. There is no noticeable effect on hypocotyl length of dark grown plants supplemented with ethylene.                                                                                                                                                                                                                                                                                                                                                                   | 17526916 | 1 | 1 |
| AT1G66340 | ETR1     |                                                                                                                          | The mutant was the most sensitive to high salt (NaCl) and osmotic (mannitol) stress in both germination rate and percentage of germinating seedlings turning green.                                                                                                                                                                                                                                                                                                                                         | 17533512 | 2 | 2 |
| AT1G34370 | STOP1    | ATSTOP1                                                                                                                  | Reduced root growth at pH 4.7. Hypersensitive to proton (H+) and aluminum (Al3+) rhizotoxicity. No expression of the AtALMT1 gene (encoding a malate transporter) and malate excretion after Al treatment.                                                                                                                                                                                                                                                                                                  | 17535918 | 3 | 3 |
| AT1G34370 | STOP1    | ATSTOP1                                                                                                                  | No root growth at pH 4.3.                                                                                                                                                                                                                                                                                                                                                                                                                                                                                   | 17535918 | 1 | 1 |
| AT1G05850 | CTL1     | ARM ELP1 ERH2 HOT2 POM1                                                                                                  | The greenhouse-grown mutant was slightly dwarfed.                                                                                                                                                                                                                                                                                                                                                                                                                                                           | 17540573 |   |   |
| AT1G05850 | CTL1     | ARM ELP1 ERH2 HOT2 POM1                                                                                                  | Partial reversion of the hypocotyl-elongation defect of pom1-2.                                                                                                                                                                                                                                                                                                                                                                                                                                             | 17540573 |   |   |
| AT1G27510 | EX2      | EXECUTER 2                                                                                                               | Once they were transferred to the long day conditions (after being grown in constant light until they reached the rosette leaf stage and were ready to bolt), the mutant plants continued to grow similarly to wild type except that their growth was slightly reduced and their final height was ~80% of that of wild type.                                                                                                                                                                                | 17540731 | 1 | 1 |
| AT1G27510 | EX2      | EXECUTER 2                                                                                                               | Under continuous light the mutant plants grew equally well compared to wild type and finally reached the same height.                                                                                                                                                                                                                                                                                                                                                                                       | 17540731 | 1 | 1 |
| AT1G27510 | EX2      | EXECUTER 2                                                                                                               | When mature plants grown under continuous light were shifted to the dark for 8 h free protochlorophyllide accumulated in the mutant to similar levels in rosette leaves and were 3- to 4-fold higher than in wild-type controls.                                                                                                                                                                                                                                                                            | 17540731 | 1 | 0 |
| AT1G27510 | EX2      | EXECUTER 2                                                                                                               | Once they were transferred to the long day conditions (after being grown in constant light until they reached the rosette leaf stage and were ready to bolt), the mutant plants stopped growing.                                                                                                                                                                                                                                                                                                            | 17540731 | 1 | 1 |
| AT1G65650 | UCH2     | EXECUTER 2                                                                                                               | Accumulated less chlorophyll than wild-type. Smaller and more compact rosettes than wild-type. More lanceolate cauline leaves. Less fertile. Under short day conditions, the double mutant develops a less branched primary inflorescence.                                                                                                                                                                                                                                                                  | 17559514 | 2 | 1 |
| AT1G09570 | PHYA     | ELONGATED HYPOCOTYL 8 FAR RED ELONGATED 1 FAR RED ELONGATED HYPOCOTYL 2 PHY2 FRE1 HYS phyTochrome A                      | Whereas, in WT seeds, germination could be promoted by a single red or far-red pulse given after 48 h but not after 3 h (matching the time of highest phyA abundance), the germination was no longer promoted in the mutant in either treatment.                                                                                                                                                                                                                                                            | 17566111 | 1 | 1 |
| AT1G15020 | QS0X1    | QS02                                                                                                                     | Displays more sensitivity to toxic cations than control plants, both as seedlings grown in vitro, and as plants grown in soil.                                                                                                                                                                                                                                                                                                                                                                              | 17568770 | 1 | 1 |
| AT1G15020 | QS0X1    | QS02                                                                                                                     | Whereas the initial rate of uptake (less than 20 min) was not significantly affected by the mutation, both the uptake at longer times (1 h) and the accumulation after 2 days of both toxic cations correlated inversely with QS02 function. With K+ and Rb+ uptake, the initial rate of uptake was not affected by QS02 but, opposite to the results with toxic cations, both the uptake at long times and the accumulation of K+ were directly correlated with QS02 function.                             | 17568770 | 1 | 1 |
| AT1G05180 | AXR1     | AUXIN RESISTANT 1: AUXIN RESISTANT PROTEIN 1: YUP8H12.21; YUP8H12.21                                                     | The triple mutant had an approximately additive phenotype. They were bushy and displayed the reduced fertility of axr1-12 plants.                                                                                                                                                                                                                                                                                                                                                                           | 17586653 | 1 | 1 |

|           |       |                                                                                                                                                                                                                |                                                                                                                                                                                                                                                                                                                                                                                                                                                                                                                                                                                                                                                                                                                                                                                                                                                                                                                                                                                                                                                                                                                                                                                                                                                                                                                                                                                                                                               |          |   |   |
|-----------|-------|----------------------------------------------------------------------------------------------------------------------------------------------------------------------------------------------------------------|-----------------------------------------------------------------------------------------------------------------------------------------------------------------------------------------------------------------------------------------------------------------------------------------------------------------------------------------------------------------------------------------------------------------------------------------------------------------------------------------------------------------------------------------------------------------------------------------------------------------------------------------------------------------------------------------------------------------------------------------------------------------------------------------------------------------------------------------------------------------------------------------------------------------------------------------------------------------------------------------------------------------------------------------------------------------------------------------------------------------------------------------------------------------------------------------------------------------------------------------------------------------------------------------------------------------------------------------------------------------------------------------------------------------------------------------------|----------|---|---|
| AT1G62180 | APR2  | 3'-PHOSPHOADENOSINE-5'-PHOSPHOSULFATE (PAPS) REDUCTASE HOMOLOG 43; 5' adenylylphosphosulfate reductase 2; ADENOSINE-5'-PHOSPHOSULFATE REDUCTASE; AFS REDUCTASE; AFSR; ATAPR2: F19K23.11; F19K23.11; PRH; PRH43 | mutant accumulated 2.5 times more sulfate than the wild type                                                                                                                                                                                                                                                                                                                                                                                                                                                                                                                                                                                                                                                                                                                                                                                                                                                                                                                                                                                                                                                                                                                                                                                                                                                                                                                                                                                  | 17589509 | 1 | 1 |
| AT1G70510 | KNAT2 | ARABIDOPSIS THALIANA KN 1 ATK1                                                                                                                                                                                 | Fruits produced by bp-1, knat2 and bp-1 knat2 plants showed a wild-type aspect, both in replum and valves.                                                                                                                                                                                                                                                                                                                                                                                                                                                                                                                                                                                                                                                                                                                                                                                                                                                                                                                                                                                                                                                                                                                                                                                                                                                                                                                                    | 17592013 | 1 | 1 |
| AT1G65620 | LBD6  | AS2                                                                                                                                                                                                            | The mutant fruits displayed the same phenotype as seen in those of asl-1.                                                                                                                                                                                                                                                                                                                                                                                                                                                                                                                                                                                                                                                                                                                                                                                                                                                                                                                                                                                                                                                                                                                                                                                                                                                                                                                                                                     | 17592013 | 1 | 1 |
| AT1G28320 | DEG15 | GPP                                                                                                                                                                                                            | Immunoblot with $\alpha$ GalP;gMDH antibodies showed that processing of pre-gMDH to gMDH no longer occurred in the homozygous mutant plant.                                                                                                                                                                                                                                                                                                                                                                                                                                                                                                                                                                                                                                                                                                                                                                                                                                                                                                                                                                                                                                                                                                                                                                                                                                                                                                   | 17592111 | 1 | 0 |
| AT1G65620 | LBD6  | AS2                                                                                                                                                                                                            | Mutant leaf petioles displayed clusters of densely cytoplasmic, undifferentiated cells on the adaxial side, coincident with the development of ectopic outgrowths.                                                                                                                                                                                                                                                                                                                                                                                                                                                                                                                                                                                                                                                                                                                                                                                                                                                                                                                                                                                                                                                                                                                                                                                                                                                                            | 17601823 | 2 | 2 |
| AT1G65620 | LBD6  | AS2                                                                                                                                                                                                            | The rosette leaf petioles of the triple mutant plants showed extensive ectopic outgrowth formation in the marginal region, and some outgrowths exhibited a strongly radialized character.                                                                                                                                                                                                                                                                                                                                                                                                                                                                                                                                                                                                                                                                                                                                                                                                                                                                                                                                                                                                                                                                                                                                                                                                                                                     | 17601823 | 1 | 1 |
| AT1G65620 | LBD6  | AS2                                                                                                                                                                                                            | The vascular patterning defects in the triple mutant leaf petioles were greatly enhanced compared with those of the parental plants.                                                                                                                                                                                                                                                                                                                                                                                                                                                                                                                                                                                                                                                                                                                                                                                                                                                                                                                                                                                                                                                                                                                                                                                                                                                                                                          | 17601823 | 1 | 1 |
| AT1G32240 | KAN2  | KANADI 2                                                                                                                                                                                                       | About nine-tenths of the mutants exhibited abaxialized vasculature. The exclusively adaxialized vasculature observed in kan1 kan2 petioles was not detected in bop1 bop2 kan1 kan2 petioles. The radialized portion of bop1 bop2 kan1 kan2 leaves showed various kinds of organ polarity defects. The vascular bundles of nearly half of the leaves (44.0%) consisted of phloem surrounded by xylem, while one-third (36.0%) displayed xylem surrounded by phloem, and a small percentage (16.0%) had a mixture of both types of vasculature.                                                                                                                                                                                                                                                                                                                                                                                                                                                                                                                                                                                                                                                                                                                                                                                                                                                                                                 | 17601823 | 1 | 1 |
| AT1G32240 | KAN2  | KANADI 2                                                                                                                                                                                                       | Quadruple mutant plants developed narrow leaves with ectopic blade outgrowth along the petioles, like bop1 bop2 leaves, as well as ectopic outgrowths on their abaxial lamina, like kan1 kan2 leaves. However, all of the bop1 bop2 kan1 kan2 leaves also showed extended, radialized petiole development that was not observed in either parental genotype.                                                                                                                                                                                                                                                                                                                                                                                                                                                                                                                                                                                                                                                                                                                                                                                                                                                                                                                                                                                                                                                                                  | 17601823 | 1 | 1 |
| AT1G32240 | KAN2  | KANADI 2                                                                                                                                                                                                       | bop1 bop2 kan1 kan2 stems had a decreased ratio of adaxialized vascular phenotypes compared with kan1 kan2 stems. Similar to what was observed in petioles, 6.7% of bop1 bop2 kan1 kan2 stems exhibited an abaxialized phenotype of xylem surrounded by phloem, while others (13.3%) had both types of vasculature in a single stem.                                                                                                                                                                                                                                                                                                                                                                                                                                                                                                                                                                                                                                                                                                                                                                                                                                                                                                                                                                                                                                                                                                          | 17601823 | 1 | 1 |
| AT1G32240 | KAN2  | KANADI 2                                                                                                                                                                                                       | All kan1 kan2 stem vascular bundles displayed phloem surrounded by xylem, indicating adaxialized polarity.                                                                                                                                                                                                                                                                                                                                                                                                                                                                                                                                                                                                                                                                                                                                                                                                                                                                                                                                                                                                                                                                                                                                                                                                                                                                                                                                    | 17601823 | 1 | 1 |
| AT1G32240 | KAN2  | KANADI 2                                                                                                                                                                                                       | Double mutant plants have narrow leaves and developed ectopic outgrowths on their abaxial lamina.                                                                                                                                                                                                                                                                                                                                                                                                                                                                                                                                                                                                                                                                                                                                                                                                                                                                                                                                                                                                                                                                                                                                                                                                                                                                                                                                             | 17601823 | 1 | 1 |
| AT1G32240 | KAN2  | KANADI 2                                                                                                                                                                                                       | The vasculature in more than half (55.9%) of kan1 kan2 leaf petioles exhibited a pattern of phloem surrounded by xylem, representing an adaxialized phenotype. However, very surprisingly, 17.6% of kan1 kan2 leaf petioles had abaxialized vasculature or a mixture of adaxialized and abaxialized vasculature.                                                                                                                                                                                                                                                                                                                                                                                                                                                                                                                                                                                                                                                                                                                                                                                                                                                                                                                                                                                                                                                                                                                              | 17601823 | 1 | 1 |
| AT1G70070 | ISE2  | EMB25 PDE317                                                                                                                                                                                                   | Embryo-defective phenotypes and lack of plasmodesmata aperture/size-exclusion limit downregulation after the torpedo stage.                                                                                                                                                                                                                                                                                                                                                                                                                                                                                                                                                                                                                                                                                                                                                                                                                                                                                                                                                                                                                                                                                                                                                                                                                                                                                                                   | 17601829 | 1 | 0 |
| AT1G70070 | ISE2  | EMB25 PDE317                                                                                                                                                                                                   | Similar frequency of branched plasmodesmata as in ise2-1.                                                                                                                                                                                                                                                                                                                                                                                                                                                                                                                                                                                                                                                                                                                                                                                                                                                                                                                                                                                                                                                                                                                                                                                                                                                                                                                                                                                     | 17601829 | 1 | 0 |
| AT1G70070 | ISE2  | EMB25 PDE317                                                                                                                                                                                                   | Homozygous embryos have proportionally thicker hypocotyls and smaller cotyledons. However, the general organization of the tissues in the embryonic axis, such as procambial strands, ground tissue, and protodermis, was indistinguishable from that of wild-type embryos described in the literature.                                                                                                                                                                                                                                                                                                                                                                                                                                                                                                                                                                                                                                                                                                                                                                                                                                                                                                                                                                                                                                                                                                                                       | 17601829 | 1 | 1 |
| AT1G70070 | ISE2  | EMB25 PDE317                                                                                                                                                                                                   | Homozygous embryos produce very low levels of chlorophyll.                                                                                                                                                                                                                                                                                                                                                                                                                                                                                                                                                                                                                                                                                                                                                                                                                                                                                                                                                                                                                                                                                                                                                                                                                                                                                                                                                                                    | 17601829 | 1 | 1 |
| AT1G70070 | ISE2  | EMB25 PDE317                                                                                                                                                                                                   | Homozygous embryos were reduced in size compared with wild-type embryos, and their cotyledons were smaller, with irregular borders, pointed tips, and uneven sizes.                                                                                                                                                                                                                                                                                                                                                                                                                                                                                                                                                                                                                                                                                                                                                                                                                                                                                                                                                                                                                                                                                                                                                                                                                                                                           | 17601829 | 1 | 1 |
| AT1G70070 | ISE2  | EMB25 PDE317                                                                                                                                                                                                   | Homozygous mutant embryos develop more slowly compared with wild-type embryos during the later stages of development. Abnormal morphology starts to be evident only after the heart stage.                                                                                                                                                                                                                                                                                                                                                                                                                                                                                                                                                                                                                                                                                                                                                                                                                                                                                                                                                                                                                                                                                                                                                                                                                                                    | 17601829 | 1 | 1 |
| AT1G70070 | ISE2  | EMB25 PDE317                                                                                                                                                                                                   | Homozygous mutant seeds can germinate in vitro on agar plates containing Murashige and Skoog (MS) salt plus 1% sucrose, although the growth/developmental rate of the homozygous seedlings was slower compared with that of wild-type seedlings. Whereas wild-type seedlings displayed fully expanded green cotyledons, true leaves and a well-developed root system by 14 d after germination, homozygous seedlings were much smaller and white or pale green in color. Underdeveloped cotyledons emerged from the homozygous seeds but expanded very slowly and sometimes showed bumpy irregular surfaces and occasional anthocyanin expression. Partial greening was observed in ise2 seedlings only after culture for several weeks. Most of the homozygous seedlings developed leaf-like structures that were translucent and contained trichomes. The aerial portions of the homozygous seedlings generally were stunted and thicker and frequently exhibited callus-like structures after extended periods of culture. Mutant seedlings often form stunted inflorescence shoot- and flower-like organs but normal-looking roots and root hairs. Frequently, multiple short shoots originate from the apical dome of a single original seedling, forming a broccoli-like structure. Homozygous seedlings grown in culture with 1% sucrose are sterile and perish immediately after germinating in soil or on MS medium without sucrose. | 17601829 | 1 | 1 |
| AT1G70070 | ISE2  | EMB25 PDE317                                                                                                                                                                                                   | In all homozygous embryos from late-heart to late-torpedo stages, 15% of their plasmodesmata (PD) exhibited branched morphology, in contrast with the single simple PD observed in wild-type embryos. Branched PD were randomly distributed throughout the whole body of embryos, and no variation in their frequency was observed among late-heart, early-torpedo, and late-torpedo stages.                                                                                                                                                                                                                                                                                                                                                                                                                                                                                                                                                                                                                                                                                                                                                                                                                                                                                                                                                                                                                                                  | 17601829 | 1 | 0 |
| AT1G70070 | ISE2  | EMB25 PDE317                                                                                                                                                                                                   | Mutation is lethal in the homozygous state.                                                                                                                                                                                                                                                                                                                                                                                                                                                                                                                                                                                                                                                                                                                                                                                                                                                                                                                                                                                                                                                                                                                                                                                                                                                                                                                                                                                                   | 17601829 | 1 | 0 |
| AT1G70070 | ISE2  | EMB25 PDE317                                                                                                                                                                                                   | Radicle and the shoot apical meristem (SAM) appeared normal in the homozygous seedlings but were often larger.                                                                                                                                                                                                                                                                                                                                                                                                                                                                                                                                                                                                                                                                                                                                                                                                                                                                                                                                                                                                                                                                                                                                                                                                                                                                                                                                | 17601829 | 1 | 1 |
| AT1G70070 | ISE2  | EMB25 PDE317                                                                                                                                                                                                   | Wild-type and ISE2/ise2 heterozygous embryos remain green as their organs, such as hypocotyls and cotyledons, develop. The corresponding ise2 embryos (from the same silique) were white by light microscopy and never turned green even at later stages.                                                                                                                                                                                                                                                                                                                                                                                                                                                                                                                                                                                                                                                                                                                                                                                                                                                                                                                                                                                                                                                                                                                                                                                     | 17601829 | 1 | 1 |
| AT1G06040 | STO   | B-box domain protein 24 BBX24 SALT TOLERANCE                                                                                                                                                                   | shorter hypocotyl under Rc, Frc, Bc, and larger cotyledon area than wt/increased anthocyanin accumulation under Frc and Bc.                                                                                                                                                                                                                                                                                                                                                                                                                                                                                                                                                                                                                                                                                                                                                                                                                                                                                                                                                                                                                                                                                                                                                                                                                                                                                                                   | 17605755 | 1 | 1 |
| AT1G02880 | TPK1  | Thiamin pyrophosphokinase1                                                                                                                                                                                     | The AtTPK1-KO single mutant does not have any obvious aberrant phenotypes, but, the AtTPK1-KO /AtTPK2-KO double mutant demonstrates that these enzymes are required to produce thiamine pyrophosphate from thiamine.                                                                                                                                                                                                                                                                                                                                                                                                                                                                                                                                                                                                                                                                                                                                                                                                                                                                                                                                                                                                                                                                                                                                                                                                                          | 17611796 | 1 | 0 |
| AT1G02880 | TPK1  | Thiamin pyrophosphokinase1                                                                                                                                                                                     | These double knock-out mutants are thiamine auxotrophs that have a seedling lethal phenotype unless they are supplied with exogenous thiamine pyrophosphate (TPP) through a spray-based application. In addition, these mutants have 2-fold higher levels of thiamine and 32-fold lower levels of TPP than wild type plants.                                                                                                                                                                                                                                                                                                                                                                                                                                                                                                                                                                                                                                                                                                                                                                                                                                                                                                                                                                                                                                                                                                                  | 17611796 | 1 | 1 |
| AT1G09340 | CRB   | CHLOROPLAST RNA BINDING chloroplast RNA binding CRUCIFERIN B CSP41B HIF1.3                                                                                                                                     | Smaller and paler than wild-type plants. Reduction in both chlorophyll a and chlorophyll b. Impaired photosynthesis.                                                                                                                                                                                                                                                                                                                                                                                                                                                                                                                                                                                                                                                                                                                                                                                                                                                                                                                                                                                                                                                                                                                                                                                                                                                                                                                          | 17617174 | 3 | 3 |
| AT1G09330 | ECH   | ECHIDNA                                                                                                                                                                                                        | Smaller and paler than wild-type plants. Reduction in both chlorophyll a and chlorophyll b. Impaired photosynthesis.                                                                                                                                                                                                                                                                                                                                                                                                                                                                                                                                                                                                                                                                                                                                                                                                                                                                                                                                                                                                                                                                                                                                                                                                                                                                                                                          | 17617174 | 3 | 3 |
| AT2G05210 | POT1A | POT1                                                                                                                                                                                                           | Telomeres in wild-type siblings appeared as a homogeneous smear of products ranging from 1.6 to 4.5 kb. Telomere tracts in pot1-1 were much shorter than in wild-type and showed a more discrete banding pattern.                                                                                                                                                                                                                                                                                                                                                                                                                                                                                                                                                                                                                                                                                                                                                                                                                                                                                                                                                                                                                                                                                                                                                                                                                             | 17627276 | 1 | 1 |
| AT2G05210 | POT1A | POT1                                                                                                                                                                                                           | The fate of telomeres in pot1 mutants was followed for several plant generations and it was found that telomere length in pot1-1 decreased progressively with each generation. The ever-shorter-telomere phenotype and sharp TRF banding profile were strikingly similar to the phenotype associated with tert mutants, which lose 200-500 bp of telomeric DNA per plant generation.                                                                                                                                                                                                                                                                                                                                                                                                                                                                                                                                                                                                                                                                                                                                                                                                                                                                                                                                                                                                                                                          | 17627276 | 1 | 1 |
| AT2G05210 | POT1A | POT1                                                                                                                                                                                                           | The mutants failed to elongate their telomeres, and exhibited a heterogeneous profile of TRF products similar to that seen in ku70 tert.                                                                                                                                                                                                                                                                                                                                                                                                                                                                                                                                                                                                                                                                                                                                                                                                                                                                                                                                                                                                                                                                                                                                                                                                                                                                                                      | 17627276 | 1 | 1 |
| AT2G05210 | POT1A | POT1                                                                                                                                                                                                           | Same degree of telomere shortening as in the pot1 ku70 and ku70 tert double mutants.                                                                                                                                                                                                                                                                                                                                                                                                                                                                                                                                                                                                                                                                                                                                                                                                                                                                                                                                                                                                                                                                                                                                                                                                                                                                                                                                                          | 17627276 | 1 | 1 |
| AT2G05210 | POT1A | POT1                                                                                                                                                                                                           | Telomeres in the double mutants shortened at the same rate as in either single mutant.                                                                                                                                                                                                                                                                                                                                                                                                                                                                                                                                                                                                                                                                                                                                                                                                                                                                                                                                                                                                                                                                                                                                                                                                                                                                                                                                                        | 17627276 | 1 | 1 |
| AT2G05210 | POT1A | POT1                                                                                                                                                                                                           | Telomeres of the same length and sharp banding profile were found in the double mutant, as in their tert and pot1-1 siblings.                                                                                                                                                                                                                                                                                                                                                                                                                                                                                                                                                                                                                                                                                                                                                                                                                                                                                                                                                                                                                                                                                                                                                                                                                                                                                                                 | 17627276 | 1 | 1 |
| AT2G05210 | POT1A | POT1                                                                                                                                                                                                           | Telomeres in wild-type siblings appeared as a homogeneous smear of products ranging from 1.6 to 4.5 kb. Telomeres were significantly shorter in pot1-2 than in wild-type, or even pot1-1.                                                                                                                                                                                                                                                                                                                                                                                                                                                                                                                                                                                                                                                                                                                                                                                                                                                                                                                                                                                                                                                                                                                                                                                                                                                     | 17627276 | 1 | 1 |

|           |           |                                                                                          |                                                                                                                                                                                                                                                                                                                                                                                                                                                                                                                            |          |   |   |
|-----------|-----------|------------------------------------------------------------------------------------------|----------------------------------------------------------------------------------------------------------------------------------------------------------------------------------------------------------------------------------------------------------------------------------------------------------------------------------------------------------------------------------------------------------------------------------------------------------------------------------------------------------------------------|----------|---|---|
| AT1G16970 | KU70      |                                                                                          | In contrast to the ku70 mutant, which undergo telomerase-dependent expansion to more than twice the normal length in a single generation, the ku70 tert double mutant displays accelerated telomere shortening and a precocious onset of genome stability.                                                                                                                                                                                                                                                                 | 17627276 | 1 | 1 |
| AT1G16970 | KU70      |                                                                                          | The mutants failed to elongate their telomeres, and exhibited a heterogeneous profile of TRF products similar to that seen in ku70 tert.                                                                                                                                                                                                                                                                                                                                                                                   | 17627276 | 1 | 1 |
| AT1G16970 | KU70      |                                                                                          | Same degree of telomere shortening as in the pot1 ku70 and ku70 tert double mutants.                                                                                                                                                                                                                                                                                                                                                                                                                                       | 17627276 | 1 | 1 |
| AT1G73180 | AT1G73180 | T18K17.15; T18K17.15                                                                     | The bns-2 mutant has defects in inflorescence development.                                                                                                                                                                                                                                                                                                                                                                                                                                                                 | 17627280 | 1 | 1 |
| AT1G73177 | BNS       | anaphase-promoting complex 13 APC13 BONSAL                                               | The bns-2 mutant has defects in inflorescence development.                                                                                                                                                                                                                                                                                                                                                                                                                                                                 | 17627280 | 1 | 1 |
| AT1G26810 | GALT1     | B3GALT15                                                                                 | In contrast with wild-type plants, no Lea-containing peaks were found in extracts of the mutant.                                                                                                                                                                                                                                                                                                                                                                                                                           | 17630273 | 1 | 1 |
| AT1G26810 | GALT1     | B3GALT15                                                                                 | Mutant lines did not display a detectable signal with JIM84 (a monoclonal antibody specifically binding to Lea structures on plant N-glycans), whereas, in wild-type plants, a strong staining was visible.                                                                                                                                                                                                                                                                                                                | 17630273 | 1 | 1 |
| AT1G77110 | PIN6      | PIN-FORMED 6                                                                             | shorter visible lateral roots at 9 days after germination. The proximal region of each lateral root in the mutant is significantly swollen and often bent. Growth and morphology of the primary root of the puchi mutant is normal.                                                                                                                                                                                                                                                                                        | 17630277 | 3 | 1 |
| AT1G05180 | AXR1      | AUXIN RESISTANT 1; AUXIN RESISTANT PROTEIN 1; YUPSH12.21; YUPSH12.21                     | Homozygous axr1-12 plants that are heterozygous for axl-1 display severe growth defects. These seedlings developed short, slow growing roots compared with wild-type roots, and were arrested at the late seedling stage.                                                                                                                                                                                                                                                                                                  | 17655650 | 1 | 1 |
| AT1G05180 | AXR1      | AUXIN RESISTANT 1; AUXIN RESISTANT PROTEIN 1; YUPSH12.21; YUPSH12.21                     | Plants with the genotype AXL/axl-1 axr1-12/axr1-12 had a slight but consistent reduction in RUB-CUL1 levels.                                                                                                                                                                                                                                                                                                                                                                                                               | 17655650 | 1 | 1 |
| AT1G05180 | AXR1      | AUXIN RESISTANT 1; AUXIN RESISTANT PROTEIN 1; YUPSH12.21; YUPSH12.21                     | The axr1-12/axr1-12 AXL/axl-1 line are nearly completely resistant to auxin, a much more severe phenotype than for axr1-12 alone.                                                                                                                                                                                                                                                                                                                                                                                          | 17655650 | 1 | 1 |
| AT1G05180 | AXR1      | AUXIN RESISTANT 1; AUXIN RESISTANT PROTEIN 1; YUPSH12.21; YUPSH12.21                     | The columella of AXL/axl-1 axr1-12/axr1-12 root tips is highly disorganized during early seedling root growth, and is completely disrupted at the time when root growth ceases.                                                                                                                                                                                                                                                                                                                                            | 17655650 | 1 | 1 |
| AT1G05180 | AXR1      | AUXIN RESISTANT 1; AUXIN RESISTANT PROTEIN 1; YUPSH12.21; YUPSH12.21                     | Reduced RUB modification of CUL1.                                                                                                                                                                                                                                                                                                                                                                                                                                                                                          | 17655650 | 1 | 0 |
| AT1G05180 | AXR1      | AUXIN RESISTANT 1; AUXIN RESISTANT PROTEIN 1; YUPSH12.21; YUPSH12.21                     | Slight decrease in the number of columella columns in axr1-12 seedlings compared with wild type.                                                                                                                                                                                                                                                                                                                                                                                                                           | 17655650 | 1 | 1 |
| AT1G05180 | AXR1      | AUXIN RESISTANT 1; AUXIN RESISTANT PROTEIN 1; YUPSH12.21; YUPSH12.21                     | The mutant is resistant to auxin.                                                                                                                                                                                                                                                                                                                                                                                                                                                                                          | 17655650 | 1 | 0 |
| AT1G05180 | AXR1      | AUXIN RESISTANT 1; AUXIN RESISTANT PROTEIN 1; YUPSH12.21; YUPSH12.21                     | Double homozygous mutant seedlings are completely deficient in RUB-modified CUL1.                                                                                                                                                                                                                                                                                                                                                                                                                                          | 17655650 | 1 | 1 |
| AT1G05180 | AXR1      | AUXIN RESISTANT 1; AUXIN RESISTANT PROTEIN 1; YUPSH12.21; YUPSH12.21                     | Double homozygous progeny has severe growth and developmental defects. The phenotype of these plants resembled the bdl/ial2 and mp/arf5 mutants. These seedlings did not segregate at the expected 1/16 ratio. Instead, we identified three double mutant seedlings in 176 F2 plants, suggesting the homozygous double mutants are arrested during embryogenesis.                                                                                                                                                          | 17655650 | 1 | 1 |
| AT1G05180 | AXR1      | AUXIN RESISTANT 1; AUXIN RESISTANT PROTEIN 1; YUPSH12.21; YUPSH12.21                     | In the double mutant progeny, great reduction in vascular development.                                                                                                                                                                                                                                                                                                                                                                                                                                                     | 17655650 | 1 | 0 |
| AT1G05180 | AXR1      | AUXIN RESISTANT 1; AUXIN RESISTANT PROTEIN 1; YUPSH12.21; YUPSH12.21                     | The AXR1/axr1-12, axl-1/axl-1 plants were similar to wild type with respect to overall morphology and fertility.                                                                                                                                                                                                                                                                                                                                                                                                           | 17655650 | 1 | 1 |
| AT1G05180 | AXR1      | AUXIN RESISTANT 1; AUXIN RESISTANT PROTEIN 1; YUPSH12.21; YUPSH12.21                     | The double homozygous progeny is seedling lethal.                                                                                                                                                                                                                                                                                                                                                                                                                                                                          | 17655650 | 1 | 1 |
| AT1G05180 | AXR1      | AUXIN RESISTANT 1; AUXIN RESISTANT PROTEIN 1; YUPSH12.21; YUPSH12.21                     | Very strong embryo defects were observed in homozygous axl-1 plants segregating the axr1-12 mutation.                                                                                                                                                                                                                                                                                                                                                                                                                      | 17655650 | 1 | 1 |
| AT1G64780 | AMT1-2    |                                                                                          | The amt1:2-1 mutant appears to grow normally on media with different levels of ammonium or ammonium nitrate, but, seems slightly more resistant to methylammonium that wild type seedlings. High affinity ammonium uptake is reduced in the roots of amt1:2-2 mutants. There is no change in the level of AMT1:1, AMT1:3, or AMT2:1 transcripts for these mutants relative to wild type in low or high nitrogen conditions.                                                                                                | 17693533 | 1 | 1 |
| AT1G64780 | AMT1-2    |                                                                                          | The amt1:2-2 mutant appears to grow normally on media with different levels of ammonium or ammonium nitrate, but, seems slightly more resistant to methylammonium that wild type seedlings. High affinity ammonium uptake is reduced in the roots of amt1:2-2 mutants. There is no change in the level of AMT1:1, AMT1:3, or AMT2:1 transcripts for these mutants relative to wild type in low or high nitrogen conditions.                                                                                                | 17693533 | 1 | 1 |
| AT1G50030 | TOR       | TarGeT of rapamycin                                                                      | larger plants, more resistant to stress                                                                                                                                                                                                                                                                                                                                                                                                                                                                                    | 17721444 | 1 | 1 |
| AT1G67370 | ASY1      | ASYNAPTIC 1; ATASY1; FIN21.19                                                            | The chromosome fragmentation phenotype of the asy1/ Atrads51 double mutant is indistinguishable from that of the Atrads51 mutant.                                                                                                                                                                                                                                                                                                                                                                                          | 17785529 | 1 | 1 |
| AT1G67370 | ASY1      | ASYNAPTIC 1; ATASY1; FIN21.19                                                            | Mutant lines showed identical asynaptic and chiasma frequency phenotypes.                                                                                                                                                                                                                                                                                                                                                                                                                                                  | 17785529 | 1 | 1 |
| AT1G67230 | CRWN1     | KAKU2 LINC1                                                                              | Nuclei are significantly smaller than wild-type nuclei.                                                                                                                                                                                                                                                                                                                                                                                                                                                                    | 17873096 | 1 | 1 |
| AT1G67230 | CRWN1     | KAKU2 LINC1                                                                              | Epidermal cells are approximately one-fourth the size of wild-type epidermal cells. Whole plant is dwarfed with respect to wild-type and single mutant siblings in segregating F2 family. Spindle-shaped nuclei are almost entirely absent. Number of chromocenters in double mutant nuclei is half that of wild type nuclei. Nuclear DNA packaging density is increased with respect to wild type.                                                                                                                        | 17873096 | 1 | 1 |
| AT1G13220 | LINC2     | CROWDED NUCLEI 2 CRWN2 LITTLE NUCLEI2                                                    | Nuclei are significantly smaller than wild-type nuclei.                                                                                                                                                                                                                                                                                                                                                                                                                                                                    | 17873096 | 1 | 1 |
| AT1G13220 | LINC2     | CROWDED NUCLEI 2 CRWN2 LITTLE NUCLEI2                                                    | Epidermal cells are approximately one-fourth the size of wild-type epidermal cells. Whole plant is dwarfed with respect to wild-type and single mutant siblings in segregating F2 family. Spindle-shaped nuclei are almost entirely absent. Number of chromocenters in double mutant nuclei is half that of wild type nuclei. Nuclear DNA packaging density is increased with respect to wild type.                                                                                                                        | 17873096 | 1 | 1 |
| AT1G08430 | ALMT1     |                                                                                          | The mutant exhibits very low levels of root growth and malate release in the presence of AI (0.2 nmol plant <sup>-1</sup> 24 h <sup>-1</sup> ).                                                                                                                                                                                                                                                                                                                                                                            | 17885092 | 1 | 1 |
| AT1G76490 |           |                                                                                          | The hmg1 mutant has reduced levels of sterols compared to wild-type plants, but, its sterol composition is normal. It also has about a 65% drop in triterpenoid levels compared to wild-type plants.                                                                                                                                                                                                                                                                                                                       | 17917299 |   |   |
| AT1G62830 | LDL1      | SWP1                                                                                     | Late flowering. Flowers later than flc3 single mutant but earlier than ld11/ld12 double mutant.                                                                                                                                                                                                                                                                                                                                                                                                                            | 17921315 | 1 | 1 |
| AT1G30270 | CIPK23    | ATCIPK23 LKS1 LOW-K <sup>+</sup> -SENSITIVE 1 PK317 SRRK3.23 SOS2-like protein kinase 17 | Enhanced drought tolerance. Hypersensitive to ABA inhibition of light-induced stomatal opening. Loss of function of CIPK23 alters the ABA responsiveness of guard cells during their opening and closure, leading to reduced water loss under drought conditions. When grown on media containing low levels of KCl (micromolar range), cipk23 mutants displayed drastically reduced stature compared to the wild-type. In particular, the roots of mutant plants were significantly shorter than those of wildtype plants. | 17922773 | 2 | 1 |
| AT2G04240 | XERICO    |                                                                                          | Resistant to exogenous ABA. Seeds contained lower amounts of endogenous ABA than wildtype.                                                                                                                                                                                                                                                                                                                                                                                                                                 | 17933900 | 1 | 1 |
| AT1G51190 | PLT2      | AILL4                                                                                    | Rootless. Embryonic root differentiates 3 days after germination. Adventitious roots arrest 6 days after germination.                                                                                                                                                                                                                                                                                                                                                                                                      | 17960244 | 1 | 1 |
| AT1G74900 | OTP43     | P2544.13; P2544.13; organelle transcript processing defect 43                            | Segregates 25% embryo lethal. Leaves abnormally shaped (serrated).                                                                                                                                                                                                                                                                                                                                                                                                                                                         | 17965268 | 1 | 0 |
| AT1G63990 | SP011-2   | sporulation 11-2                                                                         | The first meiotic division of pollen mother cells because the homologs neither pair nor form SCs due to the lack of initial DSB formation                                                                                                                                                                                                                                                                                                                                                                                  | 17965269 | 1 | 1 |
| AT1G63990 | SP011-2   | sporulation 11-2                                                                         | Anthers were shorter and aged earlier. Chromosome segregation is severely disturbed.                                                                                                                                                                                                                                                                                                                                                                                                                                       | 17965269 | 2 | 2 |
| AT1G20900 | AHL27     | ESC ORE7                                                                                 | Delayed leaf senescence, slightly shorter petioles, round and enlarged leaves, an increased number of inflorescences, a late flowering phenotype and increased biomass.                                                                                                                                                                                                                                                                                                                                                    | 17971039 | 5 |   |
| AT1G64520 | RPN12A    |                                                                                          | The rpn12a-1 mutant has defects in ubiquitin-mediated proteolysis via the 26S proteasome, rendering it more sensitive to misfolded proteins that are degraded in a 26S-proteasome / Ub-dependent manner. However, it has increased levels of the 20S core particle of the proteasome, and exhibits reduced sensitivity to oxidative stress, presumably since oxidatively damaged proteins can be degraded in a 20S proteasome-dependent, but 26S proteasome /Ub-independent manner.                                        | 17971041 | 2 | 1 |
| AT1G01610 | GPAT4     |                                                                                          | This double knock-out mutant has a 60-70% overall decrease in cutin monomer content in leaf and stem. The plant grew slowly. The water loss rate for rosettes was 4-fold greater than wild type. The mutant has an increased sensitivity to fungal pathogen. Defects in stomata structure.                                                                                                                                                                                                                                 | 17991776 | 2 | 0 |
| AT1G10930 | RECQL4A   | RECQ4A RQL4A SGS1                                                                        | sensitive to methylmethanesulfonate and cis-platin and showed an enhanced homologous recombination level                                                                                                                                                                                                                                                                                                                                                                                                                   | 18000056 | 2 | 0 |

|           |         |                                                                                                                                  |                                                                                                                                                                                                                                                                                                                                                                                                                                                                                                                                                                                                                     |          |   |   |
|-----------|---------|----------------------------------------------------------------------------------------------------------------------------------|---------------------------------------------------------------------------------------------------------------------------------------------------------------------------------------------------------------------------------------------------------------------------------------------------------------------------------------------------------------------------------------------------------------------------------------------------------------------------------------------------------------------------------------------------------------------------------------------------------------------|----------|---|---|
| AT1G10130 | ECA3    | ARABIDOPSIS THALIANA ER-TYPE CA2+-ATPASE 3; ATECA3; endoplasmic reticulum-type calcium-transporting ATPase 3; T2711.16; T2711_16 | Shoot and root growth is strongly retarded when plants are grown in the absence of Mn. Also shows delayed growth when grown in the absence of Ca.                                                                                                                                                                                                                                                                                                                                                                                                                                                                   | 18024560 | 2 | 2 |
| AT1G10920 |         |                                                                                                                                  | Reduced sensitivity to victorin.                                                                                                                                                                                                                                                                                                                                                                                                                                                                                                                                                                                    | 18052878 |   |   |
| AT1G17580 | XI-1    | MYA1                                                                                                                             | There are no obvious defects in the aerial tissues, roots, or root hairs of xi-1 mutant plants grown under normal conditions. There are also no obvious defects in organelle trafficking, except for a slight effect on peroxisome movement. Double mutant analysis reveals a greater role for XI-1 in organelle movement and plant development (see xik-2/xi-1).                                                                                                                                                                                                                                                   | 18178669 | 1 | 1 |
| AT1G04160 | XIB     | ATXIB MYOSIN XI B myosin XI B MYOSIN XI-8 XI-8 XI-B                                                                              | There are no obvious defects in the aerial tissues, roots, or root hairs of xi-b mutant plants grown under normal conditions. There are also no obvious defects in organelle trafficking. Double mutant analysis reveals a role for xi-b in root hair elongation (see xi-2/xi-b).                                                                                                                                                                                                                                                                                                                                   | 18178669 | 1 | 1 |
| AT1G04160 | XIB     | ATXIB MYOSIN XI B myosin XI B MYOSIN XI-8 XI-8 XI-B                                                                              | There are no obvious defects in the aerial tissues, roots, or root hairs of xi-b mutant plants grown under normal conditions. There are also no obvious defects in organelle trafficking. Double mutant analysis reveals a role for xi-b in root hair elongation (see xi-2/xi-b).                                                                                                                                                                                                                                                                                                                                   | 18178669 | 1 | 1 |
| AT1G20090 | ROP2    | Arabidopsis RAC-like 4; ARAC4; ATRAC4; ATROP2; GTP-BINDING PROTEIN ARAC4; RHO-related protein from plants 2; T20H2.12; T20H2_12  | stomata open faster and the extent of aperture increase is larger in response to light                                                                                                                                                                                                                                                                                                                                                                                                                                                                                                                              | 18178769 | 1 | 1 |
| AT1G01220 | FKGP    | ATFKGP GDP-L-fucose pyrophosphorylase L-fucokinase                                                                               | fkgp-1 mutants have about 40 times more L-fucose than wild type Arabidopsis plants, but the levels of other monosaccharides do not appear to differ significantly in the mutants. No obvious phenotypic abnormalities were observed in the fkgp-1 mutants, nor were any differences in the sugar composition of cell wall polysaccharides detected.                                                                                                                                                                                                                                                                 | 18199744 | 1 | 0 |
| AT1G04520 | CRRSP3  |                                                                                                                                  | The movement of GFP between cells is increased in this double mutant.                                                                                                                                                                                                                                                                                                                                                                                                                                                                                                                                               | 18215111 | 1 | 1 |
| AT2G13560 | NAD-ME1 |                                                                                                                                  | The nad-me1.1 mutants appear to grow and develop normally and display normal photosynthetic behavior, however, the plants have a significant reduction in NAD-dependent malic enzyme activity.                                                                                                                                                                                                                                                                                                                                                                                                                      | 18223148 |   |   |
| AT2G13560 | NAD-ME1 |                                                                                                                                  | The nad-me1.1 / nad-me2.1 double mutant has no detectable NAD-dependent malic enzyme activity. However, it appears to grow and develop normally and to have normal photosynthetic parameters. However, the levels of several metabolites, including fructose, galactose, sucrose, 2-oxoglutarate, succinate, fumarate, citrate, and several amino acids are altered in these double mutants relative to wild type plants. The metabolites affected differ depending on whether the analyses are done at the end of the day or end of the night.                                                                     | 18223148 |   |   |
| AT1G73660 | SIS8    | AT6                                                                                                                              | Increased tolerance of salt stress. Seedlings germinate in the presence of high concentrations of NaCl.                                                                                                                                                                                                                                                                                                                                                                                                                                                                                                             | 18299802 | 1 | 1 |
| AT1G80330 | GA30X4  |                                                                                                                                  | Dwarf phenotype, early flowers are sterile while late flowers are fertile. Reduced silique length.                                                                                                                                                                                                                                                                                                                                                                                                                                                                                                                  | 18310462 | 1 | 1 |
| AT1G80325 |         |                                                                                                                                  | Dwarf phenotype, early flowers are sterile while late flowers are fertile. Reduced silique length.                                                                                                                                                                                                                                                                                                                                                                                                                                                                                                                  | 18310462 | 1 | 1 |
| AT1G15550 | GA30X1  | GA4                                                                                                                              | Dwarf phenotype, early flowers are sterile while late flowers are fertile. Reduced silique length.                                                                                                                                                                                                                                                                                                                                                                                                                                                                                                                  | 18310462 | 1 | 1 |
| AT2G14560 | LURP1   |                                                                                                                                  | Compromised in RPP4-mediated resistance. Mutants allow increased growth of Hyaloperonospora parasitica hyphae frequently surrounded by a trail of necrotic plant cells.                                                                                                                                                                                                                                                                                                                                                                                                                                             | 18346188 | 1 | 0 |
| AT1G65360 | AGL23   | AT1G65360, AGAMOUS-like 23, T8F5.14, T8F5_14                                                                                     | arrest in embryo sac development; albino due to absence of chloroplast                                                                                                                                                                                                                                                                                                                                                                                                                                                                                                                                              | 18346189 | 1 | 1 |
| AT1G66340 | ETR1    |                                                                                                                                  | Increased number of lateral roots. Reduced acropetal auxin transport.                                                                                                                                                                                                                                                                                                                                                                                                                                                                                                                                               | 18363780 | 1 | 1 |
| AT1G69935 | SHW1    |                                                                                                                                  | Dark grown seedlings have shorter hypocotyls and reduced apical hook curvature. In white light, mutants have shorter hypocotyls indicating an enhanced inhibition of hypocotyl elongation. Late flowering in long days. Reduced chlorophyll accumulation.                                                                                                                                                                                                                                                                                                                                                           | 18375596 | 4 | 4 |
| AT1G15820 | LHCb6   | AT1G05207                                                                                                                        | retarded growth, reduced NPQ amplitude, limited electron transport rate                                                                                                                                                                                                                                                                                                                                                                                                                                                                                                                                             | 18381925 | 1 | 1 |
| AT1G05560 | UGT75B1 | UDP-GLUCOSE TRANSFERASE 1 UDP-GLUCOSYLTRANSFERASE UDP-Glucosyltransferase 75B1 UGT1                                              | Extracts from mutant leaves, flowers, and siliques show a 95% reduction in p-acetylglucosyltransferase activity relative to wild type extracts, and p-ABA-glucose formation is severely diminished when assayed in a radiotracer feeding experiment using mutant and wild type leaves. Though the ratio of glucosylated to non-glucosylated pABA is much lower in mutant plants, they have comparable levels of total pABA.                                                                                                                                                                                         | 18385129 | 1 | 0 |
| AT1G70510 | KNAT2   | ARABIDOPSIS THALIANA KN 1 ATK1                                                                                                   | bpv phenotype                                                                                                                                                                                                                                                                                                                                                                                                                                                                                                                                                                                                       | 18390591 | 1 | 1 |
| AT1G70510 | KNAT2   | ARABIDOPSIS THALIANA KN 1 ATK1                                                                                                   | Similar to bp single mutants.                                                                                                                                                                                                                                                                                                                                                                                                                                                                                                                                                                                       | 18390591 | 1 | 1 |
| AT1G70510 | KNAT2   | ARABIDOPSIS THALIANA KN 1 ATK1                                                                                                   | Similar to bp;pnv double mutant.                                                                                                                                                                                                                                                                                                                                                                                                                                                                                                                                                                                    | 18390591 | 1 | 1 |
| AT1G70510 | KNAT2   | ARABIDOPSIS THALIANA KN 1 ATK1                                                                                                   | Fully rescues downward orientation of siliques characteristic of bp single mutants. Shorter than WT. Rescues partial loss of apical dominance characteristic of single bp mutants. Partial rescue of primary inflorescence internode length characteristic of bp single mutants.                                                                                                                                                                                                                                                                                                                                    | 18390591 | 1 | 1 |
| AT1G70510 | KNAT2   | ARABIDOPSIS THALIANA KN 1 ATK1                                                                                                   | Similar to knat6;bp;pnv except hta shows greater suppression on bp pny silique orientation defects.                                                                                                                                                                                                                                                                                                                                                                                                                                                                                                                 | 18390591 | 1 | 1 |
| AT1G23380 | KNAT6   |                                                                                                                                  | Partially rescues the downward orientation of siliques characteristic of bp single mutants. Rescues partial loss of apical dominance phenotype characteristic of bp mutants. Short plants, although taller than bp single mutants. Partial rescue of primary inflorescence stem internode length characteristic of bp single mutants.                                                                                                                                                                                                                                                                               | 18390591 | 4 | 4 |
| AT1G23380 | KNAT6   |                                                                                                                                  | Partially suppresses pny;bp phenotypes such as dwarfism, loss of apical dominance and silique orientation.                                                                                                                                                                                                                                                                                                                                                                                                                                                                                                          | 18390591 | 1 | 1 |
| AT1G23380 | KNAT6   |                                                                                                                                  | Fully rescues downward orientation of siliques characteristic of bp single mutants. Shorter than WT. Rescues partial loss of apical dominance characteristic of single bp mutants. Partial rescue of primary inflorescence internode length characteristic of bp single mutants.                                                                                                                                                                                                                                                                                                                                    | 18390591 | 3 | 3 |
| AT1G23380 | KNAT6   |                                                                                                                                  | Similar to knat6;bp;pnv except hta shows greater suppression on bp pny silique orientation defects.                                                                                                                                                                                                                                                                                                                                                                                                                                                                                                                 | 18390591 | 1 | 1 |
| AT1G23380 | KNAT6   |                                                                                                                                  | WT                                                                                                                                                                                                                                                                                                                                                                                                                                                                                                                                                                                                                  | 18390591 | 1 | 1 |
| AT1G72330 | ALAAT2  | AOAT3                                                                                                                            | slightly retarded. Leaves contained undegraded starch at the end of night.                                                                                                                                                                                                                                                                                                                                                                                                                                                                                                                                          | 18390594 | 1 | 1 |
| AT1G43850 | SEU     |                                                                                                                                  | Resembles seu-1 single mutant with reduced stamen number.                                                                                                                                                                                                                                                                                                                                                                                                                                                                                                                                                           | 18390806 | 1 | 1 |
| AT1G70560 | TAA1    | CKRC1 SAV3 TIR2 WE18                                                                                                             | These mutants have shorter hypocotyls than wild-type plants when grown in low R:FR ratio light. sav3-1 mutants are shorter and have reduced leaf hyponasty compared to wild type plants when both are subjected to supplementary far red light. Shade-induced expression of IAA19 and IAA29 is reduced in this mutant compared to wild-type plants.                                                                                                                                                                                                                                                                 | 18394996 | 3 | 3 |
| AT1G70560 | TAA1    | CKRC1 SAV3 TIR2 WE18                                                                                                             | These mutants have shorter hypocotyls, shorter petioles, and more leaf area than wild-type plants when grown in low R:FR ratio light. They mutants have 60% of the free auxin normally found in wild-type mutants with a marked reduction in IAA synthesis rate under shade conditions. Microarray experiments indicate that following shade treatment, the sav3-2 mutant has 66 genes that are expressed at a lower level than in WT plants. Shade-induced expression of IAA19 and IAA29 is reduced in this mutant compared to wild-type plants, but the wild-type expression level can be restored with 1 uM IAA. | 18394996 | 4 | 4 |
| AT1G70560 | TAA1    | CKRC1 SAV3 TIR2 WE18                                                                                                             | These mutants have shorter hypocotyls than wild-type plants when grown in low R:FR ratio light. Shade-induced expression of IAA19 and IAA29 is reduced in this mutant compared to wild-type plants.                                                                                                                                                                                                                                                                                                                                                                                                                 | 18394996 | 2 | 2 |
| AT1G70560 | TAA1    | CKRC1 SAV3 TIR2 WE18                                                                                                             | The hypocotyl of this mutant responds normally to ACC when grown in the dark, but, its roots are moderately less sensitive to ACC than wild type seedlings grown under the same conditions. This difference in sensitivity can be eliminated when the mutants are treated with ACC and low levels of IAA. wei8-1 and wild type hypocotyls and roots respond similarly to IAA in the absence of ACC. The roots of wei8-1 mutant seedlings do not display proper gravitropism. High-temperature mediated hypocotyl elongation is reduced by ~25% in these mutants compared to wild-type seedlings.                    | 18394997 |   |   |
| AT1G70560 | TAA1    | CKRC1 SAV3 TIR2 WE18                                                                                                             | These triple mutants do not make a primary root, they have an extremely reduced hypocotyl, and they lack discernible vasculature in their cotyledons. These mutants have a higher propensity to develop a single cotyledon than wild-type embryos.                                                                                                                                                                                                                                                                                                                                                                  | 18394997 |   |   |

|           |         |                                                                            |                                                                                                                                                                                                                                                                                                                                                                                                                                                                                                                                                                                                                                                                                                                                                                                                                                   |          |    |   |
|-----------|---------|----------------------------------------------------------------------------|-----------------------------------------------------------------------------------------------------------------------------------------------------------------------------------------------------------------------------------------------------------------------------------------------------------------------------------------------------------------------------------------------------------------------------------------------------------------------------------------------------------------------------------------------------------------------------------------------------------------------------------------------------------------------------------------------------------------------------------------------------------------------------------------------------------------------------------|----------|----|---|
| AT1G70560 | TAA1    | CKRC1 SAV3 TIR2 WE18                                                       | The roots of this mutant show almost no sensitivity to the ethylene precursor ACC, but sensitivity is largely restored by the addition of low levels of IAA (but not tryptophan). ACC-triggered dark-grown apical hook formation is also compromised in this mutant, and it is not restored by the addition of IAA. Root gravitropism is more disrupted in this double mutant than in either single mutant. The mutant plants are shorter than wild type, have reduced venation in their leaves, exhibit reduced apical dominance, and produce abnormal flowers. DR5:GUS expression is also diminished in these double mutants, consistent with a ~50% reduction in IAA levels in these mutants. Root meristematic cells differentiate in this mutant, leading to a loss of the stem cell niche and the cessation of root growth. | 18394997 |    |   |
| AT1G70560 | TAA1    | CKRC1 SAV3 TIR2 WE18                                                       | ACC-triggered dark-grown apical hook formation is compromised in this mutant. Root meristematic cells differentiate in this mutant, leading to a loss of the stem cell niche and the cessation of root growth. This mutant also lacks valves in the gynoecia.                                                                                                                                                                                                                                                                                                                                                                                                                                                                                                                                                                     | 18394997 |    |   |
| AT1G70560 | TAA1    | CKRC1 SAV3 TIR2 WE18                                                       | The hypocotyl of this mutant responds normally to ACC when grown in the dark, but, its roots are moderately less sensitive to ACC than wild type seedlings grown under the same conditions. This difference in sensitivity can be eliminated when the mutants are treated with ACC and low levels of IAA. wei8-2 and wild type hypocotyls and roots respond similarly to IAA in the absence of ACC.                                                                                                                                                                                                                                                                                                                                                                                                                               | 18394997 |    |   |
| AT1G23320 | TAR1    |                                                                            | This mutant does not have any obvious morphological defects and it responds normally to ACC and IAA in hypocotyl and root elongation assays.                                                                                                                                                                                                                                                                                                                                                                                                                                                                                                                                                                                                                                                                                      | 18394997 |    |   |
| AT1G23320 | TAR1    |                                                                            | These triple mutants do not make a primary root, they have an extremely reduced hypocotyl, and they lack discernible vasculature in their cotyledons. These mutants have a higher propensity to develop a single cotyledon than wild-type embryos.                                                                                                                                                                                                                                                                                                                                                                                                                                                                                                                                                                                | 18394997 |    |   |
| AT1G61120 | GES     | LIS TPS04                                                                  | These mutants fail to accumulate (E,E)-geranylinalool and 4,8,12-trimethyltrideca-1,3,7,11-tetraene (TMT) in response to a treatment with the octadecanoid mimic coronalon.                                                                                                                                                                                                                                                                                                                                                                                                                                                                                                                                                                                                                                                       | 18398052 | 1  | 1 |
| AT1G09340 | CRB     | CHLOROPLAST RNA BINDING chloroplast RNA binding CRUCIFERIN B CSP41B HIP1.3 | Pale green seedlings, short shoots, short siliques and reduced seed set. Mutants do not accumulate CSP41b protein and CSP41a protein levels are reduced.                                                                                                                                                                                                                                                                                                                                                                                                                                                                                                                                                                                                                                                                          | 18398686 | 1  | 1 |
| AT1G60490 | VPS34   |                                                                            | Similar to wild type siblings. Normal root hair length. Segregates 1:1 for wt:hwt offspring as mutation affects the male gametophyte and is not transmitted.                                                                                                                                                                                                                                                                                                                                                                                                                                                                                                                                                                                                                                                                      | 18408046 | 1  | 1 |
| AT1G69180 | CRC     |                                                                            | Short siliques. Indeterminate floral meristem - carpels enclose extra floral organs.                                                                                                                                                                                                                                                                                                                                                                                                                                                                                                                                                                                                                                                                                                                                              | 18412125 | 1  | 1 |
| AT1G73360 | HDG11   | HDGL2-11                                                                   | edt1 mutant plants show enhanced drought tolerance due to overexpression of the HDG11 protein. edt1 mutants have a longer primary root with more lateral roots, and have a higher root biomass. They have larger epidermal cells and larger stomata, but a lower stomatal density. Nevertheless, they have higher levels of photosynthesis than WT seedlings. Mutant seedlings accumulate higher levels of ABA following PEG treatment, and show constitutively higher levels of Pro. Superoxide dismutase activity is also higher in edt1 mutants. Overexpression of HDG11 in tobacco also causes improved drought tolerance.                                                                                                                                                                                                    | 18451323 | 6  | 6 |
| AT1G73360 | HDG11   | HDGL2-11                                                                   | Although ectopic overexpression of HDG11 confers increased drought tolerance, hdg11-2 mutants do not appear to be less drought tolerant than wild type plants.                                                                                                                                                                                                                                                                                                                                                                                                                                                                                                                                                                                                                                                                    | 18451323 | 1  | 1 |
| AT1G73360 | HDG11   | HDGL2-11                                                                   | Although ectopic overexpression of HDG11 causes increased drought tolerance, there is no evidence for reduced drought tolerance in hdg11-2 hdg12 double mutants. The mutants have a wild type appearance, with the exception of having increased trichome branching.                                                                                                                                                                                                                                                                                                                                                                                                                                                                                                                                                              | 18451323 | 2  | 2 |
| AT1G17920 | HDG12   |                                                                            | Although ectopic overexpression of HDG11 causes increased drought tolerance, there is no evidence for reduced drought tolerance in hdg11-2 hdg12 double mutants. The mutants have a wild type appearance, with the exception of having increased trichome branching.                                                                                                                                                                                                                                                                                                                                                                                                                                                                                                                                                              | 18451323 | 2  | 2 |
| AT1G67140 | SWEETIE |                                                                            | Dwarfed. Small, asymmetric, lancet-shaped leaves (cotyledons unaffected). Early senescence of leaves, petals and sepals. Large stigma. Infertile. Over-accumulates starch and trehalose.                                                                                                                                                                                                                                                                                                                                                                                                                                                                                                                                                                                                                                          | 18452589 | 3  | 3 |
| AT1G06160 | ERF094  | ORA59                                                                      | No accumulation of ORA59 transcripts upon JA or ethephon treatment. Increased susceptibility to B.cinera infection.                                                                                                                                                                                                                                                                                                                                                                                                                                                                                                                                                                                                                                                                                                               | 18467450 | 2  | 0 |
| AT1G19270 | DA1     | SOD1                                                                       | WT phenotype under normal growth conditions                                                                                                                                                                                                                                                                                                                                                                                                                                                                                                                                                                                                                                                                                                                                                                                       | 18483219 | 1  | 1 |
| AT1G19270 | DA1     | SOD1                                                                       | Increased seed and organ size. Seed mass increased to 132% of WT. Increased seed and ovule volume. Increased cotyledon area. Increased embryo size. Increased total seed yield per plant. Increased integument size. Large flowers with extra petals and carpels. Enlarged, somewhat flattened siliques. Round, large leaves. Thick stems. All organs have more cells than WT, but cell size is the same as WT. Longer lifespan than WT.                                                                                                                                                                                                                                                                                                                                                                                          | 18483219 | 13 | 6 |
| AT1G13740 | AFP2    |                                                                            | Hypersensitive to salt, glucose and osmotic stress. Hyperdormant. Slightly sensitive to ABA.                                                                                                                                                                                                                                                                                                                                                                                                                                                                                                                                                                                                                                                                                                                                      | 18484180 | 2  | 2 |
| AT1G17110 | UBP15   | UBIQUITIN-SPECIFIC PROTEASE 15 ubiquitin-specific protease 15              | ubp15-1 mutants exhibit several anatomical defects related to leaf, root, flower, stem, and silique development. Notably, rosette leaves are narrow and serrated. An examination of ubp15-1 leaf cross-sections reveals a reduction in the number of adaxial epidermal and palisade cells spanning the width of the leaf. ubp15-1 mutant leaves also have fewer spongy cell layers than wild type leaves. The aberrant phenotype of this mutant is exacerbated when it is crossed with ubp16-1.                                                                                                                                                                                                                                                                                                                                   | 18485060 | 4  | 2 |
| AT1G78610 | MSL6    |                                                                            | Abolished stretch-activate mechanosensitive channel activity                                                                                                                                                                                                                                                                                                                                                                                                                                                                                                                                                                                                                                                                                                                                                                      | 18485707 |    |   |
| AT1G53470 | MSL4    |                                                                            | Abolished stretch-activate mechanosensitive channel activity                                                                                                                                                                                                                                                                                                                                                                                                                                                                                                                                                                                                                                                                                                                                                                      | 18485707 |    |   |
| AT1G03790 | SOM     |                                                                            | Wild-type seeds germinate when PHYB is activated by red light but not when PHYB is inactivated by far-red light. som mutant seeds germinate at rates of almost 100% irrespective of light conditions.                                                                                                                                                                                                                                                                                                                                                                                                                                                                                                                                                                                                                             | 18487351 | 2  | 2 |
| AT1G60950 | FD2     | PETF PETF1                                                                 | retarded growth, with thin leaves of a lighter yellowish-green color, and more roundly shape                                                                                                                                                                                                                                                                                                                                                                                                                                                                                                                                                                                                                                                                                                                                      | 18494733 | 1  | 0 |
| AT1G67490 | GCS1    | KNP MUC RSW                                                                | Increased number of root hairs and increased stomatal density in siliques.                                                                                                                                                                                                                                                                                                                                                                                                                                                                                                                                                                                                                                                                                                                                                        | 18503769 | 1  | 0 |
| AT1G60490 | VPS34   |                                                                            | Adult plant morphologically normal. Reduced transmission through male gametophyte. More than half of pollen grains are defective having abnormal vacuolar development. Pollen germination and pollen tube growth is also affected.                                                                                                                                                                                                                                                                                                                                                                                                                                                                                                                                                                                                | 18515640 | 3  | 3 |
| AT2G04270 | rne     | G G-like RNase E RNase E RNE RNEE                                          | Segregates 3:1 WT:homozygous mutant. Homozygotes are white and arrest after the cotyledon stage. The phenotype is rescued by growth on sucrose.                                                                                                                                                                                                                                                                                                                                                                                                                                                                                                                                                                                                                                                                                   | 18515828 | 1  | 1 |
| AT2G04270 | rne     | G G-like RNase E RNase E RNE RNEE                                          | White seedlings that arrest at the cotyledon stage. Phenotype rescued by providing sucrose. On sucrose, mutant plants have small chloroplasts with fewer thylakoids and shorter grana stacks than WT. Fully developed chloroplasts are not observed.                                                                                                                                                                                                                                                                                                                                                                                                                                                                                                                                                                              | 18515828 | 1  | 1 |
| AT1G18730 | PnsB4   | NDF6 NDH dependent flow 6                                                  | Impaired NAD(P)H dehydrogenase activity                                                                                                                                                                                                                                                                                                                                                                                                                                                                                                                                                                                                                                                                                                                                                                                           | 18535009 |    |   |
| AT1G06770 | DRIP1   | DREB2A-inTeraclnG proTein 1                                                | There are no obvious morphological defects in the dripl-1 mutant, but the dripl-1 drip 2-1 double mutant has altered gene expression levels and dehydration tolerance. In addition, higher levels of GFP-DREB2A protein are observed in dripl-1 mutants than in wild type seedlings transformed with the same construct.                                                                                                                                                                                                                                                                                                                                                                                                                                                                                                          | 18552202 | 2  | 2 |
| AT1G06770 | DRIP1   | DREB2A-inTeraclnG proTein 1                                                | dripl-1 dripl-2 double mutants are developmentally delayed and bolt, flower, and set seed later than wild type plants. However, their overall size can exceed that of wild type plants if they receive adequate water. The transcript profile of these mutants differs from wild type under normal conditions, and in response to dehydration stress. Levels of numerous stress-inducible transcripts are increased in the double mutant. In addition, the double mutants appear to be more tolerant to dehydration stress than wild type plants, based on ion leakage assays and recovery after dehydration stress experiments.                                                                                                                                                                                                  | 18552202 | 1  | 1 |
| AT1G78570 | RHM1    | ROL1                                                                       | A detailed analysis of the roll-2 mutants show aberrant cotyledon development with an uneven surface and hyponastic growth, aberrant pavement cell and stomatal morphology in cotyledons, and defective trichome formation. Further the typical jigsaw puzzle-like cell shape of pavement cells was absent in roll-2 mutants.                                                                                                                                                                                                                                                                                                                                                                                                                                                                                                     | 18567791 | 2  | 1 |
| AT1G42990 | BZIP60  |                                                                            | The levels of several ER-stress-responsive protein disulfide isomerases (PDI1,5,6,9,10,11) are reduced in this mutant, when ER stress is relieved. However, the level of transcripts for the non-ER-stress-responsive PDI2 and PDI8 is slightly increased under these conditions in the atbzip60 mutant relative to WT plants.                                                                                                                                                                                                                                                                                                                                                                                                                                                                                                    | 18574595 | 2  | 0 |
| AT1G50500 | HIT1    | ATVPS53 HEAT-INTOLERANT 1 VPS53                                            | Reduced transmission of allele through pollen. Homozygotes cannot be recovered. Suspected embryo lethality of homozygotes because reduced seed set is observed in siliques of plants segregating homozygotes. Mature pollen grains appear WT, suggesting that defect occurs at a later stage. Vegetative development appears normal.                                                                                                                                                                                                                                                                                                                                                                                                                                                                                              | 18583349 | 2  | 2 |
| AT1G04030 |         |                                                                            | Mutant meristems develop abnormally. The meristem is enlarged shortly after germination and appears disorganized. Primordia are irregular and lateral organs produced include tubular and finger-like structures. Also affects the development of roots. Primary root growth is inhibited. The root apical meristems are enlarged and lack distinct collumella cells or starch granules.                                                                                                                                                                                                                                                                                                                                                                                                                                          | 18591352 | 5  | 2 |



|           |            |                                                                      |                                                                                                                                                                                                                                                                                                                                                                                                                                                        |          |   |   |
|-----------|------------|----------------------------------------------------------------------|--------------------------------------------------------------------------------------------------------------------------------------------------------------------------------------------------------------------------------------------------------------------------------------------------------------------------------------------------------------------------------------------------------------------------------------------------------|----------|---|---|
| ATIG04020 | BARD1      | ATBARD1 ROW1                                                         | Mutant meristems develop abnormally. The meristem is enlarged shortly after germination and appears disorganized. Primordia are irregular and lateral organs produced include tubular and finger-like structures. Also affects the development of roots. Primary root growth is inhibited. The root apical meristems are enlarged and lack distinct columella cells or starch granules.                                                                | 18591352 | 5 | 2 |
| ATIG11755 | LEW1       |                                                                      | homozygote lethal.                                                                                                                                                                                                                                                                                                                                                                                                                                     | 18612099 | 1 | 0 |
| ATIG69640 | SBH1       |                                                                      | Dwarf plants with reduced vigor, dies before expansion of the true leaves, necrotic lesions on cotyledons. When grown on agar plates, the double mutants displayed extended viability and developed into compact and epinastic rosette with small curled leaves and short petioles, however no bolting. Short roots on agar plate.                                                                                                                     | 18612100 | 3 | 1 |
| ATIG14290 | SBH2       | ATSBH2 sphinGold base hydroxylase 2                                  | Dwarf plants with reduced vigor, dies before expansion of the true leaves, necrotic lesions on cotyledons. When grown on agar plates, the double mutants displayed extended viability and developed into compact and epinastic rosette with small curled leaves and short petioles, however no bolting. Short roots on agar plate.                                                                                                                     | 18612100 | 3 | 1 |
| ATIG64360 | ATIG64360  |                                                                      | early flowering in short days                                                                                                                                                                                                                                                                                                                                                                                                                          | 18614705 | 1 | 1 |
| ATIG50290 | ATIG50290  |                                                                      | early flowering in short days                                                                                                                                                                                                                                                                                                                                                                                                                          | 18614705 | 1 | 1 |
| ATIG65610 | ADR2       | WRR4                                                                 | Homozygotes are susceptible to infection by Acem2, Ac2 and Ac7 inoculations of A. candida white rust pathogens. Blisters and chlorotic patches form on leaves of susceptible plants.                                                                                                                                                                                                                                                                   | 18624640 |   |   |
| ATIG26630 | ELF5A-2    | FBR12                                                                | Increased resistance to Pseudomonas syringae pv tomato DC3000 colonization. 72hrs post-inoculation, CFU/leaf disc values were >94% lower than WT. Inhibition of infection is correlated with curtailed chlorosis and therefore programmed cell death. Morphologically indistinguishable to WT.                                                                                                                                                         | 18633122 |   |   |
| ATIG26630 | ELF5A-2    | FBR12                                                                | Increased leaf chlorosis in response to Pseudomonas syringae pv tomato DC3000 inoculation. Severely stunted growth. Many plants do not produce seed. Stunted plants have yellow, curled leaves, purple cotyledons and abnormal flower morphology. Severity of phenotype is directly correlated with level of overexpression.                                                                                                                           | 18633122 |   |   |
| ATIG13930 | F7A19.2    |                                                                      | Increased sensitivity to salt stress.                                                                                                                                                                                                                                                                                                                                                                                                                  | 18643972 | 1 | 1 |
| ATIG13290 | WIP6       | DOT5                                                                 | dot5-1 mutants have a misaligned venation defect in their leaves and cotyledons. Their phenotypes may vary somewhat, but dot5-1 mutants often have shorter roots and delayed leaf initiation compared to wild-type seedlings. They also have an abnormal petiole length and phyllotaxy. Apical dominance is reduced in dot5-1 mutants, and they appear to be hypersensitive to an application of the polar auxin transport inhibitor NPA.              | 18643975 | 4 | 1 |
| ATIG13290 | WIP6       | DOT5                                                                 | This mutant is reported to have an embryo lethal phenotype in the homozygous state.                                                                                                                                                                                                                                                                                                                                                                    | 18643975 | 1 | 0 |
| ATIG50960 | GA2OX7     |                                                                      | Longer roots when plants are grown under salt stress (50-100mM NaCl).                                                                                                                                                                                                                                                                                                                                                                                  | 18643985 | 1 | 1 |
| ATIG12610 | DREB1F     | DDF2 ERF033                                                          | Longer roots when plants are grown under salt stress (50-100 mM NaCl).                                                                                                                                                                                                                                                                                                                                                                                 | 18643985 | 1 | 1 |
| ATIG32770 | NAC012     | NST3 SND1                                                            | Plants are indehiscent because siliques lack secondary walls except in vascular vessels.                                                                                                                                                                                                                                                                                                                                                               | 18657234 | 1 | 1 |
| ATIG54160 | NYFA5      |                                                                      | Hypersensitive to drought stress.                                                                                                                                                                                                                                                                                                                                                                                                                      | 18682547 | 1 | 1 |
| ATIG14320 | RPL10A     | SAC52                                                                | Double mutant shows increase in growth of 68% relative to ac15-1 single mutant. Also restores normal lignification.                                                                                                                                                                                                                                                                                                                                    | 18694459 | 1 | 1 |
| ATIG14320 | RPL10A     | SAC52                                                                | Defective female gametophytes.                                                                                                                                                                                                                                                                                                                                                                                                                         | 18694459 | 1 | 1 |
| ATIG66970 | SVL2       | GDPL1 SHV3-like 2                                                    | same as smb-3 single mutant                                                                                                                                                                                                                                                                                                                                                                                                                            | 18718934 | 1 | 0 |
| ATIG79940 | ATERD12A   |                                                                      | Reduced transmission through pollen. Pollen grains are viable, but pollen germination is aberrant. Homozygotes cannot be recovered.                                                                                                                                                                                                                                                                                                                    | 18718935 | 1 | 1 |
| ATIG65520 | EC11       |                                                                      | Although the gene that is mutated in this plant encodes a protein that is 49% identical to the IBR10 protein implicated in indole-3-butyric acid (IBA) responses, this mutant displays a normal wild-type IBA response.                                                                                                                                                                                                                                | 18725356 | 1 | 1 |
| AT2G06925 | PLA2-ALPHA | ATSPLA2-ALPHA PHOSPHOLIPASE A2-ALPHA                                 | WT phenotype. Also, no effect on light-induced stomatal opening.                                                                                                                                                                                                                                                                                                                                                                                       | 18725378 | 1 | 1 |
| ATIG02860 | NLA        | BAHI BENZOIC ACID HYPERSENSITIVE 1<br>niTroGen limiTaTion adapTaTion | Exhibits spontaneous cell death in leaves after bolting and increased salicylic acid levels and localized cell death after inoculation with Pst DC3000.                                                                                                                                                                                                                                                                                                | 18753285 | 1 | 1 |
| ATIG54115 | CCX4       | CAX10                                                                | same as smb-3 single mutant                                                                                                                                                                                                                                                                                                                                                                                                                            | 18775974 | 1 | 1 |
| ATIG54115 | CCX4       | CAX10                                                                | Heterozygotes and homozygotes have a WT phenotype                                                                                                                                                                                                                                                                                                                                                                                                      | 18775974 | 1 | 1 |
| ATIG75820 | LRR-RLK    |                                                                      | Triple mutant enhances the floral meristem defects of cvl1-1 single mutant. Novel phenotypes include the existence of an enlarged indeterminate meristem in the center of each flower. Leaves are smaller and number of rosette leaves is increased.                                                                                                                                                                                                   | 18780746 | 3 | 0 |
| ATIG65380 | CLV2       | RLP10                                                                | Number of carpels not statistically significant form that of clv2-1 alone.                                                                                                                                                                                                                                                                                                                                                                             | 18780746 | 1 | 1 |
| ATIG32450 | NPF7.3     | NRT1.5                                                               | Defective in xylem transport of nitrate from root to shoot. Morphologically WT when grown on soil. When grown on plates, roots were shorter than WT                                                                                                                                                                                                                                                                                                    | 18780802 | 1 | 0 |
| AT2G14120 | DRP3B      | ADL2B dynamin related protein                                        | Plants are slower growing than single mutants or non-mutant siblings. Pale mutant color due to decreased number of mitochondria and peroxisomes.                                                                                                                                                                                                                                                                                                       | 18785999 | 2 | 2 |
| ATIG04220 | KCS2       | DAISY KCS17                                                          | significantly reduced root growth                                                                                                                                                                                                                                                                                                                                                                                                                      | 18786002 | 1 | 1 |
| ATIG03770 | RING1B     | ARABIDOPSIS THALIANA RING 1B<br>ATRING1B RING 1B                     | Plants are extremely small with a reduced number of leaves, leaves are sessile and the inflorescences are completely arrested. Enhanced de-repression of KNOX gene expression.                                                                                                                                                                                                                                                                         | 18799658 | 2 | 1 |
| AT2G11810 | MGDC       | ATMGD3 MGD3                                                          | No visible or biochemically determinable mutant phenotype observed under nutrient-sufficient conditions.                                                                                                                                                                                                                                                                                                                                               | 18808455 | 1 | 1 |
| AT2G11810 | MGDC       | ATMGD3 MGD3                                                          | Under Pi starved conditions, reduced DGDC content is observed, the proportion of phosphatidylethanolamine and phosphatidylcholine increased approximately two-fold in shoot and large differences in fatty acid compositions of galactolipids are seen in shoots and particularly roots. Under these conditions, the fresh weight of shoots and roots was reduced.                                                                                     | 18808455 | 2 | 2 |
| ATIG53140 | DRP5A      |                                                                      | Grow normally when seeds were germinated under conventional conditions (21°C), mutant seedlings grow more slowly than those of the wild type at a lower temperature (16°C). In both conditions, the chloroplast size and number per cell in the drp5A mutants. Mutant root tips display perturbation of the cell array and formation of incomplete or twisted cell plates, similar to other A. thaliana mutants of cytokinetic proteins.               | 18809930 | 3 | 2 |
| ATIG62830 | LDL1       | SWP1                                                                 | Roots are longer than WT.                                                                                                                                                                                                                                                                                                                                                                                                                              | 18835563 | 1 | 1 |
| ATIG09270 | IMPA4      |                                                                      | Decreased susceptibility to Agrobacterium-mediated transformation.                                                                                                                                                                                                                                                                                                                                                                                     | 18836040 | 1 | 1 |
| AT2G02760 | UBC2       |                                                                      | The flowering of ubc1/2 double mutants is accelerated compared to wild type plants under long days and short days. Histone2B ubiquitination is lost in ubc1/2 mutants and FLC expression is repressed. There are gene-specific changes in the patterns of histone ubiquitination and methylation in this mutant.                                                                                                                                       | 18849490 | 3 | 2 |
| AT2G02760 | UBC2       |                                                                      | This mutant flowers at the same time as wild type plants, but, a ubc1 ubc2 double mutant has accelerated flowering.                                                                                                                                                                                                                                                                                                                                    | 18849490 | 4 | 3 |
| ATIG55250 | HUB2       | histone mono-ubiquitination 2                                        | The flowering of hub2-2 mutants is accelerated compared to wild type plants under long days and short days. In addition, the plants are small and have pale green leaves. Histone2B ubiquitination is lost in hub2-2 mutants.                                                                                                                                                                                                                          | 18849490 | 3 | 3 |
| ATIG14400 | UBC1       |                                                                      | This mutant flowers at the same time as wild type plants, but, a ubc1 ubc2 double mutant has accelerated flowering.                                                                                                                                                                                                                                                                                                                                    | 18849490 | 1 | 1 |
| ATIG14400 | UBC1       |                                                                      | The flowering of ubc1/2 double mutants is accelerated compared to wild type plants under long days and short days. Histone2B ubiquitination is lost in ubc1/2 mutants and FLC expression is repressed. There are gene-specific changes in the patterns of histone ubiquitination and methylation in this mutant.                                                                                                                                       | 18849490 | 3 | 2 |
| ATIG60220 | ULP1D      | OTS1                                                                 | ots1-1 mutants flower at the same time as wild-type plants when grown under long day conditions and appear phenotypically normal. However, there are abnormal phenotypes associated with the ots1-1 ots1-2 double mutant.                                                                                                                                                                                                                              | 18849491 | 2 | 2 |
| ATIG60220 | ULP1D      | OTS1                                                                 | The ots1-1 ots2-1 double mutant plants flower earlier than wild type plants under long days and short days. They do not differ notably from wild type plants with respect to their overall growth rate, inflorescence structure, or seedling primary root elongation rate. But, they are hypersensitive to salt based on root elongation assays. They also have a higher level of SUMOylated proteins than wild type seedlings exposed to salt stress. | 18849491 | 4 | 4 |
| ATIG10570 | OTS2       | OVERLY TOLERANT TO SALT 2 UB-LIKE<br>PROTEASE 1C ULP1C               | The ots1-1 ots2-1 double mutant plants flower earlier than wild type plants under long days and short days. They do not differ notably from wild type plants with respect to their overall growth rate, inflorescence structure, or seedling primary root elongation rate. But, they are hypersensitive to salt based on root elongation assays. They also have a higher level of SUMOylated proteins than wild type seedlings exposed to salt stress. | 18849491 | 4 | 3 |
| ATIG10570 | OTS2       | OVERLY TOLERANT TO SALT 2 UB-LIKE<br>PROTEASE 1C ULP1C               | ots2-1 mutants flower at the same time as wild-type plants when grown under long day conditions and appear phenotypically normal. However, there are abnormal phenotypes associated with the ots1-1 ots1-2 double mutant.                                                                                                                                                                                                                              | 18849491 | 2 | 1 |
| ATIG20700 | WOX14      | ATWOX14 WUSCHEL RELATED HOMEBOX 14<br>WUSCHEL related homeobox 14    | Reduced fertility, short siliques and aborted seeds. Late flowering. Reduced number of lateral roots. Short stamens.                                                                                                                                                                                                                                                                                                                                   | 18950478 | 4 | 2 |

|           |         |                                                                      |                                                                                                                                                                                                                                                                                                                                                                                                                                                                                                                                                                                                                                                                                                                                                           |          |   |   |
|-----------|---------|----------------------------------------------------------------------|-----------------------------------------------------------------------------------------------------------------------------------------------------------------------------------------------------------------------------------------------------------------------------------------------------------------------------------------------------------------------------------------------------------------------------------------------------------------------------------------------------------------------------------------------------------------------------------------------------------------------------------------------------------------------------------------------------------------------------------------------------------|----------|---|---|
| AT1G80760 | NIP6-1  |                                                                      | Under conditions of low boron, nip6:1-2 mutants have smaller, darker green, and more irregularly shaped young rosette leaves than wild type plants. These leaves have smaller cells and lack intercellular air spaces. Lower boron levels accumulate in these young rosette leaves and in stems with shoot apices when nip6:1-2 mutants are grown under low boron conditions, but, wild type levels of boron accumulate when these plants are grown with sufficient boron. Even under low boron conditions, there are no significant differences in boron levels between wild type and mutant plants in mature leaves. In addition, under normal boron conditions, the leaves of nip6:1-2 mutants grow normally and accumulate wild type levels of boron. | 18952773 | 5 | 1 |
| AT1G80760 | NIP6-1  |                                                                      | Under conditions of low boron, nip6:1-3 mutants have smaller, darker green, and more irregularly shaped young rosette leaves than wild type plants.                                                                                                                                                                                                                                                                                                                                                                                                                                                                                                                                                                                                       | 18952773 | 1 | 1 |
| AT1G07530 | SCL14   |                                                                      | The levels of transcripts for several genes, such as At3g28740 (CYP81D11) and At5g16980 (NADP-dependent oxidoreductase) are altered in scl14 mutant plants. Some of these genes have as-1-like elements in their promoters.                                                                                                                                                                                                                                                                                                                                                                                                                                                                                                                               | 18984675 | 2 | 0 |
| AT1G26260 | CIB5    |                                                                      | cib1 or cib5 single mutant shows no obvious phenotype, and cib1cib5 double mutant showed a mild but statistically significant delay of flowering under a photoperiodic inductive condition (plants were grown in short-day photoperiod (9h light/15h dark) for 20 days and transferred to long-day photoperiod (16h light/ 8h dark) for 4 days, and removed back to short-day to continue grow until flowering.                                                                                                                                                                                                                                                                                                                                           | 18988809 |   |   |
| AT2G01950 | LRR-RLK |                                                                      | Abnormal leaf venation. Reduced number of leaf veins.                                                                                                                                                                                                                                                                                                                                                                                                                                                                                                                                                                                                                                                                                                     | 19000166 | 2 | 2 |
| AT1G14000 |         |                                                                      | Abnormal leaf venation. Increased number of veins end freely rather than in loops.                                                                                                                                                                                                                                                                                                                                                                                                                                                                                                                                                                                                                                                                        | 19000166 |   |   |
| AT2G04550 | IBR5    | SKIP33                                                               | A higher proportion of the MPK12 protein isolated from ibr5-3 mutants is dually phosphorylated. The MPK12 protein isolated from ibr5-3 mutants also has higher activity than the MPK12 protein isolated from wild type plants.                                                                                                                                                                                                                                                                                                                                                                                                                                                                                                                            | 19000167 | 2 | 0 |
| AT1G29990 | PPD6    | prefoldin 6                                                          | Seedlings exhibit root swelling when grown in the presence of 100 nM oryzalin and have a 25% reduction in hypocotyl length. Reduced cell size is due to defects in the microtubules. Microtubules in the root elongation zone remain disorganized. Also affects epidermal cells which have abnormal division planes.                                                                                                                                                                                                                                                                                                                                                                                                                                      | 19004800 | 2 | 1 |
| AT1G31880 | BRX     | BREVIS RADIX NIP3:1 NLM9                                             | lateral root formation in the mutant is insensitive to exogenous cytokinin; altered auxin response in lateral root primordium in the presence of exogenous cytokinin.                                                                                                                                                                                                                                                                                                                                                                                                                                                                                                                                                                                     | 19037657 | 2 | 2 |
| AT1G34355 | PS1     | ATPS1 PARALLEL SPINDLE 1                                             | diploid pollen grains                                                                                                                                                                                                                                                                                                                                                                                                                                                                                                                                                                                                                                                                                                                                     | 19043546 | 1 | 1 |
| AT1G55320 | AAE18   |                                                                      | Resistant to 2,4-dichlorophenoxybutyric acid (2,4 DB), a compound that is metabolized to active auxin. When grown in the presence of pro-auxins, roots are shorter than normal.                                                                                                                                                                                                                                                                                                                                                                                                                                                                                                                                                                           | 19043666 | 2 | 2 |
| AT1G27320 | AHK3    | ORE12                                                                | Reduced levels of cytokinin inducible gene expression, specifically AAR5-7.                                                                                                                                                                                                                                                                                                                                                                                                                                                                                                                                                                                                                                                                               | 19048287 | 1 | 0 |
| AT1G05690 | BT3     |                                                                      | Reduced seed set and shortened siliques. Phenotype is identical to bt2-3/+;bt3-1/+                                                                                                                                                                                                                                                                                                                                                                                                                                                                                                                                                                                                                                                                        | 19054356 | 2 | 0 |
| AT1G05690 | BT3     |                                                                      | Embryo lethal - not recovered.                                                                                                                                                                                                                                                                                                                                                                                                                                                                                                                                                                                                                                                                                                                            | 19054356 | 1 | 0 |
| AT1G05690 | BT3     |                                                                      | same as smb-3 single mutant                                                                                                                                                                                                                                                                                                                                                                                                                                                                                                                                                                                                                                                                                                                               | 19054356 | 1 | 0 |
| AT1G05690 | BT3     |                                                                      | Double homozygotes are embryo lethal. Double heterozygotes have short siliques and a reduced seed set.                                                                                                                                                                                                                                                                                                                                                                                                                                                                                                                                                                                                                                                    | 19054356 | 2 | 0 |
| AT1G17580 | XI-1    | MYA1                                                                 | The xi-k / xi-1 double mutant plants are shorter and have smaller rosettes than wild type plants. Their reduced leaf size results from decreased cell size and decreased cell number. These double mutants produce fewer seeds per silique than wild type plants. In the leaf epidermis, Golgi stacks, peroxisomes, and mitochondria move more slowly in these mutant cells than in wild-type cells. Root hair length is reduced to ~35% of the wild type root hair length in these double mutants, but their root hair density is very similar to the wild type density.                                                                                                                                                                                 | 19060218 | 5 | 4 |
| AT1G04160 | XIB     | ATXIB MYOSIN XI B myosin XI B MYOSIN XI-8 XI-8 XI-B                  | The overall growth of the xi-2 / xi-b double mutant is normal. In the leaf epidermis, Golgi stacks and peroxisomes move more slowly in these mutant cells than in wild-type cells. The rate of mitochondrial movement is also slightly reduced. Root hair length is reduced to ~15% of the wild type root hair length in these double mutants, but their root hair density is very similar to the wild type density.                                                                                                                                                                                                                                                                                                                                      | 19060218 | 5 | 2 |
| AT1G07130 | STN1    |                                                                      | Plants exhibit loss of apical dominance, fasciation, aberrant phyllotaxy, and reduced leaf size. Over generations, the germination rate also decreases to below 20%.                                                                                                                                                                                                                                                                                                                                                                                                                                                                                                                                                                                      | 19064932 | 2 | 0 |
| AT1G07128 |         |                                                                      | Plants exhibit loss of apical dominance, fasciation, aberrant phyllotaxy, and reduced leaf size. Over generations, the germination rate also decreases to below 20%.                                                                                                                                                                                                                                                                                                                                                                                                                                                                                                                                                                                      | 19064932 |   |   |
| AT1G48050 | KU80    | ATKU80 KU80-LIKE PROTEIN                                             | Delayed bolting during later stages of development.                                                                                                                                                                                                                                                                                                                                                                                                                                                                                                                                                                                                                                                                                                       | 19070688 |   |   |
| AT1G68460 | IPT1    |                                                                      | Reduced cambial activity and reduced secondary growth in both shoots and roots.                                                                                                                                                                                                                                                                                                                                                                                                                                                                                                                                                                                                                                                                           | 19074290 | 1 | 1 |
| AT1G79580 | SMB     | NAC033                                                               | Additional columella root cap and lateral root cap cell layers in the mature embryo and postembryonic root development. Root meristem length and cell number is similar to WT. Extra layer of small, stem-cell-like cells, below the columella and lateral root cap stem cells.                                                                                                                                                                                                                                                                                                                                                                                                                                                                           | 19081078 |   |   |
| AT1G26870 | FEZ     | NAC009                                                               | Homozygotes have a reduced number of columella root cap (COL) and lateral root cap (LRC) cell layers. Meristem length, meristem cell number and root length are comparable to WT. Periclinal division rates in the COL and LRC stem cells are reduced.                                                                                                                                                                                                                                                                                                                                                                                                                                                                                                    | 19081078 |   |   |
| AT1G76100 | PETE1   | plAsTocyanin 1                                                       | Delayed bolting. Reduced copper accumulation. Reduced iron accumulation.                                                                                                                                                                                                                                                                                                                                                                                                                                                                                                                                                                                                                                                                                  | 19084994 | 3 | 1 |
| AT1G20340 | DRT112  |                                                                      | Lower biomass than WT. Delayed bolting. Reduced copper accumulation.                                                                                                                                                                                                                                                                                                                                                                                                                                                                                                                                                                                                                                                                                      | 19084994 | 3 | 3 |
| AT1G03770 | RING1B  | ARABIDOPSIS THALIANA RING 1B ATRING1B RING 1B                        | Pleiotropic defects. Leaves may be lobed, downward curving or make ectopic meristems. The SAM is enlarged and phyllotaxy is abnormal and the shoot apex may terminate in a cluster of flowers with extra floral organs. Occasional homeotic conversion of petals to stamens.                                                                                                                                                                                                                                                                                                                                                                                                                                                                              | 19097900 |   |   |
| AT1G03770 | RING1B  | ARABIDOPSIS THALIANA RING 1B ATRING1B RING 1B                        | Plants are extremely small with a reduced number of leaves, leaves are sessile and the inflorescences are completely arrested. Cotyledons are relatively well expanded. Enhanced de-repression of KNOX gene expression.                                                                                                                                                                                                                                                                                                                                                                                                                                                                                                                                   | 19097900 |   |   |
| AT1G20830 | MCD1    |                                                                      | defective in chloroplast division                                                                                                                                                                                                                                                                                                                                                                                                                                                                                                                                                                                                                                                                                                                         | 19135368 |   |   |
| AT1G20820 |         |                                                                      | defective in chloroplast division                                                                                                                                                                                                                                                                                                                                                                                                                                                                                                                                                                                                                                                                                                                         | 19135368 |   |   |
| AT1G64990 | GTG1    |                                                                      | gtg1 mutant plants do not show any obvious phenotypic abnormalities and are indistinguishable from wild-type plants.                                                                                                                                                                                                                                                                                                                                                                                                                                                                                                                                                                                                                                      | 19135895 |   |   |
| AT1G64990 | GTG1    |                                                                      | These double mutants are hypersensitive to ABA in seed germination, post-germination development, root elongation, ABA-induced gene expression, and ABA-induced stomatal closure assays. However, they have a normal response to ABA in inhibition of stomatal opening assays. These mutants are smaller than wild-type plants and flower earlier. They have normal endogenous levels of ABA. No differences in the transcript levels of CHLH, FCA, or GCR2 are observed in these mutants compared to wild-type plants.                                                                                                                                                                                                                                   | 19135895 |   |   |
| AT1G14720 | XTH28   |                                                                      | The developing flowers of atxth28 mutant showed characteristic phenotypes a significantly lower elongation ratio of the stamen at the pollination stage, an increased angle between the stamen and pistil, and an aberrant orientation of anther dehiscence. As a result the capability for automatic self-pollination was decreased in the mutant.                                                                                                                                                                                                                                                                                                                                                                                                       | 19139039 | 4 | 1 |
| AT1G79250 | AGC1-7  | AGC1.7                                                               | Double mutant displays defects in pollen tubes. Tubes are wider and bulge out indicating a defect in polarity maintenance. Pollen tubes are also shorter.                                                                                                                                                                                                                                                                                                                                                                                                                                                                                                                                                                                                 | 19144004 | 3 | 3 |
| AT1G53940 | GLIP2   |                                                                      | has increased number of lateral roots, hypocotyls have impaired gravitropic curvature                                                                                                                                                                                                                                                                                                                                                                                                                                                                                                                                                                                                                                                                     | 19146828 |   |   |
| AT2G06510 | RPA1A   | ATRPA1A ATRPA70A replication protein A 1A RPA70-KDA SUBUNIT A RPA70A | This double mutant has a lower chiasma frequency than either single mutant, but more chiasma than Atrpala/Atmsb4 or Atmsb4.                                                                                                                                                                                                                                                                                                                                                                                                                                                                                                                                                                                                                               | 19153602 | 2 | 0 |
| AT2G06510 | RPA1A   | ATRPA1A ATRPA70A replication protein A 1A RPA70-KDA SUBUNIT A RPA70A | This double mutant has even lower fertility and shorter siliques than atrpa1 mutants. These mutants have a residual chiasmata frequency and distribution comparable to msb4 mutants.                                                                                                                                                                                                                                                                                                                                                                                                                                                                                                                                                                      | 19153602 | 2 | 0 |
| AT2G06510 | RPA1A   | ATRPA1A ATRPA70A replication protein A 1A RPA70-KDA SUBUNIT A RPA70A | Meiosis in pollen mother cells proceeds normally from early prophase I to the pachytene stage where full synapsis is observed, in the mutants. However, a reduced number of chiasmata are detected in the mutants during chromosome condensation in late diplotene/diakinesis. Univalent chromosomes present at metaphase I cause mis-segregation at meiosis I and therefore, aneuploid tetrads are observed following meiosis II. There is no evidence of chromosome fragmentation in these mutants, suggesting that RPA1a is not required per se for the repair of double strand breaks during meiosis.                                                                                                                                                 | 19153602 | 3 | 0 |

|           |          |                                                                                                    |                                                                                                                                                                                                                                                                                                                                                                                                                                                                                                                                                                                                                                                                                                                                                                                                                                                                                                                                                                                                                                                                                                                                                       |          |   |   |
|-----------|----------|----------------------------------------------------------------------------------------------------|-------------------------------------------------------------------------------------------------------------------------------------------------------------------------------------------------------------------------------------------------------------------------------------------------------------------------------------------------------------------------------------------------------------------------------------------------------------------------------------------------------------------------------------------------------------------------------------------------------------------------------------------------------------------------------------------------------------------------------------------------------------------------------------------------------------------------------------------------------------------------------------------------------------------------------------------------------------------------------------------------------------------------------------------------------------------------------------------------------------------------------------------------------|----------|---|---|
| AT2G06510 | RPAlA    | ATRPAlA ATRPA70A replication proTein A 1A RPA70A-KDA SUBUNIT A RPA70A                              | The rpAla mutant has normal vegetative growth, but lower levels of fertility. Siliques are shorter in rpAla mutants than in wild type plants, and their mean seed set per silique is reduced by ~68%. Pollen viability is also reduced in the mutants. Meiosis in pollen mother cells proceeds normally from early prophase I to the pachytene stage where full synapsis is observed, in the mutants. However, a reduced number of chiasmata are detected in the mutants during chromosome condensation in late diplotene/diakinesis. Univalent chromosomes present at metaphase I cause mis-segregation at meiosis I and therefore, aneuploid tetrads are observed following meiosis II. There is no evidence of chromosome fragmentation in these mutants, suggesting that RPAla is not required per se for the repair of double strand breaks during meiosis. There are no major defects in axis formation or synaptonemal complex formation in these mutants, nor are the number of MSH4 foci altered. However, there is a reduced number of MLH1 and MLH3 foci, suggesting that more recombination intermediates are repaired as non-cross-overs | 19153602 | 3 | 1 |
| AT1G54060 | AS1L1    |                                                                                                    | Small seedlings, with slightly darker green, orbicular leaf blades and shorter leaf petioles than WT. Adult plants are 17% shorter than WT. Short siliques, small seeds, lower seed weight than WT. Delayed flowering in long days.                                                                                                                                                                                                                                                                                                                                                                                                                                                                                                                                                                                                                                                                                                                                                                                                                                                                                                                   | 19155348 | 3 | 0 |
| AT2G03120 | SPP      |                                                                                                    | no homozygotes were recovered from the heterozygous mutant, mutant pollen appeared normal by Alexander stain but failed to germinate, the organization of the male germ unit (MGU) is disrupted, the vegetative nuclei were malformed with displacement of the two sperm cells, or the entire MGU were mislocalized to the pollen periphery.                                                                                                                                                                                                                                                                                                                                                                                                                                                                                                                                                                                                                                                                                                                                                                                                          | 19168645 | 1 | 1 |
| AT1G77300 | EPS      | ASH1 HOMOLOG 2 ASHH2 CCR1 EARLY FLOWERING IN SHORT DAYS LAZ2 LAZARUS 2 SDGS SET DOMAIN GROUP 8     | Reduced levels of lutein.                                                                                                                                                                                                                                                                                                                                                                                                                                                                                                                                                                                                                                                                                                                                                                                                                                                                                                                                                                                                                                                                                                                             | 19174535 | 1 | 1 |
| AT1G77300 | EPS      | ASH1 HOMOLOG 2 ASHH2 CCR1 EARLY FLOWERING IN SHORT DAYS LAZ2 LAZARUS 2 SDGS SET DOMAIN GROUP 8     | Lutein levels reduced by 30-70%. Increased shoot branching (2-3X more branches), early flowering and reduced fertility.                                                                                                                                                                                                                                                                                                                                                                                                                                                                                                                                                                                                                                                                                                                                                                                                                                                                                                                                                                                                                               | 19174535 | 2 | 2 |
| AT1G62360 | STM      |                                                                                                    | Double mutant enhances the SAM phenotype. 80% of double mutants show shoot termination after germination and production of the first two sets of leaves. Shoots regenerate at a low frequency.                                                                                                                                                                                                                                                                                                                                                                                                                                                                                                                                                                                                                                                                                                                                                                                                                                                                                                                                                        | 19175771 | 3 | 3 |
| AT1G31880 | BRX      | BREVIS RADIX NIP3;1 NLM9                                                                           | enhanced response to ABA-mediated inhibition of root growth                                                                                                                                                                                                                                                                                                                                                                                                                                                                                                                                                                                                                                                                                                                                                                                                                                                                                                                                                                                                                                                                                           | 19201913 | 1 | 1 |
| AT1G27760 | SAT32    | ATSAT32 SALT-TOLERANCE 32                                                                          | Reduced fertility. Increased root length (longer roots). Hypersensitive to salt stress.                                                                                                                                                                                                                                                                                                                                                                                                                                                                                                                                                                                                                                                                                                                                                                                                                                                                                                                                                                                                                                                               | 19210750 | 3 | 3 |
| AT1G77980 | AGL66    |                                                                                                    | Reduced seed set.                                                                                                                                                                                                                                                                                                                                                                                                                                                                                                                                                                                                                                                                                                                                                                                                                                                                                                                                                                                                                                                                                                                                     | 19211705 | 1 | 1 |
| AT1G77980 | AGL66    |                                                                                                    | Reduced seed set. Pollen tubes are delayed in germination/growth.                                                                                                                                                                                                                                                                                                                                                                                                                                                                                                                                                                                                                                                                                                                                                                                                                                                                                                                                                                                                                                                                                     | 19211705 | 2 | 2 |
| AT1G22130 | AGL104   |                                                                                                    | Reduced seed set.                                                                                                                                                                                                                                                                                                                                                                                                                                                                                                                                                                                                                                                                                                                                                                                                                                                                                                                                                                                                                                                                                                                                     | 19211705 | 1 | 1 |
| AT1G22130 | AGL104   |                                                                                                    | Reduced seed set. Pollen tubes are delayed in germination/growth.                                                                                                                                                                                                                                                                                                                                                                                                                                                                                                                                                                                                                                                                                                                                                                                                                                                                                                                                                                                                                                                                                     | 19211705 | 2 | 2 |
| AT1G68640 | PAN      |                                                                                                    | Double mutant displays pentamerous flowers typical of PAN mutants but also displays defects in later stages of petal development.                                                                                                                                                                                                                                                                                                                                                                                                                                                                                                                                                                                                                                                                                                                                                                                                                                                                                                                                                                                                                     | 19218396 | 2 | 1 |
| AT1G62940 | 4CLL1    | ACOS5                                                                                              | pollen development arrested after released from tetrads, free microspores were devoid of exine layer, completely absence of pollen grains at anther maturity, completely male sterile                                                                                                                                                                                                                                                                                                                                                                                                                                                                                                                                                                                                                                                                                                                                                                                                                                                                                                                                                                 | 19218397 | 1 | 1 |
| AT1G74030 | ENO1     |                                                                                                    | Trichomes are less turgid and are distorted with respect to the wild type. Plants also have fewer root hairs with respect to wild type.                                                                                                                                                                                                                                                                                                                                                                                                                                                                                                                                                                                                                                                                                                                                                                                                                                                                                                                                                                                                               | 19223001 | 2 | 0 |
| AT1G09110 |          | TRNA-GLU-1                                                                                         | double mutants are both male and female gametophyte lethal                                                                                                                                                                                                                                                                                                                                                                                                                                                                                                                                                                                                                                                                                                                                                                                                                                                                                                                                                                                                                                                                                            | 19223514 | 1 | 1 |
| AT1G09100 | RPT5B    | TBP1                                                                                               | double mutants are both male and female gametophyte lethal                                                                                                                                                                                                                                                                                                                                                                                                                                                                                                                                                                                                                                                                                                                                                                                                                                                                                                                                                                                                                                                                                            | 19223514 | 1 | 1 |
| AT1G72970 | HTH      |                                                                                                    | Pollen development defective.                                                                                                                                                                                                                                                                                                                                                                                                                                                                                                                                                                                                                                                                                                                                                                                                                                                                                                                                                                                                                                                                                                                         | 19237690 | 1 | 1 |
| AT1G16300 | GAPCP2   |                                                                                                    | weaker induction of HSP70A following AZC treatment of the hsfA2 mutant line when compared with wild-type                                                                                                                                                                                                                                                                                                                                                                                                                                                                                                                                                                                                                                                                                                                                                                                                                                                                                                                                                                                                                                              | 19244141 | 1 | 0 |
| AT1G53130 | GRI      |                                                                                                    | increased ROS-induced cell death (ROS: reactive oxygen species); decreased seed content; more resistant to bacterial pathogen Pseudomonas syringae                                                                                                                                                                                                                                                                                                                                                                                                                                                                                                                                                                                                                                                                                                                                                                                                                                                                                                                                                                                                    | 19279211 | 3 | 2 |
| AT1G04580 | AA04     | A02                                                                                                | Reduced Levels of Total BA and of Benzoylated Glucosinolates                                                                                                                                                                                                                                                                                                                                                                                                                                                                                                                                                                                                                                                                                                                                                                                                                                                                                                                                                                                                                                                                                          | 19297586 | 1 | 0 |
| AT1G49240 | ACT8     |                                                                                                    | Lacks root hairs. Root hairs initiate but do not develop further.                                                                                                                                                                                                                                                                                                                                                                                                                                                                                                                                                                                                                                                                                                                                                                                                                                                                                                                                                                                                                                                                                     | 19304937 | 2 | 1 |
| AT1G49240 | ACT8     |                                                                                                    | Short root hairs. 50% reduction in root hair length compared to wild type.                                                                                                                                                                                                                                                                                                                                                                                                                                                                                                                                                                                                                                                                                                                                                                                                                                                                                                                                                                                                                                                                            | 19304937 | 1 | 1 |
| AT1G49240 | ACT8     |                                                                                                    | Plants are dwarf. Leaves are smaller and contain fewer cells and fewer lobes than wild type. Reduced number of trichome branches. Petals are narrow. Roots are more severely affected and produce short root hairs. Cell files are irregular and the elongation zone is much reduced.                                                                                                                                                                                                                                                                                                                                                                                                                                                                                                                                                                                                                                                                                                                                                                                                                                                                 | 19304937 | 4 | 3 |
| AT1G58440 | SQE1     | DRY2 XF1                                                                                           | Plants are hypersensitive to drought. Mutants have decreased stomatal conductance when grown in low relative humidity. Root architecture is affected: roots are 60% shorter than wild type and produce more lateral roots. Lateral roots are shorter and branched. Plants are shorter and leaves are yellow green. Chemically, the mutants have decreased sterols in the roots, decreased chlorophyll levels and increased levels of proline.                                                                                                                                                                                                                                                                                                                                                                                                                                                                                                                                                                                                                                                                                                         | 19309460 | 5 | 4 |
| AT1G03060 | SP1      | SPIRRIG                                                                                            | Trichome cells have shorter branches, reduced stalk length and width. Epidermal pavement cells are less complex, with less lobing. Root hairs are shorter and root hair vacuoles are fragmented.                                                                                                                                                                                                                                                                                                                                                                                                                                                                                                                                                                                                                                                                                                                                                                                                                                                                                                                                                      | 19392685 | 3 | 0 |
| AT1G49430 | LACS2    | LATERAL ROOT DEVELOPMENT 2 LRD2                                                                    | The lacs1-1 lacs2-3 double mutants had a synergistic phenotype, compared to either of the single mutants, with drastically reduced stem wax and cutin contents, increased cuticle permeability, and severe male sterile in low humidity.                                                                                                                                                                                                                                                                                                                                                                                                                                                                                                                                                                                                                                                                                                                                                                                                                                                                                                              | 19392700 | 1 | 1 |
| AT1G58360 | AAP1     | NAT2                                                                                               | reduced total N and carbon content and increased amino acid levels in mature and desiccated mutant seeds; elevated amino acid level in the seed coat/endosperm; increased number of protein bodies in the endosperm; decreased storage protein levels.                                                                                                                                                                                                                                                                                                                                                                                                                                                                                                                                                                                                                                                                                                                                                                                                                                                                                                | 19392706 | 3 | 3 |
| AT1G34245 | EPP2     |                                                                                                    | stomatal development abnormal                                                                                                                                                                                                                                                                                                                                                                                                                                                                                                                                                                                                                                                                                                                                                                                                                                                                                                                                                                                                                                                                                                                         | 19398336 |   |   |
| AT2G14540 | SRP2     |                                                                                                    | When exposed to MMS, mutants grew consistently more vigorously than wild-type. Reduced induction of DNA repair- and cell cycle-related genes.                                                                                                                                                                                                                                                                                                                                                                                                                                                                                                                                                                                                                                                                                                                                                                                                                                                                                                                                                                                                         | 19426562 | 2 | 0 |
| AT1G64030 | SRP3     |                                                                                                    | When exposed to MMS, mutants grew consistently more vigorously than wild-type. Reduced induction of DNA repair- and cell cycle-related genes.                                                                                                                                                                                                                                                                                                                                                                                                                                                                                                                                                                                                                                                                                                                                                                                                                                                                                                                                                                                                         | 19426562 | 2 | 0 |
| AT1G15510 | PCMP-H73 | ECB2 VAC1                                                                                          | early chloroplast biogenesis mutant; lacks an organized thylakoid membrane; albino cotyledons; seedling lethal.                                                                                                                                                                                                                                                                                                                                                                                                                                                                                                                                                                                                                                                                                                                                                                                                                                                                                                                                                                                                                                       | 19500301 | 4 | 3 |
| AT1G2010  | AT1G2010 |                                                                                                    | The acc mutant appears to have only ~85% of the ethylene of wild type plants.                                                                                                                                                                                                                                                                                                                                                                                                                                                                                                                                                                                                                                                                                                                                                                                                                                                                                                                                                                                                                                                                         | 19513806 | 1 | 1 |
| AT1G69560 | MYB105   | ATMYB105 LATERAL ORGAN FUSION 2 LOF2 MYB DOMAIN PROTEIN 105 myb domain protein 105                 | defects in organ separation as a result of abnormal cell division and expansion during early boundary formation                                                                                                                                                                                                                                                                                                                                                                                                                                                                                                                                                                                                                                                                                                                                                                                                                                                                                                                                                                                                                                       | 19542355 | 1 | 1 |
| AT1G26780 | MYB117   | CTF LOF1                                                                                           | defects in organ separation as a result of abnormal cell division and expansion during early boundary formation                                                                                                                                                                                                                                                                                                                                                                                                                                                                                                                                                                                                                                                                                                                                                                                                                                                                                                                                                                                                                                       | 19542355 | 1 | 1 |
| AT1G64690 | BLT      | BRANCHLESS TRICHOME BRANCHLESS TRICHOMES                                                           | branchless trichomes with blunt tips                                                                                                                                                                                                                                                                                                                                                                                                                                                                                                                                                                                                                                                                                                                                                                                                                                                                                                                                                                                                                                                                                                                  | 19626137 | 1 | 1 |
| AT1G04510 | MAC3A    | F19P19.2; F19P19.2; MOS4-associated complex 3A; MOS4-associated complex 3A                         | defective in R protein-mediated defense response                                                                                                                                                                                                                                                                                                                                                                                                                                                                                                                                                                                                                                                                                                                                                                                                                                                                                                                                                                                                                                                                                                      | 19629177 | 1 | 1 |
| AT1G08030 | TPST     |                                                                                                    | Seedlings of tpst-1 had stunted roots and smaller cotyledons compared with the WT. tpst-1 has an abnormally shaped root apical meristem due to disorganized cell division and expansion. At 15 days after germination, the leaves of the tpst-1 plants are small and pale green, the number of higher order veins is reduced, and the secondary veins often do not close. At the flowering stage, tpst-1 has smaller rosettes, tiny leaves showing early senescence, shorter inflorescence, and a reduced number of flowers and siliques. The fertility and seed set of tpst-1 are normal.                                                                                                                                                                                                                                                                                                                                                                                                                                                                                                                                                            | 19666544 | 5 | 4 |
| AT1G25540 | MED25    | MED25 1 PFT1                                                                                       | susceptible to leaf infecting necrotrophic pathogens                                                                                                                                                                                                                                                                                                                                                                                                                                                                                                                                                                                                                                                                                                                                                                                                                                                                                                                                                                                                                                                                                                  | 19671879 | 1 | 1 |
| AT1G08450 | CRT3     | A. Thaliana calreticulin 3 ATCRT3 CALRETICULIN 3 calreticulin 3 ERS2 PRIORITY IN SWEET LIPE 1 PSL1 | compromised in EFR but not PLS2 signaling.                                                                                                                                                                                                                                                                                                                                                                                                                                                                                                                                                                                                                                                                                                                                                                                                                                                                                                                                                                                                                                                                                                            | 19717464 | 1 | 1 |
| AT1G33240 | GTL1     | AT-GTL1 AT-GTL2 ATGTL1 GT-2-like 1 GT2-LIKE 1 GT2-LIKE 2                                           | increased trichome cell size and nuclear DNA content without affecting the number of trichome branches                                                                                                                                                                                                                                                                                                                                                                                                                                                                                                                                                                                                                                                                                                                                                                                                                                                                                                                                                                                                                                                | 19717615 | 1 | 1 |
| AT1G69870 | NPP2.13  | NRT1.7                                                                                             | mutant plants accumulate a higher amount of nitrate in older leaves; defective in remobilizing nitrate from older leaves to younger leaves.                                                                                                                                                                                                                                                                                                                                                                                                                                                                                                                                                                                                                                                                                                                                                                                                                                                                                                                                                                                                           | 19734434 | 2 | 2 |
| AT2G01290 | RP12     |                                                                                                    | Low chlorophyll content. Chloroplast were smaller and accumulated fewer and smaller starch granules than wild-type. Under short-day conditions, the flowering times of the mutant plants were significantly delayed. Premature cell death.                                                                                                                                                                                                                                                                                                                                                                                                                                                                                                                                                                                                                                                                                                                                                                                                                                                                                                            | 19744161 | 4 | 4 |
| AT1G09090 | RBOHB    | ATRBOHB ATRBOHB-BETA                                                                               | Mutants fail to after-ripen and show reduced protein oxidation.                                                                                                                                                                                                                                                                                                                                                                                                                                                                                                                                                                                                                                                                                                                                                                                                                                                                                                                                                                                                                                                                                       | 19761445 | 1 | 1 |
| AT1G67370 | ASY1     | ASYNAPTIC 1; ATASY1; FIN21.19                                                                      | Defective in meiotic double strand break formation. Fewer chiasmata formed per cell compared to the wild type cells.                                                                                                                                                                                                                                                                                                                                                                                                                                                                                                                                                                                                                                                                                                                                                                                                                                                                                                                                                                                                                                  | 19763177 | 2 | 1 |
| AT1G14750 | SDS      | SOLO DANCERS                                                                                       | Defective in meiotic double strand break formation. Fewer chiasmata formed per cell compared to the wild type cells.                                                                                                                                                                                                                                                                                                                                                                                                                                                                                                                                                                                                                                                                                                                                                                                                                                                                                                                                                                                                                                  | 19763177 | 2 | 1 |
| AT1G13330 | HOP2     | AHP2                                                                                               | Defective in meiotic double strand break formation. Fewer chiasmata formed per cell compared to the wild type cells.                                                                                                                                                                                                                                                                                                                                                                                                                                                                                                                                                                                                                                                                                                                                                                                                                                                                                                                                                                                                                                  | 19763177 | 2 | 1 |
| AT1G01690 | PRD3     | ATPRD3                                                                                             | Defective in meiotic double strand break formation. Fewer chiasmata formed per cell compared to the wild type cells.                                                                                                                                                                                                                                                                                                                                                                                                                                                                                                                                                                                                                                                                                                                                                                                                                                                                                                                                                                                                                                  | 19763177 | 2 | 1 |
| AT1G03300 | DUP1     |                                                                                                    | same as smb-3 single mutant                                                                                                                                                                                                                                                                                                                                                                                                                                                                                                                                                                                                                                                                                                                                                                                                                                                                                                                                                                                                                                                                                                                           | 19795213 |   |   |

|           |           |                                                                                                                                                             |                                                                                                                                                                                                                                                                                                                                                                                                                                                                                                                                                                                                           |          |   |   |
|-----------|-----------|-------------------------------------------------------------------------------------------------------------------------------------------------------------|-----------------------------------------------------------------------------------------------------------------------------------------------------------------------------------------------------------------------------------------------------------------------------------------------------------------------------------------------------------------------------------------------------------------------------------------------------------------------------------------------------------------------------------------------------------------------------------------------------------|----------|---|---|
| AT1G12770 | RH47      | EMB1586 ISE1                                                                                                                                                | mutants typically arrest before the mid-torpedo stage                                                                                                                                                                                                                                                                                                                                                                                                                                                                                                                                                     | 19805190 | 1 | 0 |
| AT1G27370 | SPL10     |                                                                                                                                                             | Wider lamina in the third cauline leaf than the respective single mutants. Increased number of trichomes on sepals than the respective single mutants.                                                                                                                                                                                                                                                                                                                                                                                                                                                    | 19880401 | 1 | 1 |
| AT1G27370 | SPL10     |                                                                                                                                                             | Cauline leaves and sepal trichomes show morphological defects. Specifically, leaf lamina is wider than WT in the third cauline leaf. These phenotypes indicate a delayed vegetative - to reproductive phase change.                                                                                                                                                                                                                                                                                                                                                                                       | 19880401 | 2 | 2 |
| AT1G27360 | SPL11     |                                                                                                                                                             | Cauline leaves and sepal trichomes show morphological defects. Specifically, leaf lamina is wider than WT in the third cauline leaf. These phenotypes indicate a delayed vegetative - to reproductive phase change.                                                                                                                                                                                                                                                                                                                                                                                       | 19880401 | 2 | 2 |
| AT1G27360 | SPL11     |                                                                                                                                                             | Wider lamina in the third cauline leaf than the respective single mutants.                                                                                                                                                                                                                                                                                                                                                                                                                                                                                                                                | 19880401 | 1 | 1 |
| AT1G56590 | ZIP4      | adaptor protein-3 mu-adaptin; AP3M; F25P12.96; F25P12.96; ZIG SUPPRESSOR 4                                                                                  | Partially suppressed the abnormality of zig-1 in both gravitropism and stem morphology.                                                                                                                                                                                                                                                                                                                                                                                                                                                                                                                   | 19884248 | 2 | 2 |
| AT1G10310 | AT1G10310 | F14N23.19; F14N23.19                                                                                                                                        | Mutants have reduced seed 18:1 delta nine fatty acids. An analogous change in fatty acids is seen in the leaf, but it is more subtle than in seed.                                                                                                                                                                                                                                                                                                                                                                                                                                                        | 19906890 | 1 | 1 |
| AT1G08260 | TIL1      | ABA OVERLY SENSITIVE 4 ABO4 EARLY IN SHORT DAYS 7 EMB142 EMB2284 EMB529 EMBRYO DEFECTIVE 142 EMBRYO DEFECTIVE 2284 EMBRYO DEFECTIVE 529 ESD7 POL2A TILTED 1 | Early flowering.                                                                                                                                                                                                                                                                                                                                                                                                                                                                                                                                                                                          | 19947980 | 1 | 1 |
| AT1G17800 | CSTF64    | ESP1                                                                                                                                                        | Decreased organ size and fertility.                                                                                                                                                                                                                                                                                                                                                                                                                                                                                                                                                                       | 19965720 | 1 | 1 |
| AT1G17760 | CSTF77    |                                                                                                                                                             | female gametophyte lethal                                                                                                                                                                                                                                                                                                                                                                                                                                                                                                                                                                                 | 19965720 | 1 | 0 |
| AT2G03620 | MRS2-5    | MGT3                                                                                                                                                        | Homozygote has a WT phenotype, even under conditions of Mg <sup>2+</sup> stress.                                                                                                                                                                                                                                                                                                                                                                                                                                                                                                                          | 19966073 | 1 | 1 |
| AT1G80900 | MRS2-10   | MGT1                                                                                                                                                        | Homozygote has a WT phenotype, even under conditions of Mg <sup>2+</sup> stress.                                                                                                                                                                                                                                                                                                                                                                                                                                                                                                                          | 19966073 | 1 | 1 |
| AT1G16010 | MRS2-1    | MGT2                                                                                                                                                        | Homozygote has a WT phenotype, even under conditions of Mg <sup>2+</sup> stress.                                                                                                                                                                                                                                                                                                                                                                                                                                                                                                                          | 19966073 | 1 | 1 |
| AT1G55325 | GCT       | CCT CENTER CITY GRAND CENTRAL MAB2 MACCHI-BOU 2                                                                                                             | Uncoupling of growth and pattern formation in early embryogenesis. Patterning is delayed by several days, after which radial patterning beings in a remarkably normal manner.                                                                                                                                                                                                                                                                                                                                                                                                                             | 20023166 | 2 | 1 |
| AT1G80080 | TMM       | RLP17                                                                                                                                                       | Mutants produce stomata on the hypocotyl and also produce small groups of hypocotyl cells in an arrangement that resembles braided 'challah' bread.                                                                                                                                                                                                                                                                                                                                                                                                                                                       | 20056678 | 1 | 1 |
| AT1G65420 | NPQ7      | NONPHOTOCHEMICAL QUENCHING 7; T8F5.20; T8F5_20                                                                                                              | Homozygotes exhibit a low nonphotochemical quenching phenotype. Also, chlorophyll a+b content is higher than WT, whereas the chlorophyll a/b ratio was smaller than WT. Morphologically WT under normal growth conditions. Fv/Fm is almost identical to WT, as is the xanthophyll cycle pigment pool size.                                                                                                                                                                                                                                                                                                | 20087601 | 1 | 0 |
| AT1G65420 | NPQ7      | NONPHOTOCHEMICAL QUENCHING 7; T8F5.20; T8F5_20                                                                                                              | Nonphotochemical quenching measurements were lower than either of the single mutants.                                                                                                                                                                                                                                                                                                                                                                                                                                                                                                                     | 20087601 | 1 | 0 |
| AT2G01830 | WOL       | AHK4 ARABIDOPSIS HISTIDINE KINASE 4 ATCRE1 CRE1 CYTOKININ RESPONSE 1 WOL1 WOODEN LEG WOODEN LEG 1                                                           | Small SAM and limited root growth.                                                                                                                                                                                                                                                                                                                                                                                                                                                                                                                                                                        | 20110319 | 1 | 1 |
| AT1G27320 | AHK3      | ORE12                                                                                                                                                       | Small SAM and limited root growth.                                                                                                                                                                                                                                                                                                                                                                                                                                                                                                                                                                        | 20110319 | 1 | 1 |
| AT1G51450 | TRO       | ASH2R                                                                                                                                                       | embryo lethal                                                                                                                                                                                                                                                                                                                                                                                                                                                                                                                                                                                             | 20118203 | 1 | 1 |
| AT1G15520 | ABCG40    | ATABCG40 ATP-binding cassette 40 ATPDR12 PDR12 PLEIOTROPIC DRUG RESISTANCE 12 pleiotropic drug resistance 12                                                | Increased sensitivity to drought stress.                                                                                                                                                                                                                                                                                                                                                                                                                                                                                                                                                                  | 20133880 | 1 | 1 |
| AT1G77390 | CYCA1-2   | TAM                                                                                                                                                         | Meiocytes produce unreduced gametes by undergoing meiosis I but skipping meiosis II.                                                                                                                                                                                                                                                                                                                                                                                                                                                                                                                      | 20143347 |   |   |
| AT1G79580 | SMB       | NAC033                                                                                                                                                      | Delayed maturation and shedding of lateral root cap cells. The root cap extends into the differentiation zone.                                                                                                                                                                                                                                                                                                                                                                                                                                                                                            | 20197506 | 1 | 1 |
| AT1G79580 | SMB       | NAC033                                                                                                                                                      | same as smb-3 single mutant                                                                                                                                                                                                                                                                                                                                                                                                                                                                                                                                                                               | 20197506 | 1 | 1 |
| AT1G79580 | SMB       | NAC033                                                                                                                                                      | Root cap cells appear as a mass lacking uniform morphology. Cells can be highly elongated and twisted. Cells fail to stop elongation and to adopt the rigid, rectangular morphology of COL cells. When compared with smb-3, the triple mutant has the same number of complete LRC layers, and the appearance of the cells in those layers closely resembles that in smb-3. However, partial remains of older LRC layers remain attached to the meristem in the triple mutant, giving it a messy appearance. Remains of old LRC cap layers can be found still attached to the root along its whole length. | 20197506 | 1 | 1 |
| AT1G79580 | SMB       | NAC033                                                                                                                                                      | Same as smb-3 single mutant phenotype                                                                                                                                                                                                                                                                                                                                                                                                                                                                                                                                                                     | 20197506 | 1 | 1 |
| AT1G33290 | AT1G33290 | T1609.17; T1609.17                                                                                                                                          | WT phenotype                                                                                                                                                                                                                                                                                                                                                                                                                                                                                                                                                                                              | 20197506 | 1 | 1 |
| AT1G33290 | AT1G33290 | T1609.17; T1609.17                                                                                                                                          | Columella root cap cells fail to detach.                                                                                                                                                                                                                                                                                                                                                                                                                                                                                                                                                                  | 20197506 | 1 | 1 |
| AT1G33290 | AT1G33290 | T1609.17; T1609.17                                                                                                                                          | same as smb-3 single mutant                                                                                                                                                                                                                                                                                                                                                                                                                                                                                                                                                                               | 20197506 | 1 | 1 |
| AT1G33290 | AT1G33290 | T1609.17; T1609.17                                                                                                                                          | Root cap cells appear as a mass lacking uniform morphology. Cells can be highly elongated and twisted. Cells fail to stop elongation and to adopt the rigid, rectangular morphology of COL cells. When compared with smb-3, the triple mutant has the same number of complete LRC layers, and the appearance of the cells in those layers closely resembles that in smb-3. However, partial remains of older LRC layers remain attached to the meristem in the triple mutant, giving it a messy appearance. Remains of old LRC cap layers can be found still attached to the root along its whole length. | 20197506 | 1 | 0 |
| AT1G33280 | BRN1      | NAC015                                                                                                                                                      | WT phenotype                                                                                                                                                                                                                                                                                                                                                                                                                                                                                                                                                                                              | 20197506 | 1 | 1 |
| AT1G33280 | BRN1      | NAC015                                                                                                                                                      | Columella root cap cells fail to detach.                                                                                                                                                                                                                                                                                                                                                                                                                                                                                                                                                                  | 20197506 | 1 | 0 |
| AT1G33280 | BRN1      | NAC015                                                                                                                                                      | same as smb-3 single mutant                                                                                                                                                                                                                                                                                                                                                                                                                                                                                                                                                                               | 20197506 | 1 | 1 |
| AT1G33280 | BRN1      | NAC015                                                                                                                                                      | Root cap cells appear as a mass lacking uniform morphology. Cells can be highly elongated and twisted. Cells fail to stop elongation and to adopt the rigid, rectangular morphology of COL cells. When compared with smb-3, the triple mutant has the same number of complete LRC layers, and the appearance of the cells in those layers closely resembles that in smb-3. However, partial remains of older LRC layers remain attached to the meristem in the triple mutant, giving it a messy appearance. Remains of old LRC cap layers can be found still attached to the root along its whole length. | 20197506 | 3 | 0 |
| AT1G54960 | ANP2      |                                                                                                                                                             | Delayed growth, short roots, multiply branched root hairs, radially expanded root and hypocotyl cells. Aberrant microtubule organization and resistance to oryzalin.                                                                                                                                                                                                                                                                                                                                                                                                                                      | 20215588 | 3 | 1 |
| AT1G46768 | RAP2.1    | related To AP2.1                                                                                                                                            | The mutant plants showed an improved tolerance to the drought and cold.                                                                                                                                                                                                                                                                                                                                                                                                                                                                                                                                   | 20230648 | 1 | 1 |
| AT1G64790 | ILA       | ILITHYIA                                                                                                                                                    | Mutant plants are much smaller in size than Col-0 wild type and they have serrated leaves that are yellow to light green in color. Homozygous mutants are sterile and must be propagated as heterozygotes.                                                                                                                                                                                                                                                                                                                                                                                                | 20360018 | 3 | 3 |
| AT1G64790 | ILA       | ILITHYIA                                                                                                                                                    | Mutant plants are much smaller in size than Col-0 wild type and they have serrated leaves that are yellow to light green in color. Homozygous mutants are sterile and must be propagated as heterozygotes.                                                                                                                                                                                                                                                                                                                                                                                                | 20360018 | 3 | 3 |
| AT1G16540 | ABA3      | ABA DEFICIENT 3 AC12 ALTERED CHLOROPLAST IMPORT 2 ATABA3 ATLOS5 LOS5 LOW OSMOTIC STRESS 5 MOLYBDENUM COFACTOR SULFURASE SIR3 SIRTINOL RESISTANT 3           | Defective chloroplast import. Does not survive if grown on MS media without sucrose. In soil, aci2-1 had a small stature with dark green pigmentation. Rosette size was half that of the parent line. Leaves were reduced in length and width, serrated and fewer in number. Leaf protoplasts from had significantly more chloroplasts per cell than the parental line. aci2-1 also accumulated lipid droplets and large starch grains. Chloroplasts appeared smaller in aci2-1 than in the parental line.                                                                                                | 20374530 | 4 | 2 |
| AT2G01918 | PQL3      |                                                                                                                                                             | Mutant plant Does Not show the post illumination increase in Chl fluorescence due to the loss of NDH-mediated reduction of the plastoquinone pool in darkness.                                                                                                                                                                                                                                                                                                                                                                                                                                            | 20430763 |   |   |
| AT1G14150 | PNSL2     | PQL1 PQL2                                                                                                                                                   | Mutant plant Does Not show the post illumination increase in Chl fluorescence due to the loss of NDH-mediated reduction of the plastoquinone pool in darkness.                                                                                                                                                                                                                                                                                                                                                                                                                                            | 20430763 |   |   |
| AT1G14140 | PUMP3     | UCP3                                                                                                                                                        | Mutant plant Does Not show the post illumination increase in Chl fluorescence due to the loss of NDH-mediated reduction of the plastoquinone pool in darkness.                                                                                                                                                                                                                                                                                                                                                                                                                                            | 20430763 |   |   |
| AT1G14150 | PNSL2     | PQL1 PQL2                                                                                                                                                   | Mutant plants showed the post illumination increase in Chl fluorescence due to the loss of NDH-mediated reduction of the plastoquinone pool in darkness.                                                                                                                                                                                                                                                                                                                                                                                                                                                  | 20460499 | 1 | 0 |
| AT1G14140 | PUMP3     | UCP3                                                                                                                                                        | Mutant plants showed the post illumination increase in Chl fluorescence due to the loss of NDH-mediated reduction of the plastoquinone pool in darkness.                                                                                                                                                                                                                                                                                                                                                                                                                                                  | 20460499 | 1 | 0 |
| AT1G23540 | PERK12    | ATPERK12 IG11                                                                                                                                               | Increased axillary branching, reduced stature, reduced fertility.                                                                                                                                                                                                                                                                                                                                                                                                                                                                                                                                         | 20473553 | 3 | 1 |
| AT1G66600 | ABO3      | ABA overly sensitive mutant 3; ATRWKY63; T1217.5; T1217.5; WRKY DNA-binding protein 63; WRKY63                                                              | When grown on MS medium with ABA, abo3 mutant was more sensitive to ABA than the wild type during seedling establishment. Mutant seedlings exhibited slower root growth on MS medium as compared to the wild type. Mutant is impaired in ABA induced stomatal closure and more sensitive to drought stress than the wild type.                                                                                                                                                                                                                                                                            | 20487379 | 2 | 2 |
| AT1G67940 | ABC117    | NAP3                                                                                                                                                        | atst1r1 knock-out line exhibited increased sensitivity to Al. The roots of the knockout line were severely inhibited, in the presence of 2 mM Al whereas those of the wild type were hardly affected.                                                                                                                                                                                                                                                                                                                                                                                                     | 20498340 | 2 | 2 |
| AT1G55600 | WRKY10    | MIN13                                                                                                                                                       | Reduced seed size                                                                                                                                                                                                                                                                                                                                                                                                                                                                                                                                                                                         | 20545893 | 1 | 1 |
| AT1G18100 | MFT       |                                                                                                                                                             | Decreased rate of germination in the presence of ABA.                                                                                                                                                                                                                                                                                                                                                                                                                                                                                                                                                     | 20551347 | 1 | 1 |
| AT1G18100 | MFT       |                                                                                                                                                             | Decreased germination when grown in the presence of ABA.                                                                                                                                                                                                                                                                                                                                                                                                                                                                                                                                                  | 20551347 | 1 | 1 |
| AT1G66730 | LIG6      |                                                                                                                                                             | Delayed germination. Time to germination can be increased by 50%. Overall germination rate is not affected but the process is delayed. The effect is further enhanced under temperature or oxidative stress conditions.                                                                                                                                                                                                                                                                                                                                                                                   | 20584150 |   |   |

|           |              |                                                                                                                                                    |                                                                                                                                                                                                                                                                                                                                                                                                                                                                                                                                                                                                                                                                                                                                                                                                                                          |          |   |   |
|-----------|--------------|----------------------------------------------------------------------------------------------------------------------------------------------------|------------------------------------------------------------------------------------------------------------------------------------------------------------------------------------------------------------------------------------------------------------------------------------------------------------------------------------------------------------------------------------------------------------------------------------------------------------------------------------------------------------------------------------------------------------------------------------------------------------------------------------------------------------------------------------------------------------------------------------------------------------------------------------------------------------------------------------------|----------|---|---|
| AT1G66730 | LIG6         |                                                                                                                                                    | Delayed seed germination- even greater than in at1lg6-1 alone.                                                                                                                                                                                                                                                                                                                                                                                                                                                                                                                                                                                                                                                                                                                                                                           | 20584150 |   |   |
| AT1G31140 | AGL63        | GOA                                                                                                                                                | The only change in phenotype observed was a significant bending of fruits, suggesting asymmetrically longitudinal growth without any alteration in the fruit length.                                                                                                                                                                                                                                                                                                                                                                                                                                                                                                                                                                                                                                                                     | 20598091 | 1 | 1 |
| AT1G31810 | FH14         |                                                                                                                                                    | microspore formation is defective; microtubule arrays displayed abnormalities during the meiosis-associated process of microspore formation.                                                                                                                                                                                                                                                                                                                                                                                                                                                                                                                                                                                                                                                                                             | 20709814 | 2 | 1 |
| AT1G31800 | CYP97A3      | '' cytochrome P450; cytochrome P450; F5M6.19; F5M6.19; family 97; LUT5; LUTEIN DEFICIENT 5; polypeptide 3; polypeptide 3''; subfamily A            | microspore formation is defective; microtubule arrays displayed abnormalities during the meiosis-associated process of microspore formation.                                                                                                                                                                                                                                                                                                                                                                                                                                                                                                                                                                                                                                                                                             | 20709814 | 2 | 1 |
| AT1G09970 | LRR XI-23    | F21M12.36; F21M12.36; receptor-like kinase 7; RLK7                                                                                                 | T-DNA insertion lines showed a slight but statistically significant delay in germination and was more sensitive to oxidative stress.                                                                                                                                                                                                                                                                                                                                                                                                                                                                                                                                                                                                                                                                                                     | 20811905 | 2 | 2 |
| AT1G53240 | mdh1         | mitochondrial malate dehydrogenase 1                                                                                                               | mdh1-2 mmdh2-1 double mutants have no detectable mitochondrial malate dehydrogenase (MDH) activity and over a 40% reduction in total leaf MDH activity. They also have growth defects under long and short days.                                                                                                                                                                                                                                                                                                                                                                                                                                                                                                                                                                                                                         | 20876337 | 2 | 2 |
| AT1G50900 | LTD          | GDC1                                                                                                                                               | grow much slower than the wild type, and growth ceases at the vegetative growth stage before bolting. grana deficient. decreased chlorophyll content. accumulated very low amounts of LHClI trimer.                                                                                                                                                                                                                                                                                                                                                                                                                                                                                                                                                                                                                                      | 21098677 | 3 | 3 |
| AT1G06490 | CalS7        | Arabidopsis thaliana glucan synthase-like 7; ATGSL07; atgsl7; callose synthase 7; F12K11.17; F12K11.17; glucan synthase-like 7; gs107; GSL07; GSL7 | Callose deposition in the phloem, especially in the sieve elements, is greatly reduced in cs7-1. During sieve element development, callose fails to accumulate in the plasmodesmata of incipient sieve plates, resulting in the formation of sieve plates with less pores and no callose. Wounding can induce callose accumulation in leaves of cs7-1, but cannot induce callose accumulation in the sieve plates in this mutant. The mutant plants exhibit moderate reduction in seedling height and produce aberrant pollen grains and short siliques with aborted embryos.                                                                                                                                                                                                                                                            | 21175885 | 1 | 1 |
| AT1G65040 | Hrd1B        | ATHrd1B homolog of yeasT Hrd1                                                                                                                      | Endoplasmic reticulum (ER)-associated degradation process is blocked in hrd1a hrd1b double mutant.                                                                                                                                                                                                                                                                                                                                                                                                                                                                                                                                                                                                                                                                                                                                       | 21187394 | 1 | 1 |
| AT1G18260 | HRD3A        | EBS5                                                                                                                                               | Endoplasmic reticulum (ER)-associated degradation process is blocked and the unfolded protein response is activated in ebs5-5 mutant.                                                                                                                                                                                                                                                                                                                                                                                                                                                                                                                                                                                                                                                                                                    | 21187394 | 1 | 1 |
| AT1G10520 | Poi [lambda] | ATP [lambda] DNA polymerase [lambda]                                                                                                               | atp1 [lambda] mutants exhibit hypersensitive growth response to UV-B irradiation. Reduced proficiency in double strand break repair and nucleotide excision repair.                                                                                                                                                                                                                                                                                                                                                                                                                                                                                                                                                                                                                                                                      | 21227935 | 2 | 1 |
| AT1G10510 | emb2004      | embryo defective 2004                                                                                                                              | atp1 [lambda] mutants exhibit hypersensitive growth response to UV-B irradiation. Reduced proficiency in double strand break repair and nucleotide excision repair.                                                                                                                                                                                                                                                                                                                                                                                                                                                                                                                                                                                                                                                                      | 21227935 | 2 | 1 |
| AT1G51460 | ABC13        | ATP-binding cassette G13; F5D21.8; F5D21.8                                                                                                         | Flowers are seriously distorted in petal morphology and display petal-to-sepal and sepal-to-sepal fusions during early flower development. The fusions disappear during later flower development.                                                                                                                                                                                                                                                                                                                                                                                                                                                                                                                                                                                                                                        | 21232060 | 1 | 1 |
| AT1G51460 | ABC13        | ATP-binding cassette G13; F5D21.8; F5D21.8                                                                                                         | Petal epidermal cells do not have a wt conical structure and are flattened. Epidermal cuticular ridges on these cells are completely absent.                                                                                                                                                                                                                                                                                                                                                                                                                                                                                                                                                                                                                                                                                             | 21232060 | 1 | 1 |
| AT1G28010 | ABC14        | MDR12 PGP14                                                                                                                                        | Inflorescence stems from the homozygous mutants have smaller xylem vessels and smaller phloem areas compared to WT plants. Inflorescence apices also have a reduction in polar auxin transport.                                                                                                                                                                                                                                                                                                                                                                                                                                                                                                                                                                                                                                          | 21239383 | 2 | 2 |
| AT1G56560 | INVA         |                                                                                                                                                    | at1va mutants have reduced root growth, reduced invertase activity, and increased expression of antioxidant genes under basal conditions.                                                                                                                                                                                                                                                                                                                                                                                                                                                                                                                                                                                                                                                                                                | 21441406 | 3 | 1 |
| AT1G35580 | CINV1        | A alkaline cytosolic invertase 1 N-InV6 neutral invertase G                                                                                        | at1va mutants have reduced root growth, reduced invertase activity, and increased expression of antioxidant genes under basal conditions.                                                                                                                                                                                                                                                                                                                                                                                                                                                                                                                                                                                                                                                                                                | 21441406 | 3 | 2 |
| AT1G09780 | iPGAM1       | 2; 3-bisphosphoglycerate-independent phosphoglycerate mutase 1; F21M12.16; F21M12.16                                                               | Vegetative and reproductive growth are greatly reduced with respect to wild type. Pale reticulate leaf phenotype. Double mutants are self-sterile due to failure to produce pollen grains.                                                                                                                                                                                                                                                                                                                                                                                                                                                                                                                                                                                                                                               | 21813794 | 3 | 2 |
| AT2G05070 | LHC2.2       |                                                                                                                                                    | The mutant shows ABA insensitivity in stomatal movement, including promotion of stomatal closure and inhibition of stomatal opening. The detached leaves of the mutant lose more water than those of the wild-type plants under dehydration condition; both young seedlings and mature plants of the mutant have lower capacity to conserve water during drought stress in comparison with wild-type plants. The ROS levels increase in the mutant in comparison with wild-type plants in both the whole leaves and in guard cells. Treatment with low concentrations of ABA reduces ROS levels in both whole leaves (1 to 10 uM ABA application) and in guard cells (5 uM ABA application) in the mutant plants.                                                                                                                        | 22143917 | 2 | 1 |
| AT1G29920 | LHC1.1       | AB165 CAB2 LHCP-B                                                                                                                                  | The mutant shows ABA insensitivity in stomatal movement, including promotion of stomatal closure and inhibition of stomatal opening. The detached leaves of the mutant lose more water than those of the wild-type plants under dehydration condition; both young seedlings and mature plants of the mutant have lower capacity to conserve water during drought stress in comparison with wild-type plants. The ROS levels increase in the mutant in comparison with wild-type plants in both the whole leaves and in guard cells. Treatment with low concentrations of ABA reduces ROS levels in both whole leaves (1 to 10 uM ABA application) and in guard cells (5 uM ABA application) in the mutant plants.                                                                                                                        | 22143917 | 2 | 1 |
| AT1G29920 | LHC1.1       | AB165 CAB2 LHCP-B                                                                                                                                  | lhc1 lhc6 double mutant show ABA insensitivity than wild-type in stomatal movement, including promotion of stomatal closure and inhibition of stomatal opening. The detached leaves of the double mutant lose more water than those of wild-type plants under dehydration condition, and that both young seedlings and mature plants of the double mutant have lower capacity to conserve their water during drought stress in comparison with wild-type plants. The ROS levels increase in the double mutants in comparison with wild-type plants in both the whole leaves and in guard cells. Low concentrations ABA treatments reduce ROS levels of double mutants in both whole leaves (1 to 10 uM ABA application) and in guard cells (5 uM ABA application).                                                                       | 22143917 | 2 | 1 |
| AT1G15820 | LHC6         | CHLOROPHYLL PROTEIN 24; CP24; F7H2.16; F7H2.16; light harvesting complex photosystem II subunit 6                                                  | The mutant shows ABA insensitivity in stomatal movement, including promotion of stomatal closure and inhibition of stomatal opening. The detached leaves of the mutant lose more water than those of the wild-type plants under dehydration condition; both young seedlings and mature plants of the mutant have lower capacity to conserve water during drought stress in comparison with wild-type plants. The ROS levels increase in the mutant in comparison with wild-type plants in both the whole leaves and in guard cells. Treatment with low concentrations of ABA reduces ROS levels in both whole leaves (1 to 10 uM ABA application) and in guard cells (5 uM ABA application) in the mutant plants.                                                                                                                        | 22143917 | 2 | 1 |
| AT1G15820 | LHC6         | CHLOROPHYLL PROTEIN 24; CP24; F7H2.16; F7H2.16; light harvesting complex photosystem II subunit 6                                                  | lhc1 lhc6 double mutant show ABA insensitivity than wild-type in stomatal movement, including promotion of stomatal closure and inhibition of stomatal opening. The detached leaves of the double mutant lose more water than those of wild-type plants under dehydration condition, and that both young seedlings and mature plants of the double mutant have lower capacity to conserve their water during drought stress in comparison with wild-type plants. The ROS levels increase in the double mutants in comparison with wild-type plants in both the whole leaves and in guard cells. Low concentrations ABA treatments reduce ROS levels of double mutants in both whole leaves (1 to 10 uM ABA application) and in guard cells (5 uM ABA application).                                                                       | 22143917 | 2 | 2 |
| AT1G15820 | LHC6         | CHLOROPHYLL PROTEIN 24; CP24; F7H2.16; F7H2.16; light harvesting complex photosystem II subunit 6                                                  | lhc6 cch double mutant shows ABA insensitivity than wild-type in stomatal movement, including promotion of stomatal closure and inhibition of stomatal opening, and the strength of the ABA insensitive phenotypes is comparable to that of the cch mutant, stronger than that of the lhc6 single mutant and lhc1 lhc6 double mutant.                                                                                                                                                                                                                                                                                                                                                                                                                                                                                                    | 22143917 | 2 | 2 |
| AT1G43710 | SDC          | EMB1075 SDC1                                                                                                                                       | Under long day conditions, the size of atsd-1 seedlings was much smaller than that of the wild type and the mutant never reached the height of the mature wild type. Mutant was sterile and had multiple inflorescences. Under short day conditions, atsd-1 flowered earlier than the wild type and smaller size and multiple inflorescence defects in the mutant could be rescued.                                                                                                                                                                                                                                                                                                                                                                                                                                                      | 22489147 | 2 | 1 |
| AT1G31880 | BRX          | BREVIS RADIX NIP3;1 NLM9                                                                                                                           | Short-root phenotype, characterized by short primary root and more branched root system.                                                                                                                                                                                                                                                                                                                                                                                                                                                                                                                                                                                                                                                                                                                                                 | 15031265 | 1 | 1 |
| AT2G15820 | OTP51        |                                                                                                                                                    | Homozygous otp51-2 mutants can only survive in sucrose-supplemented in vitro cultures under low light conditions. The small developmentally delayed mutants are pale yellow under normal light conditions. otp51-2 mutants fail to splice intron 2 of the ycf3 transcript encoded in the chloroplast genome. Because YCF3 is required for the proper assembly of photosystem I (PSI). These mutants have multiple defects related to photosynthesis. They have lower levels of total protein, thylakoid membrane protein, and chlorophyll than wild-type plants when both are grown hydroponically. Chlorophyll a/b ratios are elevated in otp51-2 mutants, several PSI and PSII proteins cannot be detected, chlorophyll fluorescence patterns are altered, and the quantum efficiency of PSII is reduced. otp51-2 mutants also have el |          |   |   |
| AT2G01830 | WOL          | AHK4 ARABIDOPSIS HISTIDINE KINASE 4 ATCRE1 CRE1 CYTOKININ RESPONSE 1 WOL1 WOODEN LEG WOODEN LEG 1                                                  | Cytokinin-induced partial inhibition of cell division and greening of hypocotyl-derived calli.                                                                                                                                                                                                                                                                                                                                                                                                                                                                                                                                                                                                                                                                                                                                           |          |   |   |

|           |        |                                                                                                         |                                                                                                                                                                                                                                                                                                                                                                                                                                                                                                                                                                                                                                                                                                                    |  |  |
|-----------|--------|---------------------------------------------------------------------------------------------------------|--------------------------------------------------------------------------------------------------------------------------------------------------------------------------------------------------------------------------------------------------------------------------------------------------------------------------------------------------------------------------------------------------------------------------------------------------------------------------------------------------------------------------------------------------------------------------------------------------------------------------------------------------------------------------------------------------------------------|--|--|
| AT2G01830 | WOL    | AHK4 ARABIDOPSIS HISTIDINE KINASE 4<br>ATCRE1 CRE1 CYTOKININ RESPONSE 1<br>WOL1 WOODEN LEG WOODEN LEG 1 | Reduced sensitivity to cytokinin in root growth assay (exogenous application of cytokinins inhibits wildtype root elongation).                                                                                                                                                                                                                                                                                                                                                                                                                                                                                                                                                                                     |  |  |
| AT2G01830 | WOL    | AHK4 ARABIDOPSIS HISTIDINE KINASE 4<br>ATCRE1 CRE1 CYTOKININ RESPONSE 1<br>WOL1 WOODEN LEG WOODEN LEG 1 | Cytokinin insensitive (no inhibition of growth compared to wildtype).                                                                                                                                                                                                                                                                                                                                                                                                                                                                                                                                                                                                                                              |  |  |
| AT2G01830 | WOL    | AHK4 ARABIDOPSIS HISTIDINE KINASE 4<br>ATCRE1 CRE1 CYTOKININ RESPONSE 1<br>WOL1 WOODEN LEG WOODEN LEG 1 | Occasionally produces inflorescence stems with abnormal and non-functional flowers which did not produce seeds.                                                                                                                                                                                                                                                                                                                                                                                                                                                                                                                                                                                                    |  |  |
| AT2G01830 | WOL    | AHK4 ARABIDOPSIS HISTIDINE KINASE 4<br>ATCRE1 CRE1 CYTOKININ RESPONSE 1<br>WOL1 WOODEN LEG WOODEN LEG 1 | Shoot and root growth is very slow and leaf number is decreased compared to wildtype.                                                                                                                                                                                                                                                                                                                                                                                                                                                                                                                                                                                                                              |  |  |
| AT2G01830 | WOL    | AHK4 ARABIDOPSIS HISTIDINE KINASE 4<br>ATCRE1 CRE1 CYTOKININ RESPONSE 1<br>WOL1 WOODEN LEG WOODEN LEG 1 | Reduced cytokinin-induced inhibition of adventitious root formation compared to wildtype.                                                                                                                                                                                                                                                                                                                                                                                                                                                                                                                                                                                                                          |  |  |
| AT2G01830 | WOL    | AHK4 ARABIDOPSIS HISTIDINE KINASE 4<br>ATCRE1 CRE1 CYTOKININ RESPONSE 1<br>WOL1 WOODEN LEG WOODEN LEG 1 | No significant response in the cytokinin-induced assay for stimulation of cell division and greening of hypocotyl-derived calli.                                                                                                                                                                                                                                                                                                                                                                                                                                                                                                                                                                                   |  |  |
| AT2G01830 | WOL    | AHK4 ARABIDOPSIS HISTIDINE KINASE 4<br>ATCRE1 CRE1 CYTOKININ RESPONSE 1<br>WOL1 WOODEN LEG WOODEN LEG 1 | Prolonged plastochron.                                                                                                                                                                                                                                                                                                                                                                                                                                                                                                                                                                                                                                                                                             |  |  |
| AT2G01830 | WOL    | AHK4 ARABIDOPSIS HISTIDINE KINASE 4<br>ATCRE1 CRE1 CYTOKININ RESPONSE 1<br>WOL1 WOODEN LEG WOODEN LEG 1 | Shorter root than wildtype plant.                                                                                                                                                                                                                                                                                                                                                                                                                                                                                                                                                                                                                                                                                  |  |  |
| AT2G01830 | WOL    | AHK4 ARABIDOPSIS HISTIDINE KINASE 4<br>ATCRE1 CRE1 CYTOKININ RESPONSE 1<br>WOL1 WOODEN LEG WOODEN LEG 1 | The diameter of the shoot apical meristem is about three times smaller than that of wildtype.                                                                                                                                                                                                                                                                                                                                                                                                                                                                                                                                                                                                                      |  |  |
| AT2G01830 | WOL    | AHK4 ARABIDOPSIS HISTIDINE KINASE 4<br>ATCRE1 CRE1 CYTOKININ RESPONSE 1<br>WOL1 WOODEN LEG WOODEN LEG 1 | The size and activity of the root apical meristem is decreased with respect to wildtype.                                                                                                                                                                                                                                                                                                                                                                                                                                                                                                                                                                                                                           |  |  |
| AT2G01830 | WOL    | AHK4 ARABIDOPSIS HISTIDINE KINASE 4<br>ATCRE1 CRE1 CYTOKININ RESPONSE 1<br>WOL1 WOODEN LEG WOODEN LEG 1 | Enhancement of the inhibition of cytokinin-induced stimulation of cell division and greening of hypocotyl-derived calli compared to the response observed with CRE1 single mutants (e.g. cre1-10).                                                                                                                                                                                                                                                                                                                                                                                                                                                                                                                 |  |  |
| AT2G01830 | WOL    | AHK4 ARABIDOPSIS HISTIDINE KINASE 4<br>ATCRE1 CRE1 CYTOKININ RESPONSE 1<br>WOL1 WOODEN LEG WOODEN LEG 1 | No cytokinin-induced inhibition of adventitious root formation.                                                                                                                                                                                                                                                                                                                                                                                                                                                                                                                                                                                                                                                    |  |  |
| AT1G77300 | EPS    | ASH1 HOMOLOG 2 ASH2 CCR1 EARLY FLOWERING IN SHORT DAYS LAZ2 LAZARUS 2 SDG8 SET DOMAIN GROUP 8           | Reduced stature, bushy plants, reduced number of ovules, reduced fertility. Homeotic conversion of floral organs such as carpeloid sepals and stamen like petals. Defects in ovule and embryo sac development. Reduced pollen.                                                                                                                                                                                                                                                                                                                                                                                                                                                                                     |  |  |
| AT1G77300 | EPS    | ASH1 HOMOLOG 2 ASH2 CCR1 EARLY FLOWERING IN SHORT DAYS LAZ2 LAZARUS 2 SDG8 SET DOMAIN GROUP 8           | Short bushy plants. Reduced fertility-ovule number reduced by 80%                                                                                                                                                                                                                                                                                                                                                                                                                                                                                                                                                                                                                                                  |  |  |
| AT1G67370 |        |                                                                                                         | Despite no apparent defect in DNA double-strand breaks formation in asy1, DNA cross-over formation is severely compromised.                                                                                                                                                                                                                                                                                                                                                                                                                                                                                                                                                                                        |  |  |
| AT1G64440 | UGE4   | REB1 RHD1                                                                                               | Bulging epidermal cells on the roots. The percentage of these cells appears to be dependent on environmental conditions (light intensity for example). This phenotype is not observed in the meristem but is first observed basal of the meristem.                                                                                                                                                                                                                                                                                                                                                                                                                                                                 |  |  |
| AT1G64440 | UGE4   | REB1 RHD1                                                                                               | Root growth significantly diminished.                                                                                                                                                                                                                                                                                                                                                                                                                                                                                                                                                                                                                                                                              |  |  |
| AT1G64440 | UGE4   | REB1 RHD1                                                                                               | At 18°C, the phenotype is indistinguishable from that of wildtype.                                                                                                                                                                                                                                                                                                                                                                                                                                                                                                                                                                                                                                                 |  |  |
| AT1G64440 | UGE4   | REB1 RHD1                                                                                               | At the restrictive temperature, epidermal bulging is observed and roots fail to grow straight in the elongation zone although this mutation does not appear to abolish gravitropic sensitivity.                                                                                                                                                                                                                                                                                                                                                                                                                                                                                                                    |  |  |
| AT1G64440 | UGE4   | REB1 RHD1                                                                                               | Temperature sensitive (33°C) phenotype.                                                                                                                                                                                                                                                                                                                                                                                                                                                                                                                                                                                                                                                                            |  |  |
| AT1G61040 | VIP5   |                                                                                                         | Defective in maintenance of FLC activity in nonvernalized plants. Undetectable FLC mRNA expression. Early flowering under short day photoperiods.                                                                                                                                                                                                                                                                                                                                                                                                                                                                                                                                                                  |  |  |
| AT1G27320 | AHK3   | ORE12                                                                                                   | No inhibition of stimulation of cell division and greening of hypocotyl-derived calli when treated with cytokinin (similar to wildtype response).                                                                                                                                                                                                                                                                                                                                                                                                                                                                                                                                                                  |  |  |
| AT1G27320 | AHK3   | ORE12                                                                                                   | Normal roots.                                                                                                                                                                                                                                                                                                                                                                                                                                                                                                                                                                                                                                                                                                      |  |  |
| AT1G27320 | AHK3   | ORE12                                                                                                   | Smaller leaves and shorter stems than wildtype.                                                                                                                                                                                                                                                                                                                                                                                                                                                                                                                                                                                                                                                                    |  |  |
| AT1G27320 | AHK3   | ORE12                                                                                                   | Enhancement of the inhibition of cytokinin-induced stimulation of cell division and greening of hypocotyl-derived calli compared to the response observed with CRE1 single mutants (e.g. cre1-10).                                                                                                                                                                                                                                                                                                                                                                                                                                                                                                                 |  |  |
| AT1G27320 | AHK3   | ORE12                                                                                                   | Reduced sensitivity to cytokinin in root growth assay (exogenous application of cytokinins inhibits wildtype root elongation).                                                                                                                                                                                                                                                                                                                                                                                                                                                                                                                                                                                     |  |  |
| AT1G27320 | AHK3   | ORE12                                                                                                   | Cytokinin insensitive (no inhibition of growth compared to wildtype).                                                                                                                                                                                                                                                                                                                                                                                                                                                                                                                                                                                                                                              |  |  |
| AT1G27320 | AHK3   | ORE12                                                                                                   | Occasionally produces inflorescence stems with abnormal and non-functional flowers which did not produce seeds.                                                                                                                                                                                                                                                                                                                                                                                                                                                                                                                                                                                                    |  |  |
| AT1G27320 | AHK3   | ORE12                                                                                                   | Shoot and root growth is very slow and leaf number is decreased compared to wildtype.                                                                                                                                                                                                                                                                                                                                                                                                                                                                                                                                                                                                                              |  |  |
| AT1G04870 | PRMT10 | PRMT4.2                                                                                                 | This mutant has delayed flowering compared to wild type plants when grown under long day conditions. Analysis of growth under short day conditions indicates that these mutants are not disrupted in the photoperiod pathway. They also seem to be able to respond to vernalization signals and to gibberellin. But they have an impaired autonomous pathway to flowering. FLC transcripts are up-regulated and SOC1 transcripts are down-regulated in these mutants through an unknown mechanism. There are no discernible changes in several types of histone modifications examined at the FLC locus in this mutant background nor are there changes in transcript levels for several autonomous pathway genes. |  |  |
| AT1G04870 | PRMT10 | PRMT4.2                                                                                                 | This mutant has delayed flowering compared to wild type plants when grown under long day conditions.                                                                                                                                                                                                                                                                                                                                                                                                                                                                                                                                                                                                               |  |  |
| AT1G02580 | MEA    | EMB173 EMBRYO DEFECTIVE 173 FIS1 MEDEA SDG5                                                             | Heterozygous embryos abort if the mutant allele is derived from the female, but develop normally if it is derived from the male. Embryos derived from mutant eggs abort irrespective of the paternal contribution. Thus, the mea mutant displays maternal-effect embryo lethality.                                                                                                                                                                                                                                                                                                                                                                                                                                 |  |  |



## New Relation

| Gene names                                   | phenotype                                                                                                                                                                                                                                                                                                                                                                                                                                           | pubmed id |
|----------------------------------------------|-----------------------------------------------------------------------------------------------------------------------------------------------------------------------------------------------------------------------------------------------------------------------------------------------------------------------------------------------------------------------------------------------------------------------------------------------------|-----------|
| pom2                                         | This flower had reduced filament elongation as well as thickening of the style                                                                                                                                                                                                                                                                                                                                                                      | 7743935   |
| pom2                                         | low fertility                                                                                                                                                                                                                                                                                                                                                                                                                                       | 7743935   |
| CORE                                         | shoot cell expansion                                                                                                                                                                                                                                                                                                                                                                                                                                | 7743935   |
| CORE                                         | severe defects in cell elongation, root growth (as defined by length increase) was severely reduced                                                                                                                                                                                                                                                                                                                                                 | 7743935   |
| KNAT1                                        | overexpression of genes active in the shoot apical meristem can lead to abnormal leaf development                                                                                                                                                                                                                                                                                                                                                   | 9427751   |
| AG01                                         | fewer flower                                                                                                                                                                                                                                                                                                                                                                                                                                        | 9427751   |
| ACL                                          | defective in general cell expansion and may also be affected in basic processes of cell wall biosynthesis                                                                                                                                                                                                                                                                                                                                           | 9427751   |
| MEA                                          | regulating gene expression through modulation of higher-order chromatin structure                                                                                                                                                                                                                                                                                                                                                                   | 9545225   |
| ABA1                                         | abscisic acid-deficient                                                                                                                                                                                                                                                                                                                                                                                                                             | 9668132   |
| NPQ1                                         | synthesizes sufficient abscisic acid                                                                                                                                                                                                                                                                                                                                                                                                                | 9668132   |
| ARC6                                         | initiates both proplastid and chloroplast division                                                                                                                                                                                                                                                                                                                                                                                                  | 10417716  |
| ARC6                                         | Chloroplast size                                                                                                                                                                                                                                                                                                                                                                                                                                    | 10417716  |
| ARC1                                         | ARC1 acts independently of the other four ARC genes                                                                                                                                                                                                                                                                                                                                                                                                 | 10417716  |
| LER                                          | early flowering under short days                                                                                                                                                                                                                                                                                                                                                                                                                    | 10469647  |
| GI                                           | GI mutants have elongated hypocotyls and are resistant to the herbicide paraquat                                                                                                                                                                                                                                                                                                                                                                    | 10469647  |
| GI                                           | GI mutant plants accumulate starch under some conditions                                                                                                                                                                                                                                                                                                                                                                                            | 10469647  |
| ABC                                          | produce the four organ types of the typical eudicot flower                                                                                                                                                                                                                                                                                                                                                                                          | 10821278  |
| ABC                                          | pecify the fate of flower organ primordia                                                                                                                                                                                                                                                                                                                                                                                                           | 10821278  |
| MADS-box                                     | diverse aspects of plant development and their functional roles correlate closely with their domains of RNA accumulation                                                                                                                                                                                                                                                                                                                            | 10821278  |
| ERECTA                                       | internode elongation between internal flowers                                                                                                                                                                                                                                                                                                                                                                                                       | 10821278  |
| SEP1/2/3                                     | overlapping functions required for petal, stamen and carpel development                                                                                                                                                                                                                                                                                                                                                                             | 10821278  |
| RSF1                                         | hypocotyl elongation was less inhibited in both FR and blue light                                                                                                                                                                                                                                                                                                                                                                                   | 10982420  |
| RSF1                                         | cryptochrome-mediated blue-light signaling                                                                                                                                                                                                                                                                                                                                                                                                          | 10982420  |
| EG01                                         | mutants show gametogenesis defects and sterility                                                                                                                                                                                                                                                                                                                                                                                                    | 11016954  |
| CRE1                                         | CRE1 expression conferred a cytokinin-dependent growth phenotype on a yeast mutant that lacked the endogenous histidine kinase SLN1                                                                                                                                                                                                                                                                                                                 | 11234017  |
| UROD                                         | responsible for the accumulation of uroporphyrin III and lesion-mimic phenotype                                                                                                                                                                                                                                                                                                                                                                     | 11489187  |
| FT                                           | encodes a protein with similarity to phosphatidylethanolamine binding protein;                                                                                                                                                                                                                                                                                                                                                                      | 10852935  |
| FWA                                          | controls floral meristem identity genes redundantly with LFY                                                                                                                                                                                                                                                                                                                                                                                        | 10852935  |
| LFY                                          | LFY may activate other floral meristem identity genes, which could be repressed by the combination of fwa                                                                                                                                                                                                                                                                                                                                           | 10852935  |
| AN                                           | regulate the polarity of cell growth by controlling the arrangement of cortical MTs; regulates polar elongation in the leaf - width direction                                                                                                                                                                                                                                                                                                       | 11889033  |
| ROT3                                         | regulates polar elongation in the leaf - length direction                                                                                                                                                                                                                                                                                                                                                                                           | 11889033  |
| MER15                                        | play a role at the early stages of leaf morphogenesis                                                                                                                                                                                                                                                                                                                                                                                               | 11889033  |
| phyA                                         | responsible photoreceptor in far-red light, mediates anthocyanin accumulation by a common pathway to the cryptochromes, involving stimulation of biosynthesis via an HY5-dependent signalling pathway, which also mediates responsivity to cytokinins                                                                                                                                                                                               | 17217468  |
| PIP5K                                        | plays an essential role in coordinating plant growth, especially in response to environmental factors                                                                                                                                                                                                                                                                                                                                               | 17220200  |
| At5PTase1                                    | have nonredundant roles in hydrolyzing inositol second-messenger substrates and that regulation of Ins(1,4,5)P3 levels is important during germination and early seedling development                                                                                                                                                                                                                                                               | 17237190  |
| At5PTase2                                    | have nonredundant roles in hydrolyzing inositol second-messenger substrates and that regulation of Ins(1,4,5)P3 levels is important during germination and early seedling development                                                                                                                                                                                                                                                               | 17237190  |
| NST1                                         | key regulators of the formation of secondary walls in woody tissues of Arabidopsis thaliana                                                                                                                                                                                                                                                                                                                                                         | 17237351  |
| NST3                                         | key regulators of the formation of secondary walls in woody tissues of Arabidopsis thaliana                                                                                                                                                                                                                                                                                                                                                         | 17237351  |
| IFL1/REV                                     | controls the identity of the adaxial side of various organs, including xylem (Talbert et al., 1995; Zhong and Ye, 1999; Emery et al., 2003), is perhaps involved in regulating the identity of xylem because ifl1 mutant plants fail to form interfascicular fibers in inflorescence stems but differentiate ectopic xylem-like sclerified cells in upper regions of inflorescence stems as a result of a reduction of basipetal transport of auxin | 17237351  |
| TEOSINTE BRANCHED1, CYCLOIDEA, and PCF (TCP) | has been reported to play roles in various aspects of plant development                                                                                                                                                                                                                                                                                                                                                                             | 17307931  |
| TCP3SRDX                                     | induce abnormal development in various organs, regardless of their identity                                                                                                                                                                                                                                                                                                                                                                         | 17307931  |
| CUC                                          | cotyledons and lateral organ primordia, preventing organ development                                                                                                                                                                                                                                                                                                                                                                                | 17307931  |
| BRE1                                         | cell size                                                                                                                                                                                                                                                                                                                                                                                                                                           | 17329565  |
| LFY                                          | transcriptionally activated upon the floral transition                                                                                                                                                                                                                                                                                                                                                                                              | 17351828  |
| SAG12                                        | a gene associated with senescence and has been defined as an authentic molecular marker of senescence                                                                                                                                                                                                                                                                                                                                               | 17355433  |
| PARL1                                        | expressed early in embryonic development, in regions associated with cell division and in vascular cells, is localized to the nucleus                                                                                                                                                                                                                                                                                                               | 17369435  |
| AP2                                          | control embryo development in specific and early embryo expression domains                                                                                                                                                                                                                                                                                                                                                                          | 17376809  |

|                                      |                                                                                                                                                                                                                                                                                                                                                     |          |
|--------------------------------------|-----------------------------------------------------------------------------------------------------------------------------------------------------------------------------------------------------------------------------------------------------------------------------------------------------------------------------------------------------|----------|
| SnRK2                                | is activated by hyperosmotic stress and is also involved in abscisic acid (ABA) signaling in response to water stress                                                                                                                                                                                                                               | 17404219 |
| APX1                                 | APX1 is a key hydrogen peroxide (H <sub>2</sub> O <sub>2</sub> ) removal enzyme (Pnueli et al., 2003), the expression of which is known to be induced by wounding and other oxidative stresses                                                                                                                                                      | 17416636 |
| TRANSPORT INHIBITOR RESPONSE1 (TIR1) | mediate the degradation of AUXIN/INDOLE-3-ACETIC ACID (AUX/IAA) repressors in response to auxin                                                                                                                                                                                                                                                     | 17435085 |
| PIL5                                 | increases abscisic acid (ABA) levels by activating ABA biosynthetic genes and repressing an ABA catabolic gene                                                                                                                                                                                                                                      | 17449805 |
| UGE2 and UGE4                        | synergistically influenced cell wall galactose content, which was correlated with shoot growth                                                                                                                                                                                                                                                      | 17496119 |
| NUA                                  | acts as a docking site at the inner nuclear pore for activities required for desumoylation and mRNA export and that disruption of this docking affects the expression of key regulators of plant development                                                                                                                                        | 17513499 |
| EER4                                 | regulates a previously unknown resetting or dampening mechanism for the ethylene signalling pathway                                                                                                                                                                                                                                                 | 17526916 |
| EIN2                                 | necessary to induce developmental arrest during seed germination, and seedling establishment, as well as subsequent vegetative growth, thereby allowing the survival and growth of plants under the adverse environmental conditions.                                                                                                               | 17533512 |
| DUB                                  | cell growth and differentiation, neural function, gene regulation, embryogenesis, eye development, stress, and oncogenesis                                                                                                                                                                                                                          | 17559514 |
| FUL                                  | inabaxial tissue specification                                                                                                                                                                                                                                                                                                                      | 17592013 |
| SHP                                  | inabaxial tissue specification                                                                                                                                                                                                                                                                                                                      | 17592013 |
| JAGGED                               | ncodes a putative transcription factor with a single C <sub>2</sub> H <sub>2</sub> zinc-finger domain and promotes growth in lateral organs                                                                                                                                                                                                         | 17592013 |
| BOP1 and BOP2                        | are largely restricted to the base of developing lateral organs                                                                                                                                                                                                                                                                                     | 17601823 |
| PUCHI                                | encodes a putative APETALA2/ethylene-responsive element binding protein transcription factor, is required for the coordinated pattern of cell divisions during lateral root formation in <i>Arabidopsis thaliana</i>                                                                                                                                | 17630277 |
| XERICO                               | promotes accumulation of abscisic acid (ABA) that antagonizes GA effects                                                                                                                                                                                                                                                                            | 17922773 |
| GAMYB                                | modulates GA-regulated floral development                                                                                                                                                                                                                                                                                                           | 17922773 |
| ATHB-1                               | encodes a homeodomain Leu zipper protein involved in leaf development                                                                                                                                                                                                                                                                               | 17922773 |
| IAA13                                | is a repressor of auxin signaling involved in embryonic root development                                                                                                                                                                                                                                                                            | 17922773 |
| SPATULA                              | inhibit seed germination by repressing GA3ox transcription and inducing expression of GA2ox                                                                                                                                                                                                                                                         | 17922773 |
| PIL5                                 | inhibit seed germination by repressing GA3ox transcription and inducing expression of GA2ox                                                                                                                                                                                                                                                         | 17922773 |
| MONOPTEROS                           | ncodes a transcription factor mediating embryo axis formation and vascular development                                                                                                                                                                                                                                                              | 17960244 |
| ORE7                                 | encodes an AT-hook motif protein                                                                                                                                                                                                                                                                                                                    | 17971039 |
| PDLP1                                | damaging effect of reduced cell-to-cell communication                                                                                                                                                                                                                                                                                               | 18215111 |
| LOF1                                 | has a role in meristem initiation or maintenance                                                                                                                                                                                                                                                                                                    | 19542355 |
| CUC                                  | function in organ separation during reproductive development                                                                                                                                                                                                                                                                                        | 19542355 |
| LAS                                  | function in organ separation during reproductive development                                                                                                                                                                                                                                                                                        | 19542355 |
| At5g23940                            | encodes an acyl-transferase, also led to altered trichome phenotype                                                                                                                                                                                                                                                                                 | 19626137 |
| MOS4                                 | suppress the autoimmune phenotypes of <i>sn1</i> , and that MOS4 is part of a nuclear complex called the MOS4-Associated Complex (MAC) along with the transcription factor AtCDC5 and the WD-40 protein PRL1                                                                                                                                        | 19629177 |
| GL3                                  | is known to activate the expression of downstream target genes, including an HD-Zip transcription factor GL2 and a WRKY transcription factor TTG2                                                                                                                                                                                                   | 19717615 |
| TTG1                                 | is known to activate the expression of downstream target genes, including an HD-Zip transcription factor GL2 and a WRKY transcription factor TTG2                                                                                                                                                                                                   | 19717615 |
| GL1                                  | is known to activate the expression of downstream target genes, including an HD-Zip transcription factor GL2 and a WRKY transcription factor TTG2                                                                                                                                                                                                   | 19717615 |
| TRIPTYCHON (TRY)                     | encodes a single-repeat MYB protein that acts as a negative regulator of trichome initiation                                                                                                                                                                                                                                                        | 19717615 |
| SBP-box                              | ontrol shoot maturation not only in the vegetative phase but also in the reproductive phase, and that SBP-box genes have divided roles in shoot maturation                                                                                                                                                                                          | 19880401 |
| FUL                                  | controls fruit and leaf development as well as inflorescence architecture                                                                                                                                                                                                                                                                           | 19880401 |
| AtVPS16                              | responsible for <i>vacuoleless1</i> ( <i>vc11</i> ), which is defective in vacuole formation, and the homozygous mutant showed the embryonic lethal phenotype                                                                                                                                                                                       | 19884248 |
| PcG                                  | early flowering, that is also caused by mutations in genes encoding other proteins related to chromatin remodelling such as LIKE-HETEROCHROMATIN PROTEIN 1/TERMINAL FLOWER 2 (LHP1/TFL2), EARLY BOLTING IN SHORT DAYS (EBS) and INCURVATA 2                                                                                                         | 19947980 |
| STIMPY                               | plays a unique role in maintaining pluripotency and proliferation in meristematic tissue in <i>Arabidopsis</i>                                                                                                                                                                                                                                      | 20110319 |
| STIP                                 | acts downstream of cytokinin-sensing in the establishment of the SAM during this period                                                                                                                                                                                                                                                             | 20110319 |
| ABCG40                               | transport diterpenoids associated with plant defense based on three findings (i) it is up-regulated by pathogen infection, (ii) its amino acid sequence is similar to those of other diterpenoid transporters such as NpABC1 and SpTUR2, and (iii) the <i>atabcg40</i> mutant plant is altered in tolerance to the toxicity of diterpenoid sclareol | 20133880 |
| DREB1                                | regulon and enhances plant freezing tolerance                                                                                                                                                                                                                                                                                                       | 20230648 |
| BRC                                  | prevents the rosette branch outgrowth downstream of the MAX pathway, and the pathway including BRC component required auxin induced apical dominance                                                                                                                                                                                                | 20473553 |

|                |                                                                                                                                                                                                                                                                   |          |
|----------------|-------------------------------------------------------------------------------------------------------------------------------------------------------------------------------------------------------------------------------------------------------------------|----------|
| HXX            | regulates ROS levels and perhaps also the signalling pathways leading to antioxidant defence responses                                                                                                                                                            | 21441406 |
| Atisal-1       | Debranching enzyme activity is absent                                                                                                                                                                                                                             | 15743447 |
| ISA3           | fulfil the same role as ISA1/ISA2.                                                                                                                                                                                                                                | 15743447 |
| ACX1           | root elongation                                                                                                                                                                                                                                                   | 15743450 |
| NPR1           | plant immunity                                                                                                                                                                                                                                                    | 15799997 |
| PR             | cell death                                                                                                                                                                                                                                                        | 15799997 |
| FRA3 mutant    | displays an aberrant organization of F-actin cables and a dramatic reduction in secondary wall thickness in fiber cells                                                                                                                                           | 15805481 |
| CalS1          | pathogen infection                                                                                                                                                                                                                                                | 15842618 |
| CalS12         | pathogen infection                                                                                                                                                                                                                                                | 15842618 |
| Atpul-1 mutant | No significant modification of the starch accumulation phenotype was observed in the Atpul-1 mutant.                                                                                                                                                              | 15849301 |
| BMY8           | low temperature                                                                                                                                                                                                                                                   | 15894744 |
| DET2           | shorter hypocotyls                                                                                                                                                                                                                                                | 15773850 |
| SWP            | defining the duration of the cell proliferation phase in the leaf primordium                                                                                                                                                                                      | 15937226 |
| CDC2A          | reduces cell proliferation in leaves while increasing cell size                                                                                                                                                                                                   | 15937226 |
| SIM            | Shoot organogenesis induced on SIM medium in seedling-root explants of WT and lec mutants.                                                                                                                                                                        | 16034595 |
| SMT2           | growth and development                                                                                                                                                                                                                                            | 16040657 |
| BR             | hypocotyl elongation                                                                                                                                                                                                                                              | 16040657 |
| ADC2           | Overexpression of ADC2 in Arabidopsis induces dwarfism                                                                                                                                                                                                            | 16045478 |
| RBR1           | cell division                                                                                                                                                                                                                                                     | 16055636 |
| AGO2           | embryo development                                                                                                                                                                                                                                                | 16081530 |
| OsERP3         | OsERP3 protein is homologous to C2-type Ca <sup>2+</sup> binding motifs                                                                                                                                                                                           | 16113226 |
| TAN            | functions both in the early and late phases of embryo development.                                                                                                                                                                                                | 16113228 |
| PIN1           | auxin transport                                                                                                                                                                                                                                                   | 16210544 |
| IKU2           | encodes a leucine-rich repeat receptor kinase, a large family of genes with roles in signal transduction pathways in plant development and metabolism                                                                                                             | 16293693 |
| BMY8           | exhibit a more sensitive phenotype for photosynthetic apparatus functionality                                                                                                                                                                                     | 16297066 |
| TWN2           | The first is ValRS, where the seed phenotype exhibited by twn2 (Zhang and Somerville, 1997) is indicative of a weak allele with an insertion in the 5' untranslated region (UTR) of a gene thought to encode a protein localized to the cytosol and mitochondria. | 16297076 |
| WOL            | WOL is not essential for phloem development                                                                                                                                                                                                                       | 11114832 |
| KNAT1 and STM  | redundant in embryo and vegetative development in the absence of AS1                                                                                                                                                                                              | 11934861 |
| stm-2          | they form fewer lateral shoots and more flowers, most of which remain incomplete                                                                                                                                                                                  | 11934861 |
| STM            | STM may have additional roles in meristem maintenance that are assumed by other factors redundant with STM that are only revealed in asl stm-1 double mutants.                                                                                                    | 11934861 |
| stm-11 knat2   | stm-11 knat2 double mutants have a stm phenotype and have no GUS expression                                                                                                                                                                                       | 11934961 |
| atgpat1-1      | To ascribe the impaired male fertility of the atgpat1-1 mutant to the disruption of AtGPAT1                                                                                                                                                                       | 12897259 |
| AtGPAT1        | The absence of AtGPAT1 may enhance or activate the expression of other GPAT isoforms to compensate for the loss of function normally exerted by AtGPAT1 during oil synthesis.                                                                                     | 12897259 |
| KU70           | Two types of experiments were performed to verify that the telomere elongation phenotype was associated with the T-DNA insertion in KU70                                                                                                                          | 12032094 |
| aba2-11        | aba2-11 seeds were relatively insensitive to such osmotic stress, germinated well, and were able to green and expand cotyledons.                                                                                                                                  | 12172025 |
| aba2-11        | aba2-11 plants were more sensitive to salt or water stress at later stages of development                                                                                                                                                                         | 12172025 |
| CRE1           | result in reduced cytokinin sensitivity in callus proliferation, greening, and shoot formation, and in inhibition of root growth, whereas hyperexpression of ARR1 results in the opposite phenotype                                                               | 12410813 |
| ARR1           | result in reduced cytokinin sensitivity in callus proliferation, greening, and shoot formation, and in inhibition of root growth, whereas hyperexpression of ARR1 results in the opposite phenotype                                                               | 12410813 |
| POLAR          | two transcriptional corepressors have been identified that regulate lateral growth in leaves: AN, which promotes polar cell expansion                                                                                                                             | 12615938 |
| DRL1           | The relationship between DRL1 gene function and cell cycle regulation could explain the reduction in leaf cell number upon recessive mutation                                                                                                                     | 12615938 |
| ant1           | The ANT gene promotes cell proliferation, and in the ant1 mutant, the reduced cell number in organs also is compensated for by an increase in cell size.                                                                                                          | 12615938 |
| SLY1           | Mutations in SLY1 prevent the degradation of RGA in both the presence and absence of GA, leading to RGA inhibition of stem elongation and a dwarf phenotype.                                                                                                      | 12724538 |
| rga-24         | The rga-24 mutation clearly resulted in a partial rescue of the sly1-10 dwarf phenotype but did not significantly suppress the germination or fertility defects of sly1-10.                                                                                       | 12724538 |
| SLY1           | Loss of SLY1 function results in all of the phenotypes expected of a GA response mutant, including increased seed dormancy, growth as a dark green dwarf, delayed flowering, and reduced fertility.                                                               | 12724538 |
| sly1-2         | The first screen recovered the ethyl methanesulfonate-induced sly1-2 allele that suppressed the ability of abil-1 (abscisic acid-insensitive) to germinate on 3 μM abscisic acid.                                                                                 | 12724538 |

|        |                                                                                                                                                                                                                                                                                                |          |
|--------|------------------------------------------------------------------------------------------------------------------------------------------------------------------------------------------------------------------------------------------------------------------------------------------------|----------|
| las-4  | Different from the wild type, in which lateral shoots are positioned in the axils of their subtending leaves, the las-4 mutant showed a tendency toward concaulescence, that is, the point of separation between lateral shoots and the main axis was often displaced acropetally (Fig. 2E,F). | 12730136 |
| AtREV3 | If AtREV3 also is involved in TLS of several kinds of DNA damage, rev3-1 plants that have suffered such DNA damage should show root growth defects similar to those caused by UV treatments.                                                                                                   | 12953110 |
| HOT2   | In previous work, we identified single recessive alleles of four loci required for thermotolerance of hypocotyl elongation, hot1-1, hot2-1, hot3-1, and hot4-1.                                                                                                                                | 12805605 |
| HSP101 | Despite this decrease, 10-d-old hot3-1 plants showed normal acquired thermotolerance (Fig. 3), indicating that the level of Hsp101 must still be sufficient for thermotolerance at this growth stage.                                                                                          | 12805605 |
| PHYB   | whereas PHYB translocates into the nucleus only under red light                                                                                                                                                                                                                                | 14508006 |
| PHYA   | Hypocotyl elongation is regulated by both PHYA and PHYB                                                                                                                                                                                                                                        | 14508006 |
| PHYB   | Hypocotyl elongation is regulated by both PHYA and PHYB                                                                                                                                                                                                                                        | 14508006 |
| CHS    | The expression of the chalcone synthase gene (CHS), which encodes the first enzyme in the anthocyanin biosynthesis pathway, is modulated by light                                                                                                                                              | 14508006 |
| PIF3   | We showed that PIF3 is a positive component for CHS induction, whereas it is a negative component for the inhibition of hypocotyl elongation, cotyledon opening, and cotyledon expansion.                                                                                                      | 14508006 |
| ELF3   | The mutation in ELF3 caused longer hypocotyls and enhanced acute induction of CAB by light, whereas ELF3 overexpression caused shorter hypocotyls                                                                                                                                              | 14508006 |
| CCA1   | The overexpression of either CCA1 or LHY caused longer hypocotyls and induction of CAB                                                                                                                                                                                                         | 14508006 |
| PRR9   | Plants that constitutively express PRR5 or PRR9 exhibit a hypersensitive seedling deetiolation phenotype in Rc and flower early, indicating that the aberrant expression of these genes interferes with normal phytochrome responses                                                           | 14563930 |
| PRR7   | The reduced sensitivity of prr7 to Rc also was evident in the expansion of the cotyledons.                                                                                                                                                                                                     | 14563930 |
| PRR7   | prr7 also had a defect in its responsiveness to FRC, apparent as reduced inhibition of hypocotyl elongation.                                                                                                                                                                                   | 14563930 |
| phy    | The characterization of phy mutants demonstrates that these photoreceptors have crucial functions during seed germination, seedling deetiolation, shade avoidance, and the transition from vegetative to reproductive growth                                                                   | 14615593 |
| var    | However, variegated leaves contain chlorotic portions in which plastids appear to lack normal thylakoids; thus, thylakoid amounts may be lower in var mutants than in the wild type when equal amounts of fresh tissue are used.                                                               | 14630971 |
| PEX5   | Overexpression of PEX5 can partially rescue the sucrose dependence and root growth defects of pex6.                                                                                                                                                                                            | 14745029 |
| HMGR   | HMGR is essential for cytokinin biosynthesis in tobacco Bright Yellow-2 cultured cells, and inhibition of HMGR reduces cytokinin content and cell proliferation activity                                                                                                                       | 14871314 |
| YABBY  | expressed in primary lateral organs where they play roles in organ polarity and growth                                                                                                                                                                                                         | 16623911 |
| KAN    | KAN genes have roles in ovule development, as indicated by the reduced growth of the outer integument observed in some kan mutant combinations                                                                                                                                                 | 16623911 |
| AtNAP  | These data strongly suggest that AtNAP and its homologs play an important role in leaf senescence in Arabidopsis and possibly in other plant species.                                                                                                                                          | 16640597 |
| NAC    | Roles of the NAC family genes include embryo and shoot meristem development, lateral root formation, auxin signaling, defense and abiotic stress response                                                                                                                                      | 16640597 |
| AtNAP  | RNA gel blot analysis showed that the expression of AtNAP in rosette leaves of Arabidopsis is closely associated with the progression of leaf senescence                                                                                                                                       | 16640597 |
| SAG12  | SAG12 is a highly senescence-specific gene in Arabidopsis and has been widely used as a molecular marker for leaf senescence                                                                                                                                                                   | 16640597 |
| FIE    | Mutations impairing components of the MEA-FIE complex show pre- and post-fertilization phenotypes associated with abnormal cell proliferation                                                                                                                                                  | 16651654 |
| fis    | In these fis class mutants (mea, fie, fis2, and msil), the central cell initiates endosperm development without fertilization.                                                                                                                                                                 | 16651654 |
| FIS    | in FIS class genes all mutations lead to maternal-effect seed abortion.                                                                                                                                                                                                                        | 16651654 |
| PSI    | Both organisms are impaired in PSI activity, but differ substantially in that Ycf37-deficient Synechocystis cells can grow photoautotrophically and accumulate a functional PSI complex, whereas the higher plant mutant is lethal and lacks PSI completely                                    | 16679416 |
| AGL24  | AGL24 promotes inflorescence identity, and its expression is downregulated by APETALA1 (AP1) and LEAFY to establish floral meristem identity.                                                                                                                                                  | 16679456 |
| AGL24  | Mutations in AGL24 confer a dosage-dependent late-flowering phenotype, indicating that AGL24 is a promoter of the floral transition                                                                                                                                                            | 16679456 |
| SVP    | svp mutants show a dosage-dependent early-flowering phenotype, indicating that SVP is a repressor of the floral transition                                                                                                                                                                     | 16679456 |
| SVP    | These experiments showed that SVP is expressed in the secondary inflorescence meristems but was absent in the primary inflorescence meristem.                                                                                                                                                  | 16679456 |
| AGL24  | AGL24 is also expressed in the floral meristem, and in later stages of flower development, weak expression is observed in stamens and carpels.                                                                                                                                                 | 16679456 |
| AG     | AG is the class C gene of Arabidopsis and is expressed in the inner part of the floral meristem where stamen and carpel primordia develop                                                                                                                                                      | 16679456 |

|         |                                                                                                                                                                                                                                                              |          |
|---------|--------------------------------------------------------------------------------------------------------------------------------------------------------------------------------------------------------------------------------------------------------------|----------|
| AG      | The LUG and SEU proteins are considered to form a corepressor complex that prevents AG expression in the outer two whorls during flower development                                                                                                          | 16679456 |
| apl     | Furthermore, in the axil of the first-whorl organs, a new apl flower develops.                                                                                                                                                                               | 16679456 |
| RTE1    | The suppressed phenotype segregated 1:16, indicating that rte1-2 could not suppress the Landsberg etrl allele.                                                                                                                                               | 16682642 |
| POLAR   | Polar auxin transport plays an important role in a wide variety of plant growth processes                                                                                                                                                                    | 16690816 |
| axr4    | The axr4 mutant is resistant to 2,4-D, and because AUX1 may be functional in the LRC in axr4 mutants, this would suggest that functional AUX1 in the LRC alone is not sufficient for 2,4-D-sensitive root growth.                                            | 16690816 |
| AUX1    | Our results suggest that the axr4 phenotype, including auxin-resistant root growth and reduced gravitropism, is caused by defective AUX1 trafficking in epidermal cells.                                                                                     | 16690816 |
| AtALMT1 | Al-activated root exudation of malate and citrate was profiled in the root exudate solutions from WT and AtALMT1 MT plants grown in hydroponic culture.                                                                                                      | 16740662 |
| roll-2  | The moderate influence of roll-1 suggests that this mutation mainly affects the cell wall structure, whereas the effect of roll-2 is more dramatic and might also include other processes besides the biosynthesis of Rha.                                   | 16766693 |
| LRX6    | LRX6 is specifically expressed during lateral root development in wild-type plants (Baumberger et al., 2003a) and is not known to influence root hair formation                                                                                              | 16766693 |
| ATS1    | It was also apparent that the reduced growth allows the plant to maintain a relatively high PG level, and one might conclude that regulatory mechanisms are in place to coordinate PG biosynthesis in the chloroplast and plant growth at the level of ATS1. | 16774646 |
| ATS1    | Repression of ATS2 expression resulted in reduced growth, but the plants were pale-yellow and had more strongly reduced PG contents than ATS1 RNAi lines                                                                                                     | 16774646 |
| gl2     | Analyses of gl2 mutants revealed that the GL2 gene is necessary for both root hairless cell specification and the local outgrowth of the trichome in shoot epidermal cells                                                                                   | 16778018 |
| HDG2    | As is the case with the GL2 promoter (Hung et al., 1998), the HDG2 promoter was found to drive GUS expression in the hairless cell files of the hypocotyl epidermis (Fig. 5, B and C), in which stomatal differentiation is repressed.                       | 16778018 |
| HDG12   | The excess branching phenotype of the trichome in hdg11-1 is enhanced by hdg12-2, suggesting that both HDG11 and HDG12 act in repressing the outgrowth of trichomes.                                                                                         | 16778018 |
| sgr5-1  | The sgr5-1 mutant shows reduced gravitropism in the inflorescence stem but its root and hypocotyl have normal gravitropism.                                                                                                                                  | 16813575 |
| SGR5    | Analysis of GUS expression under the control of the SGR5 promoter revealed that SGR5 is mainly expressed in the endodermis, the gravity-sensing tissue in inflorescence stems.                                                                               | 16813575 |
| sgr2    | direction of gravity in mutants that exhibit no or reduced gravitropism, namely sgr2                                                                                                                                                                         | 16813575 |
| sgr5-2  | The sgr5-2 allele derived from the Landsberg erecta ecotype also showed reduced shoot gravitropism compared with wild-type Ler                                                                                                                               | 16813575 |
| tg2-1   | Expression of the tg2-1 mutant cDNA caused a dominant-negative effect replicating the tg2 mutant phenotype.                                                                                                                                                  | 16818883 |
| SEN1    | Expression of SEN1 is indicative of senescence                                                                                                                                                                                                               | 16829587 |
| PSKR1   | Root growth of pskr1-1 seedlings was slightly reduced, whereas root growth of AtPSKR1ox was comparable to that of wild type                                                                                                                                  | 16829587 |
| PSKR1   | culture, resulting in formation of a smaller callus than the wild type after 6 weeks                                                                                                                                                                         | 16829587 |
| PSKR1   | Moreover, in the root elongation assay, pskr1-1 seedlings exhibited the same cytokinin response as wild-type seedlings                                                                                                                                       | 16829587 |
| NADK3   | Consistent with the results for young seedlings, we found that nadk3 adult plants were more susceptible to osmotic stress, high salt and ABA than wild-type, although they were relatively tolerant to stress compared to young seedlings                    | 16856986 |
| NADK3   | Our results suggest that NADK3 is a negative regulator of ABA responses during seed germination in Arabidopsis.                                                                                                                                              | 16856986 |
| TIC21   | We renamed CIA5 as Arabidopsis Tic21 (At Tic21) and propose that it functions as part of the inner membrane protein-conducting channel and may be more important for later stages of leaf development.                                                       | 16891400 |
| CIA5    | Expression data and single and double mutant phenotypes of cia5 and At tic20-1 suggest that CIA5 and Tic20 may perform similar functions and that CIA5 is more important for later and Tic20 is more important for earlier stages of leaf development.       | 16891400 |
| AP1     | In whorl 2, PI, AP3, AP1 and SEP presumably regulate a set of downstream structural genes (so called realizators that encode proteins required for the cell division and differentiation events that lead to petal organogenesis.                            | 16902407 |
| AP1     | RABBIT EARS, whose expression is under the control of AP1, is involved in second whorl organ development                                                                                                                                                     | 16902407 |
| BIG     | Very recently, an E3 ubiquitin ligase - encoding gene, BIG BROTHER (BB), has been shown to limit plant organ size by controlling cell proliferation                                                                                                          | 16902407 |
| BPEp    | (C) RT-PCR analysis of BPEp (top) and BPEub (middle) mRNA accumulation in wt A. thaliana inflorescence (i), flower buds (b), open flowers at the onset of petal senescence (o), rosette leaves (Lr), cauline leaves (Lc) and inflorescence stem (s)          | 16902407 |
| AP3     | Therefore, BPEp presumably acts downstream of the PI/AP3 heterodimer during petal development.                                                                                                                                                               | 16902407 |



|          |                                                                                                                                                                                                                                                                                                                                                 |          |
|----------|-------------------------------------------------------------------------------------------------------------------------------------------------------------------------------------------------------------------------------------------------------------------------------------------------------------------------------------------------|----------|
| AP1      | As the tissues used in this experiment were mostly from flower buds older than stages 5 and 6, BPEp accumulation is most likely to be controlled by the protein complex formed by AP3, PI, SEP and AP1 during petal organogenesis.                                                                                                              | 16902407 |
| BPEp     | Therefore, BPEp is the first protein that specifically limits petal organ size by controlling the postmitotic rate of cell growth and expansion                                                                                                                                                                                                 | 16902407 |
| ASI      | demonstrating that ASI and PIN1 function redundantly to promote leaf development.                                                                                                                                                                                                                                                               | 16971475 |
| esp3     | One class of mutants represented by esp3 had reduced stature, early flowering (see below), and altered leaf morphology                                                                                                                                                                                                                          | 17008405 |
| MSI1     | Development of msil-as plants was delayed, and plants had a reduced rosette size, a delayed flowering time and reduced growth of primary shoots, although more severe symptoms of fasciation, such as stem bifurcation, were not observed                                                                                                       | 17021044 |
| WSGs     | The absence of starch was coupled with the accumulation of very high levels of WSGs (whatever extraction method was used) that were not observed in other lines (Tables 3 and 4). Moreover, this double mutant displayed a lower growth rate, a reduced size of the mature plant, a pale color, and a general wilting of the inflorescence      | 17028209 |
| AtIPT3   | Mutants lacking AtIPT3, 5, and 7 were severely inhibited in shoot growth, whereas lateral roots elongated more                                                                                                                                                                                                                                  | 17062755 |
| ELCis    | The multinuclear phenotype found in elc mutants indicates that ELCis is involved in the regulation of cell division.                                                                                                                                                                                                                            | 17090720 |
| SLIM1    | Both slim1-1 and slim1-2 alleles showed 30% reduction of root growth compared with the parental line                                                                                                                                                                                                                                            | 17114350 |
| CP24     | However, the photosynthetic rate in limiting light was slightly depressed in the plants lacking CP24, and there was a reduction in growth rate of the kolhcb6 plants compared with the wild type: the rate of increase in rosette diameter was slower, the average time for flowering increased by several days, and the fresh weight was lower | 17114352 |
| nrp1-1   | In the nrp1-1 nrp2-1 double mutant, arrest of cell cycle progression at G2/M and disordered cellular organization occurred in root tips                                                                                                                                                                                                         | 17122067 |
| FLC      | vernalization represses FLC expression, thus causing rapid flowering                                                                                                                                                                                                                                                                            | 17138694 |
| mtk/eto3 | When Met cycle knockout and ethylene overproduction were combined in the mtk/eto3 double mutant, a reduced capacity for ethylene synthesis was observed in seedlings                                                                                                                                                                            | 17144895 |
| mtk/eto3 | The mtk/eto3 double mutant displayed a metabolic plant phenotype that was similar to mtk with reduced AdoMet levels at sulfur-limiting conditions.                                                                                                                                                                                              | 17144895 |
| AtEBP    | AtEBP is an ethylene-induced gene that served as a positive control for ethylene treatment                                                                                                                                                                                                                                                      | 17144895 |
| hacl     | Consistent with the flowering phenotypes, the FLC mRNA levels in the hac1 hac5 and hac1 hac12 double mutants were considerably increased compared to those in the hac1 single mutants                                                                                                                                                           | 17144897 |
| tmt1     | in wild-type plants and 0.39 and 0.41 $\mu\text{mol/g}$ fresh weight, respectively, in the two tmt1 mutant lines (Figure 8A representing slightly 30%) reduced glucose contents.                                                                                                                                                                | 17158605 |
| OMR1     | Visual analysis of tha2-1/tha2-1 P35S-omr1-5 homozygotes showed some chlorosis, leaf curling, and misshapen flowers (see Supplemental Figure 10 online) but otherwise viable plants with normal seed set                                                                                                                                        | 17172352 |
| gidla    | Although single mutants developed normally, gidla gidc and gidla gidlb displayed reduced stem height and lower male fertility, respectively, indicating some functional specificity                                                                                                                                                             | 17194763 |
| DELLA    | Deletions or specific missense mutations of the conserved motifs (DELLA and/or VHYNP) within the DELLA domain render the mutant proteins resistant to GA-induced degradation, leading to a GA-insensitive dwarf phenotype                                                                                                                       | 17194763 |
| gal-3    | This is clearly illustrated in the severely GA-deficient mutant gal-3, which displays dramatically reduced leaf expansion, and stem and root elongation                                                                                                                                                                                         | 17194763 |
| PAC      | It is interesting to note that PAC can inhibit root growth further in the gidla-1 gidlb-1 gidlc-1 mutant                                                                                                                                                                                                                                        | 17194763 |
| gidla    | The gidla single mutant and both double mutants lacking functional GID1a display phenotypic defects in reproductive development, including stem length, silique length, and fertility                                                                                                                                                           | 17194763 |
| cdka     | In accordance, the overexpression of a mutant cdka;1 allele in which the putative phosphorylated Tyr residue is mutated also did not result in an obvious cell division phenotype                                                                                                                                                               | 17209125 |
| MADS-box | This suggests that while the MIKC factors are important for controlling flower development, type I MADS-box genes might control specific processes during ovule and seed development                                                                                                                                                            | 18346189 |
| AGL80    | In the agl80 mutant the nucleolus and vacuole of the central cell fail to mature properly; in addition, endosperm development is not initiated after fertilization of agl80 female gametophytes                                                                                                                                                 | 18346189 |
| etr1-3   | In contrast, mutations that block ethylene responses, etr1-3 and ein2-5, enhance root formation and render it insensitive to the effect of ACC, even though these mutants have reduced root elongation at high ACC doses                                                                                                                        | 18363780 |
| pny      | The pny mutant also exhibits defects in fruit development as the pny fruit shows a narrower replum, an abnormal pattern of lignification, and septum fusion defects                                                                                                                                                                             | 18390591 |
| bam3     | Representative plants were selected to show the reduced growth rate of bam3 and bam4 mutants                                                                                                                                                                                                                                                    | 18390594 |
| LUG      | Second, we identified a relatively minor role of LUH compared with LUG in flower development, as the luh-1 single mutation does not affect flower development but luh-1/+ can enhance the floral phenotype of lug                                                                                                                               | 18390806 |



|           |                                                                                                                                                                                                                                                                                |          |
|-----------|--------------------------------------------------------------------------------------------------------------------------------------------------------------------------------------------------------------------------------------------------------------------------------|----------|
| ARF2      | ARF2 has also been shown to mediate auxin-responsive gene expression and negatively regulates cell expansion                                                                                                                                                                   | 18483219 |
| AP2       | Loss-of-function mutations in AP2, encoding a transcription factor, lead to a range of floral defects that correlate with increased seed mass                                                                                                                                  | 18483219 |
| BIG       | The E3 ligase BIG BROTHER (BB) negatively regulates the duration of cell proliferation in leaves and petals, possibly by targeting growth stimulators for degradation, and is proposed as a bona fide organ size regulator                                                     | 18483219 |
| PI3K      | The broad and significant role of PI3K was first suggested by the results of Welters et al. (1994) showing that plants containing an antisense construct for VPS34 are severely inhibited in growth and development.                                                           | 18515640 |
| K-uk      | The turnover rates of K-G-3 and K-uk might be different from those of other kaempferol glycosides, leading to abnormal levels of free aglycone kaempferol, which in turn affect plant development                                                                              | 18567791 |
| STT3a     | Mutations in STT3a, a subunit of the oligosaccharyltransferase complex responsible for protein N-glycosylation, may also affect the cell wall, particularly under salt stress                                                                                                  | 18612099 |
| DC3000    | Transgenic Arabidopsis plants with constitutively suppressed AteIF5A-2 exhibited marked resistance to programmed cell death induced by virulent Pst DC3000, and there was a corresponding reduction in pathogen growth and development of disease symptoms in the plant tissue | 18633122 |
| AteIF5A-2 | The results indicate that AteIF5A-2 is a key element of the signal transduction pathway resulting in plant programmed cell death                                                                                                                                               | 18633122 |
| DHS       | For example, constitutive suppression of DHS in Arabidopsis results in several phenotypes, including delayed natural leaf senescence, delayed bolting, increased rosette leaf and root biomass, and enhanced seed yield                                                        | 18633122 |
| GL2       | Root hair-like cell expansion in the hypocotyl epidermis was previously observed in transgenic plants expressing recombinant GLABRA2 (GL2), which was modified to activate the expression of genes involved in root hair cell differentiation                                  | 18718934 |
| ibr       | Indeed, these ibr mutants display additional phenotypes associated with peroxisome defects, such as sucrose dependence during seedling development due to slowed oxidation of seed storage fatty acids                                                                         | 18725356 |
| ibr1      | ibr1 and ibr10 mutants display IBA- and 2,4-DB-resistant root elongation                                                                                                                                                                                                       | 18725356 |
| PAD4      | A reasonable hypothesis is the so-called amplification loop model, in which SA induces the expression of the PAD4 gene and then the PAD4 protein activates SA synthesis after pathogen infection                                                                               | 18753285 |
| BAH1      | These results suggest that BAH1 regulates pathogen-induced localized cell death and age-related cell death in SA-dependent and SA-independent manners, respectively                                                                                                            | 18753285 |
| LEC1      | a cellular environment that promotes embryo development and that this environment coordinates the morphogenesis and maturation phases                                                                                                                                          | 11573014 |
| LEC2      | somatic embryo formation                                                                                                                                                                                                                                                       | 11573014 |
| FUS3      | encodes a regulatory protein                                                                                                                                                                                                                                                   | 11573014 |
| ABI3      | a transcription factor that operates primarily during the maturation phase                                                                                                                                                                                                     | 11573014 |
| ARR5      | lateral root formation                                                                                                                                                                                                                                                         | 14973166 |
| BA        | root elongation                                                                                                                                                                                                                                                                | 14973166 |
| ARR8      | primary root tip                                                                                                                                                                                                                                                               | 14973166 |
| ARR4      | shoot formation                                                                                                                                                                                                                                                                | 14973166 |
| ARR4      | hypersensitive phenotype                                                                                                                                                                                                                                                       | 14973166 |
| FDH       | the cell wall                                                                                                                                                                                                                                                                  | 14973169 |
| gus       | flower                                                                                                                                                                                                                                                                         | 14973169 |
| H1STONE   | inflorescence                                                                                                                                                                                                                                                                  | 14973282 |
| AP1       | flower                                                                                                                                                                                                                                                                         | 14973282 |
| Sav-0     | short-root phenotype                                                                                                                                                                                                                                                           | 15031265 |
| Uk-1      | root phenotype                                                                                                                                                                                                                                                                 | 15031265 |
| F2        | root phenotype                                                                                                                                                                                                                                                                 | 15031265 |
| gus       | cell proliferation                                                                                                                                                                                                                                                             | 15031265 |
| F3        | root phenotype                                                                                                                                                                                                                                                                 | 15031265 |
| SHY2      | root growth                                                                                                                                                                                                                                                                    | 15031265 |
| Uk-1      | root growth                                                                                                                                                                                                                                                                    | 15031265 |
| Sav-0     | cell number                                                                                                                                                                                                                                                                    | 15031265 |
| ARR15     | altered development                                                                                                                                                                                                                                                            | 15053761 |
| MTs       | cell expansion                                                                                                                                                                                                                                                                 | 15084720 |
| DC3000    | DC3000                                                                                                                                                                                                                                                                         | 15085136 |
| AHK2      | growth and development                                                                                                                                                                                                                                                         | 15155880 |
| AHK2      | seedling phenotype                                                                                                                                                                                                                                                             | 15155880 |
| AHK2      | growth and development                                                                                                                                                                                                                                                         | 15155880 |
| AHK4      | phosphate starvation                                                                                                                                                                                                                                                           | 15155880 |
| AHK2      | leaf phenotype                                                                                                                                                                                                                                                                 | 15155880 |
| SLY1      | infertile                                                                                                                                                                                                                                                                      | 15155881 |
| DELLA     | plant growth                                                                                                                                                                                                                                                                   | 15155881 |
| POLAR     | cell expansion                                                                                                                                                                                                                                                                 | 15155883 |
| CYTOKININ | shoot induction                                                                                                                                                                                                                                                                | 15166290 |
| CYTOKININ | cell division                                                                                                                                                                                                                                                                  | 15166290 |
| AHK2      | inflorescence                                                                                                                                                                                                                                                                  | 15166290 |
| AXR1      | longer hypocotyls                                                                                                                                                                                                                                                              | 15181201 |
| ASK1      | flower                                                                                                                                                                                                                                                                         | 15208391 |
| E3        | organ development                                                                                                                                                                                                                                                              | 15208391 |
| HY5       | shorter hypocotyls                                                                                                                                                                                                                                                             | 15208391 |

|             |                                                                  |          |
|-------------|------------------------------------------------------------------|----------|
| E3          | flower                                                           | 15208391 |
| SA          | pseudomonas syringae                                             | 15269331 |
| EDS1        | cell death                                                       | 15269331 |
| PCD         | cell death                                                       | 15269331 |
| HR          | plant defense                                                    | 15269331 |
| NPR1        | cell death                                                       | 15269331 |
| EDS1        | plant defense                                                    | 15269331 |
| PIL5        | gravitropism                                                     | 15486102 |
| PHYB        | seed germination                                                 | 15486102 |
| HFR1        | hypocotyl elongation                                             | 15486102 |
| PHYB        | gravitropism                                                     | 15486102 |
| HFR1        | constitutive photomorphogenic phenotypes                         | 15486102 |
| PIL5OX      | far-red light                                                    | 15486102 |
| PIL5        | hypocotyl elongation                                             | 15486102 |
| PHYB        | seed germination                                                 | 15486102 |
| PEX5        | reduced auxin response                                           | 15548601 |
| PEX5        | seed development                                                 | 15548601 |
| NCED        | a key regulatory enzyme in ABA biosynthesis                      | 15574845 |
| OF          | cell pattern                                                     | 15618487 |
| SCM         | epidermis development                                            | 15618487 |
| GUS         | lateral root primordium                                          | 15659098 |
| LATERAL     | vascular differentiation                                         | 15659631 |
| INVOLVED    | cell wall biosynthesis                                           | 15659631 |
| IN          | root elongation                                                  | 15659631 |
| LATERAL     | lateral root formation                                           | 15659631 |
| HOT1-4      | thermotolerance                                                  | 15659638 |
| COIL        | thermotolerance                                                  | 15659638 |
| HOT1-4      | heat stress                                                      | 15659638 |
| RE          | pale-green leaves                                                | 15686525 |
| FB1         | cell death                                                       | 15703061 |
| POLAR       | required for vascular differentiation and patterning             | 16299182 |
| POLAR       | auxin accumulation                                               | 16299182 |
| CA2         | vascular development                                             | 16299182 |
| ARR8        | circadian phenotype                                              | 16326972 |
| PHYB        | reduced phyb signaling                                           | 16326972 |
| PHYB        | long-hypocotyl phenotype                                         | 16339853 |
| LEP         | curled leaves                                                    | 16339853 |
| LEP         | leaf development                                                 | 16339853 |
| LEP         | short-hypocotyl phenotype                                        | 16339853 |
| LEP         | mutant seedling phenotype                                        | 16339853 |
| GATA        | seed germination                                                 | 16359390 |
| ABH1        | aba-hypersensitive                                               | 16359390 |
| L1          | abscisic acid                                                    | 16359390 |
| SA          | germination efficiency                                           | 16359390 |
| SE          | root system                                                      | 16361392 |
| PHYA        | seed germination                                                 | 16361392 |
| PHYB        | far-red light                                                    | 16361392 |
| COBRA       | cell expansion                                                   | 16367956 |
| RIN4        | cell death                                                       | 16367962 |
| SAG12       | senescence                                                       | 16367962 |
| EDS1        | loss-of-function phenotype                                       | 16367962 |
| BRs         | shoot elongation                                                 | 1637964  |
| AXR2        | root elongation                                                  | 1637964  |
| DET2        | hypocotyl elongation                                             | 1637964  |
| ActP        | physiological response                                           | 16367966 |
| RCN1        | the regulatory subunit of protein phosphatase 2A                 | 16377756 |
| AXR3        | bushy phenotype                                                  | 16377756 |
| SEN4        | a marker gene for dark-induced and age-dependent leaf senescence | 16407152 |
| RABBIT EARS | a regulator of petal development                                 | 16412084 |
| AP3         | cell division                                                    | 16412084 |
| AP2         | flower                                                           | 16412084 |
| LUG         | reduced number                                                   | 16412084 |
| T1          | inflorescence                                                    | 16412086 |
| GFP         | flower                                                           | 16415209 |
| POLAR       | auxin transport                                                  | 16460509 |
| GLC         | ethylene treatment                                               | 16461383 |
| CHIP        | plant growth                                                     | 16467298 |
| CDC48A      | as a monomer and may function in regulating plant growth         | 16473966 |
| SA          | defense pathway                                                  | 16473969 |
| EDS1        | lacking a functional SA pathway                                  | 16473969 |
| PPR         | control cytoplasmic male sterility                               | 16489121 |
| HPAEC-PAD   | high performance anion-exchange                                  | 16495218 |
| RPM1        | structurally related                                             | 16531493 |
| cyclin B1   | promoter - GFP fusion                                            | 16553896 |
| BOP         | lateral organ development                                        | 16554365 |
| NPR1        | severe disease symptoms                                          | 16603654 |
| CCA1        | expression had an altered phase                                  | 16617099 |

|                |                                                       |           |
|----------------|-------------------------------------------------------|-----------|
| R              | a higher degree of pathogen-induced stress            | 16623885  |
| LRP1           | produced an elongated root phenotype                  | 18835563  |
| FLC            | inhibits the expression of flowering-time integrators | 18849490  |
| WUS            | shoot stem cells and leaf development                 | 18950478  |
| VH1/BRL2       | repressed by ABA                                      | 19000166  |
| ARF7 and ARF19 | LR formation                                          | 19037657  |
| gs             | photorespiratory nitrogen metabolism                  | 19048287  |
| IPT            | increased secondary growth                            | 19074290  |
| ABI5           | the expression of the LEA gene                        | 191553448 |
| PNY            | aspects of floral specification                       | 191757771 |
| Erd15          | induced under dehydration stress                      | 19210750  |
| MYB            | required for trichome initiation                      | 19223001  |
| RPT5a          | essential for male gametophyte development            | 19223514  |
| AGD10          | root hair development                                 | 19237690  |
